# Supplementary material for: Divergent regulation of KCNQ1/E1 by targeted recruitment of protein kinase A to distinct sites on the channel complex
Source: eLife journal article supplement (doi:10.7554/elife.83466), 2023-08-31

**Figure 2B**

**Anti-phosphoQ1 immunoblot**

- 1: Q1-YFP + E1 + nano
- 2: Q1-YFP + E1 + nanoCa
- 3: Q1 + E1-YFP + pcDNA3
- 4: Q1 + E1-YFP + free Ca

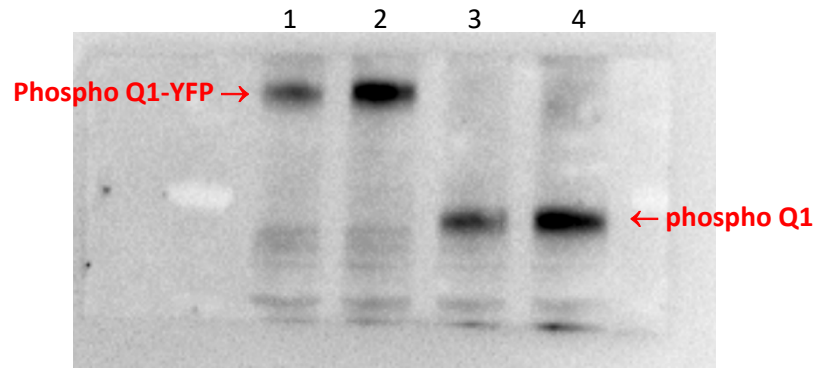

**Figure 2B**

**Anti-actin immunoblot**

- 1: Q1-YFP + E1 + nano
- 2: Q1-YFP + E1 + nanoCa
- 3: Q1 + E1-YFP + pcDNA3
- 4: Q1 + E1-YFP + free Ca

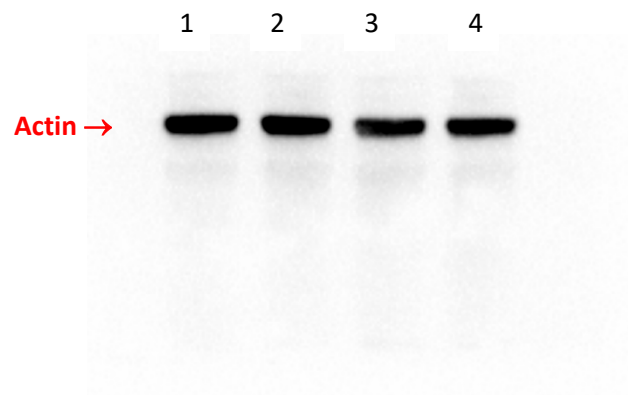

**Figure 2B**

**Anti-Q1 immunoblot**

- 1: Q1-YFP + E1 + nano
- 2: Q1-YFP + E1 + nanoCa
- 3: Q1 + E1-YFP + pcDNA3
- 4: Q1 + E1-YFP + free Ca

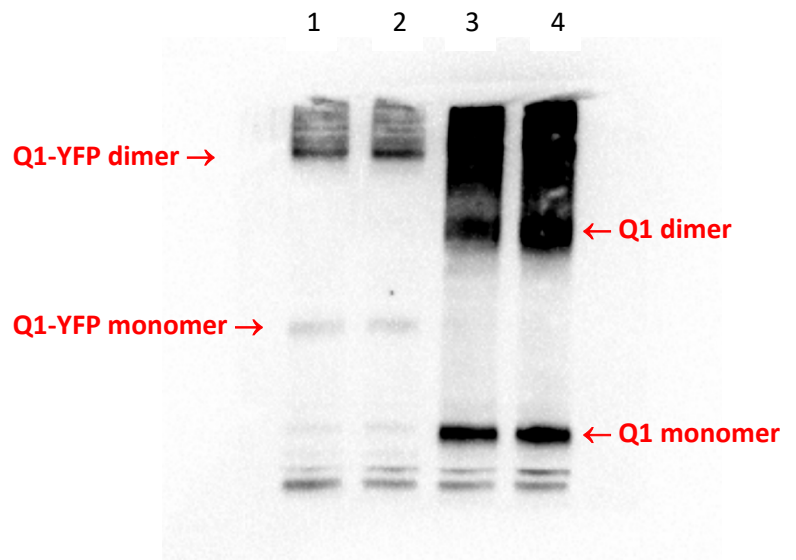

### Figure 2F

#### Anti-phosphoQ1 immunoblot

- 1: Q1 + E1-YFP + nanoCa
- 2: Q1 + E1-YFP + nano
- 3: Q1 + E1-YFP + nano + yotiao
- 4: Q1 + E1-YFP + free Ca

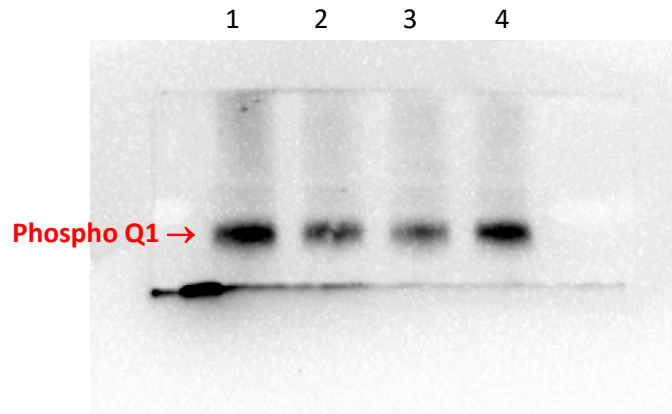

### Figure 2F

#### Anti-actin immunoblot

- 1: Q1 + E1-YFP + nanoCa
- 2: Q1 + E1-YFP + nano
- 3: Q1 + E1-YFP + nano + yotiao
- 4: Q1 + E1-YFP + free Ca

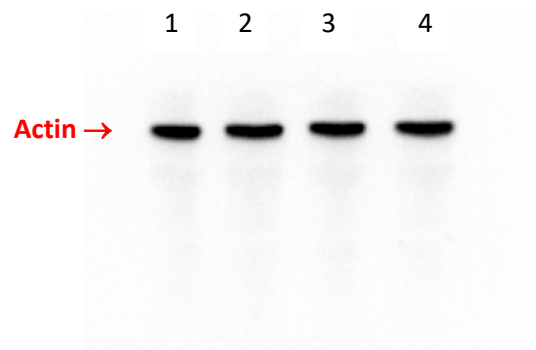

### Figure 2F

#### Anti-Q1 immunoblot

- 1: Q1 + E1-YFP + nanoCa
- 2: Q1 + E1-YFP + nano
- 3: Q1 + E1-YFP + nano + yotiao
- 4: Q1 + E1-YFP + free Ca

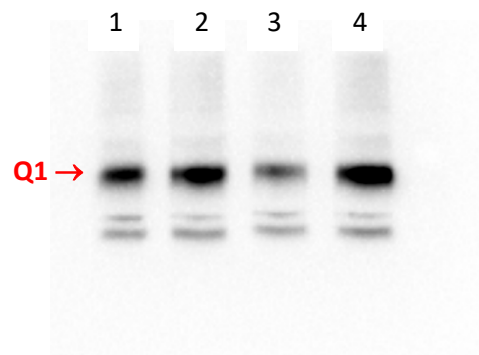

Supplement: supp [file elife-83466-supp-v1.zip]
