# Supplementary material for: Divergent regulation of KCNQ1/E1 by targeted recruitment of protein kinase A to distinct sites on the channel complex
Source: eLife journal article supplement (doi:10.7554/elife.83466), 2023-08-31
Supplement: supp [file Figure 1 - figure supplement 1 - source data 1.xlsx]

## Sheet: Q1 E1 nanoRIIa
Q1+ E1 + nanoRIIa (no cAMP/OA)
Raw Data										Normalized Data
Time	Cell 1	Cell 2	Cell 3	Cell 4	Cell 5	mean	sem			Time	Cell 1	Cell 2	Cell 3	Cell 4	Cell 5	mean	sem
1	129.373	111.971	151.096	72.0617	136.32	120.164	12.1385			1	1	1	1	1	1	1	0
1.25	128.345	126.275	144.596	72.035	136.04	121.458	11.4215			1.25	0.99206	1.12774	0.956981	0.99963	0.997946	1.01487	0.026177
1.5	126.918	131.787	142.506	72.9017	136.58	122.139	11.2492			1.5	0.981027	1.17698	0.943149	1.01166	1.00191	1.02294	0.0360112
1.75	122.345	146.575	121.088	75.8617	131.12	119.398	10.5507			1.75	0.945682	1.30904	0.801398	1.05273	0.961854	1.01414	0.0751361
2	122.555	158.5	113.032	75.9283	124.49	118.901	11.8216			2	0.947298	1.41554	0.748081	1.05366	0.913219	1.01556	0.0996224
2.25	119.318	169.025	109.07	80.1033	118.23	119.149	12.8291			2.25	0.922282	1.50954	0.721859	1.11159	0.867298	1.02651	0.121586
2.5	118.009	178.675	108.88	82.6567	120.52	121.748	14.0711			2.5	0.912164	1.59572	0.720601	1.14703	0.884096	1.05192	0.135976
2.75	113.591	189.363	109.716	82.7117	107.91	120.658	16.1151			2.75	0.878013	1.69117	0.726134	1.14779	0.791593	1.04694	0.157716
3	111.055	199.412	109.918	84.1567	98.193	120.547	18.1624			3	0.858408	1.78093	0.727471	1.16784	0.720313	1.05099	0.178613
3.25	109.882	202.275	111.892	84.0117	76.596	116.931	20.0692			3.25	0.849343	1.80649	0.740536	1.16583	0.561884	1.02482	0.195634
3.5	113.355	210.35	103.566	86.455	71.808	117.107	21.8021			3.5	0.876186	1.87861	0.685432	1.19974	0.526761	1.03334	0.213965
3.75	108.473	210.363	94.594	87.5567	74.49	115.095	21.8606			3.75	0.838451	1.87872	0.626052	1.21502	0.546435	1.02094	0.217977
4	106.355	210.463	85.376	90.07	66.696	111.792	22.7761			4	0.822079	1.87961	0.565045	1.2499	0.489261	1.00118	0.229596
4.25	105.1	213.775	80.906	90.0617	70.135	111.996	23.3294			4.25	0.812381	1.9092	0.535461	1.24979	0.514488	1.00426	0.234577
4.5	102.3	215.287	72.978	90.7067	70.949	110.444	24.0097			4.5	0.790739	1.9227	0.482991	1.25874	0.520459	0.995126	0.241599
4.75	103.445	220.075	71.114	92.1733	63.908	110.143	25.388			4.75	0.799592	1.96546	0.470654	1.27909	0.468809	0.996721	0.253967
5	102.309	220.162	69.3	91.27	65.573	109.723	25.4367			5	0.790809	1.96624	0.458649	1.26655	0.481023	0.992655	0.253816
5.25	101.491	223.637	70.718	93.325	65.396	110.913	25.9171			5.25	0.784485	1.99728	0.468034	1.29507	0.479724	1.00492	0.259355
5.5	100.445	226.6	71.086	96.11	61.112	111.071	26.6671			5.5	0.776404	2.02373	0.470469	1.33372	0.448298	1.01052	0.267852
5.75	99.8818	226.25	70.614	95.115	60.721	110.516	26.6956			5.75	0.772047	2.02061	0.467345	1.31991	0.44543	1.00507	0.267364
6	97.7545	221.188	62.184	97.585	49.7	105.682	27.2			6	0.755604	1.9754	0.411553	1.35419	0.364583	0.972265	0.274427
6.25	96.5727	225.3	57.446	96.3483	51.586	105.451	28.0937			6.25	0.746469	2.01212	0.380195	1.33703	0.378418	0.970847	0.280609
6.5	95.3455	226.425	60.05	100.652	46.828	105.86	28.4654			6.5	0.736983	2.02217	0.397429	1.39674	0.343515	0.979368	0.287287
6.75	94.4091	222.862	59.724	102.52	51.453	106.194	27.51			6.75	0.729745	1.99035	0.395272	1.42267	0.377443	0.983097	0.281733
7	92.4182	221.25	59.408	100.355	62.977	107.282	26.4669			7	0.714356	1.97595	0.39318	1.39263	0.461979	0.987619	0.271674
7.25	93.3	225.45	51.61	100.018	51.598	104.395	28.5449			7.25	0.721172	2.01346	0.341571	1.38795	0.378506	0.968534	0.287763
7.5	93.3182	224.037	54.71	114.463	47.744	106.855	28.4155			7.5	0.721313	2.00085	0.362088	1.58841	0.350235	1.00458	0.300307
7.75	90.5645	221.175	51.488	106.925	54.234	104.877	27.6762			7.75	0.700028	1.97528	0.340763	1.4838	0.397843	0.979543	0.287772
8	87.0755	225.038	53.072	103.155	53.036	104.275	28.3745			8	0.673059	2.00978	0.351247	1.43148	0.389055	0.970924	0.290009
8.25	85.2555	224.625	55.026	101.967	53.461	104.067	28.184			8.25	0.658991	2.0061	0.364179	1.41499	0.392173	0.967286	0.287688
8.5	84.1427	225.637	53.718	103.1	49.101	103.14	28.7953			8.5	0.65039	2.01514	0.355522	1.43072	0.360189	0.962392	0.293659
8.75	84.4091	225.9	52.232	101.757	47.886	102.437	29.0275			8.75	0.652449	2.01748	0.345688	1.41208	0.351276	0.955795	0.294283
9	82.1036	221.912	43.712	103.148	43.957	98.9667	29.3235			9	0.634629	1.98187	0.2893	1.43139	0.322455	0.931929	0.298306
9.25	83.84	224.05	45.378	106.525	51.667	102.292	28.9727			9.25	0.64805	2.00096	0.300326	1.47825	0.379013	0.961319	0.298141
9.5	82.8564	223.15	46.428	106.265	42.855	100.311	29.4171			9.5	0.640447	1.99292	0.307275	1.47464	0.314371	0.945931	0.301715
9.75	80.2682	217.562	45.196	104.622	45.161	98.5619	28.4479			9.75	0.620441	1.94302	0.299121	1.45184	0.331287	0.929141	0.293313
10	80.01	220.4	43.676	107.135	47.024	99.649	28.9309			10	0.618446	1.96836	0.289061	1.48671	0.344953	0.941507	0.299173
10.25	77.7182	217.825	45.568	108.068	38.109	97.4577	29.1241			10.25	0.600731	1.94537	0.301583	1.49966	0.279555	0.92538	0.302111
10.5	77.8127	214.963	44.776	106.64	36.764	96.191	28.7949			10.5	0.601462	1.9198	0.296341	1.47984	0.269689	0.913427	0.298405
10.75	74.4782	216.55	44.228	108.122	34.114	95.4984	29.4288			10.75	0.575687	1.93398	0.292715	1.5004	0.250249	0.910607	0.304971
11	74.09	216.65	43.628	107.103	34.018	95.0979	29.4892			11	0.572686	1.93487	0.288744	1.48627	0.249545	0.906424	0.304521
11.25	75.15	214.688	39.37	107.415	43.27	95.9785	28.7327			11.25	0.58088	1.91734	0.260563	1.4906	0.317415	0.91336	0.298866
11.5	71.31	208.725	40.602	108.413	44.489	94.7079	27.7017			11.5	0.551198	1.86409	0.268717	1.50445	0.326357	0.902964	0.292851
11.75	69.9118	209.088	41.75	109.312	42.296	94.4714	27.9013			11.75	0.540391	1.86733	0.276314	1.51692	0.31027	0.902245	0.295458
12	70.0364	209.188	44.362	107.08	44.975	95.1282	27.4769			12	0.541353	1.86823	0.293601	1.48595	0.329922	0.90381	0.28997
12.25	67.3582	212.75	40.274	110.975	47.452	95.7618	28.3811			12.25	0.520652	1.90004	0.266546	1.54	0.348093	0.915066	0.300554
12.5	67.2091	217.887	42.364	109.878	48.095	97.0868	29.013			12.5	0.5195	1.94592	0.280378	1.52478	0.35281	0.924679	0.303934

## Sheet: Q1 E1 nanoRIIa + cAMP and OA 
Q1+E1+NanoRIIa with cAMP/OA	N=9
Raw Data													Normalized Data
Time	Cell 1	Cell 2	Cell 3	Cell 4	Cell 5	Cell 6	Cell 7	Cell 8	Cell 9	mean	sem		Time	Cell 1	Cell 2	Cell 3	Cell 4	Cell 5	Cell 6	Cell 7	Cell 8	Cell 9	mean	sem
1	38.74	86.796	63.22	70.3733	65.9162	106.867	90.64	121.355	181.167	91.6749	13.0877		1	1	1	1	1	1	1	1	1	1	1	0
1.25	43.6333	86.394	63.845	65.2733	68.8075	108.406	92.6267	118.238	171.156	90.931	11.982		1.25	1.12631	0.995368	1.00989	0.927529	1.04386	1.0144	1.02192	0.974318	0.944741	1.00648	0.0183494
1.5	43.0533	92.616	63.8825	59.8533	64.95	112.006	97.2867	120.148	156.844	90.0711	11.3004		1.5	1.11134	1.06705	1.01048	0.850512	0.985341	1.04809	1.07333	0.990057	0.865747	1.00022	0.0284098
1.75	39.3433	89.238	59.4025	67.05	69.7475	113.061	96.14	116.103	151.322	89.0453	10.7972		1.75	1.01557	1.02813	0.939616	0.952776	1.05812	1.05796	1.06068	0.956725	0.835265	0.989429	0.0236578
2	32.5337	96.732	57.6175	48.2	72.0325	115.289	99.4067	117.958	140.222	86.6658	11.3302		2	0.839795	1.11448	0.911381	0.684919	1.09279	1.07881	1.09672	0.97201	0.773996	0.951655	0.0498023
2.25	48.52	100.226	58.56	57.1133	66.83	117.217	100.713	117.512	137.033	89.3027	10.0935		2.25	1.25245	1.15473	0.926289	0.811576	1.01386	1.09685	1.11114	0.96833	0.756394	1.01018	0.0509112
2.5	31.047	91.03	53.99	54.2067	78.62	117.25	103.187	120.22	130.889	86.7155	10.88		2.5	0.80142	1.04878	0.854002	0.770273	1.19273	1.09716	1.13842	0.990647	0.722478	0.957323	0.0547004
2.75	38.27	97.408	53.91	51.5967	80.8275	114.4	106.487	116.375	129.378	87.628	10.337		2.75	0.987868	1.12226	0.852736	0.733185	1.22622	1.07049	1.17483	0.958963	0.714137	0.982299	0.058295
3	45.8733	84.01	53.7	58.94	86.645	116.411	108.887	115.797	126.811	88.5638	9.51472		3	1.18413	0.967902	0.849415	0.837533	1.31447	1.08931	1.20131	0.954198	0.699969	1.01092	0.0630936
3.25	45.9533	88.924	52.8675	65.2433	76.49	115.444	108.873	113.623	130.267	88.6318	9.48146		3.25	1.1862	1.02452	0.836246	0.927103	1.16041	1.08027	1.20116	0.936289	0.719043	1.00792	0.0524078
3.5	43.56	90.062	52.48	57.9667	79.18	115.05	102.633	114.032	130.744	87.3009	9.72892		3.5	1.12442	1.03763	0.830117	0.823702	1.20122	1.07658	1.13232	0.939654	0.72168	0.98748	0.0521621
3.75	55.39	119.582	53.2425	63.4967	77.855	112.25	103.18	110.527	130.344	91.763	9.27216		3.75	1.42979	1.37774	0.842178	0.902283	1.18112	1.05037	1.13835	0.910771	0.719473	1.06134	0.0761037
4	54.3367	107.324	54.9675	62.1433	86.2425	112.183	101.433	112.385	133.622	91.6264	9.0215		4	1.4026	1.23651	0.869464	0.883052	1.30836	1.04975	1.11908	0.926085	0.737565	1.05916	0.0705635
4.25	54.55	82.848	51.475	58.8133	88.9338	110.817	99.1867	112.382	130.433	87.7154	8.86965		4.25	1.40811	0.954514	0.81422	0.835733	1.34919	1.03696	1.09429	0.926057	0.719963	1.01545	0.0740412
4.5	68.5767	69.818	51.3575	79.7467	60.06	109.044	100.76	111.07	129.833	86.6963	8.44147		4.5	1.77018	0.804392	0.812362	1.13319	0.911156	1.02038	1.11165	0.915249	0.716651	1.02169	0.0986573
4.75	58.7333	75.556	56.815	68.95	74.655	110.272	98.7267	110.25	128.022	86.8867	8.02903		4.75	1.51609	0.870501	0.898687	0.979775	1.13257	1.03187	1.08922	0.908492	0.706654	1.01487	0.0713864
5	66.1167	74.4	54.2175	70.1833	79.9738	109.817	101.733	109.255	124.678	87.8193	7.57535		5	1.70668	0.857182	0.8576	0.9973	1.21326	1.0276	1.12239	0.900293	0.688194	1.04117	0.0925102
5.25	60.8033	75.33	56.08	75.7767	83.4363	107.672	105.207	108.727	122.867	88.4332	7.38364		5.25	1.56952	0.867897	0.887061	1.07678	1.26579	1.00754	1.16071	0.895939	0.678197	1.04549	0.0826078
5.5	70.3133	73.88	58.125	62.6467	86.1388	105.011	103.12	109.733	121.4	87.8187	7.16349		5.5	1.81501	0.851191	0.919408	0.890205	1.30679	0.982637	1.13769	0.904234	0.670101	1.05303	0.106052
5.75	41.0033	72.962	57.6425	74.4633	91.6088	104.744	104.033	109.402	120.3	86.2399	8.28769		5.75	1.05842	0.840615	0.911776	1.05812	1.38977	0.980141	1.14776	0.901501	0.664029	0.994683	0.0644497
6	51.4267		56.91	67.3333	93.0812	103.572	103.327	109.553	118.956	88.0199	8.53057		6	1.32748		0.90019	0.956802	1.41211	0.969172	1.13997	0.902751	0.656608	1.03314	0.0817813
6.25	46.3267			64.4933	90.2737	97.1833	112.18	107.278	117.467	90.7432	9.20367		6.25	1.19584			0.916446	1.36952	0.909389	1.23764	0.884004	0.64839	1.02303	0.0880555
6.5	48.9633			73.9433	95.2812	92.8389	109.94	107.5	118.511	92.4254	8.39501		6.5	1.2639			1.05073	1.44549	0.868736	1.21293	0.885831	0.654155	1.05454	0.0953048
6.75	54.84				96.2362	93.2722	107.327	108.307	120.6	96.7636	8.47062		6.75	1.41559				1.45998	0.872791	1.1841	0.892478	0.665685	1.08177	0.119905
7	49.9533				97.49	88.2222	109.187	105.067	121.922	95.3069	9.29184		7	1.28945				1.479	0.825535	1.20462	0.865779	0.672984	1.05623	0.116847
7.25	43.2533				96.3862	86.2722	106.873	106.11	122.522	93.5696	10.2272		7.25	1.1165				1.46225	0.807288	1.1791	0.874377	0.676296	1.0193	0.107341
7.5	44.7967				95.3212	82.3444	105.04	106.882	114.611	91.4992	9.47757		7.5	1.15634				1.4461	0.770534	1.15887	0.880736	0.632628	1.00753	0.111826
7.75	21.8867				98.0812	78.25	106.74	104.263	112.633	86.9758	12.6753		7.75	0.564963				1.48797	0.732221	1.17763	0.85916	0.621711	0.907275	0.133539
8	29.9757				97.89	77.0222	107.627	104.472	108.311	87.5496	11.3688		8	0.773765				1.48507	0.720732	1.18741	0.860876	0.597853	0.937617	0.124422
8.25	29.6463				98.845	73.6889	108.093	105.012	102.824	86.3516	11.3335		8.25	0.765264				1.49955	0.68954	1.19256	0.865326	0.567568	0.929968	0.130578
8.5	27.9717				98.2287	67.9611	111.36	103.91	101.43	85.1436	11.8319		8.5	0.722036				1.49021	0.635943	1.2286	0.856248	0.559871	0.915483	0.136817
8.75	22.1387				117.012	66.5111	113.38	105.653	98.5822	87.213	13.6476		8.75	0.571468				1.77517	0.622375	1.25088	0.870614	0.544152	0.93911	0.181992
9	24.1933				106.446	63.0111	112.693	102.752	99.5922	84.7813	12.8405		9	0.624505				1.61487	0.589624	1.24331	0.846703	0.549727	0.911456	0.160371
9.25	27.0723				103.207	57.3278	116.107	105.468	93.1211	83.7173	12.7971		9.25	0.698821				1.56574	0.536442	1.28096	0.869089	0.514008	0.910844	0.15901
9.5	26.4723				105.718	53.8667	117.58	103.917	91.9389	83.2487	13.2004		9.5	0.683333				1.60382	0.504055	1.29722	0.856303	0.507482	0.908701	0.167695
9.75	23.537				99.9663	49.8678	120.44	104.578	91.8933	81.7138	13.8022		9.75	0.607563				1.51656	0.466635	1.32877	0.861755	0.507231	0.88142	0.165913
10	25.689				106.13	47.0861	123.747	103.51	91.2111	82.8955	14.1987		10	0.663113				1.61007	0.440606	1.36525	0.852952	0.503465	0.905911	0.178502
10.25	28.641				98.9875	44.0744	127.38	102.355	89.4844	81.8204	14.0471		10.25	0.739313				1.50172	0.412425	1.40534	0.843435	0.493934	0.89936	0.170707
10.5	25.5027				97.1887	41.8183	125.673	103.275	88.4467	80.3175	14.3583		10.5	0.658303				1.47443	0.391313	1.38651	0.851016	0.488206	0.874963	0.170949
10.75	23.3807				94.5337	39.9761	128.52	102.425	86.95	79.2976	14.8336		10.75	0.603528				1.43415	0.374075	1.41792	0.844011	0.479945	0.858938	0.173806
11	27.9533				97.6663	35.6406	130.14	100.568	88.6389	80.1012	14.9075		11	0.721563				1.48167	0.333505	1.43579	0.828712	0.489267	0.881751	0.178727
11.25	24.6647				93.1575	34.9728	131.08	104.867	85.11	78.9753	15.3749		11.25	0.636672				1.41327	0.327256	1.44616	0.864131	0.469788	0.859547	0.177613
11.5	21.2313				94.3937	33.5906	131.707	101.982	89.4822	78.731	15.8568		11.5	0.548047				1.43203	0.314322	1.45307	0.840358	0.493922	0.846958	0.183137
11.75	25.583				91.7213	32.7122	133.06	102.92	86.18	78.6961	15.5487		11.75	0.660377				1.39148	0.306103	1.46801	0.84809	0.475695	0.858292	0.178466
12	30.3213					30.4783	135.48	100.92	87.18	76.8759	18.3726		12	0.782688					0.2852	1.4947	0.83161	0.481214	0.775083	0.184114
