# Supplementary material for: Divergent regulation of KCNQ1/E1 by targeted recruitment of protein kinase A to distinct sites on the channel complex
Source: eLife journal article supplement (doi:10.7554/elife.83466), 2023-08-31
Supplement: supp [file Figure 2 - figure supplement 2 - source data 1.xlsx]

## Sheet: hTASK1-GFP
								Control current at 0 mV													Control current at 0 mV
	Constructs		Date	rig	Pulse	Filename	Cap	Current(pA)	Density(pA/pF)	Traces	Conment			Constructs		Date	rig	Pulse	Filename	Cap	Current(pA)	Density(pA/pF)	Traces	Conment
	hTASK1-GFP+Nano control		2018-07-26	XLZ	-120 to 30 ramp	2018_07_26_0001	23	2623.9	114.083	t2				hTASK1-GFP+Nano-PKA-Cα		2018-07-26	XLZ	-120 to 30 ramp	2018_07_26_0014	31	3012.7	97.1839	t13
			2018-07-26	XLZ	-120 to 30 ramp	2018_07_26_0002	25	2207	88.28	t10						2018-07-26	XLZ	-120 to 30 ramp	2018_07_26_0017	41	4555.1	111.1	t1
			2018-07-26	XLZ	-120 to 30 ramp	2018_07_26_0003	18	2329.7	129.428	t21						2018-07-26	XLZ	-120 to 30 ramp	2018_07_26_0019	16	1814	113.375	t11
			2018-07-26	XLZ	-120 to 30 ramp	2018_07_26_0005	24	2635.5	109.812	t9						2018-07-26	XLZ	-120 to 30 ramp	2018_07_26_0023	34	1186.5	34.8971	t8
			2018-07-26	XLZ	-120 to 30 ramp	2018_07_26_0007	25	2170	86.8	t9						2018-07-26	XLZ	-120 to 30 ramp	2018_07_26_0025	17	1155.4	67.9647	t11
			2018-07-26	XLZ	-120 to 30 ramp	2018_07_26_0009	30	4114.4	137.147	t9						2018-07-26	XLZ	-120 to 30 ramp	2018_07_26_0027	45	8900.8	197.796	t16
			2018-07-26	XLZ	-120 to 30 ramp	2018_07_26_0011	34	2186.9	64.3206	t17						2018-07-26	XLZ	-120 to 30 ramp	2018_07_26_0029	52	6692.5	128.702	t8
																2018-07-26	XLZ	-120 to 30 ramp	2018_07_26_0030	32	4524.5	141.391	t35
																2018-07-26	XLZ	-120 to 30 ramp	2018_07_26_0033	15.8	3604.7	228.146	t10
						Average	25.5714	2609.63	104.267
						SEM	1.93781	261.755	9.75611										Average	31.5333	3938.47	124.506
																			SEM	4.40404	863.887	19.9625
																				p value	0.381198
