# Supplementary material for: Divergent regulation of KCNQ1/E1 by targeted recruitment of protein kinase A to distinct sites on the channel complex
Source: eLife journal article supplement (doi:10.7554/elife.83466), 2023-08-31
Supplement: supp [file Figure 2 - source data 1.xlsx]

## Sheet: Figure 2C
		Q1+E1-YFP+pcDNA	Voltage	Cell 1	Cell 2	Cell 3	Cell 4	Cell 5	Cell 6	Cell 7	Cell 8	Cell 9	Cell 10	Cell 11	Cell 12	Cell 13	Average	SEM
			-40	0	0	0	0	0	0	0	0	0	0	0	0	0	0	0
			-20	0.0412441	0.0356199	-0.00769181	0.000646277	0.0301618	0.0443448	0.0512949	0.00488707	0.0139612	0.0553897	0.0584842	0.0401669	0.0371383	0.0312036	0.00598019
			0	0.151981	0.194255	0.0812371	0.0231388	0.11906	0.180137	0.187034	0.0196017	0.096221	0.219974	0.218242	0.189228	0.154064	0.14109	0.0189456
			20	0.348056	0.444737	0.224056	0.0929361	0.302188	0.373695	0.370099	0.076686	0.292469	0.447002	0.474193	0.408873	0.359278	0.324175	0.0350731
			40	0.578153	0.705569	0.446047	0.234687	0.516625	0.565694	0.553292	0.275062	0.540828	0.678418	0.696301	0.655133	0.592686	0.541423	0.040988
			60	0.76545	0.866402	0.660306	0.464104	0.731018	0.753184	0.731822	0.504929	0.734421	0.83751	0.869051	0.832968	0.786711	0.733683	0.0350068
			80	0.915905	0.970498	0.842511	0.718435	0.895528	0.880662	0.88037	0.801049	0.891383	0.953464	0.961179	0.934626	0.925328	0.890072	0.0194967
			100	1	1	1	1	1	1	1	1	1	1	1	1	1	1	0		mean	sem
			v1/2	33.9078	24.8555	45.3029	61.2798	38.4153	33.7635	34.5383	57.6952	38.2399	25.3891	23.6217	28.0069	32.663	36.7445	3.27822		34.5134	3.60015
		Q1+E1-YFP+free Calpha	Voltage	Cell 1	Cell 2	Cell 3	Cell 4	Cell 5	Cell 6	Cell 7	Cell 8	Cell 9	Cell 10	Cell 11	Cell 12	Cell 13	Average	SEM
			-40	0	0	0	0	0	0	0	0	0	0	0	0	0	0	0
			-20	0.042859	0.0542897	0.0613556	0.09538	0.0308209	0.0180578	0.000494333	0.126128	0.0884081	0.0700365	0.0283828	0.0426022	0.076437	0.0565578	0.00961788
			0	0.197783	0.231093	0.213648	0.313414	0.14359	0.0959988	0.0462694	0.349788	0.287063	0.250795	0.16602	0.169841	0.272593	0.210607	0.0240352
			20	0.440839	0.474597	0.419288	0.530607	0.339972	0.27827	0.210343	0.554669	0.557119	0.500692	0.430486	0.406906	0.549007	0.437907	0.0302025
			40	0.686003	0.655284	0.585662	0.733617	0.561571	0.52154	0.433237	0.730335	0.790151	0.685852	0.710895	0.667703	0.793961	0.658139	0.0294207
			60	0.862122	0.819308	0.743816	0.860432	0.762003	0.726316	0.681679	0.867912	0.936499	0.860204	0.893446	0.851948	0.932892	0.83066	0.0220217
			80	0.968341	0.95614	0.892388	0.938688	0.892406	0.895961	0.88068	0.949141	0.996087	0.956699	0.960538	0.969627	0.998505	0.942708	0.0110914
			100	1	1	1	1	1	1	1	1	1	1	1	1	1	1	0		mean	sem
			v1/2	25.4326	25.2677	31.2184	18.8141	35.1209	39.273	45.142	16.7159	16.3947	22.4836	25.3599	27.5173	17.0387	26.5984	2.4996		24.9918	2.68747
																	p value	0.0214223

## Sheet: Figure 2D
		Q1+E1-YFP+Yotiao+Nano control		File	Decay 1/2 (ms)		Q1 WT+E1-YFP+Yotiao+ free Calpha		File	Decay 1/2 (ms)		Q1-S27A+E1-YFP+Yotiao+free Calpha		File	Decay 1/2 (ms)
			Cell 1	2018_02_08_0001	1179.65			Cell 1	2017_11_22_0036	640.718			Cell 1	2017_11_22_0002	1177.54
			Cell 2	2018_02_08_0003	1489.74			Cell 2	2017_11_22_0048	618.347			Cell 2	2017_11_22_0005	713.953
			Cell 3	2018_02_08_0006	981.009			Cell 3	2017_11_22_0054	1113.29			Cell 3	2017_11_22_0009	797.441
			Cell 4	2018_02_08_0009	1179.09			Cell 4	2017_11_22_0057	1610.97			Cell 4	2017_11_22_0022	1309.69
			Cell 5	2018_02_08_0034	1042.89			Cell 5	2017_11_22_0064	1108.36			Cell 5	2017_11_22_0026	836.144
			Cell 6	2018_02_08_0036	1293.17			Cell 6	2017_11_22_0080	1333.51			Cell 6	2017_11_22_0032	838.297
			Cell 7	2018_02_09_0000	345.535			Cell 7	2017_11_29_0002	3240.3			Cell 7	2017_11_29_0023	277.97
			Cell 8	2018_02_09_0003	1594.62			Cell 8	2017_11_29_0006	279.637			Cell 8	2017_11_29_0029	571.252
			Cell 9	2018_02_09_0005	1551.38			Cell 9	2017_11_29_0014	1099.5			Cell 9	2017_11_29_0034	738.498
			Cell 10	2018_02_09_0009	1314.69			Cell 10	2017_11_29_0019	1222.71			Cell 10	2017_11_29_0038	948.079
			Cell 11	2018_02_09_0012	1814.79			Cell 11	2017_12_06_0003	1219.29			Cell 11	2017_12_06_0026	663.104
			Cell 12	2018_02_09_0016	771.145			Cell 12	2017_12_06_0006	1249.04			Cell 12	2017_12_06_0031	770.384
			Cell 13	2018_02_13_0018	646.508			Cell 13	2017_12_06_0012	389.723			Cell 13	2017_12_06_0034	610.013
			Cell 14	2018_02_13_0021	408.28			Cell 14	2017_12_06_0015	2794.2			Cell 14	2017_12_06_0040	1216.44
			Cell 15	2018_02_13_0025	377.413			Cell 15	2017_12_06_0020	2127.91			Cell 15	2017_12_06_0045	883.485
			Cell 16	2018_02_13_0029	810.32				Average	1336.5				Average	823.486
			Cell 17	2018_02_13_0031	407.599				SEM	214.438				SEM	68.6914
				Average	1012.23											P value	0.0360348
				SEM	114.092											one way anova	0.053216

## Sheet: Figure 2G
	Q1+E1-YFP+Nano	Voltage	Cell 1	Cell 2	Cell 3	Cell 4	Cell 5	Cell 6	Cell 7	Cell 8	Cell 9	Cell 10	Average	SEM
		-40	0	0	0	0	0	0	0	0	0	0	0	0
		-20	0.0186387	0.0221006	0.0636369	0.0161921	0.063172	0.0230684	0.0231342	0.0168645	0.131485	0.00946036	0.0387753	0.011941
		0	0.0727561	0.121261	0.24667	0.0496055	0.202791	0.108707	0.109878	0.0786262	0.314226	0.063336	0.136786	0.027918
		20	0.220811	0.317828	0.512377	0.171031	0.399001	0.276251	0.292183	0.223044	0.52509	0.208496	0.314611	0.0396622
		40	0.453679	0.578132	0.739104	0.338975	0.617283	0.535037	0.515423	0.454362	0.80373	0.390153	0.542588	0.0465277
		60	0.692941	0.789856	0.897769	0.595184	0.818155	0.74512	0.743547	0.690737	0.904025	0.590736	0.746807	0.0346181
		80	0.86135	0.918396	0.949484	0.821585	0.946946	0.906032	0.905705	0.887283	0.980817	0.826765	0.900436	0.0165856
		100	1	1	1	1	1	1	1	1	1	1	1	0		mean	sem
		V1/2	44.0208	34.7148	20.5037	51.6565	29.0829	38.2146	38.4529	43.6365	18.6559	49.49	36.8428	3.5653		34.0697	4.43041
	Q1+E1-YFP+nano-Calpha	Voltage	Cell 1	Cell 2	Cell 3	Cell 4	Cell 5	Cell 6	Cell 7	Cell 8	Cell 9	Cell 10	Average	SEM
		-40	0	0	0	0	0	0	0	0	0	0	0	0
		-20	0.105919	0.0600853	0.0335896	0.0207008	0.0260669	0.132309	0.0571575	0.0961524	0.0345287	0.113758	0.0680267	0.0128841
		0	0.324864	0.22143	0.151692	0.073623	0.140556	0.366733	0.201943	0.215372	0.149082	0.323043	0.216834	0.029968
		20	0.596611	0.44606	0.381161	0.223369	0.341387	0.586726	0.457441	0.399908	0.344207	0.554776	0.433165	0.0380061
		40	0.805728	0.649293	0.644309	0.454751	0.557997	0.775179	0.680346	0.622393	0.562242	0.752568	0.650481	0.0343904
		60	0.949755	0.832155	0.839332	0.666233	0.738723	0.895088	0.864674	0.794283	0.769308	0.892237	0.824179	0.0265657
		80	1.00214	0.930176	0.957033	0.876346	0.882445	0.951029	0.947433	0.904834	0.916296	0.978357	0.934609	0.0128102
		100	1	1	1	1	1	1	1	1	1	1	1	0
		V1/2	18.7033	26.3948	29.4845	42.4001	35.8914	13.8562	24.9907	29.1645	34.4873	16.5721	27.1945	2.86259		25.1668	3.41148
												P value	0.0497864

## Sheet: Figure 2H
						Control current at +60 mV											Control current at +60 mV
Constructs		Date	Pulse	Filename	Cap	Current(pA)	Density(pA/pF)	Traces			Constructs		Date	Pulse	Filename	Cap	Current(pA)	Density(pA/pF)	Traces
Q1+E1-YFP+Nano		2017-11-03	-70 to 60 ramp	2017_11_03_0037	13	3858	296.769	t8-9			Q1+E1-YFP+Nano-Cα		2017-10-06	-70 to 60 ramp	2017_10_06_0003	28	5468.7	195.311	1…2
		2017-11-03	-70 to 60 ramp	2017_11_03_0040	32	7613.5	237.922	t13-16					2017-10-06	-70 to 60 ramp	2017_10_06_0004	25	7049.7	281.988	t12…t14
		2017-11-03	-70 to 60 ramp	2017_11_03_0044	18	6711.4	372.856	t19-20					2017-10-06	-70 to 60 ramp	2017_10_06_0008	23	4921.9	213.996	t7..t10
		2017-11-03	-70 to 60 ramp	2017_11_03_0050	38.7	2418.2	62.4858	t7-8					2017-10-06	-70 to 60 ramp	2017_10_06_0011	35	4839.2	138.263	t2-t3
		2017-11-03	-70 to 60 ramp	2017_11_03_0051	18	2116.1	117.561	t12					2017-11-03	-70 to 60 ramp	2017_11_03_0000	14	6115.1	436.793	t12
		2017-11-03	-70 to 60 ramp	2017_11_03_0057	43	9346.3	217.356	t7					2017-11-03	-70 to 60 ramp	2017_11_03_0002	25	10068.4	402.736	t9-10
		2017-11-07	-70 to 60 ramp	2017_11_07_0054	39	11309.8	289.995	t10-13					2017-11-03	-70 to 60 ramp	2017_11_03_0004	23	12811.3	557.013	t13
		2017-11-07	-70 to 60 ramp	2017_11_07_0061	65	12634	194.369	sweet8					2017-11-03	-70 to 60 ramp	2017_11_03_0006	24	5057.7	210.737	t7-9
		2017-11-07	-70 to 60 ramp	2017_11_07_0063	16	7487.8	467.988	t12					2017-11-03	-70 to 60 ramp	2017_11_03_0010	23	12335.2	536.313	t11-12
		2017-11-07	-70 to 60 ramp	2017_11_07_0072	70	13965	199.5	t1					2017-11-07	-70 to 60 ramp	2017_11_07_0026	36	8381.3	232.814	t1
		2017-11-07	-70 to 60 ramp	2017_11_07_0076	28	2690.4	96.0857	t6					2017-11-07	-70 to 60 ramp	2017_11_07_0030	57.42	10550.5	183.743	t12
													2017-11-07	-70 to 60 ramp	2017_11_07_0033	40	2048.3	51.2075	t8
				Average	34.6091	7286.41	232.081						2017-11-07	-70 to 60 ramp	2017_11_07_0035	50	5957	119.14	t15-16
				SEM	5.79813	1270	36.4461						2017-11-07	-70 to 60 ramp	2017_11_07_0044	25	3080.4	123.216	t5-6
													2017-11-07	-70 to 60 ramp	2017_11_07_0046	24	7147.2	297.8	t10-11
													2017-11-07	-70 to 60 ramp	2017_11_07_0051	23	6782.8	294.904	t10
															Average	29.7138	7038.42	267.248
															SEM	2.82441	772.094	37.1221
																	p value	0.505454

## Sheet: Figure 2J
	Q1-YFP+E1+nano-Calpha	Time	Current			Q1-YFP+E1+nano-Calpha[T198A]	Time	Current
		0	-6.71387				0	10.376
		0.5	-7.93457				0.5	9.15527
		1	-7.93457				1	9.76563
		1.5	-6.71387				1.5	6.10352
		2	-6.71387				2	7.32422
		2.5	-7.93457				2.5	7.32422
		3	-7.93457				3	6.71387
		3.5	-9.15527				3.5	6.71387
		4	-8.54492				4	7.93457
		4.5	-8.54492				4.5	7.93457
		5	-10.376				5	7.93457
		5.5	-9.15527				5.5	6.10352
		6	-8.54492				6	6.10352
		6.5	-9.15527				6.5	6.71387
		7	-8.54492				7	9.15527
		7.5	-6.71387				7.5	7.93457
		8	-7.93457				8	8.54492
		8.5	-7.32422				8.5	8.54492
		9	-7.93457				9	9.15527
		9.5	-7.32422				9.5	7.32422
		10	-9.15527				10	9.15527
		10.5	-7.93457				10.5	7.93457
		11	-9.15527				11	7.93457
		11.5	-7.32422				11.5	6.10352
		12	-6.10352				12	8.54492
		12.5	-7.32422				12.5	6.71387
		13	-7.32422				13	9.15527
		13.5	-9.15527				13.5	10.9863
		14	-8.54492				14	7.93457
		14.5	-6.71387				14.5	9.15527
		15	-7.32422				15	10.376
		15.5	-7.93457				15.5	9.15527
		16	-9.15527				16	12.207
		16.5	-6.71387				16.5	9.76563
		17	-7.93457				17	10.9863
		17.5	-6.71387				17.5	9.76563
		18	-6.71387				18	7.93457
		18.5	-9.76563				18.5	8.54492
		19	-9.76563				19	8.54492
		19.5	-7.93457				19.5	9.76563
		20	-7.93457				20	7.93457
		20.5	-8.54492				20.5	7.93457
		21	-6.10352				21	8.54492
		21.5	-8.54492				21.5	9.15527
		22	-8.54492				22	9.15527
		22.5	-7.93457				22.5	7.32422
		23	-7.32422				23	9.76563
		23.5	-9.76563				23.5	9.76563
		24	-9.76563				24	9.15527
		24.5	-8.54492				24.5	8.54492
		25	-7.93457				25	9.15527
		25.5	-9.15527				25.5	9.76563
		26	-12.207				26	8.54492
		26.5	-10.376				26.5	10.376
		27	-7.93457				27	9.15527
		27.5	-7.93457				27.5	10.9863
		28	-7.32422				28	9.76563
		28.5	-10.376				28.5	7.93457
		29	-9.15527				29	9.15527
		29.5	-6.71387				29.5	9.15527
		30	-8.54492				30	9.15527
		30.5	-9.76563				30.5	10.376
		31	-9.15527				31	9.76563
		31.5	-7.32422				31.5	12.207
		32	-7.93457				32	9.76563
		32.5	-7.32422				32.5	9.15527
		33	-7.93457				33	10.9863
		33.5	-9.76563				33.5	10.376
		34	-9.76563				34	7.93457
		34.5	-10.376				34.5	9.15527
		35	-7.93457				35	9.15527
		35.5	-7.32422				35.5	10.376
		36	-7.32422				36	8.54492
		36.5	-9.15527				36.5	9.76563
		37	-9.76563				37	11.5967
		37.5	-7.93457				37.5	10.9863
		38	-7.93457				38	8.54492
		38.5	-7.32422				38.5	9.15527
		39	-10.9863				39	9.76563
		39.5	-7.93457				39.5	7.93457
		40	-7.93457				40	9.76563
		40.5	-8.54492				40.5	12.207
		41	-9.76563				41	9.76563
		41.5	-9.15527				41.5	9.76563
		42	-7.93457				42	10.9863
		42.5	-8.54492				42.5	7.93457
		43	-4.88281				43	9.76563
		43.5	-6.71387				43.5	10.9863
		44	-7.32422				44	10.9863
		44.5	-8.54492				44.5	8.54492
		45	-9.76563				45	10.376
		45.5	-11.5967				45.5	8.54492
		46	-9.76563				46	11.5967
		46.5	-7.93457				46.5	9.76563
		47	-7.93457				47	7.93457
		47.5	-9.76563				47.5	7.32422
		48	-7.93457				48	9.76563
		48.5	-7.93457				48.5	8.54492
		49	-8.54492				49	8.54492
		49.5	-10.376				49.5	9.76563
		50	-10.9863				50	9.76563
		50.5	-9.15527				50.5	7.93457
		51	-10.9863				51	9.76563
		51.5	-10.9863				51.5	8.54492
		52	-9.76563				52	10.9863
		52.5	-10.376				52.5	10.376
		53	-11.5967				53	8.54492
		53.5	-10.9863				53.5	8.54492
		54	-9.76563				54	10.376
		54.5	-9.15527				54.5	7.32422
		55	-8.54492				55	11.5967
		55.5	-9.76563				55.5	10.9863
		56	-8.54492				56	10.376
		56.5	-9.15527				56.5	9.15527
		57	-10.376				57	10.376
		57.5	-9.15527				57.5	9.76563
		58	-9.76563				58	8.54492
		58.5	-9.15527				58.5	8.54492
		59	-9.76563				59	7.32422
		59.5	-10.376				59.5	8.54492
		60	-9.76563				60	8.54492
		60.5	-8.54492				60.5	9.76563
		61	-10.376				61	7.93457
		61.5	-8.54492				61.5	9.15527
		62	-10.376				62	9.76563
		62.5	-11.5967				62.5	5.49316
		63	-12.207				63	7.32422
		63.5	-12.8174				63.5	8.54492
		64	-11.5967				64	6.71387
		64.5	-11.5967				64.5	6.71387
		65	-10.376				65	7.32422
		65.5	-11.5967				65.5	6.71387
		66	-12.207				66	6.10352
		66.5	-10.376				66.5	5.49316
		67	-10.376				67	6.71387
		67.5	-9.15527				67.5	7.32422
		68	-10.376				68	3.66211
		68.5	-10.376				68.5	6.71387
		69	-9.76563				69	4.88281
		69.5	-9.15527				69.5	6.71387
		70	-10.376				70	6.10352
		70.5	-9.76563				70.5	4.88281
		71	-9.15527				71	5.49316
		71.5	-9.76563				71.5	6.10352
		72	-9.15527				72	3.66211
		72.5	-10.376				72.5	0.61035
		73	-7.32422				73	6.71387
		73.5	-10.376				73.5	7.32422
		74	-9.76563				74	6.71387
		74.5	-9.15527				74.5	6.10352
		75	-8.54492				75	3.66211
		75.5	-7.93457				75.5	4.88281
		76	-7.93457				76	6.71387
		76.5	-7.93457				76.5	6.10352
		77	-6.71387				77	6.71387
		77.5	-7.93457				77.5	6.71387
		78	-7.93457				78	6.10352
		78.5	-7.93457				78.5	7.32422
		79	-8.54492				79	7.32422
		79.5	-8.54492				79.5	5.49316
		80	-7.32422				80	7.32422
		80.5	-7.32422				80.5	6.10352
		81	-9.15527				81	4.88281
		81.5	-7.93457				81.5	6.10352
		82	-7.32422				82	4.27246
		82.5	-9.76563				82.5	6.71387
		83	-9.15527				83	5.49316
		83.5	-9.15527				83.5	9.76563
		84	-7.93457				84	6.71387
		84.5	-9.76563				84.5	7.93457
		85	-7.93457				85	7.93457
		85.5	-9.15527				85.5	10.376
		86	-9.76563				86	7.32422
		86.5	-12.207				86.5	10.376
		87	-12.207				87	7.32422
		87.5	-12.207				87.5	7.32422
		88	-9.76563				88	6.71387
		88.5	-9.15527				88.5	7.32422
		89	-8.54492				89	7.32422
		89.5	-9.15527				89.5	7.93457
		90	-8.54492				90	9.15527
		90.5	-9.76563				90.5	8.54492
		91	-10.376				91	8.54492
		91.5	-9.76563				91.5	7.32422
		92	-9.15527				92	10.9863
		92.5	-10.376				92.5	7.32422
		93	-9.15527				93	8.54492
		93.5	-10.376				93.5	6.10352
		94	-12.207				94	9.76563
		94.5	-11.5967				94.5	6.71387
		95	-9.15527				95	6.71387
		95.5	-9.76563				95.5	8.54492
		96	-10.376				96	9.15527
		96.5	-8.54492				96.5	7.32422
		97	-9.76563				97	10.376
		97.5	-7.93457				97.5	9.76563
		98	-7.93457				98	6.10352
		98.5	-8.54492				98.5	7.32422
		99	-8.54492				99	6.71387
		99.5	-10.9863				99.5	6.71387
		100	-9.15527				100	6.71387
		100.5	-7.93457				100.5	9.15527
		101	-10.376				101	6.10352
		101.5	-10.376				101.5	6.71387
		102	-10.9863				102	9.76563
		102.5	-10.9863				102.5	10.376
		103	-12.207				103	6.10352
		103.5	-8.54492				103.5	6.71387
		104	-9.76563				104	9.15527
		104.5	-9.15527				104.5	5.49316
		105	-10.376				105	7.93457
		105.5	-10.376				105.5	7.32422
		106	-7.32422				106	9.15527
		106.5	-7.32422				106.5	8.54492
		107	-7.93457				107	8.54492
		107.5	-9.76563				107.5	9.15527
		108	-10.376				108	8.54492
		108.5	-9.76563				108.5	10.9863
		109	-9.76563				109	10.376
		109.5	-10.376				109.5	9.76563
		110	-7.93457				110	9.76563
		110.5	-7.93457				110.5	9.76563
		111	-7.93457				111	7.93457
		111.5	-9.15527				111.5	7.32422
		112	-9.76563				112	7.32422
		112.5	-9.15527				112.5	8.54492
		113	-7.32422				113	7.32422
		113.5	-8.54492				113.5	7.93457
		114	-9.15527				114	8.54492
		114.5	-9.15527				114.5	6.71387
		115	-9.15527				115	6.10352
		115.5	-9.15527				115.5	7.93457
		116	-9.76563				116	9.15527
		116.5	-9.76563				116.5	9.15527
		117	-12.207				117	8.54492
		117.5	-8.54492				117.5	9.15527
		118	-11.5967				118	7.93457
		118.5	-9.15527				118.5	9.15527
		119	-12.207				119	7.32422
		119.5	-9.15527				119.5	9.76563
		120	-9.15527				120	7.93457
		120.5	-8.54492				120.5	8.54492
		121	-8.54492				121	8.54492
		121.5	-7.93457				121.5	10.9863
		122	-7.93457				122	9.76563
		122.5	-10.376				122.5	9.15527
		123	-9.15527				123	9.76563
		123.5	-7.93457				123.5	6.10352
		124	-8.54492				124	9.15527
		124.5	-8.54492				124.5	8.54492
		125	-9.76563				125	7.32422
		125.5	-10.376				125.5	9.15527
		126	-9.15527				126	7.32422
		126.5	-7.93457				126.5	7.32422
		127	-10.376				127	6.71387
		127.5	-10.376				127.5	10.376
		128	-9.76563				128	7.93457
		128.5	-10.376				128.5	10.9863
		129	-9.15527				129	6.71387
		129.5	-9.15527				129.5	6.10352
		130	-7.93457				130	10.9863
		130.5	-6.10352				130.5	9.15527
		131	-7.93457				131	9.15527
		131.5	-9.76563				131.5	8.54492
		132	-7.93457				132	9.15527
		132.5	-8.54492				132.5	10.376
		133	-9.15527				133	8.54492
		133.5	-6.10352				133.5	10.376
		134	-7.93457				134	9.15527
		134.5	-7.32422				134.5	9.76563
		135	-6.71387				135	8.54492
		135.5	-6.10352				135.5	10.376
		136	-6.71387				136	9.15527
		136.5	-6.71387				136.5	7.93457
		137	-6.71387				137	7.32422
		137.5	-6.71387				137.5	5.49316
		138	-5.49316				138	10.376
		138.5	-7.32422				138.5	7.32422
		139	-8.54492				139	9.76563
		139.5	-10.376				139.5	5.49316
		140	-7.32422				140	7.32422
		140.5	-9.15527				140.5	6.71387
		141	-7.32422				141	7.32422
		141.5	-8.54492				141.5	10.376
		142	-7.93457				142	6.71387
		142.5	-7.93457				142.5	6.71387
		143	-7.93457				143	10.376
		143.5	-7.32422				143.5	8.54492
		144	-8.54492				144	10.376
		144.5	-7.93457				144.5	6.71387
		145	-8.54492				145	10.376
		145.5	-9.15527				145.5	8.54492
		146	-10.376				146	11.5967
		146.5	-9.15527				146.5	9.15527
		147	-8.54492				147	8.54492
		147.5	-8.54492				147.5	7.32422
		148	-7.93457				148	10.376
		148.5	-8.54492				148.5	4.88281
		149	-9.15527				149	4.27246
		149.5	-9.76563				149.5	4.88281
		150	-9.15527				150	6.71387
		150.5	-10.9863				150.5	6.10352
		151	-9.15527				151	6.10352
		151.5	-9.15527				151.5	6.10352
		152	-8.54492				152	6.71387
		152.5	-9.76563				152.5	7.32422
		153	-9.15527				153	6.10352
		153.5	-8.54492				153.5	7.93457
		154	-8.54492				154	9.15527
		154.5	-7.93457				154.5	9.15527
		155	-9.15527				155	7.32422
		155.5	-9.15527				155.5	6.71387
		156	-9.15527				156	6.71387
		156.5	-8.54492				156.5	6.10352
		157	-7.93457				157	4.88281
		157.5	-7.93457				157.5	5.49316
		158	-7.93457				158	4.27246
		158.5	-9.15527				158.5	4.88281
		159	-7.32422				159	7.93457
		159.5	-6.71387				159.5	6.71387
		160	-7.93457				160	7.32422
		160.5	-8.54492				160.5	5.49316
		161	-9.15527				161	7.93457
		161.5	-7.32422				161.5	7.32422
		162	-8.54492				162	7.93457
		162.5	-9.15527				162.5	6.71387
		163	-6.71387				163	8.54492
		163.5	-7.93457				163.5	6.10352
		164	-9.15527				164	7.93457
		164.5	-9.76563				164.5	7.93457
		165	-9.15527				165	3.66211
		165.5	-10.376				165.5	4.27246
		166	-9.15527				166	6.71387
		166.5	-9.15527				166.5	6.71387
		167	-8.54492				167	8.54492
		167.5	-8.54492				167.5	7.32422
		168	-9.15527				168	7.32422
		168.5	-7.32422				168.5	6.10352
		169	-9.76563				169	9.15527
		169.5	-8.54492				169.5	9.15527
		170	-9.76563				170	7.32422
		170.5	-7.32422				170.5	8.54492
		171	-8.54492				171	10.9863
		171.5	-8.54492				171.5	10.9863
		172	-8.54492				172	11.5967
		172.5	-7.93457				172.5	8.54492
		173	-8.54492				173	9.15527
		173.5	-8.54492				173.5	7.32422
		174	-9.15527				174	9.76563
		174.5	-9.76563				174.5	7.93457
		175	-12.207				175	7.32422
		175.5	-10.9863				175.5	9.76563
		176	-11.5967				176	9.76563
		176.5	-9.76563				176.5	12.8174
		177	-8.54492				177	6.71387
		177.5	-10.376				177.5	9.15527
		178	-8.54492				178	10.376
		178.5	-8.54492				178.5	9.76563
		179	-8.54492				179	10.9863
		179.5	-8.54492				179.5	9.15527
		180	-7.32422				180	8.54492
		180.5	-8.54492				180.5	10.376
		181	-9.15527				181	9.76563
		181.5	-9.76563				181.5	7.93457
		182	-9.15527				182	9.15527
		182.5	-9.15527				182.5	6.71387
		183	-9.15527				183	7.93457
		183.5	-8.54492				183.5	8.54492
		184	-7.32422				184	4.88281
		184.5	-8.54492				184.5	5.49316
		185	-7.93457				185	7.93457
		185.5	-7.32422				185.5	7.93457
		186	-10.376				186	9.76563
		186.5	-9.76563				186.5	9.15527
		187	-7.32422				187	6.71387
		187.5	-8.54492				187.5	7.93457
		188	-10.376				188	9.15527
		188.5	-10.9863				188.5	7.32422
		189	-10.376				189	7.93457
		189.5	-12.207				189.5	6.71387
		190	-10.376				190	9.15527
		190.5	-10.9863				190.5	9.15527
		191	-10.376				191	9.15527
		191.5	-9.76563				191.5	7.32422
		192	-9.15527				192	9.15527
		192.5	-10.9863				192.5	7.32422
		193	-7.93457				193	7.32422
		193.5	-10.9863				193.5	9.76563
		194	-8.54492				194	10.376
		194.5	-7.32422				194.5	10.9863
		195	-9.76563				195	7.93457
		195.5	-10.376				195.5	7.93457
		196	-10.376				196	6.10352
		196.5	-7.93457				196.5	6.10352
		197	-7.93457				197	7.93457
		197.5	-7.32422				197.5	8.54492
		198	-9.15527				198	7.93457
		198.5	-9.15527				198.5	9.76563
		199	-8.54492				199	9.15527
		199.5	-7.32422				199.5	9.15527
		200	-7.32422				200	9.15527
		200.5	-6.71387				200.5	7.93457
		201	-7.93457				201	9.15527
		201.5	-7.93457				201.5	10.376
		202	-6.71387				202	10.9863
		202.5	-9.76563				202.5	7.32422
		203	-7.93457				203	9.15527
		203.5	-7.93457				203.5	10.376
		204	-9.15527				204	9.15527
		204.5	-10.376				204.5	9.15527
		205	-10.376				205	7.93457
		205.5	-9.76563				205.5	5.49316
		206	-10.376				206	8.54492
		206.5	-8.54492				206.5	7.32422
		207	-13.4277				207	7.32422
		207.5	-11.5967				207.5	7.32422
		208	-13.4277				208	6.10352
		208.5	-11.5967				208.5	8.54492
		209	-9.15527				209	6.71387
		209.5	-13.4277				209.5	7.93457
		210	-12.8174				210	7.93457
		210.5	-11.5967				210.5	7.93457
		211	-11.5967				211	11.5967
		211.5	-8.54492				211.5	6.10352
		212	-10.376				212	7.32422
		212.5	-10.9863				212.5	7.32422
		213	-9.76563				213	7.32422
		213.5	-9.76563				213.5	6.71387
		214	-11.5967				214	6.10352
		214.5	-12.207				214.5	9.15527
		215	-8.54492				215	9.76563
		215.5	-8.54492				215.5	8.54492
		216	-9.76563				216	7.93457
		216.5	-7.32422				216.5	7.32422
		217	-8.54492				217	9.15527
		217.5	-8.54492				217.5	7.32422
		218	-8.54492				218	6.71387
		218.5	-9.15527				218.5	5.49316
		219	-8.54492				219	4.88281
		219.5	-9.15527				219.5	6.71387
		220	-9.15527				220	7.32422
		220.5	-8.54492				220.5	7.32422
		221	-9.15527				221	7.32422
		221.5	-10.376				221.5	9.76563
		222	-9.15527				222	7.93457
		222.5	-8.54492				222.5	4.88281
		223	-10.9863				223	5.49316
		223.5	-10.376				223.5	3.05176
		224	-8.54492				224	3.05176
		224.5	-10.376				224.5	3.05176
		225	-9.76563				225	4.88281
		225.5	-7.93457				225.5	4.27246
		226	-7.93457				226	5.49316
		226.5	-9.15527				226.5	6.71387
		227	-8.54492				227	7.32422
		227.5	-7.32422				227.5	7.93457
		228	-8.54492				228	6.71387
		228.5	-8.54492				228.5	8.54492
		229	-9.76563				229	7.93457
		229.5	-10.376				229.5	9.15527
		230	-9.76563				230	9.15527
		230.5	-8.54492				230.5	9.15527
		231	-6.71387				231	9.15527
		231.5	-7.93457				231.5	10.376
		232	-4.88281				232	8.54492
		232.5	-6.10352				232.5	9.76563
		233	-6.10352				233	7.93457
		233.5	-7.32422				233.5	10.376
		234	-7.93457				234	6.10352
		234.5	-10.376				234.5	6.10352
		235	-10.9863				235	5.49316
		235.5	-9.76563				235.5	7.32422
		236	-9.76563				236	6.71387
		236.5	-7.93457				236.5	9.15527
		237	-7.93457				237	8.54492
		237.5	-8.54492				237.5	7.93457
		238	-9.15527				238	5.49316
		238.5	-7.32422				238.5	9.15527
		239	-7.93457				239	8.54492
		239.5	-8.54492				239.5	7.32422
		240	-9.15527				240	7.32422
		240.5	-8.54492				240.5	6.71387
		241	-11.5967				241	7.93457
		241.5	-10.376				241.5	6.71387
		242	-10.9863				242	6.71387
		242.5	-10.9863				242.5	7.93457
		243	-10.376				243	9.76563
		243.5	-7.32422				243.5	7.93457
		244	-9.76563				244	6.71387
		244.5	-7.93457				244.5	9.15527
		245	-7.93457				245	6.71387
		245.5	-7.32422				245.5	8.54492
		246	-7.32422				246	7.32422
		246.5	-10.376				246.5	8.54492
		247	-7.93457				247	10.376
		247.5	-6.71387				247.5	5.49316
		248	-5.49316				248	7.32422
		248.5	-7.32422				248.5	7.32422
		249	-6.71387				249	7.93457
		249.5	-6.71387				249.5	7.32422
		250	-7.93457				250	12.207
		250.5	-9.15527				250.5	7.93457
		251	-7.93457				251	7.32422
		251.5	-4.88281				251.5	8.54492
		252	-7.32422				252	7.32422
		252.5	-6.71387				252.5	7.32422
		253	-8.54492				253	7.93457
		253.5	-9.76563				253.5	8.54492
		254	-9.15527				254	6.10352
		254.5	-7.32422				254.5	7.32422
		255	-7.32422				255	7.32422
		255.5	-7.32422				255.5	7.93457
		256	-7.32422				256	6.10352
		256.5	-7.32422				256.5	6.10352
		257	-9.15527				257	7.32422
		257.5	-9.15527				257.5	6.10352
		258	-7.32422				258	6.10352
		258.5	-5.49316				258.5	7.93457
		259	-9.15527				259	9.15527
		259.5	-8.54492				259.5	7.93457
		260	-7.32422				260	6.71387
		260.5	-6.10352				260.5	8.54492
		261	-7.93457				261	7.32422
		261.5	-8.54492				261.5	7.32422
		262	-10.376				262	6.71387
		262.5	-7.93457				262.5	9.76563
		263	-8.54492				263	10.9863
		263.5	-8.54492				263.5	8.54492
		264	-7.32422				264	6.71387
		264.5	-9.15527				264.5	6.71387
		265	-7.32422				265	8.54492
		265.5	-6.71387				265.5	6.71387
		266	-6.71387				266	7.93457
		266.5	-7.32422				266.5	8.54492
		267	-8.54492				267	7.93457
		267.5	-7.93457				267.5	8.54492
		268	-9.76563				268	8.54492
		268.5	-8.54492				268.5	7.32422
		269	-7.93457				269	6.10352
		269.5	-9.15527				269.5	5.49316
		270	-9.15527				270	7.93457
		270.5	-6.71387				270.5	10.376
		271	-9.15527				271	7.32422
		271.5	-12.207				271.5	6.71387
		272	-10.9863				272	3.66211
		272.5	-10.9863				272.5	5.49316
		273	-10.9863				273	6.10352
		273.5	-10.9863				273.5	7.93457
		274	-10.376				274	10.9863
		274.5	-9.76563				274.5	8.54492
		275	-9.76563				275	7.93457
		275.5	-7.93457				275.5	9.15527
		276	-9.15527				276	7.93457
		276.5	-11.5967				276.5	9.15527
		277	-9.76563				277	7.32422
		277.5	-9.76563				277.5	7.93457
		278	-14.0381				278	6.71387
		278.5	-13.4277				278.5	6.10352
		279	-9.76563				279	6.10352
		279.5	-9.15527				279.5	7.32422
		280	-9.76563				280	10.376
		280.5	-6.71387				280.5	8.54492
		281	-9.76563				281	5.49316
		281.5	-10.376				281.5	5.49316
		282	-7.32422				282	7.93457
		282.5	-9.15527				282.5	6.10352
		283	-10.376				283	4.88281
		283.5	-9.76563				283.5	9.15527
		284	-8.54492				284	8.54492
		284.5	-9.15527				284.5	6.71387
		285	-9.15527				285	7.32422
		285.5	-7.32422				285.5	9.15527
		286	-7.93457				286	8.54492
		286.5	-9.15527				286.5	7.93457
		287	-10.376				287	8.54492
		287.5	-10.376				287.5	5.49316
		288	-10.376				288	7.32422
		288.5	-9.15527				288.5	9.15527
		289	-7.93457				289	8.54492
		289.5	-7.93457				289.5	8.54492
		290	-9.76563				290	7.32422
		290.5	-9.15527				290.5	9.15527
		291	-7.32422				291	9.15527
		291.5	-7.93457				291.5	7.32422
		292	-7.93457				292	7.32422
		292.5	-7.93457				292.5	8.54492
		293	-6.71387				293	7.93457
		293.5	-6.71387				293.5	7.32422
		294	-6.71387				294	8.54492
		294.5	-5.49316				294.5	9.76563
		295	-7.32422				295	9.76563
		295.5	-5.49316				295.5	9.76563
		296	-7.32422				296	8.54492
		296.5	-7.32422				296.5	8.54492
		297	-6.10352				297	7.93457
		297.5	-6.71387				297.5	7.93457
		298	-8.54492				298	9.15527
		298.5	-7.93457				298.5	9.15527
		299	-7.32422				299	7.32422
		299.5	-6.71387				299.5	7.93457
		300	-8.54492				300	5.49316
		300.5	-8.54492				300.5	4.27246
		301	-7.93457				301	6.71387
		301.5	-9.15527				301.5	6.10352
		302	-7.32422				302	7.93457
		302.5	-7.32422				302.5	8.54492
		303	-7.32422				303	8.54492
		303.5	-7.93457				303.5	8.54492
		304	-6.71387				304	8.54492
		304.5	-7.93457				304.5	8.54492
		305	-6.10352				305	10.376
		305.5	-8.54492				305.5	6.71387
		306	-7.93457				306	9.76563
		306.5	-6.71387				306.5	6.10352
		307	-7.32422				307	8.54492
		307.5	-6.71387				307.5	6.10352
		308	-8.54492				308	10.376
		308.5	-10.376				308.5	8.54492
		309	-9.76563				309	10.376
		309.5	-9.15527				309.5	9.15527
		310	-9.15527				310	7.32422
		310.5	-8.54492				310.5	7.93457
		311	-7.93457				311	7.32422
		311.5	-7.93457				311.5	4.88281
		312	-7.93457				312	9.15527
		312.5	-7.93457				312.5	9.76563
		313	-7.93457				313	6.10352
		313.5	-8.54492				313.5	7.32422
		314	-7.32422				314	4.88281
		314.5	-7.93457				314.5	6.71387
		315	-9.15527				315	6.71387
		315.5	-8.54492				315.5	9.76563
		316	-7.32422				316	6.71387
		316.5	-9.15527				316.5	6.10352
		317	-8.54492				317	9.76563
		317.5	-8.54492				317.5	8.54492
		318	-10.9863				318	7.93457
		318.5	-7.32422				318.5	7.93457
		319	-7.32422				319	8.54492
		319.5	-9.15527				319.5	7.32422
		320	-7.32422				320	8.54492
		320.5	-8.54492				320.5	7.93457
		321	-7.93457				321	6.71387
		321.5	-7.32422				321.5	9.76563
		322	-7.32422				322	6.71387
		322.5	-6.71387				322.5	6.71387
		323	-7.93457				323	7.32422
		323.5	-6.10352				323.5	9.15527
		324	-7.32422				324	7.32422
		324.5	-6.10352				324.5	8.54492
		325	-9.76563				325	6.71387
		325.5	-9.15527				325.5	9.76563
		326	-7.32422				326	6.71387
		326.5	-8.54492				326.5	6.71387
		327	-7.93457				327	7.32422
		327.5	-7.32422				327.5	6.71387
		328	-8.54492				328	8.54492
		328.5	-7.93457				328.5	5.49316
		329	-8.54492				329	4.88281
		329.5	-9.15527				329.5	6.10352
		330	-8.54492				330	5.49316
		330.5	-8.54492				330.5	4.88281
		331	-6.10352				331	3.05176
		331.5	-6.71387				331.5	7.32422
		332	-9.15527				332	6.10352
		332.5	-7.32422				332.5	7.32422
		333	-7.93457				333	6.71387
		333.5	-6.71387				333.5	4.88281
		334	-7.93457				334	5.49316
		334.5	-7.32422				334.5	4.88281
		335	-10.376				335	4.27246
		335.5	-8.54492				335.5	7.32422
		336	-9.15527				336	7.32422
		336.5	-9.15527				336.5	10.376
		337	-9.15527				337	7.93457
		337.5	-9.76563				337.5	7.93457
		338	-7.32422				338	9.76563
		338.5	-7.93457				338.5	7.93457
		339	-8.54492				339	7.93457
		339.5	-8.54492				339.5	10.376
		340	-8.54492				340	6.10352
		340.5	-8.54492				340.5	6.71387
		341	-7.93457				341	6.10352
		341.5	-7.93457				341.5	7.32422
		342	-6.71387				342	6.10352
		342.5	-8.54492				342.5	7.32422
		343	-6.71387				343	7.93457
		343.5	-8.54492				343.5	9.15527
		344	-6.10352				344	7.93457
		344.5	-9.15527				344.5	6.71387
		345	-8.54492				345	6.71387
		345.5	-7.32422				345.5	7.93457
		346	-10.376				346	7.32422
		346.5	-8.54492				346.5	10.9863
		347	-8.54492				347	7.93457
		347.5	-8.54492				347.5	7.32422
		348	-9.15527				348	9.15527
		348.5	-7.32422				348.5	7.32422
		349	-6.71387				349	9.15527
		349.5	-6.71387				349.5	11.5967
		350	-7.32422				350	7.93457
		350.5	-7.93457				350.5	7.32422
		351	-7.32422				351	9.15527
		351.5	-7.93457				351.5	9.15527
		352	-7.32422				352	9.76563
		352.5	-7.32422				352.5	9.76563
		353	-7.93457				353	7.93457
		353.5	-7.93457				353.5	7.32422
		354	-6.71387				354	6.71387
		354.5	-8.54492				354.5	8.54492
		355	-7.93457				355	7.32422
		355.5	-7.32422				355.5	7.93457
		356	-7.93457				356	9.15527
		356.5	-7.93457				356.5	8.54492
		357	-8.54492				357	6.71387
		357.5	-5.49316				357.5	10.9863
		358	-6.71387				358	10.376
		358.5	-7.32422				358.5	10.9863
		359	-8.54492				359	7.32422
		359.5	-7.93457				359.5	8.54492
		360	-9.15527				360	10.376
		360.5	-6.71387				360.5	9.76563
		361	-6.10352				361	8.54492
		361.5	-7.32422				361.5	6.10352
		362	-7.32422				362	6.71387
		362.5	-8.54492				362.5	5.49316
		363	-7.32422				363	5.49316
		363.5	-8.54492				363.5	7.32422
		364	-8.54492				364	7.93457
		364.5	-5.49316				364.5	10.376
		365	-4.27246				365	6.71387
		365.5	-6.71387				365.5	9.15527
		366	-7.93457				366	7.93457
		366.5	-8.54492				366.5	10.376
		367	-9.15527				367	7.93457
		367.5	-7.32422				367.5	9.15527
		368	-10.376				368	9.15527
		368.5	-8.54492				368.5	8.54492
		369	-9.76563				369	7.93457
		369.5	-9.76563				369.5	6.71387
		370	-7.93457				370	7.32422
		370.5	-9.76563				370.5	7.93457
		371	-8.54492				371	8.54492
		371.5	-7.93457				371.5	9.76563
		372	-7.32422				372	7.32422
		372.5	-6.71387				372.5	7.93457
		373	-6.71387				373	7.32422
		373.5	-6.71387				373.5	8.54492
		374	-6.71387				374	7.93457
		374.5	-6.71387				374.5	7.32422
		375	-10.376				375	7.93457
		375.5	-11.5967				375.5	7.32422
		376	-12.207				376	7.32422
		376.5	-9.76563				376.5	7.32422
		377	-11.5967				377	6.10352
		377.5	-9.76563				377.5	7.32422
		378	-10.376				378	7.32422
		378.5	-9.15527				378.5	7.93457
		379	-12.207				379	6.71387
		379.5	-10.376				379.5	8.54492
		380	-10.376				380	8.54492
		380.5	-9.76563				380.5	8.54492
		381	-8.54492				381	9.76563
		381.5	-9.15527				381.5	9.76563
		382	-10.376				382	9.15527
		382.5	-9.15527				382.5	10.9863
		383	-8.54492				383	9.15527
		383.5	-9.15527				383.5	9.76563
		384	-8.54492				384	10.376
		384.5	-9.15527				384.5	9.15527
		385	-9.15527				385	9.76563
		385.5	-10.9863				385.5	7.32422
		386	-9.76563				386	9.15527
		386.5	-10.9863				386.5	7.93457
		387	-9.15527				387	8.54492
		387.5	-7.32422				387.5	7.93457
		388	-8.54492				388	8.54492
		388.5	-7.93457				388.5	6.71387
		389	-9.15527				389	5.49316
		389.5	-9.76563				389.5	8.54492
		390	-9.15527				390	6.10352
		390.5	-7.32422				390.5	6.71387
		391	-9.15527				391	4.88281
		391.5	-9.76563				391.5	6.10352
		392	-8.54492				392	4.88281
		392.5	-10.376				392.5	8.54492
		393	-10.376				393	6.71387
		393.5	-8.54492				393.5	3.66211
		394	-8.54492				394	6.71387
		394.5	-7.32422				394.5	6.71387
		395	-7.93457				395	9.15527
		395.5	-9.15527				395.5	8.54492
		396	-9.76563				396	9.76563
		396.5	-8.54492				396.5	6.71387
		397	-8.54492				397	8.54492
		397.5	-7.93457				397.5	6.71387
		398	-11.5967				398	7.93457
		398.5	-9.15527				398.5	8.54492
		399	-7.93457				399	6.71387
		399.5	-9.76563				399.5	4.88281
		400	-7.32422				400	6.71387
		400.5	-10.9863				400.5	9.15527
		401	-6.10352				401	8.54492
		401.5	-8.54492				401.5	9.15527
		402	-8.54492				402	8.54492
		402.5	-9.76563				402.5	10.9863
		403	-10.376				403	9.15527
		403.5	-9.76563				403.5	9.15527
		404	-7.93457				404	10.9863
		404.5	-9.15527				404.5	9.76563
		405	-8.54492				405	7.93457
		405.5	-8.54492				405.5	9.15527
		406	-7.32422				406	6.10352
		406.5	-7.93457				406.5	8.54492
		407	-6.10352				407	9.15527
		407.5	-6.71387				407.5	7.93457
		408	-7.32422				408	9.15527
		408.5	-4.88281				408.5	6.10352
		409	-7.32422				409	8.54492
		409.5	-6.71387				409.5	7.32422
		410	-9.76563				410	8.54492
		410.5	-9.76563				410.5	7.93457
		411	-9.15527				411	8.54492
		411.5	-8.54492				411.5	6.71387
		412	-7.93457				412	8.54492
		412.5	-8.54492				412.5	9.15527
		413	-7.93457				413	9.76563
		413.5	-8.54492				413.5	8.54492
		414	-7.32422				414	7.93457
		414.5	-7.93457				414.5	9.15527
		415	-7.93457				415	7.93457
		415.5	-7.93457				415.5	9.15527
		416	-7.93457				416	7.93457
		416.5	-8.54492				416.5	8.54492
		417	-8.54492				417	7.93457
		417.5	-10.9863				417.5	6.10352
		418	-10.9863				418	9.15527
		418.5	-9.76563				418.5	6.71387
		419	-7.32422				419	7.93457
		419.5	-9.15527				419.5	6.10352
		420	-9.76563				420	7.32422
		420.5	-9.76563				420.5	6.10352
		421	-10.376				421	6.71387
		421.5	-8.54492				421.5	5.49316
		422	-9.76563				422	5.49316
		422.5	-9.76563				422.5	4.88281
		423	-7.93457				423	8.54492
		423.5	-7.32422				423.5	7.32422
		424	-7.32422				424	6.71387
		424.5	-6.10352				424.5	6.10352
		425	-6.71387				425	6.71387
		425.5	-8.54492				425.5	4.88281
		426	-8.54492				426	4.88281
		426.5	-7.93457				426.5	7.93457
		427	-9.15527				427	7.32422
		427.5	-6.71387				427.5	7.32422
		428	-7.32422				428	6.71387
		428.5	-7.32422				428.5	6.71387
		429	-8.54492				429	7.32422
		429.5	-8.54492				429.5	8.54492
		430	-7.32422				430	7.32422
		430.5	-6.71387				430.5	8.54492
		431	-11.5967				431	7.32422
		431.5	-9.15527				431.5	7.93457
		432	-10.9863				432	6.10352
		432.5	-9.76563				432.5	6.10352
		433	-8.54492				433	7.32422
		433.5	-9.15527				433.5	6.71387
		434	-9.76563				434	6.10352
		434.5	-9.76563				434.5	6.10352
		435	-9.15527				435	6.10352
		435.5	-9.76563				435.5	9.15527
		436	-12.8174				436	6.71387
		436.5	-9.76563				436.5	10.9863
		437	-9.15527				437	5.49316
		437.5	-10.376				437.5	7.93457
		438	-8.54492				438	7.93457
		438.5	-10.9863				438.5	6.10352
		439	-11.5967				439	7.32422
		439.5	-9.76563				439.5	9.15527
		440	-9.15527				440	7.93457
		440.5	-7.93457				440.5	9.76563
		441	-7.93457				441	6.10352
		441.5	-10.376				441.5	7.32422
		442	-10.376				442	7.32422
		442.5	-9.15527				442.5	7.93457
		443	-9.76563				443	5.49316
		443.5	-9.76563				443.5	4.88281
		444	-10.9863				444	6.10352
		444.5	-9.76563				444.5	5.49316
		445	-9.15527				445	6.10352
		445.5	-10.376				445.5	7.93457
		446	-9.76563				446	7.93457
		446.5	-10.9863				446.5	7.32422
		447	-10.9863				447	4.88281
		447.5	-9.15527				447.5	9.76563
		448	-10.376				448	7.32422
		448.5	-9.76563				448.5	6.71387
		449	-10.376				449	6.10352
		449.5	-9.15527				449.5	7.32422
		450	-9.15527				450	7.32422
		450.5	-9.15527				450.5	7.32422
		451	-9.15527				451	10.376
		451.5	-9.76563				451.5	6.71387
		452	-9.76563				452	9.76563
		452.5	-12.207				452.5	9.15527
		453	-10.376				453	8.54492
		453.5	-11.5967				453.5	9.15527
		454	-10.376				454	9.76563
		454.5	-8.54492				454.5	7.32422
		455	-11.5967				455	7.32422
		455.5	-9.76563				455.5	9.76563
		456	-8.54492				456	7.32422
		456.5	-9.15527				456.5	9.15527
		457	-8.54492				457	7.32422
		457.5	-9.76563				457.5	10.9863
		458	-7.32422				458	9.76563
		458.5	-7.93457				458.5	8.54492
		459	-9.15527				459	10.376
		459.5	-8.54492				459.5	10.376
		460	-7.93457				460	8.54492
		460.5	-7.93457				460.5	9.76563
		461	-6.71387				461	9.15527
		461.5	-8.54492				461.5	7.93457
		462	-9.15527				462	7.93457
		462.5	-9.15527				462.5	9.76563
		463	-8.54492				463	6.10352
		463.5	-7.93457				463.5	9.15527
		464	-8.54492				464	8.54492
		464.5	-8.54492				464.5	8.54492
		465	-8.54492				465	7.93457
		465.5	-7.32422				465.5	9.15527
		466	-8.54492				466	9.15527
		466.5	-7.93457				466.5	6.71387
		467	-8.54492				467	6.10352
		467.5	-9.15527				467.5	9.15527
		468	-9.76563				468	8.54492
		468.5	-7.32422				468.5	6.10352
		469	-9.15527				469	8.54492
		469.5	-10.376				469.5	9.15527
		470	-11.5967				470	8.54492
		470.5	-9.15527				470.5	12.207
		471	-7.93457				471	6.71387
		471.5	-10.376				471.5	7.32422
		472	-7.32422				472	7.93457
		472.5	-8.54492				472.5	7.93457
		473	-9.15527				473	9.76563
		473.5	-7.93457				473.5	9.76563
		474	-7.93457				474	8.54492
		474.5	-7.93457				474.5	9.15527
		475	-8.54492				475	8.54492
		475.5	-7.32422				475.5	9.15527
		476	-9.15527				476	10.376
		476.5	-9.76563				476.5	7.93457
		477	-7.32422				477	5.49316
		477.5	-7.93457				477.5	7.93457
		478	-9.76563				478	7.32422
		478.5	-7.32422				478.5	8.54492
		479	-9.15527				479	6.71387
		479.5	-9.15527				479.5	7.32422
		480	-9.15527				480	7.93457
		480.5	-8.54492				480.5	7.32422
		481	-9.76563				481	6.71387
		481.5	-8.54492				481.5	5.49316
		482	-8.54492				482	7.32422
		482.5	-8.54492				482.5	6.71387
		483	-9.15527				483	5.49316
		483.5	-6.10352				483.5	8.54492
		484	-6.71387				484	8.54492
		484.5	-6.71387				484.5	7.32422
		485	-7.93457				485	7.32422
		485.5	-8.54492				485.5	7.93457
		486	-6.71387				486	7.93457
		486.5	-8.54492				486.5	7.93457
		487	-8.54492				487	7.93457
		487.5	-9.15527				487.5	9.15527
		488	-10.376				488	8.54492
		488.5	-9.15527				488.5	6.10352
		489	-9.15527				489	7.93457
		489.5	-10.9863				489.5	6.10352
		490	-10.9863				490	5.49316
		490.5	-11.5967				490.5	6.10352
		491	-9.76563				491	7.32422
		491.5	-9.15527				491.5	6.71387
		492	-9.15527				492	6.71387
		492.5	-8.54492				492.5	7.32422
		493	-9.15527				493	9.15527
		493.5	-9.15527				493.5	10.376
		494	-9.15527				494	7.32422
		494.5	-10.376				494.5	8.54492
		495	-9.15527				495	7.32422
		495.5	-10.9863				495.5	7.32422
		496	-8.54492				496	9.15527
		496.5	-9.15527				496.5	7.32422
		497	-9.15527				497	9.76563
		497.5	-9.15527				497.5	7.32422
		498	-10.376				498	8.54492
		498.5	-10.376				498.5	8.54492
		499	-9.15527				499	4.27246
		499.5	-10.376				499.5	6.10352
		500	-8.54492				500	6.10352
		500.5	-9.15527				500.5	6.71387
		501	-9.15527				501	7.32422
		501.5	-10.376				501.5	7.32422
		502	-9.15527				502	7.93457
		502.5	-9.15527				502.5	8.54492
		503	-6.71387				503	8.54492
		503.5	-9.15527				503.5	9.15527
		504	-9.76563				504	10.9863
		504.5	-9.15527				504.5	6.71387
		505	-9.15527				505	10.376
		505.5	-9.15527				505.5	9.15527
		506	-10.376				506	8.54492
		506.5	-10.9863				506.5	8.54492
		507	-10.9863				507	7.93457
		507.5	-9.76563				507.5	8.54492
		508	-9.15527				508	7.32422
		508.5	-10.9863				508.5	10.376
		509	-12.207				509	6.71387
		509.5	-7.93457				509.5	6.71387
		510	-9.15527				510	10.376
		510.5	-9.15527				510.5	9.76563
		511	-10.9863				511	6.71387
		511.5	-10.9863				511.5	6.71387
		512	-9.15527				512	6.71387
		512.5	-10.9863				512.5	5.49316
		513	-10.376				513	7.32422
		513.5	-10.9863				513.5	7.32422
		514	-9.76563				514	9.76563
		514.5	-9.76563				514.5	7.32422
		515	-10.376				515	6.71387
		515.5	-11.5967				515.5	6.71387
		516	-9.15527				516	5.49316
		516.5	-9.15527				516.5	4.88281
		517	-8.54492				517	4.88281
		517.5	-9.15527				517.5	6.71387
		518	-9.15527				518	5.49316
		518.5	-9.15527				518.5	8.54492
		519	-10.376				519	4.88281
		519.5	-9.76563				519.5	5.49316
		520	-7.93457				520	7.32422
		520.5	-7.93457				520.5	6.71387
		521	-7.93457				521	4.88281
		521.5	-7.93457				521.5	8.54492
		522	-7.32422				522	7.93457
		522.5	-7.32422				522.5	6.71387
		523	-7.93457				523	6.10352
		523.5	-9.76563				523.5	6.10352
		524	-8.54492				524	7.32422
		524.5	-8.54492				524.5	8.54492
		525	-9.76563				525	6.71387
		525.5	-7.93457				525.5	6.10352
		526	-10.376				526	5.49316
		526.5	-9.15527				526.5	8.54492
		527	-12.8174				527	8.54492
		527.5	-10.376				527.5	7.93457
		528	-11.5967				528	7.93457
		528.5	-7.93457				528.5	10.376
		529	-8.54492				529	6.71387
		529.5	-7.93457				529.5	7.93457
		530	-9.76563				530	9.76563
		530.5	-9.15527				530.5	10.9863
		531	-8.54492				531	7.93457
		531.5	-7.93457				531.5	7.93457
		532	-9.76563				532	6.10352
		532.5	-9.15527				532.5	7.32422
		533	-10.376				533	7.32422
		533.5	-9.15527				533.5	8.54492
		534	-9.76563				534	7.93457
		534.5	-9.15527				534.5	7.93457
		535	-8.54492				535	8.54492
		535.5	-8.54492				535.5	6.71387
		536	-9.76563				536	7.32422
		536.5	-8.54492				536.5	6.10352
		537	-8.54492				537	6.10352
		537.5	-10.376				537.5	5.49316
		538	-8.54492				538	7.93457
		538.5	-7.93457				538.5	7.32422
		539	-9.76563				539	6.71387
		539.5	-11.5967				539.5	4.88281
		540	-9.15527				540	6.71387
		540.5	-10.376				540.5	7.32422
		541	-11.5967				541	6.10352
		541.5	-10.376				541.5	8.54492
		542	-9.15527				542	9.15527
		542.5	-9.76563				542.5	6.71387
		543	-8.54492				543	6.71387
		543.5	-9.76563				543.5	7.93457
		544	-9.76563				544	5.49316
		544.5	-10.9863				544.5	7.93457
		545	-9.15527				545	6.10352
		545.5	-7.93457				545.5	4.88281
		546	-8.54492				546	7.93457
		546.5	-8.54492				546.5	5.49316
		547	-7.93457				547	5.49316
		547.5	-10.376				547.5	6.71387
		548	-10.376				548	6.71387
		548.5	-9.76563				548.5	7.93457
		549	-9.15527				549	6.71387
		549.5	-9.76563				549.5	6.10352
		550	-8.54492				550	6.10352
		550.5	-10.9863				550.5	6.71387
		551	-9.76563				551	6.10352
		551.5	-8.54492				551.5	6.10352
		552	-8.54492				552	6.10352
		552.5	-10.9863				552.5	6.71387
		553	-9.76563				553	6.10352
		553.5	-9.76563				553.5	3.66211
		554	-7.93457				554	4.27246
		554.5	-7.32422				554.5	4.88281
		555	-7.93457				555	5.49316
		555.5	-8.54492				555.5	3.05176
		556	-8.54492				556	6.10352
		556.5	-7.93457				556.5	6.71387
		557	-9.15527				557	6.71387
		557.5	-9.76563				557.5	6.10352
		558	-8.54492				558	9.15527
		558.5	-7.93457				558.5	7.93457
		559	-7.93457				559	5.49316
		559.5	-9.76563				559.5	7.32422
		560	-7.93457				560	7.32422
		560.5	-10.9863				560.5	6.10352
		561	-10.376				561	5.49316
		561.5	-9.76563				561.5	4.27246
		562	-9.76563				562	8.54492
		562.5	-8.54492				562.5	6.10352
		563	-7.32422				563	6.71387
		563.5	-7.93457				563.5	6.71387
		564	-7.93457				564	6.71387
		564.5	-7.93457				564.5	9.15527
		565	-7.93457				565	8.54492
		565.5	-7.93457				565.5	6.71387
		566	-7.32422				566	7.32422
		566.5	-9.15527				566.5	10.376
		567	-8.54492				567	9.76563
		567.5	-7.93457				567.5	10.376
		568	-10.376				568	10.376
		568.5	-6.71387				568.5	9.15527
		569	-7.93457				569	8.54492
		569.5	-11.5967				569.5	9.76563
		570	-10.376				570	9.15527
		570.5	-9.76563				570.5	10.376
		571	-7.32422				571	7.93457
		571.5	-7.32422				571.5	10.9863
		572	-8.54492				572	8.54492
		572.5	-6.71387				572.5	10.9863
		573	-7.32422				573	7.93457
		573.5	-7.93457				573.5	9.15527
		574	-7.93457				574	6.71387
		574.5	-8.54492				574.5	9.15527
		575	-9.15527				575	8.54492
		575.5	-9.15527				575.5	10.376
		576	-9.15527				576	8.54492
		576.5	-7.93457				576.5	12.207
		577	-10.376				577	8.54492
		577.5	-7.93457				577.5	7.32422
		578	-9.76563				578	10.376
		578.5	204.468				578.5	189.209
		579	67.1387				579	71.4111
		579.5	68.9697				579.5	154.419
		580	65.918				580	155.64
		580.5	62.8662				580.5	152.588
		581	62.2559				581	150.757
		581.5	64.0869				581.5	150.146
		582	64.0869				582	148.926
		582.5	63.4766				582.5	149.536
		583	65.3076				583	148.315
		583.5	65.918				583.5	144.043
		584	63.4766				584	144.653
		584.5	65.3076				584.5	143.433
		585	64.6973				585	142.212
		585.5	64.0869				585.5	144.043
		586	63.4766				586	147.095
		586.5	65.3076				586.5	144.653
		587	65.918				587	145.264
		587.5	68.3594				587.5	145.264
		588	68.3594				588	143.433
		588.5	67.749				588.5	148.926
		589	65.918				589	144.653
		589.5	65.3076				589.5	147.705
		590	66.5283				590	149.536
		590.5	64.6973				590.5	148.315
		591	64.6973				591	144.653
		591.5	66.5283				591.5	147.095
		592	66.5283				592	149.536
		592.5	67.749				592.5	145.874
		593	67.749				593	151.367
		593.5	66.5283				593.5	151.367
		594	64.0869				594	152.588
		594.5	67.1387				594.5	151.367
		595	68.3594				595	153.198
		595.5	68.3594				595.5	153.198
		596	62.8662				596	153.198
		596.5	64.6973				596.5	149.536
		597	64.6973				597	152.588
		597.5	61.0352				597.5	154.419
		598	58.5938				598	153.198
		598.5	62.2559				598.5	157.471
		599	62.8662				599	155.029
		599.5	61.0352				599.5	155.64
		600	59.8145				600	158.081
		600.5	60.4248				600.5	161.133
		601	58.5938				601	161.133
		601.5	59.2041				601.5	158.691
		602	61.6455				602	159.912
		602.5	59.2041				602.5	162.354
		603	59.2041				603	161.743
		603.5	56.7627				603.5	164.185
		604	59.8145				604	168.457
		604.5	57.373				604.5	166.016
		605	57.9834				605	169.678
		605.5	57.373				605.5	170.288
		606	56.7627				606	168.457
		606.5	60.4248				606.5	172.729
		607	57.9834				607	173.95
		607.5	59.2041				607.5	172.729
		608	57.9834				608	173.34
		608.5	57.373				608.5	173.95
		609	57.373				609	176.392
		609.5	57.373				609.5	180.054
		610	56.1523				610	175.781
		610.5	60.4248				610.5	178.833
		611	56.7627				611	180.664
		611.5	56.7627				611.5	181.274
		612	55.542				612	179.443
		612.5	56.1523				612.5	179.443
		613	54.3213				613	180.664
		613.5	54.3213				613.5	183.716
		614	54.9316				614	183.716
		614.5	54.9316				614.5	182.495
		615	57.373				615	186.157
		615.5	55.542				615.5	187.378
		616	56.1523				616	184.326
		616.5	56.7627				616.5	187.378
		617	55.542				617	192.261
		617.5	56.1523				617.5	186.768
		618	57.9834				618	190.43
		618.5	57.373				618.5	187.988
		619	58.5938				619	186.157
		619.5	56.1523				619.5	192.261
		620	55.542				620	193.481
		620.5	54.9316				620.5	195.312
		621	54.9316				621	195.312
		621.5	53.7109				621.5	197.144
		622	53.1006				622	200.195
		622.5	53.7109				622.5	194.702
		623	53.7109				623	195.923
		623.5	54.3213				623.5	200.195
		624	53.7109				624	200.195
		624.5	56.1523				624.5	201.416
		625	54.9316				625	201.416
		625.5	55.542				625.5	200.195
		626	53.7109				626	204.468
		626.5	56.1523				626.5	206.299
		627	53.7109				627	209.961
		627.5	54.3213				627.5	210.571
		628	54.9316				628	211.182
		628.5	54.9316				628.5	209.961
		629	54.3213				629	213.013
		629.5	55.542				629.5	216.675
		630	54.9316				630	219.116
		630.5	55.542				630.5	220.947
		631	56.7627				631	222.778
		631.5	53.7109				631.5	225.83
		632	52.4902				632	221.558
		632.5	54.3213				632.5	223.999
		633	54.3213				633	223.999
		633.5	53.1006				633.5	228.271
		634	55.542				634	228.271
		634.5	54.3213				634.5	227.051
		635	53.7109				635	229.492
		635.5	52.4902				635.5	235.596
		636	53.7109				636	237.427
		636.5	51.8799				636.5	238.647
		637	53.7109				637	237.427
		637.5	53.1006				637.5	235.596
		638	53.7109				638	238.037
		638.5	53.1006				638.5	239.258
		639	54.9316				639	240.479
		639.5	54.3213				639.5	239.258
		640	53.1006				640	238.037
		640.5	52.4902				640.5	245.361
		641	53.7109				641	248.413
		641.5	51.8799				641.5	250.854
		642	49.4385				642	251.465
		642.5	53.1006				642.5	247.803
		643	53.1006				643	249.023
		643.5	53.7109				643.5	249.634
		644	51.8799				644	248.413
		644.5	53.1006				644.5	250.244
		645	51.8799				645	256.348
		645.5	54.3213				645.5	257.568
		646	54.3213				646	259.399
		646.5	56.1523				646.5	258.179
		647	51.2695				647	257.568
		647.5	51.8799				647.5	261.841
		648	51.2695				648	267.334
		648.5	54.9316				648.5	270.386
		649	53.1006				649	269.775
		649.5	53.1006				649.5	269.775
		650	53.7109				650	270.386
		650.5	56.7627				650.5	266.724
		651	54.9316				651	274.048
		651.5	55.542				651.5	278.32
		652	53.1006				652	278.32
		652.5	50.6592				652.5	275.269
		653	51.8799				653	277.1
		653.5	49.4385				653.5	282.593
		654	50.6592				654	283.813
		654.5	49.4385				654.5	280.762
		655	49.4385				655	281.372
		655.5	50.0488				655.5	286.865
		656	51.8799				656	292.969
		656.5	53.1006				656.5	288.086
		657	50.6592				657	285.645
		657.5	53.1006				657.5	291.748
		658	53.1006				658	292.358
		658.5	53.7109				658.5	298.462
		659	54.3213				659	296.021
		659.5	50.6592				659.5	293.579
		660	52.4902				660	296.631
		660.5	52.4902				660.5	297.241
		661	53.1006				661	299.683
		661.5	52.4902				661.5	303.955
		662	51.2695				662	302.124
		662.5	52.4902				662.5	301.514
		663	51.8799				663	304.565
		663.5	51.2695				663.5	313.11
		664	52.4902				664	308.838
		664.5	52.4902				664.5	310.669
		665	53.7109				665	307.007
		665.5	53.1006				665.5	312.5
		666	53.7109				666	314.331
		666.5	56.1523				666.5	316.772
		667	54.9316				667	319.214
		667.5	53.7109				667.5	328.979
		668	57.373				668	330.2
		668.5	55.542				668.5	332.642
		669	53.7109				669	332.031
		669.5	54.9316				669.5	332.642
		670	56.1523				670	336.304
		670.5	54.3213				670.5	338.135
		671	54.9316				671	340.576
		671.5	56.1523				671.5	341.797
		672	56.1523				672	338.745
		672.5	56.1523				672.5	343.628
		673	56.1523				673	337.524
		673.5	53.1006				673.5	345.459
		674	50.6592				674	350.952
		674.5	53.7109				674.5	354.614
		675	55.542				675	354.004
		675.5	54.9316				675.5	355.225
		676	53.7109				676	353.394
		676.5	51.8799				676.5	347.9
		677	52.4902				677	351.562
		677.5	51.2695				677.5	350.952
		678	54.3213				678	363.159
		678.5	51.2695				678.5	364.38
		679	52.4902				679	368.042
		679.5	52.4902				679.5	372.314
		680	53.7109				680	374.146
		680.5	53.1006				680.5	369.263
		681	53.1006				681	365.601
		681.5	52.4902				681.5	371.704
		682	54.3213				682	375.977
		682.5	54.9316				682.5	377.197
		683	51.2695				683	378.418
		683.5	53.7109				683.5	379.028
		684	56.1523				684	383.301
		684.5	56.1523				684.5	387.573
		685	55.542				685	391.235
		685.5	54.3213				685.5	389.404
		686	56.1523				686	394.287
		686.5	52.4902				686.5	396.118
		687	51.8799				687	395.508
		687.5	49.4385				687.5	396.118
		688	52.4902				688	400.391
		688.5	53.1006				688.5	401.001
		689	54.3213				689	401.611
		689.5	52.4902				689.5	406.494
		690	54.3213				690	407.104
		690.5	53.7109				690.5	411.987
		691	54.3213				691	410.767
		691.5	54.9316				691.5	416.26
		692	54.3213				692	413.208
		692.5	53.7109				692.5	411.987
		693	53.1006				693	416.87
		693.5	51.8799				693.5	419.922
		694	48.8281				694	420.532
		694.5	53.1006				694.5	421.753
		695	54.3213				695	427.246
		695.5	53.7109				695.5	425.415
		696	51.8799				696	429.077
		696.5	53.1006				696.5	433.96
		697	55.542				697	437.622
		697.5	53.1006				697.5	437.012
		698	52.4902				698	441.284
		698.5	53.1006				698.5	444.946
		699	51.8799				699	447.998
		699.5	50.6592				699.5	455.933
		700	52.4902				700	453.491
		700.5	53.7109				700.5	450.439
		701	51.2695				701	458.374
		701.5	50.6592				701.5	456.543
		702	51.8799				702	466.309
		702.5	51.2695				702.5	468.14
		703	52.4902				703	476.685
		703.5	53.1006				703.5	477.905
		704	53.7109				704	474.243
		704.5	51.8799				704.5	473.022
		705	52.4902				705	475.464
		705.5	51.2695				705.5	480.347
		706	52.4902				706	482.178
		706.5	51.8799				706.5	488.892
		707	52.4902				707	488.281
		707.5	54.9316				707.5	487.671
		708	52.4902				708	487.671
		708.5	49.4385				708.5	492.554
		709	50.0488				709	495.605
		709.5	51.8799				709.5	499.878
		710	50.6592				710	503.54
		710.5	50.0488				710.5	506.592
		711	50.6592				711	508.423
		711.5	49.4385				711.5	509.644
		712	54.9316				712	513.306
		712.5	52.4902				712.5	508.423
		713	52.4902				713	513.916
		713.5	52.4902				713.5	511.475
		714	53.7109				714	517.578
		714.5	52.4902				714.5	520.02
		715	50.6592				715	516.968
		715.5	52.4902				715.5	516.968
		716	50.6592				716	517.578
		716.5	50.6592				716.5	516.968
		717	52.4902				717	519.409
		717.5	52.4902				717.5	523.682
		718	50.6592				718	524.292
		718.5	51.8799				718.5	541.382
		719	52.4902				719	545.044
		719.5	51.2695				719.5	540.161
		720	52.4902				720	550.537
		720.5	52.4902				720.5	546.265
		721	51.8799				721	541.382
		721.5	51.8799				721.5	546.265
		722	51.8799				722	554.81
		722.5	50.0488				722.5	551.758
		723	52.4902				723	560.303
		723.5	53.1006				723.5	568.237
		724	53.1006				724	563.965
		724.5	53.7109				724.5	566.406
		725	52.4902				725	568.237
		725.5	50.6592				725.5	568.237
		726	51.8799				726	574.951
		726.5	54.9316				726.5	577.393
		727	53.1006				727	573.12
		727.5	51.2695				727.5	581.055
		728	52.4902				728	579.224
		728.5	53.7109				728.5	581.055
		729	53.1006				729	579.834
		729.5	54.9316				729.5	589.6
		730	52.4902				730	581.665
		730.5	52.4902				730.5	593.872
		731	52.4902				731	602.417
		731.5	53.1006				731.5	603.027
		732	53.1006				732	602.417
		732.5	54.3213				732.5	607.91
		733	52.4902				733	599.976
		733.5	56.1523				733.5	610.352
		734	54.3213				734	614.014
		734.5	54.3213				734.5	611.572
		735	54.3213				735	615.845
		735.5	56.1523				735.5	618.896
		736	54.9316				736	626.221
		736.5	56.7627				736.5	625.61
		737	56.1523				737	625
		737.5	56.1523				737.5	626.831
		738	53.7109				738	634.155
		738.5	54.9316				738.5	641.479
		739	55.542				739	635.986
		739.5	57.9834				739.5	639.648
		740	56.1523				740	650.024
		740.5	56.1523				740.5	653.687
		741	54.9316				741	669.556
		741.5	57.373				741.5	667.725
		742	55.542				742	668.945
		742.5	56.1523				742.5	675.049
		743	56.1523				743	674.438
		743.5	54.3213				743.5	684.204
		744	55.542				744	681.152
		744.5	52.4902				744.5	673.828
		745	54.9316				745	679.932
		745.5	53.1006				745.5	668.945
		746	53.7109				746	679.932
		746.5	55.542				746.5	680.542
		747	56.1523				747	678.711
		747.5	56.1523				747.5	683.594
		748	55.542				748	689.087
		748.5	52.4902				748.5	692.749
		749	53.7109				749	693.97
		749.5	51.8799				749.5	700.684
		750	53.7109				750	716.553
		750.5	54.9316				750.5	715.942
		751	54.9316				751	711.06
		751.5	53.7109				751.5	714.722
		752	53.7109				752	719.604
		752.5	54.9316				752.5	717.163
		753	53.7109				753	717.163
		753.5	53.7109				753.5	723.267
		754	53.1006				754	727.539
		754.5	53.1006				754.5	726.318
		755	54.3213				755	725.098
		755.5	53.1006				755.5	732.422
		756	53.1006				756	730.591
		756.5	54.3213				756.5	736.084
		757	53.1006				757	744.019
		757.5	53.1006				757.5	736.694
		758	56.1523				758	746.46
		758.5	54.3213				758.5	744.629
		759	53.1006				759	746.46
		759.5	54.9316				759.5	755.615
		760	55.542				760	755.615
		760.5	53.7109				760.5	755.005
		761	54.9316				761	756.226
		761.5	54.3213				761.5	764.16
		762	55.542				762	769.653
		762.5	54.3213				762.5	780.64
		763	55.542				763	791.626
		763.5	54.9316				763.5	795.898
		764	56.1523				764	787.354
		764.5	57.373				764.5	787.354
		765	55.542				765	795.288
		765.5	54.3213				765.5	797.119
		766	55.542				766	797.729
		766.5	52.4902				766.5	791.626
		767	52.4902				767	805.054
		767.5	52.4902				767.5	801.392
		768	53.7109				768	805.054
		768.5	54.3213				768.5	811.157
		769	54.3213				769	811.157
		769.5	50.6592				769.5	817.871
		770	53.1006				770	816.04
		770.5	53.1006				770.5	820.923
		771	52.4902				771	826.416
		771.5	52.4902				771.5	820.312
		772	52.4902				772	823.364
		772.5	52.4902				772.5	833.74
		773	52.4902				773	834.351
		773.5	51.8799				773.5	836.792
		774	52.4902				774	846.558
		774.5	48.8281				774.5	852.051
		775	49.4385				775	856.323
		775.5	48.8281				775.5	856.323
		776	48.2178				776	858.765
		776.5	48.2178				776.5	863.037
		777	47.6074				777	866.699
		777.5	53.1006				777.5	860.596
		778	52.4902				778	870.361
		778.5	52.4902				778.5	870.361
		779	51.8799				779	872.803
		779.5	50.6592				779.5	871.582
		780	52.4902				780	882.568
		780.5	50.6592				780.5	888.672
		781	54.3213				781	891.724
		781.5	52.4902				781.5	892.944
		782	53.1006				782	891.113
		782.5	51.2695				782.5	893.555
		783	51.8799				783	902.71
		783.5	54.3213				783.5	907.593
		784	53.7109				784	906.372
		784.5	56.1523				784.5	913.086
		785	56.1523				785	911.255
		785.5	54.9316				785.5	923.462
		786	53.1006				786	938.11
		786.5	53.7109				786.5	930.786
		787	54.9316				787	924.683
		787.5	54.3213				787.5	937.5
		788	54.9316				788	938.11
		788.5	52.4902				788.5	935.669
		789	55.542				789	935.669
		789.5	55.542				789.5	938.11
		790	53.7109				790	937.5
		790.5	54.9316				790.5	943.604
		791	55.542				791	951.538
		791.5	56.1523				791.5	961.914
		792	53.1006				792	952.759
		792.5	54.9316				792.5	956.421
		793	51.2695				793	955.2
		793.5	52.4902				793.5	971.069
		794	52.4902				794	978.394
		794.5	53.7109				794.5	971.069
		795	53.1006				795	974.121
		795.5	52.4902				795.5	982.666
		796	52.4902				796	988.77
		796.5	53.7109				796.5	982.666
		797	52.4902				797	982.056
		797.5	52.4902				797.5	989.99
		798	53.7109				798	998.535
		798.5	52.4902				798.5	1013.18
		799	56.1523				799	1015.01
		799.5	56.7627				799.5	1013.79
		800	54.9316				800	1022.34
		800.5	54.9316				800.5	1024.17
		801	54.3213				801	1029.66
		801.5	53.7109				801.5	1029.05
		802	54.3213				802	1035.77
		802.5	52.4902				802.5	1029.66
		803	55.542				803	1035.16
		803.5	54.3213				803.5	1052.25
		804	55.542				804	1057.74
		804.5	56.1523				804.5	1047.36
		805	56.1523				805	1054.69
		805.5	54.9316				805.5	1055.3
		806	54.9316				806	1049.19
		806.5	57.9834				806.5	1051.64
		807	56.1523				807	1069.34
		807.5	57.373				807.5	1062.62
		808	56.7627				808	1074.83
		808.5	57.9834				808.5	1080.93
		809	56.7627				809	1090.7
		809.5	54.3213				809.5	1100.46
		810	56.1523				810	1096.8
		810.5	54.9316				810.5	1102.29
		811	56.1523				811	1098.02
		811.5	54.3213				811.5	1106.57
		812	54.9316				812	1112.67
		812.5	57.373				812.5	1117.55
		813	57.9834				813	1123.66
		813.5	57.373				813.5	1126.71
		814	59.8145				814	1123.05
		814.5	55.542				814.5	1131.59
		815	57.373				815	1127.32
		815.5	56.7627				815.5	1122.44
		816	57.373				816	1135.86
		816.5	54.9316				816.5	1138.92
		817	54.3213				817	1139.53
		817.5	53.1006				817.5	1143.8
		818	54.9316				818	1151.73
		818.5	53.1006				818.5	1157.84
		819	53.7109				819	1152.95
		819.5	54.9316				819.5	1152.95
		820	53.7109				820	1165.77
		820.5	54.3213				820.5	1161.5
		821	55.542				821	1165.16
		821.5	54.9316				821.5	1181.03
		822	56.7627				822	1185.3
		822.5	57.9834				822.5	1188.35
		823	57.373				823	1188.35
		823.5	58.5938				823.5	1184.08
		824	57.9834				824	1185.3
		824.5	54.3213				824.5	1192.63
		825	54.3213				825	1208.5
		825.5	54.3213				825.5	1201.17
		826	55.542				826	1215.82
		826.5	53.7109				826.5	1213.99
		827	54.3213				827	1212.77
		827.5	56.1523				827.5	1212.77
		828	56.1523				828	1216.43
		828.5	55.542				828.5	1224.98
		829	56.1523				829	1214.6
		829.5	55.542				829.5	1217.04
		830	56.7627				830	1226.2
		830.5	57.9834				830.5	1239.01
		831	56.1523				831	1245.73
		831.5	56.1523				831.5	1248.17
		832	58.5938				832	1240.23
		832.5	57.9834				832.5	1250
		833	55.542				833	1259.77
		833.5	56.7627				833.5	1254.27
		834	59.2041				834	1264.04
		834.5	59.2041				834.5	1271.36
		835	59.2041				835	1269.53
		835.5	59.2041				835.5	1278.69
		836	55.542				836	1281.13
		836.5	54.9316				836.5	1287.23
		837	54.9316				837	1290.89
		837.5	54.9316				837.5	1293.33
		838	56.1523				838	1291.5
		838.5	56.1523				838.5	1288.45
		839	54.9316				839	1295.17
		839.5	54.3213				839.5	1307.37
		840	55.542				840	1322.02
		840.5	55.542				840.5	1326.9
		841	53.7109				841	1337.89
		841.5	59.8145				841.5	1326.9
		842	56.7627				842	1329.35
		842.5	55.542				842.5	1339.11
		843	57.373				843	1348.27
		843.5	57.373				843.5	1344.6
		844	57.373				844	1354.37
		844.5	59.8145				844.5	1351.93
		845	60.4248				845	1353.76
		845.5	57.9834				845.5	1348.27
		846	56.7627				846	1353.76
		846.5	57.9834				846.5	1359.86
		847	56.7627				847	1363.53
		847.5	56.7627				847.5	1373.29
		848	54.9316				848	1370.24
		848.5	58.5938				848.5	1381.23
		849	59.2041				849	1381.23
		849.5	59.2041				849.5	1370.24
		850	59.8145				850	1394.65
		850.5	59.8145				850.5	1403.2
		851	61.0352				851	1412.96
		851.5	60.4248				851.5	1406.86
		852	58.5938				852	1417.85
		852.5	57.9834				852.5	1414.79
		853	58.5938				853	1423.34
		853.5	56.1523				853.5	1420.29
		854	56.1523				854	1423.34
		854.5	53.7109				854.5	1414.79
		855	54.9316				855	1427.61
		855.5	51.8799				855.5	1428.83
		856	55.542				856	1442.26
		856.5	52.4902				856.5	1459.35
		857	53.7109				857	1450.81
		857.5	54.3213				857.5	1459.35
		858	54.3213				858	1464.84
		858.5	54.3213				858.5	1467.29
		859	54.9316				859	1473.39
		859.5	56.1523				859.5	1477.05
		860	55.542				860	1475.83
		860.5	53.7109				860.5	1478.88
		861	54.3213				861	1480.1
		861.5	55.542				861.5	1476.44
		862	54.3213				862	1492.31
		862.5	52.4902				862.5	1500.85
		863	55.542				863	1509.4
		863.5	55.542				863.5	1508.79
		864	56.1523				864	1518.55
		864.5	54.9316				864.5	1518.55
		865	54.3213				865	1506.96
		865.5	54.9316				865.5	1505.13
		866	53.7109				866	1508.79
		866.5	57.373				866.5	1515.5
		867	53.1006				867	1527.1
		867.5	56.7627				867.5	1528.32
		868	54.3213				868	1528.32
		868.5	53.7109				868.5	1526.49
		869	53.7109				869	1528.32
		869.5	53.7109				869.5	1531.98
		870	54.9316				870	1541.14
		870.5	55.542				870.5	1539.31
		871	54.9316				871	1543.58
		871.5	56.1523				871.5	1564.94
		872	54.3213				872	1557.62
		872.5	56.1523				872.5	1558.23
		873	53.7109				873	1563.11
		873.5	54.3213				873.5	1564.94
		874	53.7109				874	1575.93
		874.5	53.7109				874.5	1586.91
		875	54.3213				875	1583.86
		875.5	54.3213				875.5	1576.54
		876	56.7627				876	1585.69
		876.5	54.9316				876.5	1594.85
		877	54.9316				877	1607.06
		877.5	55.542				877.5	1610.11
		878	52.4902				878	1612.55
		878.5	54.3213				878.5	1622.92
		879	56.7627				879	1632.08
		879.5	56.1523				879.5	1633.91
		880	54.9316				880	1637.57
		880.5	55.542				880.5	1631.47
		881	57.9834				881	1641.85
		881.5	57.9834				881.5	1643.07
		882	60.4248				882	1659.55
		882.5	61.0352				882.5	1666.26
		883	59.8145				883	1671.14
		883.5	61.0352				883.5	1674.8
		884	61.0352				884	1672.36
		884.5	57.373				884.5	1667.48
		885	58.5938				885	1664.43
		885.5	58.5938				885.5	1682.13
		886	61.0352				886	1672.97
		886.5	60.4248				886.5	1677.86
		887	59.8145				887	1683.96
		887.5	60.4248				887.5	1694.34
		888	62.8662				888	1697.39
		888.5	60.4248				888.5	1696.17
		889	57.9834				889	1696.78
		889.5	59.2041				889.5	1701.66
		890	59.2041				890	1705.93
		890.5	61.6455				890.5	1704.71
		891	59.8145				891	1716.31
		891.5	59.8145				891.5	1712.04
		892	60.4248				892	1723.02
		892.5	57.373				892.5	1718.75
		893	57.373				893	1724.24
		893.5	56.1523				893.5	1740.11
		894	56.7627				894	1736.45
		894.5	59.8145				894.5	1734.62
		895	57.9834				895	1743.77
		895.5	59.8145				895.5	1749.27
		896	59.8145				896	1771.24
		896.5	61.0352				896.5	1761.47
		897	61.0352				897	1776.12
		897.5	61.0352				897.5	1795.04
		898	59.8145				898	1790.16
		898.5	60.4248				898.5	1791.38
		899	59.8145				899	1783.45
		899.5	59.2041				899.5	1794.43
		900	59.8145				900	1788.33
		900.5	59.2041				900.5	1792.6
		901	57.9834				901	1793.82
		901.5	60.4248				901.5	1798.71
		902	57.373				902	1812.13
		902.5	57.9834				902.5	1812.13
		903	56.1523				903	1815.8
		903.5	57.373				903.5	1818.24
		904	57.9834				904	1822.51
		904.5	59.2041				904.5	1832.28
		905	59.8145				905	1838.99
		905.5	59.2041				905.5	1829.22
		906	61.0352				906	1848.75
		906.5	59.2041				906.5	1842.65
		907	57.9834				907	1862.79
		907.5	59.2041				907.5	1857.3
		908	60.4248				908	1872.56
		908.5	61.6455				908.5	1884.77
		909	62.2559				909	1882.32
		909.5	62.2559				909.5	1887.21
		910	61.6455				910	1898.8
		910.5	61.6455				910.5	1900.02
		911	66.5283				911	1914.06
		911.5	64.0869				911.5	1918.95
		912	60.4248				912	1902.47
		912.5	62.2559				912.5	1903.08
		913	61.0352				913	1901.86
		913.5	60.4248				913.5	1906.74
		914	62.2559				914	1931.76
		914.5	61.6455				914.5	1943.36
		915	60.4248				915	1940.92
		915.5	59.8145				915.5	1933.59
		916	61.0352				916	1939.7
		916.5	61.6455				916.5	1943.97
		917	60.4248				917	1962.89
		917.5	62.2559				917.5	1962.28
		918	62.8662				918	1958.62
		918.5	62.8662				918.5	1956.79
		919	60.4248				919	1949.46
		919.5	61.0352				919.5	1971.44
		920	61.6455				920	1983.03
		920.5	61.0352				920.5	1990.97
		921	60.4248				921	1998.9
		921.5	57.9834				921.5	2012.33
		922	60.4248				922	2004.39
		922.5	61.0352				922.5	2017.82
		923	58.5938				923	2003.78
		923.5	61.0352				923.5	2009.89
		924	61.6455				924	2009.28
		924.5	61.0352				924.5	2014.16
		925	58.5938				925	2013.55
		925.5	61.0352				925.5	2025.15
		926	62.8662				926	2047.12
		926.5	61.6455				926.5	2045.29
		927	62.2559				927	2036.13
		927.5	59.8145				927.5	2049.56
		928	61.0352				928	2053.83
		928.5	61.0352				928.5	2049.56
		929	57.9834				929	2069.7
		929.5	62.8662				929.5	2062.99
		930	63.4766				930	2067.26
		930.5	64.0869				930.5	2071.53
		931	61.0352				931	2077.03
		931.5	59.8145				931.5	2082.52
		932	61.6455				932	2086.79
		932.5	59.2041				932.5	2099
		933	61.6455				933	2099
		933.5	61.6455				933.5	2109.38
		934	62.2559				934	2107.54
		934.5	61.0352				934.5	2101.44
		935	59.8145				935	2095.95
		935.5	57.373				935.5	2116.7
		936	60.4248				936	2111.21
		936.5	61.6455				936.5	2111.21
		937	62.8662				937	2112.43
		937.5	59.2041				937.5	2118.53
		938	61.0352				938	2125.24
		938.5	59.2041				938.5	2130.74
		939	60.4248				939	2137.45
		939.5	61.0352				939.5	2149.05
		940	62.8662				940	2158.81
		940.5	58.5938				940.5	2182.01
		941	59.2041				941	2180.79
		941.5	58.5938				941.5	2180.18
		942	57.9834				942	2188.11
		942.5	60.4248				942.5	2174.07
		943	59.8145				943	2186.28
		943.5	61.6455				943.5	2200.93
		944	60.4248				944	2201.54
		944.5	58.5938				944.5	2200.32
		945	59.8145				945	2204.59
		945.5	59.2041				945.5	2197.88
		946	60.4248				946	2216.19
		946.5	59.8145				946.5	2210.08
		947	59.2041				947	2211.3
		947.5	59.2041				947.5	2224.73
		948	55.542				948	2222.29
		948.5	54.3213				948.5	2236.94
		949	56.1523				949	2235.72
		949.5	54.9316				949.5	2233.28
		950	54.3213				950	2247.31
		950.5	56.7627				950.5	2238.77
		951	57.373				951	2245.48
		951.5	59.2041				951.5	2249.76
		952	59.2041				952	2254.64
		952.5	57.9834				952.5	2247.92
		953	59.2041				953	2259.52
		953.5	59.8145				953.5	2265.01
		954	59.8145				954	2275.39
		954.5	58.5938				954.5	2266.85
		955	58.5938				955	2286.99
		955.5	58.5938				955.5	2288.21
		956	59.2041				956	2300.42
		956.5	57.373				956.5	2309.57
		957	57.9834				957	2295.53
		957.5	58.5938				957.5	2297.97
		958	57.9834				958	2301.03
		958.5	57.373				958.5	2286.99
		959	61.6455				959	2303.47
		959.5	58.5938				959.5	2338.26
		960	58.5938				960	2349.24
		960.5	57.9834				960.5	2333.98
		961	57.9834				961	2340.09
		961.5	56.7627				961.5	2338.26
		962	57.9834				962	2351.68
		962.5	57.373				962.5	2349.24
		963	57.9834				963	2344.97
		963.5	59.8145				963.5	2341.92
		964	61.0352				964	2351.07
		964.5	59.2041				964.5	2360.84
		965	60.4248				965	2356.57
		965.5	59.8145				965.5	2381.59
		966	61.0352				966	2386.47
		966.5	61.6455				966.5	2390.14
		967	59.8145				967	2395.02
		967.5	59.8145				967.5	2391.97
		968	61.6455				968	2384.03
		968.5	60.4248				968.5	2410.28
		969	60.4248				969	2396.85
		969.5	59.8145				969.5	2385.25
		970	59.8145				970	2404.17
		970.5	61.0352				970.5	2412.72
		971	62.2559				971	2401.73
		971.5	60.4248				971.5	2411.5
		972	58.5938				972	2427.37
		972.5	60.4248				972.5	2437.74
		973	61.6455				973	2431.03
		973.5	64.0869				973.5	2442.63
		974	59.8145				974	2446.9
		974.5	60.4248				974.5	2429.81
		975	60.4248				975	2448.12
		975.5	61.6455				975.5	2457.28
		976	61.6455				976	2443.85
		976.5	58.5938				976.5	2449.34
		977	59.2041				977	2469.48
		977.5	61.0352				977.5	2477.42
		978	57.9834				978	2457.28
		978.5	59.2041				978.5	2463.38
		979	59.8145				979	2473.75
		979.5	60.4248				979.5	2479.86
		980	59.2041				980	2487.18
		980.5	59.8145				980.5	2515.87
		981	60.4248				981	2515.87
		981.5	63.4766				981.5	2501.83
		982	63.4766				982	2506.71
		982.5	63.4766				982.5	2504.27
		983	62.2559				983	2503.66
		983.5	59.2041				983.5	2514.65
		984	59.2041				984	2529.3
		984.5	57.373				984.5	2512.21
		985	58.5938				985	2508.54
		985.5	59.8145				985.5	2506.1
		986	57.9834				986	2512.21
		986.5	58.5938				986.5	2515.26
		987	56.1523				987	2535.4
		987.5	57.9834				987.5	2532.96
		988	58.5938				988	2546.39
		988.5	62.2559				988.5	2547.61
		989	58.5938				989	2549.44
		989.5	59.8145				989.5	2547.61
		990	59.8145				990	2552.49
		990.5	59.2041				990.5	2560.42
		991	61.0352				991	2578.74
		991.5	57.373				991.5	2587.28
		992	56.7627				992	2592.16
		992.5	56.1523				992.5	2588.5
		993	58.5938				993	2583.62
		993.5	60.4248				993.5	2595.83
		994	60.4248				994	2578.74
		994.5	59.2041				994.5	2581.79
		995	60.4248				995	2604.37
		995.5	61.6455				995.5	2606.2
		996	61.0352				996	2604.37
		996.5	59.2041				996.5	2599.49
		997	57.373				997	2595.83
		997.5	57.373				997.5	2606.81
		998	57.9834				998	2623.9
		998.5	60.4248				998.5	2621.46
		999	61.0352				999	2639.16
[truncated: 8,001 more rows]

## Sheet: Figure 2K
					Control current at +60 mV								Control current at +60 mV									Control current at +60 mV
Constructs		Date	Filename	Cap	Current(pA)	Density(pA/pF)		Constructs		Date	Filename	Cap	Current(pA)	Density(pA/pF)			Constructs		Date	Filename	Cap	Current(pA)	Density(pA/pF)
Q1-YFP+E1+Nano		2017-10-19	2017_10_19_0014	52	7198.2	138.427		Q1-YFP+E1+Nano-Cα		2017-10-11	2017_10_11_0000	32	302.1	9.44063			Q1-YFP+E1+ Ca[T198A]		2018-01-18	2018_01_18_0010	26	4823.6	185.523
		2017-10-19	2017_10_19_0016	46.2	9077.9	196.491				2017-10-11	2017_10_11_0001	16	95.7	5.98125					2018-01-18	2018_01_18_0012	47.77	6033.9	126.311
		2017-10-19	2017_10_19_0018	24	2664.8	111.033				2017-10-11	2017_10_11_0003	16.46	107.1	6.50668					2018-01-18	2018_01_18_0014	24	2197.3	91.5542
		2017-10-19	2017_10_19_0022	13	5086.1	391.238				2017-10-11	2017_10_11_0005	36.1	159.6	4.42105					2018-01-18	2018_01_18_0015	30	9447.6	314.92
		2017-10-19	2017_10_19_0024	28	3628.5	129.589				2017-10-12	2017_10_12_0000	21.5	130.6	6.07442					2018-01-18	2018_01_18_0017	18	808.1	44.8944
		2017-10-19	2017_10_19_0027	36.56	3036.8	83.0635				2017-10-12	2017_10_12_0004	22.6	195.1	8.63274					2018-01-19	2018_01_19_0001	24	6922	288.417
		2017-10-19	2017_10_19_0028	38	7634.9	200.918				2017-10-12	2017_10_12_0005	64	578	9.03125					2018-01-19	2018_01_19_0002	27	8286.1	306.893
		2017-10-19	2017_10_19_0031	24	12917.8	538.242				2017-10-12	2017_10_12_0008	36	369.6	10.2667					2018-01-19	2018_01_19_0004	34	10812.4	318.012
		2017-10-20	2017_10_20_0013	17.08	4694.2	274.836				2017-10-12	2017_10_12_0011	15	324.3	21.62					2018-01-19	2018_01_19_0005	20	4785.8	239.29
		2017-10-20	2017_10_20_0014	23	11205.8	487.209				2017-09-27	2017_09_27_0000	35	184.3	5.26571					2018-01-19	2018_01_19_0006	30	2912.6	97.0867
		2017-10-20	2017_10_20_0015	41.76	3192.4	76.4464				2017-09-27	2017_09_27_0002	75	809.7	10.796
		2017-10-20	2017_10_20_0017	13.25	2455.6	185.328				2017-09-27	2017_09_27_0010	42	111	2.64286
		2017-10-20	2017_10_20_0019	30.84	8869.4	287.594				2017-09-27	2017_09_27_0011	40	129.4	3.235
		2017-10-11	2017_10_11_0024	57	4471.5	78.4474				2017-09-27	2017_09_27_0013	23	735.5	31.9783
		2017-10-11	2017_10_11_0025	12	942.8	78.5667				2017-09-28	2017_09_28_0000	69.5	456.9	6.5741
		2017-10-11	2017_10_11_0028	65	5145.3	79.1585				2017-09-28	2017_09_28_0001	18	36.6	2.03333
		2017-10-11	2017_10_11_0030	16	2838.1	177.381				2017-09-28	2017_09_28_0004	14.1	117.8	8.35461
		2017-10-11	2017_10_11_0032	17.57	2997.8	170.62				2017-09-28	2017_09_28_0010	18	167.8	9.32222
		2017-10-11	2017_10_11_0034	26	4605.4	177.131				2017-09-28	2017_09_28_0012	17.5	188	10.7429
		2017-10-11	2017_10_11_0035	35	2979	85.1143					Average	32.1979	273.637	9.10103						Average	28.077	5702.94	201.29
		2017-10-12	2017_10_12_0031	20	12535.4	626.77					SEM	4.35053	51.0922	1.60651						SEM	2.65789	1022.23	33.3255
		2017-10-12	2017_10_12_0032	68	6107.6	89.8176
		2017-10-12	2017_10_12_0034	46	8305.5	180.554
		2017-10-12	2017_10_12_0037	48	3202.9	66.7271
		2017-10-12	2017_10_12_0039	29	7102.8	244.924
		2017-10-12	2017_10_12_0041	40.9	6292.6	153.853
			Average	33.3908	5738.04	204.211
			SEM	3.15457	631.713	29.5581

## Sheet: STATISTICS
		Q1-YFP+E1+nano	Q1-YFP+E1+nano-Calpha	Q1-YFP+E1+nano-Calpha[T198A]
		138.427	9.44063	185.523
		196.491	5.98125	126.311
		111.033	6.50668	91.5542				Anova: Single Factor
		391.238	4.42105	314.92
		129.589	6.07442	44.8944				SUMMARY
		83.0635	8.63274	288.417				Groups	Count	Sum	Average	Variance
		200.918	9.03125	306.893				Column 1	26	5309.48	204.211	22715.7
		538.242	10.2667	318.012				Column 2	19	172.92	9.10103	49.0365
		274.836	21.62	239.29				Column 3	10	2012.9	201.29	11105.9
		487.209	5.26571	97.0867
		76.4464	10.796
		185.328	2.64286					ANOVA
		287.594	3.235					Source of Variation	SS	df	MS	F	P-value	F crit
		78.4474	31.9783					Between Groups	469558	2	234779	18.2563	9.8618e-07	3.17514
		78.5667	6.5741					Within Groups	668729	52	12860.2
		79.1585	2.03333
		177.381	8.35461					Total	1.13829e+06	54
		170.62	9.32222
		177.131	10.7429
		85.1143
		626.77
		89.8176
		180.554
		66.7271
		244.924
		153.853
