# Supplementary material for: Divergent regulation of KCNQ1/E1 by targeted recruitment of protein kinase A to distinct sites on the channel complex
Source: eLife journal article supplement (doi:10.7554/elife.83466), 2023-08-31
Supplement: supp [file Figure 3 - source data 1.xlsx]

## Sheet: Figure 3B - 3D
			Geometric Mean BTX-647
		N	nano	nanoCalpha	nanoRIIalpha
	BBS-Q1+E1	1	1350	2967	831
		2	1426	2706	649
		3	1345	2979	1407
		4	1815	3156	2173
		5	1592	2513	1905
		Mean	1505.6	2864.2	1393
		SEM	79.8832	101.442	263.827
	one-way anova	p	0.0001
		Tukey HSD Post-hoc Test...
		Group 1 vs Group 2: Diff=1358.6000, 95%CI=718.7868 to 1998.4132, p=0.0003
		Group 1 vs Group 3: Diff=-112.6000, 95%CI=-752.4132 to 527.2132, p=0.8867
		Group 2 vs Group 3: Diff=-1471.2000, 95%CI=-2111.0132 to -831.3868, p=0.0001

## Sheet: Figure 3F and 3H  
			Geometric Mean BTX-647
		N	nano	nanoCalpha	nanoRIIalpha
	BBS-Q1+E1-YFP	1	1845	2909	2598
		2	1961	2912	2647
		3	1957	2924	2704
		4	1698	2561	2807
		5	2955	3544	3107
		Mean	2083.2	2970	2772.6
		SEM	199.601	142.261	80.9872
	one-way anova	p	0.003
		Tukey HSD Post-hoc Test...
		Group 1 vs Group 2: Diff=887.0000, 95%CI=324.6875 to 1449.3125, p=0.0032
		Group 1 vs Group 3: Diff=689.6000, 95%CI=127.2875 to 1251.9125, p=0.0170
		Group 2 vs Group 3: Diff=-197.4000, 95%CI=-759.7125 to 364.9125, p=0.6286

## Sheet: Figure 3J and 3L
			Geometric Mean BTX-647
		N	nano	nanoCalpha	nanoRIIalpha
	BBS-Q1-YFP+E1	1	2641	1156	471
		2	2689	1443	386
		3	2545	934	531
		4	4819	587	727
		5	6458	780	2435
		Mean	3830.4	980	910
		SEM	700.038	132.953	344.677
	one-way anova	p	0.0009
		Tukey HSD Post-hoc Test...
		Group 1 vs Group 2: Diff=-2850.4000, 95%CI=-4574.6096 to -1126.1904, p=0.0023
		Group 1 vs Group 3: Diff=-2920.4000, 95%CI=-4644.6096 to -1196.1904, p=0.0019
		Group 2 vs Group 3: Diff=-70.0000, 95%CI=-1794.2096 to 1654.2096, p=0.9936
