# Supplementary material for: Divergent regulation of KCNQ1/E1 by targeted recruitment of protein kinase A to distinct sites on the channel complex
Source: eLife journal article supplement (doi:10.7554/elife.83466), 2023-08-31
Supplement: supp [file Figure 5 - source data 1.xlsx]

## Sheet: Figure 5B
	BBS-Q1-YFP+E1+nano-FKBP+FRB-Calpha
	plus rapamycin	t = 0	20 min	60	180	360	1200
	Number of cells (CFP positive)	13976	12373	12405	12026	12423	13292
	Mean BTX-647	1038	1143	1051	937	776	472
	SD	1539	1644	1533	1387	1133	849
	SEM	13.0181	14.7797	13.764	12.6478	10.1652	7.36398
	Mean YFP	299	325	324	338	342	376
	SD	325	327	329	343	358	385
	SEM	2.74911	2.93975	2.95391	3.12776	3.21196	3.33938

## Sheet: Figure 5C
Mean 647	Time	Expt 1	Expt 2	Expt 3		Bkgd					Norm	Time	Expt 1	Expt 2	Expt 3		mean	sem
	0	901	1478	1038		4						0	1	1	1		1	0
	20	885	1257	1143								20	0.986622	0.852782	1.10542		0.981606	0.0729723
	60	873	1236	1051								60	0.973244	0.838535	1.01644		0.94274	0.0535741
	180	745	1144	937								180	0.830546	0.776119	0.90619		0.837618	0.0377142
	360	623	917	776								360	0.694537	0.622117	0.750484		0.689046	0.0371579
	1200	317	529	472								1200	0.3534	0.358887	0.45648		0.389589	0.0334828

## Sheet: Figure 5D
Mean YFP	Time	Expt 1	Expt 2	Expt 3		Bkgd					Norm	Time	Expt 1	Expt 2	Expt 3		mean	sem
	0	281	311	299		10						0	1	1	1		1	0
	20	287	285	325								20	1.05904	0.946844	1.12457		1.04348	0.0518907
	60	299	295	324								60	1.10332	0.980066	1.12111		1.06816	0.0443475
	180	290	319	338								180	1.07011	1.0598	1.16955		1.09982	0.0349916
	360	299	325	342								360	1.10332	1.07973	1.18339		1.12215	0.031369
	1200	318	404	376								1200	1.17343	1.34219	1.30104		1.27222	0.0508032

## Sheet: Figure 5F
		Q1-YFP+E1+Nano-FKBP/Ca-FRB, without Rapamycin treatment								Q1-YFP+E1+Nano-FKBP/Ca-FRB, Treat with 1 uM Rapamycin over 20h
			File	Peak current (pA)	Cm (pF)	Current density (pA/pF)					File	Peak current (pA)	Cm (pF)	Current density (pA/pF)
		cell 1	2019_11_19_0001	9296.9	48	193.685				cell 1	2019_11_19_0012	2960	30	98.6667
		cell 2	2019_11_19_0003	7260.1	25	290.404				cell 2	2019_11_19_0013	3535.8	59	59.9288
		cell 3	2019_11_19_0005	11037	55	200.673				cell 3	2019_11_19_0014	4059	29	139.966
		cell 4	2019_11_19_0007	11620	65	178.769				cell 4	2019_11_19_0016	1609	50	32.18
		cell 5	2019_11_19_0009	5834.4	30	194.48				cell 5	2019_11_19_0020	5881	97	60.6289
		cell 6	2019_11_19_0011	8357.5	40	208.938				cell 6	2019_11_19_0021	6118	52	117.654
		cell 7	2019_11_20_0000	7871	18	437.278				cell 7	2019_11_19_0023	4248	48	88.5
		cell 8	2019_11_20_0002	9666.1	43	224.793				cell 8	2019_11_20_0013	6135	35	175.286
		cell 9	2019_11_20_0004	9702	35	277.2				cell 9	2019_11_20_0015	3565	39	91.4103
		cell 10	2019_11_20_0008	10541	37	284.892				cell 10	2019_11_20_0017	5660	49	115.51
		cell 11	2019_11_20_0009	13925	35	397.857				cell 11	2019_11_20_0019	2771	30	92.3667
		cell 12	2019_11_20_0010	9696	33	293.818				cell 12	2019_11_20_0021	4868	35	139.086
		cell 13	2019_11_20_0012	11022	42	262.429				cell 13	2019_11_20_0022	3218	32	100.562
					Average	265.017				cell 14	2019_11_20_0024	9081	91	99.7912
					SEM	22.0358							Average	100.824
					P value	3.44917e-06							SEM	9.76577

## Sheet: Figure 5G
	KCNQ1-YFP+KCNE1,WITHOUT Rapamycin treatment								KCNQ1-YFP+KCNE1, Treat with 1 uM Rapamycin over 20h
		File	Peak current (pA)	Cm (pF)	Current density (pA/pF)					File	Peak current (pA)	Cm (pF)	Current density (pA/pF)
	cell 1	2019_11_26_0000	7257.1	28	259.182				cell 1	2019_11_26_0012	3826	27	141.704
	cell 2	2019_11_26_0001	6265.3	40	156.632				cell 2	2019_11_26_0015	6918	35	197.657
	cell 3	2019_11_26_0003	10490	32	327.812				cell 3	2019_11_26_0018	9828	26	378
	cell 4	2019_11_26_0005	9561.2	48	199.192				cell 4	2019_11_26_0020	8920	30	297.333
	cell 5	2019_11_26_0006	5460.2	20	273.01				cell 5	2019_11_26_0021	3235	21	154.048
	cell 6	2019_11_26_0007	7350	43	170.93				cell 6	2019_11_26_0022	9160	46	199.13
	cell 7	2019_11_26_0008	9490	38	249.737				cell 7	2019_11_26_0023	11000	24	458.333
	cell 8	2019_11_26_0010	5276	23	229.391				cell 8	2019_11_26_0024	10311	39	264.385
				Average	233.236				cell 9	2019_11_26_0026	1445	28	51.6071
				SEM	19.9982							Average	238.022
				P value	0.919731							SEM	41.9267
