# Supplementary material for: Divergent regulation of KCNQ1/E1 by targeted recruitment of protein kinase A to distinct sites on the channel complex
Source: eLife journal article supplement (doi:10.7554/elife.83466), 2023-08-31
Supplement: supp [file Figure 6 - source data 1.xlsx]

## Sheet: PeptideGroups
Annotated Sequence	Modifications	Modifications (all possible sites)	Qvality PEP	Qvality q-value	# Protein Groups	# Proteins	# PSMs	Master Protein Accessions	Positions in Master Proteins	Modifications in Master Proteins (all Sites)	Modifications in Master Proteins	Master Protein Descriptions	Protein Accessions	# Missed Cleavages	Theo. MH+ [Da]	Abundances : Q1YFP_gnano_dimer	Abundances : Q1YFP_gnano_mono	Abundances: Q1YFP_nanoCa_dimer	Abundances : Q1YFP_nanoCa_mono	Abundances : Q1YFP_PKACa_dimer	Abundances : Q1YFP_PKACa_mono	Abundances: UT_dimer	Abundances : UT_Mono	Quan Info	Found in Sample: [S12] F12: Sample, Q1YFP_gnano_dimer	Found in Sample: [S16] F16: Sample, Q1YFP_gnano_mono	Found in Sample: [S11] F11: Sample, Q1YFP_nanoCa_dimer	Found in Sample: [S15] F15: Sample, Q1YFP_nanoCa_mono	Found in Sample: [S10] F10: Sample, Q1YFP_PKACa_dimer	Found in Sample: [S14] F14: Sample, Q1YFP_PKACa_mono	Found in Sample: [S9] F9: Sample, UT_dimer	Found in Sample: [S13] F13: Sample, UT_Mono	Confidence (by Search Engine): Sequest HT	Percolator q-Value (by Search Engine): Sequest HT	Percolator PEP (by Search Engine): Sequest HT	XCorr (by Search Engine): Sequest HT	Top Apex RT [min]
[K].AAAAAAALQAK.[S]			0.000155224	9.16411e-05	1	1	4	P36578	P36578 [354-364]			60S ribosomal protein L4 OS=Homo sapiens OX=9606 GN=RPL4 PE=1 SV=5	P36578	0	956.552	158074							133980		High	Not Found	High	Not Found	High	Not Found	Not Found	High	High	3.781e-05	2.165e-05	2.85	34.53
[K].IQNDIIDILLTFTQGVNEK.[L]			2.41497e-05	9.16411e-05	1	4	5	Q69YN4	Q69YN4 [1060-1078]			Protein virilizer homolog OS=Homo sapiens OX=9606 GN=VIRMA PE=1 SV=2	Q69YN4-4; Q69YN4-3; Q69YN4-2; Q69YN4	0	2174.17	236896		1098285		780499					High	Not Found	High	Not Found	High	Not Found	High	Not Found	High	3.781e-05	2.469e-06	4.35	88.75
[K].LQNLFVDDSGR.[Y]			5.53276e-05	9.16411e-05	1	1	4	Q6P3X3	Q6P3X3 [217-227]			Tetratricopeptide repeat protein 27 OS=Homo sapiens OX=9606 GN=TTC27 PE=1 SV=1	Q6P3X3	0	1263.63		1.22451e+06		918341		454855		693116		Not Found	High	Not Found	High	Not Found	High	Not Found	High	High	3.781e-05	6.492e-06	2.95	58.55
[R].LQNPAITGPAVPYSR.[E]			8.45187e-05	9.16411e-05	1	8	2	Q96PU5	Q96PU5 [581-595]			E3 ubiquitin-protein ligase NEDD4-like OS=Homo sapiens OX=9606 GN=NEDD4L PE=1 SV=2	Q96PU5-7; Q96PU5-5; Q96PU5-2; Q96PU5-9; Q96PU5-3; Q96PU5; Q96PU5-4; Q96PU5-6	0	1583.85									No Quan Values	Not Found	High	Not Found	High	Not Found	Not Found	Not Found	Not Found	High	3.781e-05	1.064e-05	3.86
[R].IQNSSGTDYPDIHAAAK.[E]			2.98414e-06	9.16411e-05	1	2	1	P50748	P50748 [1786-1802]			Kinetochore-associated protein 1 OS=Homo sapiens OX=9606 GN=KNTC1 PE=1 SV=1	P50748-2; P50748	0	1787.86					371524					Not Found	Not Found	Not Found	Not Found	High	Not Found	Not Found	Not Found	High	3.781e-05	2.129e-07	4.02	41.27
[K].LQNVEQLPPDEIK.[E]			1.76563e-05	9.16411e-05	1	1	9	Q92621	Q92621 [1840-1852]			Nuclear pore complex protein Nup205 OS=Homo sapiens OX=9606 GN=NUP205 PE=1 SV=3	Q92621	0	1522.81	1.6058e+06		823374		873047		512355			High	Not Found	High	Not Found	High	Not Found	High	Not Found	High	3.781e-05	1.703e-06	3.89	54.06
[K].LQNVEQLPPDEIKELCQSVMPAGVDK.[I]	1xCarbamidomethyl [C16]	1xCarbamidomethyl [C16]	2.45929e-06	9.16411e-05	1	1	3	Q92621	Q92621 [1840-1865]			Nuclear pore complex protein Nup205 OS=Homo sapiens OX=9606 GN=NUP205 PE=1 SV=3	Q92621	1	2937.47	1.02387e+06		438437		236030					High	Not Found	Peak Found	Not Found	High	Not Found	Not Found	Not Found	High	3.781e-05	1.699e-07	5.12	74.14
[K].LQNVEQLPPDEIKELCQSVMPAGVDK.[I]	1xCarbamidomethyl [C16]; 1xOxidation [M20]	1xCarbamidomethyl [C16]; 1xOxidation [M20]	1.05409e-05	9.16411e-05	1	1	6	Q92621	Q92621 [1840-1865]			Nuclear pore complex protein Nup205 OS=Homo sapiens OX=9606 GN=NUP205 PE=1 SV=3	Q92621	1	2953.46	3.12246e+06		1.60335e+06		933147		381673			High	Not Found	High	Not Found	High	Not Found	High	Not Found	High	3.781e-05	9.289e-07	5.01	69.08
[R].LQNVLDLTGSDNK.[G]			0.00013151	9.16411e-05	1	3	1	Q7Z7A1	Q7Z7A1 [1094-1106]			Centriolin OS=Homo sapiens OX=9606 GN=CNTRL PE=1 SV=2	Q7Z7A1; Q7Z7A1-5; Q7Z7A1-2	0	1416.73							66447.4			Not Found	Not Found	Not Found	Not Found	Not Found	Not Found	High	Not Found	High	3.781e-05	1.779e-05	2.53	60.73
[K].LQNYGELGPGTTGASSSGAGLHWGGPTQSSAYGK.[L]	1xDeamidated [N3]	1xDeamidated [N3]	1.36423e-05	9.16411e-05	1	2	1	Q9NYV4	Q9NYV4 [1437-1470]			Cyclin-dependent kinase 12 OS=Homo sapiens OX=9606 GN=CDK12 PE=1 SV=2	Q9NYV4-2; Q9NYV4	0	3294.53	301834		452037				264759			Peak Found	Not Found	High	Not Found	Not Found	Not Found	Peak Found	Not Found	High	3.781e-05	1.261e-06	4.85	60.83
[R].LQPEEADVPAYPK.[V]			4.55969e-05	9.16411e-05	1	1	1	Q9BTC0	Q9BTC0 [1218-1230]			Death-inducer obliterator 1 OS=Homo sapiens OX=9606 GN=DIDO1 PE=1 SV=5	Q9BTC0	0	1456.73			174869		179593		65085.4			Not Found	Not Found	Peak Found	Not Found	High	Not Found	Peak Found	Not Found	High	3.781e-05	5.173e-06	2.32	51.65
[K].LQPFATEADVEEALR.[L]			2.26363e-06	9.16411e-05	1	1	5	P33992	P33992 [628-642]			DNA replication licensing factor MCM5 OS=Homo sapiens OX=9606 GN=MCM5 PE=1 SV=5	P33992	0	1688.85		2.89186e+07		5.65499e+06		1.48497e+07		1.03685e+07		Not Found	High	Not Found	High	Not Found	High	Not Found	High	High	3.781e-05	1.541e-07	4.62	72.09
[R].LQPFHSTELEDDAIYSVHVPAGLYR.[I]			2.04551e-06	9.16411e-05	1	2	5	Q9Y2X7	Q9Y2X7 [531-555]			ARF GTPase-activating protein GIT1 OS=Homo sapiens OX=9606 GN=GIT1 PE=1 SV=2	Q9Y2X7; Q9Y2X7-3	0	2857.42		1.42053e+06		1.15609e+06		723223		1.13333e+06		Not Found	High	Not Found	High	Not Found	High	Not Found	High	High	3.781e-05	1.36e-07	5.41	70.92
[K].IQPGSQQADFLDALIVSMDVIQHETIGK.[K]			2.90066e-09	9.16411e-05	1	1	3	P13010	P13010 [98-125]			X-ray repair cross-complementing protein 5 OS=Homo sapiens OX=9606 GN=XRCC5 PE=1 SV=3	P13010	0	3053.56		3.5431e+06				6104942				Not Found	High	Not Found	Not Found	Not Found	High	Not Found	Not Found	High	3.781e-05	6.332e-11	5.74	87.53
[K].IQPGSQQADFLDALIVSMDVIQHETIGKK.[F]	1xOxidation [M18]	1xOxidation [M18]	3.48915e-07	9.16411e-05	1	1	2	P13010	P13010 [98-126]			X-ray repair cross-complementing protein 5 OS=Homo sapiens OX=9606 GN=XRCC5 PE=1 SV=3	P13010	1	3197.65		1.63129e+06				2.17596e+06		498819		Not Found	Peak Found	Not Found	Not Found	Not Found	High	Not Found	High	High	3.781e-05	1.716e-08	7.39	82.74
[R].IQPVHILTSVSSLR.[G]			1.65537e-05	9.16411e-05	1	3	4	Q15910	Q15910 [65-78]			Histone-lysine N-methyltransferase EZH2 OS=Homo sapiens OX=9606 GN=EZH2 PE=1 SV=2	Q15910; Q15910-2; Q15910-3	0	1549.91		852131		847311		353253	46388.9	595206		Not Found	High	Not Found	High	Not Found	High	Peak Found	High	High	3.781e-05	1.587e-06	3.47	60.12
[K].IQQAIENVDFSTAK.[K]			4.81771e-06	9.16411e-05	1	1	2	P50748	P50748 [172-185]			Kinetochore-associated protein 1 OS=Homo sapiens OX=9606 GN=KNTC1 PE=1 SV=1	P50748	0	1563.8					390412					Not Found	Not Found	Not Found	Not Found	High	Not Found	Not Found	Not Found	High	3.781e-05	3.702e-07	3.62	55.42
[R].LQQEETQLEQSIQAGR.[V]			7.09347e-06	9.16411e-05	1	4	2	Q9UBC2	Q9UBC2 [508-523]			Epidermal growth factor receptor substrate 15-like 1 OS=Homo sapiens OX=9606 GN=EPS15L1 PE=1 SV=1	Q9UBC2; Q9UBC2-2; Q9UBC2-3; Q9UBC2-4	0	1857.93	704950	7.69518e+06	477132	6.61852e+06	695692	1.61685e+06	478905	536297		Peak Found	Peak Found	Peak Found	High	Peak Found	Peak Found	Peak Found	High	High	3.781e-05	5.846e-07	1.92	54.71
[R].LQQELDDLLVDLDHQR.[Q]			3.86122e-07	9.16411e-05	1	1	4	P35579	P35579 [1418-1433]			Myosin-9 OS=Homo sapiens OX=9606 GN=MYH9 PE=1 SV=4	P35579	0	1949.99	123885		328758		631585		189367			High	Not Found	High	Not Found	High	Not Found	High	Not Found	High	3.781e-05	1.932e-08	4.36	76.4
[R].LQQELDDLTVDLDHQR.[Q]			1.53703e-07	9.16411e-05	1	5	1	P35580	P35580 [1425-1440]			Myosin-10 OS=Homo sapiens OX=9606 GN=MYH10 PE=1 SV=3	P35580-2; P35580; P35580-5; P35580-3; P35580-4	0	1937.96									No Quan Values	Not Found	Not Found	Not Found	Not Found	High	Not Found	Not Found	Not Found	High	3.781e-05	6.596e-09	4.22
[K].IQMMQLQSTDPYLDDFYYQNYFEK.[L]	1xDeamidated [Q7]; 2xOxidation [M3; M4]	1xDeamidated [Q7]; 2xOxidation [M3; M4]	0.000558282	9.16411e-05	1	3	1	Q86TB9	Q86TB9 [416-439]			Protein PAT1 homolog 1 OS=Homo sapiens OX=9606 GN=PATL1 PE=1 SV=2	Q86TB9-4; Q86TB9-2; Q86TB9	0	3113.34									No Quan Values	Not Found	High	Not Found	Not Found	Not Found	Not Found	Not Found	Not Found	High	3.781e-05	9.674e-05	3.01
[K].IQMMQLQSTDPYLDDFYYQNYFEK.[L]	2xOxidation [M3; M4]	2xOxidation [M3; M4]	0.000165561	9.16411e-05	1	3	2	Q86TB9	Q86TB9 [416-439]			Protein PAT1 homolog 1 OS=Homo sapiens OX=9606 GN=PATL1 PE=1 SV=2	Q86TB9-4; Q86TB9-2; Q86TB9	0	3112.36									No Quan Values	Not Found	Not Found	Not Found	High	Not Found	Not Found	Not Found	High	High	3.781e-05	2.339e-05	2.6
[R].LQMILNEIQPR.[D]	1xOxidation [M3]	1xOxidation [M3]	0.000664989	9.16411e-05	1	3	4	Q6YHU6	Q6YHU6 [988-998]			Thyroid adenoma-associated protein OS=Homo sapiens OX=9606 GN=THADA PE=1 SV=1	Q6YHU6-2; Q6YHU6-3; Q6YHU6	0	1370.75	750182	786833	573100		289094		118389			High	Peak Found	High	Not Found	High	Not Found	High	Not Found	High	3.781e-05	0.0001197	2.9	59.06
[R].LQMILNEIQPR.[D]			6.01097e-05	9.16411e-05	1	3	4	Q6YHU6	Q6YHU6 [988-998]			Thyroid adenoma-associated protein OS=Homo sapiens OX=9606 GN=THADA PE=1 SV=1	Q6YHU6-2; Q6YHU6-3; Q6YHU6	0	1354.75	899977		609403							High	Not Found	High	Not Found	High	Not Found	High	Not Found	High	3.781e-05	7.16e-06	3.12	66.41
[R].IQFNDLQSLLCATLQNVLR.[K]	1xCarbamidomethyl [C11]	1xCarbamidomethyl [C11]	2.00817e-06	9.16411e-05	1	2	8	Q14974	Q14974 [575-593]			Importin subunit beta-1 OS=Homo sapiens OX=9606 GN=KPNB1 PE=1 SV=2	Q14974; Q14974-2	0	2246.2		10352502		3.52126e+06						Not Found	High	Not Found	High	Not Found	High	Not Found	High	High	3.781e-05	1.337e-07	3.6	89.54
[R].LQFQQQQNSIHAAK.[Q]			0.000460137	9.16411e-05	1	8	2	Q6PJT7	Q6PJT7 [232-245]			Zinc finger CCCH domain-containing protein 14 OS=Homo sapiens OX=9606 GN=ZC3H14 PE=1 SV=1	Q6PJT7-10; Q6PJT7-3; Q6PJT7; Q6PJT7-4; Q6PJT7-11; Q6PJT7-5; Q6PJT7-2; Q6PJT7-9	0	1640.85				1.32435e+06				295419		Not Found	Not Found	Not Found	High	Not Found	Not Found	Not Found	High	High	3.781e-05	7.73e-05	2.11	36.45
[R].LQGINCGPDFTPSFANLGR.[T]	1xCarbamidomethyl [C6]	1xCarbamidomethyl [C6]	1.52218e-09	9.16411e-05	2	8	10	Q04637-8; Q04637-4	Q04637-8 [657-675]; Q04637-4 [570-588]			Isoform 8 of Eukaryotic translation initiation factor 4 gamma 1 OS=Homo sapiens OX=9606 GN=EIF4G1 Isoform C of Eukaryotic translation initiation factor 4 gamma 1 OS=Homo sapiens OX=9606 GN=EIF4G1	Q04637-6; Q04637-9; Q04637; Q04637-3; Q04637-8; Q04637-4; Q04637-5; Q04637-7	0	2064	2387929		3.86764e+06		2.20164e+06		1.1667e+06		Shared	High	Not Found	High	Not Found	High	Not Found	High	Not Found	High	3.781e-05	2.959e-11	5.56	74.89
[R].LQGISFGMYSAEELK.[K]	1xOxidation [M8]	1xOxidation [M8]	3.15444e-05	9.16411e-05	1	1	1	O95602	O95602 [12-26]			DNA-directed RNA polymerase I subunit RPA1 OS=Homo sapiens OX=9606 GN=POLR1A PE=1 SV=2	O95602	0	1688.82		1.50111e+06	1.56958e+06	1.49297e+06	1.17798e+06	1.10714e+06	1.22787e+06	1.67412e+06		Not Found	Peak Found	High	Peak Found	Peak Found	Peak Found	Peak Found	Peak Found	High	3.781e-05	3.372e-06	4.07	67.18
[R].LQGISFGMYSAEELKK.[L]			1.56599e-06	9.16411e-05	1	1	2	O95602	O95602 [12-27]			DNA-directed RNA polymerase I subunit RPA1 OS=Homo sapiens OX=9606 GN=POLR1A PE=1 SV=2	O95602	1	1800.92	362224		559284	176542	194794					Peak Found	Not Found	High	Peak Found	High	Not Found	Not Found	Not Found	High	3.781e-05	9.972e-08	5.13	62.29
[R].LQGISFGMYSAEELKK.[L]	1xOxidation [M8]	1xOxidation [M8]	2.04551e-06	9.16411e-05	1	1	4	O95602	O95602 [12-27]			DNA-directed RNA polymerase I subunit RPA1 OS=Homo sapiens OX=9606 GN=POLR1A PE=1 SV=2	O95602	1	1816.91	1.30444e+06	974392	2.00054e+06		788876		424532			High	Peak Found	High	Not Found	High	Not Found	High	Not Found	High	3.781e-05	1.364e-07	5.06	58.43
[R].IQGLTVEQAEAVVR.[L]			1.12402e-06	9.16411e-05	1	1	3	Q14204	Q14204 [3924-3937]			Cytoplasmic dynein 1 heavy chain 1 OS=Homo sapiens OX=9606 GN=DYNC1H1 PE=1 SV=5	Q14204	0	1512.84	229106		407205		269225					High	Not Found	High	Not Found	High	Not Found	Not Found	Not Found	High	3.781e-05	6.801e-08	3.4	62.83
[R].IQHAVQLATEPLEK.[A]			1.37618e-07	9.16411e-05	1	3	11	P49589-3	P49589-3 [238-251]			Isoform 3 of Cysteine--tRNA ligase, cytoplasmic OS=Homo sapiens OX=9606 GN=CARS1	P49589-3; P49589; P49589-2	0	1576.87		4566840		1.43869e+06		2.05989e+06		2.16885e+06		Not Found	High	Not Found	High	Not Found	High	Not Found	High	High	3.781e-05	5.764e-09	4.11	46.2
[K].LQILDAVSLEER.[F]			7.99745e-05	9.16411e-05	1	1	1	Q86WA8	Q86WA8 [199-210]			Lon protease homolog 2, peroxisomal OS=Homo sapiens OX=9606 GN=LONP2 PE=1 SV=1	Q86WA8	0	1385.76				369561				146343		Not Found	Not Found	Not Found	High	Not Found	Not Found	Not Found	Peak Found	High	3.781e-05	1.002e-05	2.92	72.84
[R].LQQENLAEFFPQNYFR.[L]			3.01027e-08	9.16411e-05	1	1	9	Q9Y4R8	Q9Y4R8 [171-186]			Telomere length regulation protein TEL2 homolog OS=Homo sapiens OX=9606 GN=TELO2 PE=1 SV=2	Q9Y4R8	0	2043.99		4.62388e+06		2.44535e+06		1.15353e+06		943749		Not Found	High	Not Found	High	Not Found	High	Not Found	High	High	3.781e-05	9.802e-10	4.67	82.99
[R].LQLLEPFDKWDGK.[D]			0.000646876	9.16411e-05	1	1	1	Q99798	Q99798 [565-577]			Aconitate hydratase, mitochondrial OS=Homo sapiens OX=9606 GN=ACO2 PE=1 SV=2	Q99798	1	1588.84						705864				Not Found	Not Found	Not Found	Not Found	Not Found	High	Not Found	Not Found	High	3.781e-05	0.0001153	3.44	71.1
[R].LQLLQEDYNR.[T]			0.000518642	9.16411e-05	1	2	4	Q9NZN5	Q9NZN5 [220-229]			Rho guanine nucleotide exchange factor 12 OS=Homo sapiens OX=9606 GN=ARHGEF12 PE=1 SV=1	Q9NZN5; Q9NZN5-2	0	1291.66	285630		572451		264177		254752			High	Not Found	High	Not Found	High	Not Found	High	Not Found	High	3.781e-05	8.896e-05	2.48	56.21
[K].LQILTALCHR.[I]	1xCarbamidomethyl [C8]	1xCarbamidomethyl [C8]	0.000112449	9.16411e-05	1	2	1	Q9UIG0	Q9UIG0 [746-755]			Tyrosine-protein kinase BAZ1B OS=Homo sapiens OX=9606 GN=BAZ1B PE=1 SV=2	Q9UIG0; Q9UIG0-2	0	1224.69			212006							Not Found	Not Found	High	Not Found	Not Found	Not Found	Not Found	Not Found	High	3.781e-05	1.492e-05	2.94	55.87
[R].LQLLTFSAMCQNLAR.[T]	1xCarbamidomethyl [C10]; 1xOxidation [M9]	1xCarbamidomethyl [C10]; 1xOxidation [M9]	1.31488e-05	9.16411e-05	1	1	1	O00443	O00443 [505-519]			Phosphatidylinositol 4-phosphate 3-kinase C2 domain-containing subunit alpha OS=Homo sapiens OX=9606 GN=PIK3C2A PE=1 SV=2	O00443	0	1781.9			307807		82103					Not Found	Not Found	High	Not Found	Peak Found	Not Found	Not Found	Not Found	High	3.781e-05	1.199e-06	2.84	70.28
[R].LQLNGNLQLELAQVLAQERPK.[L]			3.62011e-07	9.16411e-05	1	1	4	P49327	P49327 [1188-1208]			Fatty acid synthase OS=Homo sapiens OX=9606 GN=FASN PE=1 SV=3	P49327	0	2375.34	238517		675499		290105					High	Not Found	High	Not Found	High	Not Found	Not Found	Not Found	High	3.781e-05	1.791e-08	6.4	80.09
[R].LQLNGNLQLELAQVLAQERPK.[L]	1xDeamidated [N/Q]	1xDeamidated [N4; N6; Q13]	2.12228e-06	9.16411e-05	1	1	10	P49327	P49327 [1188-1208]			Fatty acid synthase OS=Homo sapiens OX=9606 GN=FASN PE=1 SV=3	P49327	0	2376.32	967250		2.30633e+06		1.32859e+06		367133			High	Not Found	High	Not Found	High	Not Found	High	Not Found	High	3.781e-05	1.429e-07	5.7	84.98
[R].IQIPNDSRPENPGPLGPISGVGGGGLGSGSDDNALKQELPR.[S]			0.000412005	9.16411e-05	1	6	1	Q562E7	Q562E7 [1568-1608]			WD repeat-containing protein 81 OS=Homo sapiens OX=9606 GN=WDR81 PE=1 SV=2	Q562E7-6; Q562E7-4; Q562E7-3; Q562E7; Q562E7-5; Q562E7-2	1	4066.06									No Quan Values	High	Not Found	Not Found	Not Found	Not Found	Not Found	Not Found	Not Found	High	3.781e-05	6.826e-05	2.64
[R].LQLPVWEYKDR.[F]			0.000148237	9.16411e-05	1	1	4	O43143	O43143 [135-145]			Pre-mRNA-splicing factor ATP-dependent RNA helicase DHX15 OS=Homo sapiens OX=9606 GN=DHX15 PE=1 SV=2	O43143	1	1446.77		842861		817412		376789		273402		Not Found	High	Not Found	High	Not Found	High	Not Found	High	High	3.781e-05	2.056e-05	3.11	60.52
[R].IQLQIQETLQR.[Q]			0.000218248	9.16411e-05	1	2	2	O75694	O75694 [1153-1163]			Nuclear pore complex protein Nup155 OS=Homo sapiens OX=9606 GN=NUP155 PE=1 SV=1	O75694; O75694-2	0	1369.78	176261		453349							High	Not Found	High	Not Found	Not Found	Not Found	Not Found	Not Found	High	3.781e-05	3.242e-05	3.24	59.86
[R].LQLSVTEVGTEK.[L]			0.000222305	9.16411e-05	3	6	6	P55196-2; P55196-1; P55196-3	P55196-2 [405-416]; P55196-1 [405-416]; P55196-3 [405-416]			Isoform 1 of Afadin OS=Homo sapiens OX=9606 GN=AFDN Isoform 2 of Afadin OS=Homo sapiens OX=9606 GN=AFDN Isoform 3 of Afadin OS=Homo sapiens OX=9606 GN=AFDN	P55196-5; P55196-6; P55196-2; P55196-1; P55196-3; P55196	0	1303.71	1.21615e+06		1.50154e+06		2.05167e+06		1.54534e+06		Shared	High	Not Found	High	Not Found	High	Not Found	High	Not Found	High	3.781e-05	3.295e-05	2.74	55.08
[R].LQLLLLNPLK.[E]			0.000336453	9.16411e-05	1	4	3	Q7Z3U7-5	Q7Z3U7-5 [861-870]			Isoform 5 of Protein MON2 homolog OS=Homo sapiens OX=9606 GN=MON2	Q7Z3U7-2; Q7Z3U7-6; Q7Z3U7-5; Q7Z3U7	0	1164.77			1.75403e+06		277627		217992			Not Found	Not Found	High	Not Found	High	Not Found	High	Not Found	High	3.781e-05	5.4e-05	3.24	80.47
[R].LQQENMNLLSDAR.[S]	1xOxidation [M6]	1xOxidation [M6]	8.60901e-05	9.16411e-05	1	5	3	Q3V6T2	Q3V6T2 [291-303]			Girdin OS=Homo sapiens OX=9606 GN=CCDC88A PE=1 SV=2	Q3V6T2; Q3V6T2-2; Q3V6T2-4; Q3V6T2-5; Q3V6T2-3	0	1547.75	152594		297786		225825		103369			High	Not Found	Peak Found	Not Found	High	Not Found	High	Not Found	High	3.781e-05	1.087e-05	2.36	47.77
[R].LQQLGEAHQAETEVLR.[R]			4.81878e-05	9.16411e-05	1	4	1	Q14980	Q14980 [771-786]			Nuclear mitotic apparatus protein 1 OS=Homo sapiens OX=9606 GN=NUMA1 PE=1 SV=2	Q14980-3; Q14980-2; Q14980-4; Q14980	0	1821.95					174389					Not Found	Not Found	Not Found	Not Found	High	Not Found	Not Found	Not Found	High	3.781e-05	5.523e-06	3.69	48.16
[R].IQQLPDHFGPGPVNVVLR.[R]			1.88231e-07	9.16411e-05	1	1	3	Q9UQR0	Q9UQR0 [376-393]			Sex comb on midleg-like protein 2 OS=Homo sapiens OX=9606 GN=SCML2 PE=1 SV=1	Q9UQR0	0	1986.09		1183538				523957				Not Found	High	Not Found	Not Found	Not Found	High	Not Found	High	High	3.781e-05	8.364e-09	5.32	66.27
[R].LQVIVCSATLHSFDVK.[K]	1xCarbamidomethyl [C6]	1xCarbamidomethyl [C6]	1.08336e-06	9.16411e-05	1	3	6	Q92499	Q92499 [401-416]			ATP-dependent RNA helicase DDX1 OS=Homo sapiens OX=9606 GN=DDX1 PE=1 SV=2	Q92499; Q92499-3; Q92499-2	0	1816.96		1.82736e+06		458755		1.28288e+06		811592		Not Found	High	Not Found	High	Not Found	High	Not Found	High	High	3.781e-05	6.452e-08	4.94	63.97
[R].LQVVDQPLPVR.[G]			5.63563e-05	9.16411e-05	1	1	9	P49327	P49327 [374-384]			Fatty acid synthase OS=Homo sapiens OX=9606 GN=FASN PE=1 SV=3	P49327	0	1263.74	2.50103e+06		4.7283e+06	603278	3.65498e+06	293385	723528			High	High	High	High	High	High	High	Not Found	High	3.781e-05	6.645e-06	3.07	58.42
[K].LQVVLNESNADTYAGRPLPSK.[A]			7.99192e-08	9.16411e-05	1	2	4	A6NHR9	A6NHR9 [792-812]			Structural maintenance of chromosomes flexible hinge domain-containing protein 1 OS=Homo sapiens OX=9606 GN=SMCHD1 PE=1 SV=2	A6NHR9-2; A6NHR9	0	2272.19	210156		292145		1.89417e+06		461048			High	Not Found	High	Not Found	High	Not Found	High	Not Found	High	3.781e-05	3.048e-09	6.66	55.9
[K].LQWQSTLGHCVLK.[A]	1xCarbamidomethyl [C10]	1xCarbamidomethyl [C10]	3.45801e-06	9.16411e-05	1	3	3	Q13620-1	Q13620-1 [703-715]			Isoform 2 of Cullin-4B OS=Homo sapiens OX=9606 GN=CUL4B	Q13620-1; Q13620; Q13620-3	0	1569.82		722201				192621		270340		Not Found	High	Not Found	High	Not Found	Peak Found	Not Found	High	High	3.781e-05	2.526e-07	3.19	55.36
[K].LQWQTTLGHAVLK.[A]			9.18236e-05	9.16411e-05	1	2	5	Q13619	Q13619 [567-579]			Cullin-4A OS=Homo sapiens OX=9606 GN=CUL4A PE=1 SV=3	Q13619; Q13619-2	0	1494.84				1.16436e+06		1286989		991786		Not Found	High	Not Found	High	Not Found	High	Not Found	High	High	3.781e-05	1.175e-05	3.47	57.91
[K].LQYAVSGLEPLAWSEDHR.[V]			1.74859e-07	9.16411e-05	1	1	9	Q9UKN8	Q9UKN8 [60-77]			General transcription factor 3C polypeptide 4 OS=Homo sapiens OX=9606 GN=GTF3C4 PE=1 SV=2	Q9UKN8	0	2071.02		8607032		7.59888e+06		2.74099e+06		4.14401e+06		Not Found	High	Not Found	High	Not Found	High	Not Found	High	High	3.781e-05	7.665e-09	5.42	70.09
[K].LQYFMEQFYGIIR.[N]	1xOxidation [M5]	1xOxidation [M5]	8.76907e-05	9.16411e-05	1	2	5	P78527	P78527 [338-350]			DNA-dependent protein kinase catalytic subunit OS=Homo sapiens OX=9606 GN=PRKDC PE=1 SV=3	P78527-2; P78527	0	1723.85	177600		226329	320316	170444		110870	227034		High	Not Found	High	High	High	Not Found	High	Peak Found	High	3.781e-05	1.108e-05	2.83	77.4
[R].LRAPGALLAAAGLADAATEIVER.[V]			3.01101e-07	9.16411e-05	1	2	4	Q9UID3	Q9UID3 [379-401]			Vacuolar protein sorting-associated protein 51 homolog OS=Homo sapiens OX=9606 GN=VPS51 PE=1 SV=2	Q9UID3; Q9UID3-2	1	2249.26		866439		200156		378756		239672		Not Found	High	Not Found	High	Not Found	High	Not Found	High	High	3.781e-05	1.455e-08	5.87	84.43
[K].LRDFPGSGYDLTDTTQADLSR.[N]			1.66947e-08	9.16411e-05	1	2	2	Q5VUJ6	Q5VUJ6 [100-120]			Leucine-rich repeat and calponin homology domain-containing protein 2 OS=Homo sapiens OX=9606 GN=LRCH2 PE=1 SV=2	Q5VUJ6; Q5VUJ6-2	1	2328.11								170738		Not Found	Not Found	Not Found	Not Found	Not Found	Not Found	Not Found	High	High	3.781e-05	4.866e-10	4.77	62.88
[K].LQVGQGVSLTLK.[T]			0.000193622	9.16411e-05	1	1	4	Q14690	Q14690 [970-981]			Protein RRP5 homolog OS=Homo sapiens OX=9606 GN=PDCD11 PE=1 SV=3	Q14690	0	1242.74	1.94167e+06		1837085		881832		1.20824e+06			High	Not Found	High	Not Found	High	Not Found	High	Not Found	High	3.781e-05	2.818e-05	3.1	60.82
[K].IRDGWQVEEADDWLR.[Y]			1.8151e-05	9.16411e-05	1	2	5	P06737	P06737 [171-185]			Glycogen phosphorylase, liver form OS=Homo sapiens OX=9606 GN=PYGL PE=1 SV=4	P06737-2; P06737	1	1887.9		1.91269e+06		1.58591e+06		215859		849250		Not Found	High	Not Found	High	Not Found	High	Not Found	High	High	3.781e-05	1.767e-06	4.54	67.5
[K].LREAEETQSTLQAECDQYR.[S]	1xCarbamidomethyl [C15]	1xCarbamidomethyl [C15]	8.37438e-05	9.16411e-05	2	2	1	Q9P2E9-3; Q9P2E9	Q9P2E9-3 [681-699]; Q9P2E9 [1114-1132]			Isoform 2 of Ribosome-binding protein 1 OS=Homo sapiens OX=9606 GN=RRBP1 Ribosome-binding protein 1 OS=Homo sapiens OX=9606 GN=RRBP1 PE=1 SV=5	Q9P2E9-3; Q9P2E9	1	2327.06	595107		1.21682e+06		869560		333244		Shared	High	Not Found	Peak Found	Not Found	Peak Found	Not Found	Peak Found	Not Found	High	3.781e-05	1.051e-05	4.36	46.7
[R].LREDENAEPVGTTYQK.[T]			0.000355565	9.16411e-05	1	3	8	Q16643	Q16643 [150-165]			Drebrin OS=Homo sapiens OX=9606 GN=DBN1 PE=1 SV=4	Q16643-3; Q16643; Q16643-2	1	1849.89		9.276e+06		9.43804e+06	23655.1	1808063		1.04122e+06		Not Found	High	Not Found	High	Peak Found	High	Not Found	High	High	3.781e-05	5.711e-05	4.57	36.71
[K].IREDLPNLESSEETEQINK.[H]			1.93362e-10	9.16411e-05	1	1	10	Q96QK1	Q96QK1 [750-768]			Vacuolar protein sorting-associated protein 35 OS=Homo sapiens OX=9606 GN=VPS35 PE=1 SV=2	Q96QK1	1	2244.1		4.72472e+07		13033131		1.40885e+07		1.17406e+07		Not Found	High	Not Found	High	Not Found	High	Not Found	High	High	3.781e-05	2.633e-12	5.18	53.53
[K].IREEVTQEFTQYWAQR.[E]			1.58086e-05	9.16411e-05	1	4	3	Q96Q89-3	Q96Q89-3 [601-616]			Isoform 3 of Kinesin-like protein KIF20B OS=Homo sapiens OX=9606 GN=KIF20B	Q96Q89-4; Q96Q89-3; Q96Q89; Q96Q89-2	1	2084.02			178197		311622		151754			Not Found	Not Found	High	Not Found	High	Not Found	High	Not Found	High	3.781e-05	1.495e-06	3.78	64.77
[R].IREPLTAQQLETTTER.[W]			6.35252e-05	9.16411e-05	1	2	2	Q6P1N0	Q6P1N0 [790-805]			Coiled-coil and C2 domain-containing protein 1A OS=Homo sapiens OX=9606 GN=CC2D1A PE=1 SV=1	Q6P1N0-2; Q6P1N0	1	1886	396835		5130121		857094		188348	389129		Peak Found	Not Found	Peak Found	High	Peak Found	Not Found	Peak Found	High	High	3.781e-05	7.621e-06	4.94	47.85
[K].LRETQDPTAQSLAASLSTR.[Q]			4.35446e-05	9.16411e-05	1	3	3	A3KMH1	A3KMH1 [642-660]			von Willebrand factor A domain-containing protein 8 OS=Homo sapiens OX=9606 GN=VWA8 PE=1 SV=2	A3KMH1; A3KMH1-3; A3KMH1-2	1	2045.06	137529		263065				108274			High	Not Found	High	Not Found	Not Found	Not Found	High	Not Found	High	3.781e-05	4.889e-06	5.08	54.98
[R].LRGIEQAVQSHAVAEEEAR.[K]			3.067e-07	9.16411e-05	2	4	4	Q16891-4; Q16891-2	Q16891-4 [545-563]; Q16891-2 [535-553]			Isoform 4 of MICOS complex subunit MIC60 OS=Homo sapiens OX=9606 GN=IMMT Isoform 2 of MICOS complex subunit MIC60 OS=Homo sapiens OX=9606 GN=IMMT	Q16891-4; Q16891-2; Q16891-3; Q16891	1	2093.07		3.02128e+06		740980		1.26732e+06		767572	Shared	Not Found	High	Not Found	Peak Found	Not Found	High	Not Found	High	High	3.781e-05	1.478e-08	5.19	44.78
[R].LRGPSGGGEEPALSQYQR.[L]			4.23482e-06	9.16411e-05	1	1	6	Q99567	Q99567 [83-100]			Nuclear pore complex protein Nup88 OS=Homo sapiens OX=9606 GN=NUP88 PE=1 SV=2	Q99567	1	1901.95		4.40572e+06				2179289		1.05152e+06		Not Found	High	Not Found	High	Not Found	High	Not Found	High	High	3.781e-05	3.191e-07	4.53	42.97
[R].LRHEILLSQSVR.[Q]			0.000202746	9.16411e-05	1	2	3	P54886	P54886 [127-138]			Delta-1-pyrroline-5-carboxylate synthase OS=Homo sapiens OX=9606 GN=ALDH18A1 PE=1 SV=2	P54886; P54886-2	1	1450.85	216802	1651545	211472		66236.9	1.93718e+06		179030		Peak Found	High	Peak Found	Not Found	Peak Found	High	Not Found	High	High	3.781e-05	2.979e-05	4.41	40.13
[K].IRDNLGISTDNLTSPSPPVLIPPLR.[I]			2.45929e-06	9.16411e-05	1	6	1	Q6GYQ0	Q6GYQ0 [1101-1125]			Ral GTPase-activating protein subunit alpha-1 OS=Homo sapiens OX=9606 GN=RALGAPA1 PE=1 SV=1	Q6GYQ0-5; Q6GYQ0-4; Q6GYQ0-7; Q6GYQ0-2; Q6GYQ0; Q6GYQ0-6	1	2685.49					174157					Not Found	Not Found	Not Found	Not Found	High	Not Found	Not Found	Not Found	High	3.781e-05	1.692e-07	4.88	78.24
[K].LQFLFELPSR.[L]			0.000309693	9.16411e-05	1	2	4	Q9UID3	Q9UID3 [177-186]			Vacuolar protein sorting-associated protein 51 homolog OS=Homo sapiens OX=9606 GN=VPS51 PE=1 SV=2	Q9UID3; Q9UID3-2	0	1249.69		1.66628e+06		506333		527330		493862		Not Found	High	Not Found	High	Not Found	High	Not Found	High	High	3.781e-05	4.851e-05	2.83	80.83
[K].IQVEYGVTGSFK.[D]			5.33262e-05	9.16411e-05	1	1	2	O00443	O00443 [1196-1207]			Phosphatidylinositol 4-phosphate 3-kinase C2 domain-containing subunit alpha OS=Homo sapiens OX=9606 GN=PIK3C2A PE=1 SV=2	O00443	0	1327.69			825179		246680		217562			Not Found	Not Found	High	Not Found	High	Not Found	Peak Found	Not Found	High	3.781e-05	6.204e-06	2.92	57.61
[K].LQVELDNVTGLLSQSDSK.[S]			1.01496e-09	9.16411e-05	1	1	5	P35579	P35579 [1278-1295]			Myosin-9 OS=Homo sapiens OX=9606 GN=MYH9 PE=1 SV=4	P35579	0	1946.01	114784	208207	252866		514576		95065.8			High	Peak Found	High	Not Found	High	Not Found	High	Not Found	High	3.781e-05	1.843e-11	4.52	77.96
[K].LQQQLTQAAQELAAEKEK.[I]			2.87686e-05	9.16411e-05	1	1	1	Q15075	Q15075 [996-1013]			Early endosome antigen 1 OS=Homo sapiens OX=9606 GN=EEA1 PE=1 SV=2	Q15075	1	2027.08			232506							Not Found	Not Found	High	Not Found	Not Found	Not Found	Not Found	Not Found	High	3.781e-05	3.017e-06	4.46	55.03
[K].LQQTYAALNSK.[A]			0.000304041	9.16411e-05	1	1	5	P46940	P46940 [1506-1516]			Ras GTPase-activating-like protein IQGAP1 OS=Homo sapiens OX=9606 GN=IQGAP1 PE=1 SV=1	P46940	0	1236.66	325263		1.98706e+06		869813		1074326			High	Not Found	High	Not Found	High	Not Found	High	Not Found	High	3.781e-05	4.764e-05	3.18	41.49
[K].LQQTYAALNSK.[A]	1xDeamidated [N9]	1xDeamidated [N9]	0.000563446	9.16411e-05	1	1	2	P46940	P46940 [1506-1516]			Ras GTPase-activating-like protein IQGAP1 OS=Homo sapiens OX=9606 GN=IQGAP1 PE=1 SV=1	P46940	0	1237.64					52814.4		196676			Not Found	Not Found	High	Not Found	Peak Found	Not Found	High	Not Found	High	3.781e-05	9.792e-05	2.64	43.14
[R].LQQVLQMESHIQSTSDR.[I]			5.1348e-09	9.16411e-05	1	2	7	Q14974	Q14974 [558-574]			Importin subunit beta-1 OS=Homo sapiens OX=9606 GN=KPNB1 PE=1 SV=2	Q14974; Q14974-2	0	1999.99	71947.7	1.43403e+07		6.5261e+06		1061287		3.59265e+06		Peak Found	High	Not Found	High	Not Found	Peak Found	Not Found	High	High	3.781e-05	1.227e-10	5.58	50.91
[R].LQQVLQMESHIQSTSDR.[I]	1xOxidation [M7]	1xOxidation [M7]	9.349e-07	9.16411e-05	1	2	16	Q14974	Q14974 [558-574]			Importin subunit beta-1 OS=Homo sapiens OX=9606 GN=KPNB1 PE=1 SV=2	Q14974; Q14974-2	0	2015.98	128778	2.32394e+07	208825	1.84845e+07	98440.6	4.96281e+06		8.92628e+06		High	High	Peak Found	High	High	High	Not Found	High	High	3.781e-05	5.449e-08	4.06	42.12
[R].IQQWQQSPCIAEEHGK.[K]	1xCarbamidomethyl [C9]	1xCarbamidomethyl [C9]	7.02989e-05	9.16411e-05	1	2	3	Q9P0U4	Q9P0U4 [412-427]			CXXC-type zinc finger protein 1 OS=Homo sapiens OX=9606 GN=CXXC1 PE=1 SV=2	Q9P0U4; Q9P0U4-2	0	1938.91		492331						241801		Not Found	High	Not Found	Not Found	Not Found	High	Not Found	High	High	3.781e-05	8.593e-06	1.62	43.63
[R].LQSAGSAMPTSSSFK.[H]	1xOxidation [M8]	1xOxidation [M8]	0.000595443	9.16411e-05	1	3	1	Q5SW79	Q5SW79 [1268-1282]			Centrosomal protein of 170 kDa OS=Homo sapiens OX=9606 GN=CEP170 PE=1 SV=1	Q5SW79; Q5SW79-3; Q5SW79-2	0	1514.72									No Quan Values	Not Found	Not Found	High	Not Found	Not Found	Not Found	Not Found	Not Found	High	3.781e-05	0.0001044	2.32
[K].IQSAIACTNIFPLGR.[D]	1xCarbamidomethyl [C7]	1xCarbamidomethyl [C7]	1.32607e-08	9.16411e-05	1	2	6	Q9NRL2	Q9NRL2 [793-807]			Bromodomain adjacent to zinc finger domain protein 1A OS=Homo sapiens OX=9606 GN=BAZ1A PE=1 SV=2	Q9NRL2; Q9NRL2-2	0	1660.88	430231		716080		359788		243034			High	Not Found	High	Not Found	High	Not Found	High	Not Found	High	3.781e-05	3.719e-10	3.86	71.97
[K].LQSFEDLASISTYGFR.[G]			1.40212e-06	9.16411e-05	1	1	4	P40692	P40692 [85-100]			DNA mismatch repair protein Mlh1 OS=Homo sapiens OX=9606 GN=MLH1 PE=1 SV=1	P40692	0	1833.9		1.52683e+06	187940	1.54142e+06		1.59344e+06		2.52496e+06		Not Found	High	Peak Found	High	Not Found	High	Not Found	High	High	3.781e-05	8.735e-08	3.21	82.67
[K].LQVEPAVDTSGVQCYGPGIEGQGVFR.[E]	1xCarbamidomethyl [C14]	1xCarbamidomethyl [C14]	3.96941e-07	9.16411e-05	1	2	5	P21333	P21333 [1247-1272]			Filamin-A OS=Homo sapiens OX=9606 GN=FLNA PE=1 SV=4	P21333; P21333-2	0	2763.34	1.08128e+06						359602			High	Not Found	High	Not Found	High	Not Found	High	Not Found	High	3.781e-05	1.997e-08	5.39	73.74
[R].LQSHVNIVFDSEMDK.[L]			1.23247e-06	9.16411e-05	1	1	3	O95602	O95602 [394-408]			DNA-directed RNA polymerase I subunit RPA1 OS=Homo sapiens OX=9606 GN=POLR1A PE=1 SV=2	O95602	0	1761.85	462724		534954		257083		83683.8			High	Not Found	High	Not Found	High	Not Found	Peak Found	Not Found	High	3.781e-05	7.566e-08	3.63	55.59
[R].LQSLPFALTHLNLK.[A]			0.000237109	9.16411e-05	2	3	5	Q14160-3; Q14160	Q14160-3 [370-383]; Q14160 [370-383]			Isoform 3 of Protein scribble homolog OS=Homo sapiens OX=9606 GN=SCRIB Protein scribble homolog OS=Homo sapiens OX=9606 GN=SCRIB PE=1 SV=4	Q14160-2; Q14160-3; Q14160	0	1594.93	1.47861e+06		1.7146e+06		771162		1.14253e+06		Shared	High	Not Found	High	Not Found	High	Not Found	High	Not Found	High	3.781e-05	3.576e-05	4.02	70.88
[K].IQSQFTDAQK.[H]			0.000321313	9.16411e-05	1	3	5	P15924	P15924 [608-617]			Desmoplakin OS=Homo sapiens OX=9606 GN=DSP PE=1 SV=3	P15924; P15924-3; P15924-2	0	1165.58	785349		1387980		670021		220146			High	Not Found	High	High	High	Not Found	High	Not Found	High	3.781e-05	5.092e-05	2.36	36.51
[K].LQSSEAEVR.[S]			0.000190088	9.16411e-05	2	2	7	Q9P2E9-3; Q9P2E9	Q9P2E9-3 [489-497]; Q9P2E9 [922-930]			Isoform 2 of Ribosome-binding protein 1 OS=Homo sapiens OX=9606 GN=RRBP1 Ribosome-binding protein 1 OS=Homo sapiens OX=9606 GN=RRBP1 PE=1 SV=5	Q9P2E9-3; Q9P2E9	0	1018.52	3034611		6.99109e+06		3029646		1.5187e+06		Shared	High	Not Found	High	Not Found	High	Not Found	High	Not Found	High	3.781e-05	2.756e-05	2.11	30.57
[K].LQTLQSENSNLR.[K]			0.000127926	9.16411e-05	1	7	4	Q14161	Q14161 [465-476]			ARF GTPase-activating protein GIT2 OS=Homo sapiens OX=9606 GN=GIT2 PE=1 SV=2	Q14161-10; Q14161-4; Q14161-5; Q14161-8; Q14161-9; Q14161; Q14161-3	0	1402.73		637173				286615				Not Found	High	Not Found	High	Not Found	High	Not Found	High	High	3.781e-05	1.735e-05	2.97	41.88
[K].IQTPELGEVFQNK.[D]			0.000161049	9.16411e-05	1	2	1	Q5JRA6	Q5JRA6 [836-848]			Transport and Golgi organization protein 1 homolog OS=Homo sapiens OX=9606 GN=MIA3 PE=1 SV=1	Q5JRA6-2; Q5JRA6	0	1502.78	190029		510057							Peak Found	Not Found	High	Not Found	Not Found	Not Found	Not Found	Not Found	High	3.781e-05	2.267e-05	2.29	65.19
[K].LQTSDELLTEPK.[Q]			0.000230647	9.16411e-05	1	1	6	Q6NUQ1	Q6NUQ1 [277-288]			RAD50-interacting protein 1 OS=Homo sapiens OX=9606 GN=RINT1 PE=1 SV=1	Q6NUQ1	0	1373.72		7.38931e+06		3.27768e+06		1.63249e+06		1.78352e+06		Not Found	High	Not Found	High	Not Found	High	Not Found	High	High	3.781e-05	3.466e-05	3.56	52.47
[R].LQTSLANLHQK.[S]			0.000362174	9.16411e-05	1	2	5	Q9P2K8	Q9P2K8 [1558-1568]			eIF-2-alpha kinase GCN2 OS=Homo sapiens OX=9606 GN=EIF2AK4 PE=1 SV=3	Q9P2K8-2; Q9P2K8	0	1252.7	495305		4929041		848208		3.6721e+06			High	Not Found	High	Not Found	High	Not Found	High	Not Found	High	3.781e-05	5.843e-05	2.83	37.89
[R].IQTSLTSASLGSADENSVAQADDSLK.[N]			2.18175e-06	9.16411e-05	1	7	4	P49815	P49815 [991-1016]			Tuberin OS=Homo sapiens OX=9606 GN=TSC2 PE=1 SV=2	P49815-5; P49815-7; P49815-4; P49815; P49815-3; P49815-2; P49815-6	0	2608.26			258255							High	Not Found	High	Not Found	High	Not Found	High	Not Found	High	3.781e-05	1.47e-07	4.08	64.08
[R].LQTTDNLLPMSPEEFDEVSR.[I]	1xOxidation [M10]	1xOxidation [M10]	1.19917e-05	9.16411e-05	1	1	3	P42224	P42224 [717-736]			Signal transducer and activator of transcription 1-alpha/beta OS=Homo sapiens OX=9606 GN=STAT1 PE=1 SV=2	P42224	0	2337.09		714027		546422		337409		301283		Not Found	High	Not Found	Peak Found	Not Found	High	Not Found	High	High	3.781e-05	1.083e-06	4.39	72.02
[R].LQSHVNIVFDSEMDK.[L]	1xOxidation [M13]	1xOxidation [M13]	0.000397107	9.16411e-05	1	1	4	O95602	O95602 [394-408]			DNA-directed RNA polymerase I subunit RPA1 OS=Homo sapiens OX=9606 GN=POLR1A PE=1 SV=2	O95602	0	1777.84	1.12612e+06		1.70817e+06		930970		365241			High	Not Found	High	Not Found	High	Not Found	Peak Found	Not Found	High	3.781e-05	6.529e-05	3.76	50.38
[R].IQETQAELPR.[G]			0.000309693	9.16411e-05	1	1	4	Q14566	Q14566 [208-217]			DNA replication licensing factor MCM6 OS=Homo sapiens OX=9606 GN=MCM6 PE=1 SV=1	Q14566	0	1184.63		692771	455240	1155545	116534	260620		506206		Not Found	High	Peak Found	High	Peak Found	High	Not Found	High	High	3.781e-05	4.893e-05	2.45	41.87
[R].LQETLSAADR.[C]			0.000122168	9.16411e-05	1	2	5	P78527	P78527 [15-24]			DNA-dependent protein kinase catalytic subunit OS=Homo sapiens OX=9606 GN=PRKDC PE=1 SV=3	P78527-2; P78527	0	1103.57	1.58755e+06		3.49524e+06	667882	2.05681e+06	273686	634224	229658		High	Not Found	High	Peak Found	Peak Found	Peak Found	High	High	High	3.781e-05	1.644e-05	2.55	39.95
[K].LQESTQTVQSLHGSSR.[A]			3.21235e-06	9.16411e-05	1	1	6	Q9Y5S2	Q9Y5S2 [461-476]			Serine/threonine-protein kinase MRCK beta OS=Homo sapiens OX=9606 GN=CDC42BPB PE=1 SV=2	Q9Y5S2	0	1757.88	659891		2.06689e+06		476237		452729			High	Not Found	High	Not Found	High	Not Found	High	Not Found	High	3.781e-05	2.317e-07	3.04	35.49
[R].LPSAAFFSETQR.[Q]			4.90838e-05	9.16411e-05	1	3	4	Q9P2K8	Q9P2K8 [570-581]			eIF-2-alpha kinase GCN2 OS=Homo sapiens OX=9606 GN=EIF2AK4 PE=1 SV=3	Q9P2K8-2; Q9P2K8-3; Q9P2K8	0	1353.68			3892325		806517		6.91979e+06			Not Found	Not Found	High	Not Found	High	Not Found	High	Not Found	High	3.781e-05	5.628e-06	3.89	61.74
[R].LPSALTATACK.[S]	1xCarbamidomethyl [C10]	1xCarbamidomethyl [C10]	0.000171774	9.16411e-05	1	1	3	Q92615	Q92615 [624-634]			La-related protein 4B OS=Homo sapiens OX=9606 GN=LARP4B PE=1 SV=3	Q92615	0	1132.6		2161714		791133		494895		586503		Not Found	Peak Found	Not Found	High	Not Found	High	Not Found	High	High	3.781e-05	2.448e-05	3.24	46.2
[R].LPSDPFTHLAPK.[C]			2.79845e-05	9.16411e-05	1	2	5	Q9UPY3	Q9UPY3 [641-652]			Endoribonuclease Dicer OS=Homo sapiens OX=9606 GN=DICER1 PE=1 SV=3	Q9UPY3; Q9UPY3-2	0	1322.71	766165		358394		1.48667e+06		575368			High	Not Found	High	Not Found	High	Not Found	High	Not Found	High	3.781e-05	2.93e-06	3.15	56.02
[R].LPSQYNFAMNVLGR.[V]			4.86337e-05	9.16411e-05	1	1	2	Q8TEM1	Q8TEM1 [1233-1246]			Nuclear pore membrane glycoprotein 210 OS=Homo sapiens OX=9606 GN=NUP210 PE=1 SV=3	Q8TEM1	0	1609.82	107456		287312							High	Not Found	High	Not Found	Not Found	Not Found	Not Found	Not Found	High	3.781e-05	5.56e-06	3.57	73.95
[R].IPSWTGAGFVR.[V]			0.000204622	9.16411e-05	1	1	4	P07942	P07942 [580-590]			Laminin subunit beta-1 OS=Homo sapiens OX=9606 GN=LAMB1 PE=1 SV=2	P07942	0	1190.63	678642		956210		692607		242966			High	Not Found	High	Not Found	High	Not Found	High	Not Found	High	3.781e-05	2.989e-05	2.34	64.6
[R].LPSYFVRPDLGPK.[M]			4.04512e-05	9.16411e-05	1	3	7	Q7LBC6	Q7LBC6 [1527-1539]			Lysine-specific demethylase 3B OS=Homo sapiens OX=9606 GN=KDM3B PE=1 SV=2	Q7LBC6-3; Q7LBC6; Q7LBC6-2	0	1488.82	1.14412e+06		1.78995e+06		1.37723e+06		1.04347e+06			High	Not Found	High	Not Found	High	Not Found	High	Not Found	High	3.781e-05	4.496e-06	3.48	59.81
[R].LPTAADLLQIR.[S]			7.77949e-05	9.16411e-05	1	1	4	O75110	O75110 [210-220]			Probable phospholipid-transporting ATPase IIA OS=Homo sapiens OX=9606 GN=ATP9A PE=1 SV=3	O75110	0	1210.72		468337		332278		127196		103373		Not Found	High	Not Found	High	Not Found	High	Not Found	High	High	3.781e-05	9.712e-06	3.09	74.39
[K].LPTHPFEADLLEMAEMIAEDEEK.[K]	2xOxidation [M13; M16]	2xOxidation [M13; M16]	1.9539e-05	9.16411e-05	1	4	4	Q5VZL5	Q5VZL5 [1038-1060]			Zinc finger MYM-type protein 4 OS=Homo sapiens OX=9606 GN=ZMYM4 PE=1 SV=1	Q5VZL5; Q5VZL5-4; Q5VZL5-2; Q5VZL5-3	0	2690.22	220188		394933				196846			High	Not Found	High	Not Found	Not Found	Not Found	High	Not Found	High	3.781e-05	1.914e-06	3.98	84.24
[K].LPTHPFEADLLEMAEMIAEDEEKK.[T]	2xOxidation [M13; M16]	2xOxidation [M13; M16]	0.000100683	9.16411e-05	1	4	3	Q5VZL5	Q5VZL5 [1038-1061]			Zinc finger MYM-type protein 4 OS=Homo sapiens OX=9606 GN=ZMYM4 PE=1 SV=1	Q5VZL5; Q5VZL5-4; Q5VZL5-2; Q5VZL5-3	1	2818.32	356661		339901	196153	69654.2		81044			High	Not Found	High	Peak Found	Peak Found	Not Found	Peak Found	Not Found	High	3.781e-05	1.301e-05	4.36	78.74
[K].LPQVVTDVGVHLQK.[L]			2.37089e-05	9.16411e-05	1	1	2	Q8IWT6	Q8IWT6 [558-571]			Volume-regulated anion channel subunit LRRC8A OS=Homo sapiens OX=9606 GN=LRRC8A PE=1 SV=1	Q8IWT6	0	1532.88		1.07072e+06		663683		336791		357636		Not Found	Peak Found	Not Found	High	Not Found	Peak Found	Not Found	High	High	3.781e-05	2.413e-06	2.04	57.57
[K].LPTPVNQATLSQTQGSEK.[L]			0.000197221	9.16411e-05	1	1	2	Q86T24	Q86T24 [249-266]			Transcriptional regulator Kaiso OS=Homo sapiens OX=9606 GN=ZBTB33 PE=1 SV=2	Q86T24	0	1898.98					89604.6	384306				Not Found	High	Not Found	Not Found	Peak Found	High	Not Found	Not Found	High	3.781e-05	2.887e-05	2.75	49.96
[R].IPTYNISVVGLSGTEK.[E]			7.91864e-08	9.16411e-05	1	1	2	Q9NRY4	Q9NRY4 [11-26]			Rho GTPase-activating protein 35 OS=Homo sapiens OX=9606 GN=ARHGAP35 PE=1 SV=3	Q9NRY4	0	1677.91			464727							Not Found	Not Found	High	Not Found	Not Found	Not Found	Not Found	Not Found	High	3.781e-05	3.02e-09	4.06	68.35
[R].LPVATIFTTHATLLGR.[Y]			1.30219e-07	9.16411e-05	1	2	4	P13807	P13807 [196-211]			Glycogen [starch] synthase, muscle OS=Homo sapiens OX=9606 GN=GYS1 PE=1 SV=2	P13807; P13807-2	0	1710.99		1.348e+06	198532	611834	114277	265960		239739		Not Found	High	Peak Found	High	Peak Found	High	Not Found	High	High	3.781e-05	5.412e-09	4.7	70.44
[K].IPVDTYNNILTVLK.[L]			2.52695e-08	9.16411e-05	1	1	10	Q96QK1	Q96QK1 [404-417]			Vacuolar protein sorting-associated protein 35 OS=Homo sapiens OX=9606 GN=VPS35 PE=1 SV=2	Q96QK1	0	1602.91		3.41453e+07		1.45538e+07		1.18395e+07		1.2778e+07		Not Found	High	Not Found	High	Not Found	High	Not Found	High	High	3.781e-05	7.945e-10	4.88	79.38
[K].IPVDTYNNILTVLK.[L]	1xDeamidated [N]	1xDeamidated [N7; N8]	4.1194e-06	9.16411e-05	1	1	6	Q96QK1	Q96QK1 [404-417]			Vacuolar protein sorting-associated protein 35 OS=Homo sapiens OX=9606 GN=VPS35 PE=1 SV=2	Q96QK1	0	1603.89		5.04649e+06		1.51805e+06		1.69473e+06		1.78346e+06		Not Found	High	Not Found	High	Not Found	High	Not Found	High	High	3.781e-05	3.096e-07	4.44	80.32
[K].LPVHVVVDPILSK.[V]			8.68867e-05	9.16411e-05	1	1	2	Q92698	Q92698 [139-151]			DNA repair and recombination protein RAD54-like OS=Homo sapiens OX=9606 GN=RAD54L PE=1 SV=2	Q92698	0	1415.86		582357				111925		181654		Not Found	High	Not Found	Not Found	Not Found	Peak Found	Not Found	High	High	3.781e-05	1.103e-05	3.89	61.06
[K].LPVLCCTLQLR.[E]	2xCarbamidomethyl [C5; C6]	2xCarbamidomethyl [C5; C6]	0.000330313	9.16411e-05	1	4	2	Q6P996	Q6P996 [486-496]			Pyridoxal-dependent decarboxylase domain-containing protein 1 OS=Homo sapiens OX=9606 GN=PDXDC1 PE=1 SV=2	Q6P996-5; Q6P996-3; Q6P996; Q6P996-4	0	1372.74		828116		878172		368061		405285		Not Found	Peak Found	Not Found	High	Not Found	Peak Found	Not Found	High	High	3.781e-05	5.285e-05	2.02	68.15
[K].LPVPAAAPTPWETHK.[G]			8.68867e-05	9.16411e-05	1	1	4	Q12788	Q12788 [790-804]			Transducin beta-like protein 3 OS=Homo sapiens OX=9606 GN=TBL3 PE=1 SV=2	Q12788	0	1614.86		3.09744e+06		2.89921e+06		1.56627e+06		1.87548e+06		Not Found	High	Not Found	High	Not Found	High	Not Found	Peak Found	High	3.781e-05	1.103e-05	2.74	56.8
[K].IPVPINAELR.[K]			0.000408229	9.16411e-05	1	2	5	O14981	O14981 [1258-1267]			TATA-binding protein-associated factor 172 OS=Homo sapiens OX=9606 GN=BTAF1 PE=1 SV=2	O14981-2; O14981	0	1121.67	2.54984e+06		2.83524e+06		1.46722e+06		640896			High	Not Found	High	Not Found	High	Not Found	High	Not Found	High	3.781e-05	6.734e-05	2.4	60.3
[K].IPVPINAELRK.[Y]			7.02989e-05	9.16411e-05	1	2	4	O14981	O14981 [1258-1268]			TATA-binding protein-associated factor 172 OS=Homo sapiens OX=9606 GN=BTAF1 PE=1 SV=2	O14981-2; O14981	1	1249.76	1.1411e+06		1.00915e+06		526215		389086			High	Not Found	High	Not Found	High	Not Found	High	Not Found	High	3.781e-05	8.592e-06	3.18	49
[R].LPTSALVNLSHGSR.[S]			2.2014e-07	9.16411e-05	1	2	8	Q8IZH2	Q8IZH2 [1164-1177]			5'-3' exoribonuclease 1 OS=Homo sapiens OX=9606 GN=XRN1 PE=1 SV=1	Q8IZH2; Q8IZH2-2	0	1451.8	2.34215e+06		3.28736e+06		1.49533e+06		1.39197e+06			High	Not Found	High	Not Found	High	Not Found	High	Not Found	High	3.781e-05	9.998e-09	4.74	50.53
[R].LPVTLSSAGPVAPR.[D]			4.81771e-06	9.16411e-05	1	1	6	Q9ULE6	Q9ULE6 [463-476]			Paladin OS=Homo sapiens OX=9606 GN=PALD1 PE=1 SV=3	Q9ULE6	0	1364.79		2533179		1.91427e+06		707091		1.57763e+06		Not Found	High	Not Found	High	Not Found	High	Not Found	High	High	3.781e-05	3.74e-07	4.11	58.72
[K].LPQTPLDTGIPFPPVFSTSSAGVK.[S]			1.55163e-06	9.16411e-05	1	3	3	Q7LBC6	Q7LBC6 [1304-1327]			Lysine-specific demethylase 3B OS=Homo sapiens OX=9606 GN=KDM3B PE=1 SV=2	Q7LBC6-3; Q7LBC6; Q7LBC6-2	0	2456.31			748761		335159		372385			Not Found	Not Found	High	Not Found	High	Not Found	High	Not Found	High	3.781e-05	9.88e-08	4.36	88.1
[K].LPQLPITNFSR.[D]			6.47063e-05	9.16411e-05	1	2	4	P21333	P21333 [180-190]			Filamin-A OS=Homo sapiens OX=9606 GN=FLNA PE=1 SV=4	P21333; P21333-2	0	1285.73	2.21704e+06		3346468		2.00231e+06		876005			High	Not Found	High	Not Found	High	Not Found	High	Not Found	High	3.781e-05	7.821e-06	2.79	69.53
[K].LPLFPEPLHVFAPR.[A]			4.23482e-06	9.16411e-05	2	3	8	P26358; P26358-2	P26358 [1324-1337]; P26358-2 [1340-1353]			DNA (cytosine-5)-methyltransferase 1 OS=Homo sapiens OX=9606 GN=DNMT1 PE=1 SV=2 Isoform 2 of DNA (cytosine-5)-methyltransferase 1 OS=Homo sapiens OX=9606 GN=DNMT1	P26358-3; P26358; P26358-2	0	1632.93	1.20813e+06		3.08669e+06		1.08266e+06		1.9318e+06		Shared	High	Not Found	High	Not Found	High	Not Found	High	Not Found	High	3.781e-05	3.207e-07	4.8	76.44
[R].LPLGGWAEDGQSASR.[H]			7.35609e-08	9.16411e-05	1	2	4	Q7Z3C6	Q7Z3C6 [804-818]			Autophagy-related protein 9A OS=Homo sapiens OX=9606 GN=ATG9A PE=1 SV=3	Q7Z3C6-2; Q7Z3C6	0	1543.75	104463	1.68737e+06	76939.6	1464031		548570		712714		Peak Found	High	Peak Found	High	Not Found	High	Not Found	High	High	3.781e-05	2.787e-09	4.22	59.86
[R].LPIGNTIQPSQAATFMNDAIEK.[A]			0.0001538	9.16411e-05	1	2	2	O43395	O43395 [181-202]			U4/U6 small nuclear ribonucleoprotein Prp3 OS=Homo sapiens OX=9606 GN=PRPF3 PE=1 SV=2	O43395-3; O43395	0	2359.2		757720		76763.5		152311				Not Found	High	Not Found	Peak Found	Not Found	High	Not Found	Not Found	High	3.781e-05	2.153e-05	4.4	76.66
[R].LPIGNTIQPSQAATFMNDAIEK.[A]	1xDeamidated [Q11]; 1xOxidation [M16]	1xDeamidated [Q11]; 1xOxidation [M16]	0.000321313	9.16411e-05	1	2	1	O43395	O43395 [181-202]			U4/U6 small nuclear ribonucleoprotein Prp3 OS=Homo sapiens OX=9606 GN=PRPF3 PE=1 SV=2	O43395-3; O43395	0	2376.18									No Quan Values	Not Found	Not Found	Not Found	Not Found	Not Found	High	Not Found	Not Found	High	3.781e-05	5.096e-05	4.2
[R].IPLLLTSLSFK.[V]			7.77949e-05	9.16411e-05	1	1	5	Q14690	Q14690 [1178-1188]			Protein RRP5 homolog OS=Homo sapiens OX=9606 GN=PDCD11 PE=1 SV=3	Q14690	0	1231.77	416921		885561		331607		569296			High	Not Found	High	Not Found	High	Not Found	High	Not Found	High	3.781e-05	9.639e-06	3.25	82.93
[R].LPLLLVANAGTAAVGHTDK.[I]			4.86337e-05	9.16411e-05	1	6	2	Q6P996	Q6P996 [234-252]			Pyridoxal-dependent decarboxylase domain-containing protein 1 OS=Homo sapiens OX=9606 GN=PDXDC1 PE=1 SV=2	Q6P996-5; Q6P996-3; Q6P996; Q6P474; Q6P996-4; Q6P996-2	0	1861.05		408405		277148		116404				Not Found	Peak Found	Not Found	High	Not Found	Peak Found	Not Found	High	High	3.781e-05	5.563e-06	3.7	65.9
[R].LPLMECVQMTQDVQK.[A]	1xCarbamidomethyl [C6]; 2xOxidation [M4; M9]	1xCarbamidomethyl [C6]; 2xOxidation [M4; M9]	1.01571e-06	9.16411e-05	1	2	2	Q01813	Q01813 [355-369]			ATP-dependent 6-phosphofructokinase, platelet type OS=Homo sapiens OX=9606 GN=PFKP PE=1 SV=2	Q01813; Q01813-2	0	1851.86		548097				499663		65965.9		Not Found	Peak Found	Not Found	Not Found	Not Found	High	Not Found	Peak Found	High	3.781e-05	5.984e-08	4.29	51.54
[K].LPISLTNTDLK.[V]			0.000226438	9.16411e-05	1	5	6	Q9Y2X0	Q9Y2X0 [359-369]			Mediator of RNA polymerase II transcription subunit 16 OS=Homo sapiens OX=9606 GN=MED16 PE=1 SV=2	Q9Y2X0-4; Q9Y2X0-3; Q9Y2X0-2; Q9Y2X0; Q9Y2X0-5	0	1214.7		2.87164e+06		2.8808e+06		1.23051e+06		1.4152e+06		Not Found	High	Not Found	High	Not Found	High	Not Found	High	High	3.781e-05	3.382e-05	3.07	62.06
[R].LPISVDSPPAAADSNTTAASNVDK.[V]			3.21235e-06	9.16411e-05	1	5	1	Q3V6T2	Q3V6T2 [1831-1854]			Girdin OS=Homo sapiens OX=9606 GN=CCDC88A PE=1 SV=2	Q3V6T2; Q3V6T2-2; Q3V6T2-4; Q3V6T2-5; Q3V6T2-3	0	2341.15									No Quan Values	Not Found	Not Found	Not Found	Not Found	High	Not Found	Not Found	Not Found	High	3.781e-05	2.312e-07	3.73
[R].IPQNPSPHTHQQQNAPVTVIQSK.[A]			2.57581e-05	9.16411e-05	1	2	5	Q68CP9	Q68CP9 [684-706]			AT-rich interactive domain-containing protein 2 OS=Homo sapiens OX=9606 GN=ARID2 PE=1 SV=2	Q68CP9-3; Q68CP9	0	2549.32	633535				870299		297404			High	Not Found	High	Not Found	High	Not Found	High	Not Found	High	3.781e-05	2.645e-06	3.74	38.52
[K].LPLTPVFEGLAFK.[C]			5.84714e-05	9.16411e-05	1	1	1	Q12769	Q12769 [1237-1249]			Nuclear pore complex protein Nup160 OS=Homo sapiens OX=9606 GN=NUP160 PE=1 SV=3	Q12769	0	1431.82	86477		315302							Peak Found	Not Found	High	Not Found	Not Found	Not Found	Not Found	Not Found	High	3.781e-05	6.953e-06	2.96	84.05
[R].LPNFGSHVLTPAEMEAFK.[Q]	1xOxidation [M14]	1xOxidation [M14]	2.34915e-05	9.16411e-05	1	6	1	Q14C86	Q14C86 [871-888]			GTPase-activating protein and VPS9 domain-containing protein 1 OS=Homo sapiens OX=9606 GN=GAPVD1 PE=1 SV=2	Q14C86; Q14C86-5; Q14C86-3; Q14C86-2; Q14C86-4; Q14C86-6	0	2003.99			1063355							Not Found	Not Found	High	Not Found	Not Found	Not Found	Not Found	Not Found	High	3.781e-05	2.39e-06	4.49	62.29
[R].LPPDFFGVLVR.[D]			0.000259982	9.16411e-05	1	1	3	Q96S15	Q96S15 [628-638]			GATOR complex protein WDR24 OS=Homo sapiens OX=9606 GN=WDR24 PE=1 SV=2	Q96S15	0	1259.71		503475		475695		169822		362452		Not Found	High	Not Found	High	Not Found	Peak Found	Not Found	High	High	3.781e-05	3.96e-05	2.16	83.15
[R].LPPEVANFMQLVELDVSR.[N]			4.64447e-05	9.16411e-05	2	2	3	Q14160-3; Q14160	Q14160-3 [74-91]; Q14160 [74-91]			Isoform 3 of Protein scribble homolog OS=Homo sapiens OX=9606 GN=SCRIB Protein scribble homolog OS=Homo sapiens OX=9606 GN=SCRIB PE=1 SV=4	Q14160-3; Q14160	0	2057.07	1.09346e+06		817720				188476		Shared	High	Not Found	High	Not Found	Not Found	Not Found	High	Not Found	High	3.781e-05	5.296e-06	2.86	88.03
[R].LPPEVANFMQLVELDVSR.[N]	1xOxidation [M9]	1xOxidation [M9]	1.98927e-07	9.16411e-05	2	2	4	Q14160-3; Q14160	Q14160-3 [74-91]; Q14160 [74-91]			Isoform 3 of Protein scribble homolog OS=Homo sapiens OX=9606 GN=SCRIB Protein scribble homolog OS=Homo sapiens OX=9606 GN=SCRIB PE=1 SV=4	Q14160-3; Q14160	0	2073.07							189964		Shared	High	Not Found	High	Not Found	High	Not Found	High	Not Found	High	3.781e-05	8.916e-09	4.06	86.74
[R].LPPGFSASSTVEKPSK.[V]			8.14451e-06	9.16411e-05	1	2	1	O75694	O75694 [392-407]			Nuclear pore complex protein Nup155 OS=Homo sapiens OX=9606 GN=NUP155 PE=1 SV=1	O75694; O75694-2	0	1631.86	135185		318632		90099.2		21492.8			Peak Found	Not Found	High	Not Found	Peak Found	Not Found	Peak Found	Not Found	High	3.781e-05	6.86e-07	2.86	43.85
[R].LPPPADYNKEITEGDEVEVYSR.[A]			8.52421e-08	9.16411e-05	1	1	4	P51116	P51116 [59-80]			Fragile X mental retardation syndrome-related protein 2 OS=Homo sapiens OX=9606 GN=FXR2 PE=1 SV=2	P51116	1	2521.21		1.37765e+06		1.30755e+06		464328		548006		Not Found	High	Not Found	High	Not Found	High	Not Found	High	High	3.781e-05	3.291e-09	4.45	59.71
[R].LPPPADYNKEITEGDEVEVYSR.[A]	1xDeamidated [N8]	1xDeamidated [N8]	1.98976e-06	9.16411e-05	1	1	1	P51116	P51116 [59-80]			Fragile X mental retardation syndrome-related protein 2 OS=Homo sapiens OX=9606 GN=FXR2 PE=1 SV=2	P51116	1	2522.19									No Quan Values	Not Found	Not Found	Not Found	High	Not Found	Not Found	Not Found	Not Found	High	3.781e-05	1.321e-07	5.18
[R].IPQGTVGQVMLDDR.[A]			7.22181e-08	9.16411e-05	1	2	2	Q5SRE5	Q5SRE5 [513-526]			Nucleoporin NUP188 homolog OS=Homo sapiens OX=9606 GN=NUP188 PE=1 SV=1	Q5SRE5; Q5SRE5-2	0	1528.78			1.81173e+06							Not Found	Not Found	High	Not Found	High	Not Found	Not Found	Not Found	High	3.781e-05	2.733e-09	3.94	58.51
[R].IPQGTVGQVMLDDR.[A]	1xOxidation [M10]	1xOxidation [M10]	3.97038e-06	9.16411e-05	1	2	2	Q5SRE5	Q5SRE5 [513-526]			Nucleoporin NUP188 homolog OS=Homo sapiens OX=9606 GN=NUP188 PE=1 SV=1	Q5SRE5; Q5SRE5-2	0	1544.77			2792894		326191					Not Found	Not Found	High	Not Found	High	Not Found	Not Found	Not Found	High	3.781e-05	2.981e-07	3.61	51.95
[R].LPNFGSHVLTPAEMEAFK.[Q]			0.000533167	9.16411e-05	1	6	1	Q14C86	Q14C86 [871-888]			GTPase-activating protein and VPS9 domain-containing protein 1 OS=Homo sapiens OX=9606 GN=GAPVD1 PE=1 SV=2	Q14C86; Q14C86-5; Q14C86-3; Q14C86-2; Q14C86-4; Q14C86-6	0	1987.99			584146							Not Found	Not Found	High	Not Found	Not Found	Not Found	Not Found	Not Found	High	3.781e-05	9.229e-05	4.73	68.82
[K].IRLENEIQTYR.[S]			0.000136445	9.16411e-05	1	1	18	P13645	P13645 [440-450]			Keratin, type I cytoskeletal 10 OS=Homo sapiens OX=9606 GN=KRT10 PE=1 SV=6	P13645	1	1434.77	34346236	22855940	30682028	57386190	57069327	69039698	29911702	13004069		High	High	High	High	High	High	High	High	High	3.781e-05	1.869e-05	4.15	47.48
[R].LPVVIGGLLDVDCSEDVIK.[N]	1xCarbamidomethyl [C13]	1xCarbamidomethyl [C13]	6.76585e-11	9.16411e-05	1	2	3	Q00610	Q00610 [812-830]			Clathrin heavy chain 1 OS=Homo sapiens OX=9606 GN=CLTC PE=1 SV=5	Q00610; Q00610-2	0	2041.09			1.52236e+06							Not Found	Not Found	High	Not Found	High	Not Found	Not Found	Not Found	High	3.781e-05	7.74e-13	6.37	87.24
[K].LPYLVELSPDGSDSR.[D]			1.60947e-07	9.16411e-05	3	3	9	P55196-2; P55196-1; P55196-3	P55196-2 [383-397]; P55196-1 [383-397]; P55196-3 [383-397]			Isoform 1 of Afadin OS=Homo sapiens OX=9606 GN=AFDN Isoform 2 of Afadin OS=Homo sapiens OX=9606 GN=AFDN Isoform 3 of Afadin OS=Homo sapiens OX=9606 GN=AFDN	P55196-2; P55196-1; P55196-3	0	1647.82	860744		1.05067e+06		2.04606e+06		1.308e+06		Shared	High	Not Found	High	Not Found	High	Not Found	High	Not Found	High	3.781e-05	6.977e-09	4.16	72.64
[R].LQDYDVSSISALTQK.[L]			5.48084e-06	9.16411e-05	1	4	2	Q9Y4F3	Q9Y4F3 [1374-1388]			Meiosis regulator and mRNA stability factor 1 OS=Homo sapiens OX=9606 GN=MARF1 PE=1 SV=6	Q9Y4F3-4; Q9Y4F3; Q9Y4F3-5; Q9Y4F3-3	0	1667.85	160152		238398				73077.3			High	Not Found	High	Not Found	Not Found	Not Found	Peak Found	Not Found	High	3.781e-05	4.327e-07	3.2	66.45
[R].LQEAGILSAEELQR.[L]			1.03485e-05	9.16411e-05	1	9	1	Q15149	Q15149 [2795-2808]			Plectin OS=Homo sapiens OX=9606 GN=PLEC PE=1 SV=3	Q15149-4; Q15149; Q15149-6; Q15149-9; Q15149-3; Q15149-8; Q15149-5; Q15149-7; Q15149-2	0	1556.83									No Quan Values	Not Found	Not Found	High	Not Found	Not Found	Not Found	Not Found	Not Found	High	3.781e-05	9.06e-07	3.67
[R].LQEASQTISDLER.[N]			2.95747e-05	9.16411e-05	1	1	3	Q8IYR2	Q8IYR2 [159-171]			SET and MYND domain-containing protein 4 OS=Homo sapiens OX=9606 GN=SMYD4 PE=2 SV=3	Q8IYR2	0	1489.75	679237	878826	1.32357e+06	1.23609e+06	840054	601136	376707	1.19667e+06		Peak Found	High	Peak Found	High	Peak Found	Peak Found	Peak Found	High	High	3.781e-05	3.12e-06	3.5	53.38
[R].LQEDGLSVWFQR.[R]			4.23578e-05	9.16411e-05	1	1	4	Q8N3E9	Q8N3E9 [87-98]			1-phosphatidylinositol 4,5-bisphosphate phosphodiesterase delta-3 OS=Homo sapiens OX=9606 GN=PLCD3 PE=1 SV=3	Q8N3E9	0	1477.74									No Quan Values	Not Found	High	Not Found	High	Not Found	High	Not Found	High	High	3.781e-05	4.735e-06	2.9
[K].IQEEILVHIR.[Q]			0.000664989	9.16411e-05	1	1	1	Q6P2E9	Q6P2E9 [213-222]			Enhancer of mRNA-decapping protein 4 OS=Homo sapiens OX=9606 GN=EDC4 PE=1 SV=1	Q6P2E9	0	1249.73						102718		192697		Not Found	Not Found	Not Found	Not Found	Not Found	Peak Found	Not Found	High	High	3.781e-05	0.0001193	2.55	52.38
[R].LQEELNTTDLYSYR.[K]			1.18789e-06	9.16411e-05	1	4	5	Q6YHU6	Q6YHU6 [122-135]			Thyroid adenoma-associated protein OS=Homo sapiens OX=9606 GN=THADA PE=1 SV=1	Q6YHU6-5; Q6YHU6-3; Q6YHU6; Q6YHU6-6	0	1744.84	1.85437e+06		1.18997e+06		336402		367905			High	Not Found	High	Not Found	High	Not Found	High	Not Found	High	3.781e-05	7.227e-08	4.28	63.35
[R].LQEESQTATAQLR.[K]			1.23247e-06	9.16411e-05	1	2	3	Q9P2F8	Q9P2F8 [1696-1708]			Signal-induced proliferation-associated 1-like protein 2 OS=Homo sapiens OX=9606 GN=SIPA1L2 PE=1 SV=2	Q9P2F8-2; Q9P2F8	0	1474.75	212729									High	Not Found	High	Not Found	Not Found	Not Found	High	Not Found	High	3.781e-05	7.548e-08	3.7	40.2
[R].IQELENLPGSLAGDLR.[T]			3.30154e-07	9.16411e-05	2	5	8	P51532; P51532-4	P51532 [382-397]; P51532-4 [382-397]			Transcription activator BRG1 OS=Homo sapiens OX=9606 GN=SMARCA4 PE=1 SV=2 Isoform 4 of Transcription activator BRG1 OS=Homo sapiens OX=9606 GN=SMARCA4	P51532; P51532-5; P51532-2; P51532-4; P51532-3	0	1724.92	5.05307e+06		9.24002e+06		3.08055e+06		2.90973e+06		Shared	High	Not Found	High	Not Found	High	Not Found	High	Not Found	High	3.781e-05	1.618e-08	4.63	73.13
[R].LQELESCSGLGSTSDDTDVR.[E]	1xCarbamidomethyl [C7]	1xCarbamidomethyl [C7]	4.55643e-08	9.16411e-05	1	6	2	Q14C86	Q14C86 [735-754]			GTPase-activating protein and VPS9 domain-containing protein 1 OS=Homo sapiens OX=9606 GN=GAPVD1 PE=1 SV=2	Q14C86; Q14C86-5; Q14C86-3; Q14C86-2; Q14C86-4; Q14C86-6	0	2168.96			443494	176968						Not Found	Not Found	High	Peak Found	Not Found	Not Found	Not Found	Not Found	High	3.781e-05	1.581e-09	4.18	55.69
[R].LQDVSGQLSSSK.[K]			0.000301254	9.16411e-05	1	1	1	Q15059	Q15059 [672-683]			Bromodomain-containing protein 3 OS=Homo sapiens OX=9606 GN=BRD3 PE=1 SV=1	Q15059	0	1248.64								168795		Not Found	Not Found	Not Found	Not Found	Not Found	Not Found	Not Found	High	High	3.781e-05	4.736e-05	2.44	40.43
[K].IQELFHVEPGLQR.[L]			8.14451e-06	9.16411e-05	1	2	5	Q96T88	Q96T88 [32-44]			E3 ubiquitin-protein ligase UHRF1 OS=Homo sapiens OX=9606 GN=UHRF1 PE=1 SV=1	Q96T88-2; Q96T88	0	1565.84		1.49613e+06		1.74694e+06		649682		1.25398e+06		Not Found	High	Not Found	High	Not Found	High	Not Found	High	High	3.781e-05	6.904e-07	3.64	57.85
[K].LQELPDAVPHGEMPR.[H]	1xOxidation [M13]	1xOxidation [M13]	8.68867e-05	9.16411e-05	1	1	9	P33992	P33992 [229-243]			DNA replication licensing factor MCM5 OS=Homo sapiens OX=9606 GN=MCM5 PE=1 SV=5	P33992	0	1704.84		9.63659e+06		1.65212e+06	97369.8	6.75078e+06		4.93458e+06		Not Found	High	Not Found	High	Peak Found	High	Not Found	High	High	3.781e-05	1.1e-05	3.49	47.53
[K].IQELQASQEAR.[A]			2.59965e-05	9.16411e-05	1	2	5	Q9Y6D9	Q9Y6D9 [208-218]			Mitotic spindle assembly checkpoint protein MAD1 OS=Homo sapiens OX=9606 GN=MAD1L1 PE=1 SV=2	Q9Y6D9; Q9Y6D9-3	0	1272.65		1812868	942455	911247	380950	951220		438710		Not Found	High	Peak Found	High	Peak Found	High	Not Found	High	High	3.781e-05	2.679e-06	2.78	37.26
[R].IQEQVQQTLAR.[K]			0.00011667	9.16411e-05	1	2	5	Q99959-2	Q99959-2 [56-66]			Isoform 1 of Plakophilin-2 OS=Homo sapiens OX=9606 GN=PKP2	Q99959; Q99959-2	0	1313.72		2.01943e+06		1.19861e+06		636247		1.61625e+06		Not Found	High	Not Found	High	Not Found	High	Not Found	High	High	3.781e-05	1.558e-05	3.23	42.23
[K].LQEQVTDLR.[S]			0.000573916	9.16411e-05	1	2	2	P12270	P12270 [700-708]			Nucleoprotein TPR OS=Homo sapiens OX=9606 GN=TPR PE=1 SV=3	P12270-2; P12270	0	1101.59	185653		801902		268042		189960			High	Not Found	Peak Found	Not Found	Peak Found	Not Found	High	Not Found	High	3.781e-05	0.0001007	2.25	44.36
[K].LQERPWLVDSYSEWLQR.[L]			2.64736e-06	9.16411e-05	1	1	5	Q9NVE7	Q9NVE7 [593-609]			4'-phosphopantetheine phosphatase OS=Homo sapiens OX=9606 GN=PANK4 PE=1 SV=1	Q9NVE7	0	2205.11		1.40102e+06		781657		556832		654570		Not Found	High	Not Found	High	Not Found	High	Not Found	High	High	3.781e-05	1.851e-07	4.85	75.32
[K].LQESGQVTISELCK.[T]	1xCarbamidomethyl [C13]	1xCarbamidomethyl [C13]	3.18211e-07	9.16411e-05	1	3	4	O94874	O94874 [131-144]			E3 UFM1-protein ligase 1 OS=Homo sapiens OX=9606 GN=UFL1 PE=1 SV=2	O94874; O94874-3; O94874-2	0	1591.8		1.11439e+06			172596	498595		747570		Not Found	High	Not Found	High	Peak Found	High	Not Found	High	High	3.781e-05	1.546e-08	4.12	54.7
[R].IQESSQVLYK.[L]			0.000451742	9.16411e-05	1	5	6	Q6YHU6	Q6YHU6 [693-702]			Thyroid adenoma-associated protein OS=Homo sapiens OX=9606 GN=THADA PE=1 SV=1	Q6YHU6-2; Q6YHU6-5; Q6YHU6-3; Q6YHU6; Q6YHU6-6	0	1194.64	1.45107e+06		1.79249e+06		694173		304281			High	Not Found	High	Not Found	High	Not Found	High	Not Found	High	3.781e-05	7.548e-05	2.49	41.79
[K].LQESTQTVQALQYSTVDGPLTASK.[D]			4.68525e-07	9.16411e-05	2	6	4	Q5VT25-3; Q5VT25-6	Q5VT25-3 [462-485]; Q5VT25-6 [462-485]			Isoform 3 of Serine/threonine-protein kinase MRCK alpha OS=Homo sapiens OX=9606 GN=CDC42BPA Isoform 6 of Serine/threonine-protein kinase MRCK alpha OS=Homo sapiens OX=9606 GN=CDC42BPA	Q5VT25-5; Q5VT25; Q5VT25-4; Q5VT25-3; Q5VT25-6; Q5VT25-2	0	2565.3	416522		521748		372764				Shared	High	Not Found	High	Not Found	High	Not Found	High	Not Found	High	3.781e-05	2.423e-08	4.44	67.7
[K].LQESTQTVQALQYSTVDGPLTASK.[D]	1xDeamidated [Q12]	1xDeamidated [Q12]	4.19694e-05	9.16411e-05	2	6	2	Q5VT25-3; Q5VT25-6	Q5VT25-3 [462-485]; Q5VT25-6 [462-485]			Isoform 3 of Serine/threonine-protein kinase MRCK alpha OS=Homo sapiens OX=9606 GN=CDC42BPA Isoform 6 of Serine/threonine-protein kinase MRCK alpha OS=Homo sapiens OX=9606 GN=CDC42BPA	Q5VT25-5; Q5VT25; Q5VT25-4; Q5VT25-3; Q5VT25-6; Q5VT25-2	0	2566.29							169185		Shared	Not Found	Not Found	Not Found	Not Found	High	Not Found	High	Not Found	High	3.781e-05	4.672e-06	3.37	67.75
[K].LQELPDAVPHGEMPR.[H]			2.90348e-05	9.16411e-05	1	1	5	P33992	P33992 [229-243]			DNA replication licensing factor MCM5 OS=Homo sapiens OX=9606 GN=MCM5 PE=1 SV=5	P33992	0	1688.84		2.33695e+06		392805		317927		2.18981e+06		Not Found	High	Not Found	High	Not Found	High	Not Found	High	High	3.781e-05	3.063e-06	3.8	53.26
[K].LPYDVTPEQALAHEEVK.[T]			6.06082e-09	9.16411e-05	1	1	4	P46940	P46940 [1112-1128]			Ras GTPase-activating-like protein IQGAP1 OS=Homo sapiens OX=9606 GN=IQGAP1 PE=1 SV=1	P46940	0	1938.98	529113	367894	2.56876e+06	511239	1.2633e+06	326632	1.52438e+06	387601		High	Peak Found	High	Peak Found	High	Peak Found	High	Peak Found	High	3.781e-05	1.487e-10	6.36	59.45
[K].LQDSQNNLQINVSELQTLQSEHDTLLER.[H]			1.68615e-05	9.16411e-05	1	1	1	Q8IWJ2	Q8IWJ2 [1365-1392]			GRIP and coiled-coil domain-containing protein 2 OS=Homo sapiens OX=9606 GN=GCC2 PE=1 SV=4	Q8IWJ2	0	3265.63									No Quan Values	Not Found	Not Found	High	Not Found	Not Found	Not Found	Not Found	Not Found	High	3.781e-05	1.61e-06	3.78
[K].IQDNNENYQVGLAELR.[T]			4.55643e-08	9.16411e-05	1	2	5	Q8TDY2	Q8TDY2 [1111-1126]			RB1-inducible coiled-coil protein 1 OS=Homo sapiens OX=9606 GN=RB1CC1 PE=1 SV=3	Q8TDY2-2; Q8TDY2	0	1875.92									No Quan Values	High	Not Found	High	Not Found	High	Not Found	High	Not Found	High	3.781e-05	1.579e-09	4.06
[K].IPYSDVNIGTGVAHPPR.[W]			3.72245e-06	9.16411e-05	1	1	1	Q9UKM7	Q9UKM7 [372-388]			Endoplasmic reticulum mannosyl-oligosaccharide 1,2-alpha-mannosidase OS=Homo sapiens OX=9606 GN=MAN1B1 PE=1 SV=2	Q9UKM7	0	1792.93			217902		223611	682651	24202.4	419748		Not Found	Not Found	Peak Found	Not Found	Peak Found	Peak Found	Peak Found	High	High	3.781e-05	2.764e-07	3.62	52.77
[K].IPYSDVNIGTGVAHPPR.[W]	1xDeamidated [N7]	1xDeamidated [N7]	4.81653e-07	9.16411e-05	1	1	1	Q9UKM7	Q9UKM7 [372-388]			Endoplasmic reticulum mannosyl-oligosaccharide 1,2-alpha-mannosidase OS=Homo sapiens OX=9606 GN=MAN1B1 PE=1 SV=2	Q9UKM7	0	1793.92									No Quan Values	Not Found	Not Found	Not Found	Not Found	Not Found	High	Not Found	Not Found	High	3.781e-05	2.501e-08	4.87
[R].IPYTELSHIIK.[K]			0.000481815	9.16411e-05	1	2	2	Q92830	Q92830 [659-669]			Histone acetyltransferase KAT2A OS=Homo sapiens OX=9606 GN=KAT2A PE=1 SV=3	Q92830-2; Q92830	0	1313.75				470673						Not Found	Not Found	Not Found	High	Not Found	Not Found	Not Found	High	High	3.781e-05	8.189e-05	1.9	57.98
[R].LQAALDDEEAGGRPAMEPGNGSLDLGGDSAGR.[S]	1xDeamidated [N20]; 1xOxidation [M16]	1xDeamidated [N20]; 1xOxidation [M16]	0.000130304	9.16411e-05	1	2	5	Q00839	Q00839 [38-69]			Heterogeneous nuclear ribonucleoprotein U OS=Homo sapiens OX=9606 GN=HNRNPU PE=1 SV=6	Q00839-2; Q00839	0	3143.42			361007	824213	119740	900399				Not Found	Not Found	High	High	Peak Found	High	Not Found	High	High	3.781e-05	1.761e-05	4.5	59.71
[K].LQAEADDLQIR.[E]			0.00011349	9.16411e-05	1	2	4	Q08378	Q08378 [1233-1243]			Golgin subfamily A member 3 OS=Homo sapiens OX=9606 GN=GOLGA3 PE=1 SV=2	Q08378-2; Q08378	0	1271.66	64309.2	3.41758e+06	811344	1.19232e+06	238010	965604	68486.6	726606		Peak Found	Peak Found	High	Peak Found	High	Peak Found	High	Peak Found	High	3.781e-05	1.507e-05	2.44	51.13
[R].LQAEDCSIACLPR.[N]	2xCarbamidomethyl [C6; C10]	2xCarbamidomethyl [C6; C10]	2.69659e-06	9.16411e-05	1	4	1	Q15262-4	Q15262-4 [1210-1222]			Isoform 4 of Receptor-type tyrosine-protein phosphatase kappa OS=Homo sapiens OX=9606 GN=PTPRK	Q15262; Q15262-4; Q15262-2; Q15262-3	0	1532.72									No Quan Values	Not Found	Not Found	Not Found	Not Found	Not Found	Not Found	Not Found	High	High	3.781e-05	1.877e-07	3.42
[R].LQAEPRPEEPPNYPAAPASDPLR.[E]			5.47949e-07	9.16411e-05	1	5	3	P41229	P41229 [1315-1337]			Lysine-specific demethylase 5C OS=Homo sapiens OX=9606 GN=KDM5C PE=1 SV=2	P41229-5; P41229-3; P41229; P41229-2; P41229-4	0	2515.26			2.16681e+06		508636		332895			Not Found	Not Found	High	Not Found	High	Not Found	High	Not Found	High	3.781e-05	2.924e-08	6.3	54.79
[R].LQAEPRPEEPPNYPAAPASDPLR.[E]	1xDeamidated [N12]	1xDeamidated [N12]	1.42853e-05	9.16411e-05	1	5	2	P41229	P41229 [1315-1337]			Lysine-specific demethylase 5C OS=Homo sapiens OX=9606 GN=KDM5C PE=1 SV=2	P41229-5; P41229-3; P41229; P41229-2; P41229-4	0	2516.24									No Quan Values	Not Found	Not Found	High	Not Found	High	Not Found	Not Found	Not Found	High	3.781e-05	1.335e-06	5.6
[R].LQAEWHDSDWILSVPAK.[L]			8.68484e-07	9.16411e-05	1	1	3	Q9BQ39	Q9BQ39 [644-660]			ATP-dependent RNA helicase DDX50 OS=Homo sapiens OX=9606 GN=DDX50 PE=1 SV=1	Q9BQ39	0	1995		1.05282e+06		263187		832241		390660		Not Found	High	Not Found	Peak Found	Not Found	High	Not Found	High	High	3.781e-05	5.011e-08	5.2	70.83
[R].LQDSFASETNLDFR.[S]			8.14252e-07	9.16411e-05	1	1	15	Q92621	Q92621 [1936-1949]			Nuclear pore complex protein Nup205 OS=Homo sapiens OX=9606 GN=NUP205 PE=1 SV=3	Q92621	0	1642.77	9.37065e+06		5.17569e+06		3658228		2.60269e+06			High	Not Found	High	Not Found	High	Not Found	High	Not Found	High	3.781e-05	4.625e-08	4.32	65.78
[R].LQAFFHIQAQK.[L]			0.000295757	9.16411e-05	1	2	4	Q9NRL2	Q9NRL2 [1522-1532]			Bromodomain adjacent to zinc finger domain protein 1A OS=Homo sapiens OX=9606 GN=BAZ1A PE=1 SV=2	Q9NRL2; Q9NRL2-2	0	1330.73	279664		341097	271011	179642	148669	84178.1			High	Not Found	High	Peak Found	High	Peak Found	High	Not Found	High	3.781e-05	4.622e-05	3.08	52.17
[K].LQALQADYQALQQR.[E]			6.8383e-05	9.16411e-05	1	2	1	Q9BQS8	Q9BQS8 [639-652]			FYVE and coiled-coil domain-containing protein 1 OS=Homo sapiens OX=9606 GN=FYCO1 PE=1 SV=3	Q9BQS8; Q9BQS8-4	0	1645.87			202888							Not Found	Not Found	High	Not Found	Not Found	Not Found	Not Found	Not Found	High	3.781e-05	8.35e-06	2.6	59.51
[R].IQAQFGPLAQLSPQER.[L]			9.0964e-06	9.16411e-05	1	1	5	P51692	P51692 [182-197]			Signal transducer and activator of transcription 5B OS=Homo sapiens OX=9606 GN=STAT5B PE=1 SV=2	P51692	0	1782.95				632290		83432.3		224444		Not Found	High	Not Found	High	Not Found	High	Not Found	High	High	3.781e-05	7.836e-07	4.13	68.57
[R].IQAQLALKPGLIGNANMVGLANLHAMGIAPPK.[V]	2xOxidation [M17; M26]	2xOxidation [M17; M26]	9.97168e-07	9.16411e-05	1	2	1	O43395	O43395 [213-244]			U4/U6 small nuclear ribonucleoprotein Prp3 OS=Homo sapiens OX=9606 GN=PRPF3 PE=1 SV=2	O43395-3; O43395	0	3253.79		504060				393142				Not Found	Peak Found	Not Found	Not Found	Not Found	High	Not Found	Not Found	High	3.781e-05	5.858e-08	6.06	67.72
[R].LQAQNIQQR.[H]			0.000612117	9.16411e-05	1	4	5	Q9UK61	Q9UK61 [1425-1433]			Protein TASOR OS=Homo sapiens OX=9606 GN=TASOR PE=1 SV=3	Q9UK61; Q9UK61-4; Q9UK61-3; Q9UK61-2	0	1098.6	440449		3.18507e+06		304501		358455			High	Not Found	High	Not Found	High	Not Found	High	Not Found	High	3.781e-05	0.0001085	2.54	32.21
[K].LQCVFLDPASAGIGYGR.[N]	1xCarbamidomethyl [C3]	1xCarbamidomethyl [C3]	3.21156e-07	9.16411e-05	1	1	1	Q9NRY4	Q9NRY4 [728-744]			Rho GTPase-activating protein 35 OS=Homo sapiens OX=9606 GN=ARHGAP35 PE=1 SV=3	Q9NRY4	0	1823.91			224529							Not Found	Not Found	High	Not Found	Not Found	Not Found	Not Found	Not Found	High	3.781e-05	1.553e-08	3.26	74.6
[R].LQDGSAYTIDWSR.[E]			7.36122e-05	9.16411e-05	1	2	5	Q96PV6	Q96PV6 [325-337]			Leukocyte receptor cluster member 8 OS=Homo sapiens OX=9606 GN=LENG8 PE=1 SV=3	Q96PV6; Q96PV6-1	0	1511.71	47031.5	1.00243e+06		1.02014e+06		253854		628219		Peak Found	High	Not Found	High	Not Found	Peak Found	Not Found	High	High	3.781e-05	9.031e-06	3.38	62.81
[K].IQDKEGIPPDQQR.[L]			1.23277e-05	9.16411e-05	1	4	25	P62987	P62987 [30-42]			Ubiquitin-60S ribosomal protein L40 OS=Homo sapiens OX=9606 GN=UBA52 PE=1 SV=2	P62987; P62979; P0CG47; P0CG48	1	1523.78	1.04357e+07	4.71075e+06	20949530	1.98452e+07	3.0858e+06	1.06645e+06	1.12546e+06	957783		High	High	High	High	High	High	High	Peak Found	High	3.781e-05	1.121e-06	3.71	32.54
[K].LQDLEEALQQSK.[E]			6.90157e-05	9.16411e-05	1	1	4	Q7Z794	Q7Z794 [428-439]			Keratin, type II cytoskeletal 1b OS=Homo sapiens OX=9606 GN=KRT77 PE=1 SV=3	Q7Z794	0	1401.72					370544	843592				Not Found	Not Found	High	Not Found	High	High	High	Not Found	High	3.781e-05	8.421e-06	3.14	58.61
[R].LQDLLLGPK.[A]			0.000568657	9.16411e-05	1	1	4	Q8N201	Q8N201 [954-962]			Integrator complex subunit 1 OS=Homo sapiens OX=9606 GN=INTS1 PE=1 SV=2	Q8N201	0	996.609	150570		187472		878176					High	Not Found	High	Not Found	High	Not Found	High	Not Found	High	3.781e-05	9.881e-05	1.8	59.96
[K].IQAGEGETAVLNQLQEK.[N]			6.11841e-08	9.16411e-05	1	1	2	Q15075	Q15075 [553-569]			Early endosome antigen 1 OS=Homo sapiens OX=9606 GN=EEA1 PE=1 SV=2	Q15075	0	1827.94			297473							Not Found	Not Found	High	Not Found	Not Found	Not Found	Not Found	Not Found	High	3.781e-05	2.231e-09	3.48	60.75
[K].IRLENEIQTYR.[S]	1xDeamidated [N5]	1xDeamidated [N5]	7.49808e-05	9.16411e-05	1	1	14	P13645	P13645 [440-450]			Keratin, type I cytoskeletal 10 OS=Homo sapiens OX=9606 GN=KRT10 PE=1 SV=6	P13645	1	1435.75	2.46645e+07	2.81196e+07	4.8851e+07	3.1538e+07	5.47508e+07	37696358	3.83313e+07	4.22424e+07		High	Peak Found	High	Peak Found	High	High	High	Peak Found	High	3.781e-05	9.299e-06	3.42	48.18
[K].IRPGEFEQFESTIGFK.[L]			5.95585e-05	9.16411e-05	1	4	3	Q9Y2J2-2	Q9Y2J2-2 [351-366]			Isoform 2 of Band 4.1-like protein 3 OS=Homo sapiens OX=9606 GN=EPB41L3	Q9Y2J2-3; Q9Y2J2-4; Q9Y2J2-2; Q9Y2J2	0	1884.95		489717		479234		139772		219388		Not Found	High	Not Found	High	Not Found	Peak Found	Not Found	High	High	3.781e-05	7.1e-06	2.65	68.56
[K].IRPGFEEQILYLQK.[Q]			0.000664989	9.16411e-05	1	1	1	Q8IWJ2	Q8IWJ2 [190-203]			GRIP and coiled-coil domain-containing protein 2 OS=Homo sapiens OX=9606 GN=GCC2 PE=1 SV=4	Q8IWJ2	0	1733.96	202123		365179							Peak Found	Not Found	High	Not Found	Not Found	Not Found	Not Found	Not Found	High	3.781e-05	0.0001191	4.11	62.44
[K].LSSNAVSQITR.[M]			0.000304041	9.16411e-05	1	1	4	Q9BQ39	Q9BQ39 [612-622]			ATP-dependent RNA helicase DDX50 OS=Homo sapiens OX=9606 GN=DDX50 PE=1 SV=1	Q9BQ39	0	1175.64		2.93248e+06		424053		1.20113e+06		617694		Not Found	High	Not Found	High	Not Found	High	Not Found	High	High	3.781e-05	4.75e-05	3.49	43.03
[K].ISSNPNPVVQMSVGHK.[A]			0.000408229	9.16411e-05	1	4	1	A0FGR8	A0FGR8 [554-569]			Extended synaptotagmin-2 OS=Homo sapiens OX=9606 GN=ESYT2 PE=1 SV=1	A0FGR8-4; A0FGR8-6; A0FGR8; A0FGR8-2	0	1693.87								474032		Not Found	Not Found	Not Found	Not Found	Not Found	Not Found	Not Found	High	High	3.781e-05	6.741e-05	3.56	45.75
[K].ISSNPNPVVQMSVGHK.[A]	1xOxidation [M11]	1xOxidation [M11]	5.23285e-07	9.16411e-05	1	4	2	A0FGR8	A0FGR8 [554-569]			Extended synaptotagmin-2 OS=Homo sapiens OX=9606 GN=ESYT2 PE=1 SV=1	A0FGR8-4; A0FGR8-6; A0FGR8; A0FGR8-2	0	1709.86		1.20317e+06		1.06054e+06		176460		257793		Not Found	High	Not Found	High	Not Found	Peak Found	Not Found	Peak Found	High	3.781e-05	2.768e-08	3.99	37.2
[R].LSSPCIMVVNHDASSIPR.[L]	1xCarbamidomethyl [C5]	1xCarbamidomethyl [C5]	1.11371e-06	9.16411e-05	1	2	4	Q08J23	Q08J23 [231-248]			RNA cytosine C(5)-methyltransferase NSUN2 OS=Homo sapiens OX=9606 GN=NSUN2 PE=1 SV=2	Q08J23; Q08J23-2	0	1982.98		1.54097e+06		1111826		338302		693576		Not Found	High	Not Found	High	Not Found	High	Not Found	High	High	3.781e-05	6.686e-08	4.95	56.64
[R].LSSPCIMVVNHDASSIPR.[L]	1xCarbamidomethyl [C5]; 1xOxidation [M7]	1xCarbamidomethyl [C5]; 1xOxidation [M7]	2.43674e-06	9.16411e-05	1	2	5	Q08J23	Q08J23 [231-248]			RNA cytosine C(5)-methyltransferase NSUN2 OS=Homo sapiens OX=9606 GN=NSUN2 PE=1 SV=2	Q08J23; Q08J23-2	0	1998.97		2.3803e+06		1.95584e+06		1.40962e+06		1.17499e+06		Not Found	High	Not Found	High	Not Found	High	Not Found	High	High	3.781e-05	1.68e-07	4.78	52.38
[R].LSSPLIVEIVR.[R]			0.000195413	9.16411e-05	1	1	4	Q8N653	Q8N653 [620-630]			Leucine-zipper-like transcriptional regulator 1 OS=Homo sapiens OX=9606 GN=LZTR1 PE=1 SV=2	Q8N653	0	1225.75		1.1431e+06		849809		312364		452526		Not Found	High	Not Found	High	Not Found	High	Not Found	High	High	3.781e-05	2.835e-05	2.74	72.02
[K].LSSSDAPAQDTGSSAAAVETDASR.[T]			1.89926e-08	9.16411e-05	1	6	7	Q7Z4S6	Q7Z4S6 [852-875]			Kinesin-like protein KIF21A OS=Homo sapiens OX=9606 GN=KIF21A PE=1 SV=2	Q7Z4S6; Q7Z4S6-5; Q7Z4S6-3; Q7Z4S6-2; Q7Z4S6-6; Q7Z4S6-4	0	2294.04	354604									High	Not Found	High	Not Found	High	Not Found	High	Not Found	High	3.781e-05	5.668e-10	4.65	47.26
[R].LSSSLAAMLIGILHMR.[S]	2xOxidation [M8; M15]	2xOxidation [M8; M15]	1.4682e-06	9.16411e-05	1	2	3	Q9NXF1	Q9NXF1 [645-660]			Testis-expressed protein 10 OS=Homo sapiens OX=9606 GN=TEX10 PE=1 SV=2	Q9NXF1-2; Q9NXF1	0	1744.94		692520		544290		147329		150713		Not Found	High	Not Found	High	Not Found	High	Not Found	Peak Found	High	3.781e-05	9.29e-08	4.65	79.11
[R].LSSSPGLFGAFSVR.[G]			3.82675e-06	9.16411e-05	1	4	1	Q5VT52	Q5VT52 [906-919]			Regulation of nuclear pre-mRNA domain-containing protein 2 OS=Homo sapiens OX=9606 GN=RPRD2 PE=1 SV=1	Q5VT52-5; Q5VT52; Q5VT52-2; Q5VT52-3	0	1424.75			295787		107376		72426.6			Not Found	Not Found	High	Not Found	Peak Found	Not Found	Peak Found	Not Found	High	3.781e-05	2.831e-07	3.1	72.95
[R].LSSLSLSPANHENQPSEGER.[I]			1.79802e-06	9.16411e-05	1	4	2	Q9Y4F3	Q9Y4F3 [1565-1584]			Meiosis regulator and mRNA stability factor 1 OS=Homo sapiens OX=9606 GN=MARF1 PE=1 SV=6	Q9Y4F3-4; Q9Y4F3; Q9Y4F3-5; Q9Y4F3-3	0	2152.03	156481									High	Not Found	High	Not Found	Not Found	Not Found	Not Found	Not Found	High	3.781e-05	1.179e-07	3.99	44.27
[R].LSSSQGTIETSLQDIDSR.[L]			6.28984e-08	9.16411e-05	1	1	2	Q9UHD2	Q9UHD2 [508-525]			Serine/threonine-protein kinase TBK1 OS=Homo sapiens OX=9606 GN=TBK1 PE=1 SV=1	Q9UHD2	0	1936.95									No Quan Values	Not Found	High	Not Found	Not Found	Not Found	High	Not Found	Not Found	High	3.781e-05	2.303e-09	4.03
[K].LSSTSVYDLTPGEK.[M]			1.03485e-05	9.16411e-05	1	2	2	Q9NRL2	Q9NRL2 [600-613]			Bromodomain adjacent to zinc finger domain protein 1A OS=Homo sapiens OX=9606 GN=BAZ1A PE=1 SV=2	Q9NRL2; Q9NRL2-2	0	1496.75	651817		795410		285373					Peak Found	Not Found	High	Not Found	High	Not Found	Not Found	Not Found	High	3.781e-05	9.082e-07	3.21	55.62
[R].ISSVLAGGSCR.[A]	1xCarbamidomethyl [C10]	1xCarbamidomethyl [C10]	0.000176586	9.16411e-05	2	2	12	P02533; P08779	P02533 [31-41]; P08779 [31-41]			Keratin, type I cytoskeletal 14 OS=Homo sapiens OX=9606 GN=KRT14 PE=1 SV=4 Keratin, type I cytoskeletal 16 OS=Homo sapiens OX=9606 GN=KRT16 PE=1 SV=4	P02533; P08779	0	1106.56	1.68438e+06	412654	1.45673e+06	815803	2.98697e+06	878828	1.15051e+06	821321	Shared	High	High	High	High	High	High	High	High	High	3.781e-05	2.536e-05	3.49	40.35
[K].LSSWDQAETPGHTPSLR.[W]			6.59093e-05	9.16411e-05	1	1	3	O75533	O75533 [215-231]			Splicing factor 3B subunit 1 OS=Homo sapiens OX=9606 GN=SF3B1 PE=1 SV=3	O75533	0	1881.91	129389		223329							High	Not Found	High	Not Found	High	Not Found	Not Found	Not Found	High	3.781e-05	7.996e-06	3.52	50.25
[R].ISSYPEDNFPDEEK.[A]			0.000257598	9.16411e-05	1	1	2	Q9Y4K4	Q9Y4K4 [398-411]			Mitogen-activated protein kinase kinase kinase kinase 5 OS=Homo sapiens OX=9606 GN=MAP4K5 PE=1 SV=2	Q9Y4K4	0	1669.72				646933				221896		Not Found	Not Found	Not Found	High	Not Found	Not Found	Not Found	High	High	3.781e-05	3.946e-05	2.59	52.67
[K].LSTDDLNSLIAHAHR.[R]			5.13733e-07	9.16411e-05	2	4	12	Q16891-4; Q16891-2	Q16891-4 [395-409]; Q16891-2 [385-399]			Isoform 4 of MICOS complex subunit MIC60 OS=Homo sapiens OX=9606 GN=IMMT Isoform 2 of MICOS complex subunit MIC60 OS=Homo sapiens OX=9606 GN=IMMT	Q16891-4; Q16891-2; Q16891-3; Q16891	0	1662.86	224082	1.40078e+07	98336.7	6.34864e+06	355329	6.34894e+06	166434	6570307	Shared	Peak Found	High	Peak Found	High	Peak Found	High	Peak Found	High	High	3.781e-05	2.702e-08	4.63	59.69
[K].LSTDDLNSLIAHAHR.[R]	1xDeamidated [N7]	1xDeamidated [N7]	4.19694e-05	9.16411e-05	2	4	2	Q16891-4; Q16891-2	Q16891-4 [395-409]; Q16891-2 [385-399]			Isoform 4 of MICOS complex subunit MIC60 OS=Homo sapiens OX=9606 GN=IMMT Isoform 2 of MICOS complex subunit MIC60 OS=Homo sapiens OX=9606 GN=IMMT	Q16891-4; Q16891-2; Q16891-3; Q16891	0	1663.84	759652	316819	1113377		589686	819889	521912	323034	Shared	Peak Found	Peak Found	Peak Found	Not Found	Peak Found	High	Peak Found	High	High	3.781e-05	4.67e-06	2.95	50.35
[K].LSTLLNHNNDTEEEER.[L]			0.000197221	9.16411e-05	1	2	1	Q6KC79	Q6KC79 [1279-1294]			Nipped-B-like protein OS=Homo sapiens OX=9606 GN=NIPBL PE=1 SV=2	Q6KC79-2; Q6KC79	0	1913.88									No Quan Values	Not Found	Not Found	Not Found	Not Found	High	Not Found	Not Found	Not Found	High	3.781e-05	2.868e-05	4.01
[K].ISTITPQIQAFNLQK.[A]			6.46926e-06	9.16411e-05	1	2	9	P30260	P30260 [442-456]			Cell division cycle protein 27 homolog OS=Homo sapiens OX=9606 GN=CDC27 PE=1 SV=2	P30260-2; P30260	0	1701.95		2.35091e+06		1.82679e+06		788449		712282		Not Found	High	Not Found	High	Not Found	High	Not Found	High	High	3.781e-05	5.237e-07	3.29	68.74
[K].ISTQLDFASK.[R]			0.000427462	9.16411e-05	1	2	3	P12270	P12270 [714-723]			Nucleoprotein TPR OS=Homo sapiens OX=9606 GN=TPR PE=1 SV=3	P12270-2; P12270	0	1109.58	135717		244941		179812		93889.5			High	Not Found	High	Not Found	High	Not Found	Peak Found	Not Found	High	3.781e-05	7.136e-05	1.93	52.56
[K].ISSSSFIEPIFPTSK.[I]			6.71042e-07	9.16411e-05	1	2	6	Q6ZXV5	Q6ZXV5 [819-833]			Protein O-mannosyl-transferase TMTC3 OS=Homo sapiens OX=9606 GN=TMTC3 PE=1 SV=2	Q6ZXV5; Q6ZXV5-2	0	1639.86		3.46744e+06		730262		1.55e+06		964287		Not Found	High	Not Found	High	Not Found	High	Not Found	High	High	3.781e-05	3.701e-08	4.55	73.34
[R].LSTQSNSNNIEPAR.[T]			6.40837e-07	9.16411e-05	2	4	4	Q14669-2; Q14669	Q14669-2 [1086-1099]; Q14669 [1053-1066]			Isoform 2 of E3 ubiquitin-protein ligase TRIP12 OS=Homo sapiens OX=9606 GN=TRIP12 E3 ubiquitin-protein ligase TRIP12 OS=Homo sapiens OX=9606 GN=TRIP12 PE=1 SV=1	Q14669-2; Q14669-4; Q14669; Q14669-3	0	1530.75			1.38005e+06		742437		191893		Shared	High	Not Found	High	Not Found	High	Not Found	High	Not Found	High	3.781e-05	3.516e-08	3.86	36.12
[K].ISSIQSIVPALEIANAHR.[K]			6.77252e-07	9.16411e-05	1	1	4	P10809	P10809 [251-268]			60 kDa heat shock protein, mitochondrial OS=Homo sapiens OX=9606 GN=HSPD1 PE=1 SV=2	P10809	0	1919.07	102929	459299	369459	435981	179196	402424		144636		Peak Found	Peak Found	High	High	High	High	Not Found	Peak Found	High	3.781e-05	3.752e-08	3.87	70.86
[R].LSSGPEQITLEASSTEGHPGAPSPQHTDQTEAFQK.[G]			2.74605e-07	9.16411e-05	1	4	4	Q6P996	Q6P996 [735-769]			Pyridoxal-dependent decarboxylase domain-containing protein 1 OS=Homo sapiens OX=9606 GN=PDXDC1 PE=1 SV=2	Q6P996-5; Q6P996-3; Q6P996; Q6P996-4	0	3662.72		3.33813e+06		1.67061e+06		694199		737666		Not Found	High	Not Found	High	Not Found	High	Not Found	Peak Found	High	3.781e-05	1.304e-08	8.01	52.63
[K].ISPQLLLAAHR.[F]			0.000212301	9.16411e-05	1	2	2	Q6P4Q7	Q6P4Q7 [546-556]			Metal transporter CNNM4 OS=Homo sapiens OX=9606 GN=CNNM4 PE=1 SV=3	Q6P4Q7; Q6P4Q7-2	0	1218.73		736631		251199		190904				Not Found	High	Not Found	Peak Found	Not Found	High	Not Found	Not Found	High	3.781e-05	3.133e-05	2.22	53.28
[R].ISPVDVNSRPSSCLTNFLLNGR.[S]	1xCarbamidomethyl [C13]; 1xDeamidated [N20]	1xCarbamidomethyl [C13]; 1xDeamidated [N20]	0.00050918	9.16411e-05	1	2	1	Q9NVM9	Q9NVM9 [337-358]			Integrator complex subunit 13 OS=Homo sapiens OX=9606 GN=INTS13 PE=1 SV=2	Q9NVM9-2; Q9NVM9	0	2447.23						237765		68963.3		Not Found	Not Found	Not Found	Not Found	Not Found	High	Not Found	Peak Found	High	3.781e-05	8.734e-05	2.81	72.56
[R].LSQEQVDNFTLDINTAYAR.[L]			6.76918e-09	9.16411e-05	2	4	11	Q16891-4; Q16891-2	Q16891-4 [526-544]; Q16891-2 [516-534]			Isoform 4 of MICOS complex subunit MIC60 OS=Homo sapiens OX=9606 GN=IMMT Isoform 2 of MICOS complex subunit MIC60 OS=Homo sapiens OX=9606 GN=IMMT	Q16891-4; Q16891-2; Q16891-3; Q16891	0	2198.07	256716	13890737	632208	4.80415e+06		6.41306e+06		4.87107e+06	Shared	Peak Found	High	Peak Found	High	Not Found	High	Not Found	High	High	3.781e-05	1.7e-10	5.43	74
[R].LSQEQVDNFTLDINTAYAR.[L]	1xDeamidated [Q/N]	1xDeamidated [Q3; Q5; N8]	3.82675e-06	9.16411e-05	2	4	4	Q16891-4; Q16891-2	Q16891-4 [526-544]; Q16891-2 [516-534]			Isoform 4 of MICOS complex subunit MIC60 OS=Homo sapiens OX=9606 GN=IMMT Isoform 2 of MICOS complex subunit MIC60 OS=Homo sapiens OX=9606 GN=IMMT	Q16891-4; Q16891-2; Q16891-3; Q16891	0	2199.06									No Quan Values	Not Found	High	Not Found	Not Found	Not Found	High	Not Found	High	High	3.781e-05	2.842e-07	4.38
[K].LSQLEEHLSQLQDNPPQEK.[G]			0.000181533	9.16411e-05	1	5	1	Q14980	Q14980 [387-405]			Nuclear mitotic apparatus protein 1 OS=Homo sapiens OX=9606 GN=NUMA1 PE=1 SV=2	Q14980-3; Q14980-5; Q14980-2; Q14980-4; Q14980	0	2233.11									No Quan Values	Not Found	Not Found	Not Found	Not Found	High	Not Found	Not Found	Not Found	High	3.781e-05	2.595e-05	3.68
[R].LSQLEGVNVER.[Y]			0.000179869	9.16411e-05	1	1	5	Q96QK1	Q96QK1 [227-237]			Vacuolar protein sorting-associated protein 35 OS=Homo sapiens OX=9606 GN=VPS35 PE=1 SV=2	Q96QK1	0	1243.66		58067480		13565531		16495703		14326718		Not Found	High	Not Found	High	Not Found	High	Not Found	High	High	3.781e-05	2.59e-05	3.63	48.62
[R].LSQMATILNLER.[V]	1xOxidation [M4]	1xOxidation [M4]	0.000439435	9.16411e-05	1	2	2	Q9H9E3	Q9H9E3 [730-741]			Conserved oligomeric Golgi complex subunit 4 OS=Homo sapiens OX=9606 GN=COG4 PE=1 SV=3	Q9H9E3-3; Q9H9E3	0	1404.75		737899		504851		238796		234587		Not Found	Peak Found	Not Found	High	Not Found	Peak Found	Not Found	High	High	3.781e-05	7.325e-05	2.74	59.2
[K].LSQMAVQGLQQFK.[S]			3.68917e-05	9.16411e-05	1	1	4	Q9UGP8	Q9UGP8 [369-381]			Translocation protein SEC63 homolog OS=Homo sapiens OX=9606 GN=SEC63 PE=1 SV=2	Q9UGP8	0	1477.78		6.91135e+06		914798		271319		694810		Not Found	High	Not Found	High	Not Found	High	Not Found	High	High	3.781e-05	4.036e-06	3.67	60.68
[K].LSQMAVQGLQQFK.[S]	1xOxidation [M4]	1xOxidation [M4]	6.0638e-07	9.16411e-05	1	1	5	Q9UGP8	Q9UGP8 [369-381]			Translocation protein SEC63 homolog OS=Homo sapiens OX=9606 GN=SEC63 PE=1 SV=2	Q9UGP8	0	1493.78		8.07083e+06		4.54373e+06		3.57302e+06		2.40878e+06		Not Found	High	Not Found	Peak Found	Not Found	Peak Found	Not Found	High	High	3.781e-05	3.279e-08	4.75	53.68
[K].ISSILSSLTSVMK.[N]	1xOxidation [M12]	1xOxidation [M12]	3.36376e-06	9.16411e-05	1	4	1	Q5VT52	Q5VT52 [456-468]			Regulation of nuclear pre-mRNA domain-containing protein 2 OS=Homo sapiens OX=9606 GN=RPRD2 PE=1 SV=1	Q5VT52-5; Q5VT52; Q5VT52-2; Q5VT52-3	0	1381.76			262875							Not Found	Not Found	High	Not Found	Not Found	Not Found	Not Found	Not Found	High	3.781e-05	2.431e-07	2.98	68.45
[K].LSQNIAVQTDFK.[T]			3.36453e-05	9.16411e-05	1	1	4	Q8ND24	Q8ND24 [199-210]			RING finger protein 214 OS=Homo sapiens OX=9606 GN=RNF214 PE=1 SV=2	Q8ND24	0	1363.72		794960								Not Found	High	Not Found	High	Not Found	High	Not Found	High	High	3.781e-05	3.613e-06	3.76	53.3
[K].LSQVYIILYDAVTEK.[L]			0.000257598	9.16411e-05	1	2	3	Q9P2K8	Q9P2K8 [1220-1234]			eIF-2-alpha kinase GCN2 OS=Homo sapiens OX=9606 GN=EIF2AK4 PE=1 SV=3	Q9P2K8-2; Q9P2K8	0	1754.96			231909				746185			Not Found	Not Found	High	Not Found	Not Found	Not Found	High	Not Found	High	3.781e-05	3.928e-05	4.06	87.58
[R].LSQYPNENLHSAVTK.[A]			5.84588e-06	9.16411e-05	1	3	4	A3KMH1	A3KMH1 [669-683]			von Willebrand factor A domain-containing protein 8 OS=Homo sapiens OX=9606 GN=VWA8 PE=1 SV=2	A3KMH1; A3KMH1-3; A3KMH1-2	0	1700.86	432892		449597				232824			High	Not Found	High	Not Found	High	Not Found	High	Not Found	High	3.781e-05	4.673e-07	2.84	40.78
[R].ISSADPDKLQTEPLSTSFEISR.[N]			7.02989e-05	9.16411e-05	1	5	1	Q96Q89-3	Q96Q89-3 [1532-1553]			Isoform 3 of Kinesin-like protein KIF20B OS=Homo sapiens OX=9606 GN=KIF20B	Q96Q89-5; Q96Q89-4; Q96Q89-3; Q96Q89; Q96Q89-2	1	2421.21									No Quan Values	Not Found	Not Found	Not Found	Not Found	High	Not Found	Not Found	Not Found	High	3.781e-05	8.577e-06	3.93
[K].LSSAVVFGGGEAR.[L]			9.01476e-05	9.16411e-05	1	1	4	O60934	O60934 [238-250]			Nibrin OS=Homo sapiens OX=9606 GN=NBN PE=1 SV=1	O60934	0	1249.65		2336716		1.76126e+06		855607		1.34873e+06		Not Found	High	Not Found	High	Not Found	High	Not Found	High	High	3.781e-05	1.153e-05	3.76	52.51
[K].LSSCDSFTSTINELNHCLSLR.[T]	2xCarbamidomethyl [C4; C17]	2xCarbamidomethyl [C4; C17]	1.88184e-08	9.16411e-05	1	1	1	P07814	P07814 [89-109]			Bifunctional glutamate/proline--tRNA ligase OS=Homo sapiens OX=9606 GN=EPRS1 PE=1 SV=5	P07814	0	2454.14	85092.6		370663		46618	83621.8				Peak Found	Not Found	High	Not Found	Peak Found	Peak Found	Not Found	Not Found	High	3.781e-05	5.627e-10	6.19	75.98
[K].ISSDQLSSEHLSSAVEQK.[I]			1.66988e-07	9.16411e-05	1	2	4	A3KMH1	A3KMH1 [1335-1352]			von Willebrand factor A domain-containing protein 8 OS=Homo sapiens OX=9606 GN=VWA8 PE=1 SV=2	A3KMH1; A3KMH1-3	0	1944.95	378303				371204		241047			High	Not Found	High	Not Found	High	Not Found	High	Not Found	High	3.781e-05	7.225e-09	5.02	47.09
[K].LSSDVLTLLIK.[Q]			9.79203e-06	9.16411e-05	1	3	1	P36776	P36776 [691-701]			Lon protease homolog, mitochondrial OS=Homo sapiens OX=9606 GN=LONP1 PE=1 SV=2	P36776-2; P36776-3; P36776	0	1201.74									No Quan Values	Not Found	Not Found	Not Found	Not Found	Not Found	High	Not Found	Not Found	High	3.781e-05	8.567e-07	2.71
[K].ISSEPVPGEIIAVR.[V]			8.84632e-07	9.16411e-05	1	1	4	Q969R5	Q969R5 [660-673]			Lethal(3)malignant brain tumor-like protein 2 OS=Homo sapiens OX=9606 GN=L3MBTL2 PE=1 SV=1	Q969R5	0	1466.82		982438		488951		466399		486540		Not Found	High	Not Found	High	Not Found	High	Not Found	High	High	3.781e-05	5.129e-08	3.46	62.98
[R].LSSGFDDIDLPSAVK.[Y]			6.71042e-07	9.16411e-05	1	2	3	Q9Y446	Q9Y446 [312-326]			Plakophilin-3 OS=Homo sapiens OX=9606 GN=PKP3 PE=1 SV=1	Q9Y446-2; Q9Y446	0	1563.79	313804	1.02172e+06	561392		392604	393757	444129	1.0647e+06		Peak Found	High	Peak Found	Not Found	Peak Found	High	Peak Found	High	High	3.781e-05	3.689e-08	4.49	69.97
[R].LSQSLLELWR.[R]			0.000481815	9.16411e-05	1	3	1	Q7L2E3	Q7L2E3 [413-422]			ATP-dependent RNA helicase DHX30 OS=Homo sapiens OX=9606 GN=DHX30 PE=1 SV=1	Q7L2E3-2; Q7L2E3; Q7L2E3-3	0	1244.7									No Quan Values	Not Found	Not Found	Not Found	High	Not Found	Not Found	Not Found	Not Found	High	3.781e-05	8.177e-05	2.39
[K].LSPPYSSPQEFAQDVGR.[M]			1.11398e-05	9.16411e-05	1	2	7	Q13263	Q13263 [751-767]			Transcription intermediary factor 1-beta OS=Homo sapiens OX=9606 GN=TRIM28 PE=1 SV=5	Q13263; Q13263-2	0	1877.9		1.07294e+06	267521	1.17385e+06		787240		668998		Not Found	High	High	High	Not Found	High	Not Found	High	High	3.781e-05	9.892e-07	2.7	65.12
[K].LSTSGNRPPANAETFSCNK.[I]	1xCarbamidomethyl [C17]	1xCarbamidomethyl [C17]	2.59965e-05	9.16411e-05	1	3	3	A6NHR9	A6NHR9 [1417-1435]			Structural maintenance of chromosomes flexible hinge domain-containing protein 1 OS=Homo sapiens OX=9606 GN=SMCHD1 PE=1 SV=2	A6NHR9-2; A6NHR9; A6NHR9-3	0	2050.96	173951		352452		1.35231e+06		210464			Peak Found	Not Found	High	Not Found	High	Not Found	High	Not Found	High	3.781e-05	2.669e-06	4.37	38.52
[K].LSVACFYGGTPYGGQFER.[M]	1xCarbamidomethyl [C5]	1xCarbamidomethyl [C5]	4.81535e-08	9.16411e-05	1	2	12	Q9NR30	Q9NR30 [287-304]			Nucleolar RNA helicase 2 OS=Homo sapiens OX=9606 GN=DDX21 PE=1 SV=5	Q9NR30; Q9NR30-2	0	2008.92		2.93e+06		8738360		1.92509e+06		2.02769e+06		Not Found	High	Not Found	High	Not Found	High	Not Found	High	High	3.781e-05	1.695e-09	4.14	70.93
[R].ITCPQVLIQK.[H]	1xCarbamidomethyl [C3]	1xCarbamidomethyl [C3]	0.000412005	9.16411e-05	1	1	4	Q8IWV7	Q8IWV7 [1367-1376]			E3 ubiquitin-protein ligase UBR1 OS=Homo sapiens OX=9606 GN=UBR1 PE=1 SV=1	Q8IWV7	0	1199.68	887346		1068814		466288		359237			High	Not Found	High	Not Found	High	Not Found	High	Not Found	High	3.781e-05	6.838e-05	2.85	51.55
[K].LTDEDFSPFGSGGGLFSGGK.[G]			7.56746e-05	9.16411e-05	1	8	2	Q641Q2	Q641Q2 [346-365]			WASH complex subunit 2A OS=Homo sapiens OX=9606 GN=WASHC2A PE=1 SV=3	Q9Y4E1-5; Q9Y4E1-2; Q9Y4E1-1; Q9Y4E1-6; Q9Y4E1-3; Q641Q2-2; Q9Y4E1; Q641Q2	0	1974.91			321412							Not Found	Not Found	High	Not Found	Not Found	Not Found	Not Found	Not Found	High	3.781e-05	9.384e-06	3.02	80.3
[R].LTDEQVALVR.[R]			0.000312558	9.16411e-05	1	2	3	Q14137	Q14137 [196-205]			Ribosome biogenesis protein BOP1 OS=Homo sapiens OX=9606 GN=BOP1 PE=1 SV=2	Q14137; Q14137-2	0	1143.64		537850	125217	1.36096e+06		381030		367802		Not Found	High	Peak Found	High	Not Found	High	Not Found	Peak Found	High	3.781e-05	4.916e-05	2.63	50.64
[R].ITDGTMLQAIER.[Y]			5.95585e-05	9.16411e-05	1	2	3	Q9UBF2	Q9UBF2 [131-142]			Coatomer subunit gamma-2 OS=Homo sapiens OX=9606 GN=COPG2 PE=1 SV=1	Q9UBF2-2; Q9UBF2	0	1347.69	9605441	2357579	6.56997e+06	1.8088e+06	4398916	229862	2.65458e+06	1.00348e+06		Peak Found	High	Peak Found	High	Peak Found	Peak Found	Peak Found	High	High	3.781e-05	7.104e-06	3.47	62.49
[R].ITDGTMLQAIER.[Y]	1xOxidation [M6]	1xOxidation [M6]	4.12033e-05	9.16411e-05	1	2	4	Q9UBF2	Q9UBF2 [131-142]			Coatomer subunit gamma-2 OS=Homo sapiens OX=9606 GN=COPG2 PE=1 SV=1	Q9UBF2-2; Q9UBF2	0	1363.69		2624091		1.97856e+06		994680		1.16436e+06		Not Found	High	Not Found	High	Not Found	High	Not Found	High	High	3.781e-05	4.596e-06	3.2	49.72
[R].LTDQEIGDGK.[G]			9.7041e-05	9.16411e-05	1	1	5	Q9Y6D5	Q9Y6D5 [596-605]			Brefeldin A-inhibited guanine nucleotide-exchange protein 2 OS=Homo sapiens OX=9606 GN=ARFGEF2 PE=1 SV=3	Q9Y6D5	0	1075.53	1633572		1.23185e+06		425326	74142.7	321733			High	Not Found	High	Not Found	High	Peak Found	High	Not Found	High	3.781e-05	1.252e-05	2.76	35.06
[K].LTDQLPLIIVCDR.[F]	1xCarbamidomethyl [C11]	1xCarbamidomethyl [C11]	6.17938e-05	9.16411e-05	1	4	3	Q00610	Q00610 [768-780]			Clathrin heavy chain 1 OS=Homo sapiens OX=9606 GN=CLTC PE=1 SV=5	Q00610; P53675-2; P53675; Q00610-2	0	1555.85	145334		1.508e+06		288157					Peak Found	Not Found	High	Not Found	Peak Found	Not Found	High	Not Found	High	3.781e-05	7.347e-06	3.81	77.7
[K].LTEDDLILLEK.[I]			8.2976e-05	9.16411e-05	1	1	1	Q9Y263	Q9Y263 [568-578]			Phospholipase A-2-activating protein OS=Homo sapiens OX=9606 GN=PLAA PE=1 SV=2	Q9Y263	0	1301.72		504779				288772				Not Found	Peak Found	Not Found	Not Found	Not Found	High	Not Found	Not Found	High	3.781e-05	1.043e-05	3.01	71.35
[K].LTEDKETLQYLQQNAK.[E]			5.79353e-05	9.16411e-05	1	2	1	Q9BSJ2	Q9BSJ2 [88-103]			Gamma-tubulin complex component 2 OS=Homo sapiens OX=9606 GN=TUBGCP2 PE=1 SV=2	Q9BSJ2; Q9BSJ2-4	1	1921.99				979498				149567		Not Found	Not Found	Not Found	High	Not Found	Not Found	Not Found	Peak Found	High	3.781e-05	6.857e-06	4.99	51.02
[R].LTCEEEEEKMFGR.[G]	1xCarbamidomethyl [C3]; 1xOxidation [M10]	1xCarbamidomethyl [C3]; 1xOxidation [M10]	0.000513889	9.16411e-05	2	5	2	P51532; P51532-4	P51532 [1357-1369]; P51532-4 [1324-1336]			Transcription activator BRG1 OS=Homo sapiens OX=9606 GN=SMARCA4 PE=1 SV=2 Isoform 4 of Transcription activator BRG1 OS=Homo sapiens OX=9606 GN=SMARCA4	P51532; P51532-5; P51532-2; P51532-4; P51532-3	1	1673.71	584526		558957		214825				Shared	High	Not Found	High	Not Found	Peak Found	Not Found	Not Found	Not Found	High	3.781e-05	8.802e-05	4	40.49
[R].LTEDLEYHELLDR.[A]			1.25539e-06	9.16411e-05	1	1	10	P22059	P22059 [450-462]			Oxysterol-binding protein 1 OS=Homo sapiens OX=9606 GN=OSBP PE=1 SV=1	P22059	0	1645.81	138505			827991	68343.4	2.41622e+06	76984.7	270168		Peak Found	High	Not Found	High	Peak Found	High	Peak Found	High	High	3.781e-05	7.683e-08	4.17	59.56
[R].LTEEETVCLDLDK.[V]	1xCarbamidomethyl [C8]	1xCarbamidomethyl [C8]	2.10332e-05	9.16411e-05	1	3	2	P15924	P15924 [791-803]			Desmoplakin OS=Homo sapiens OX=9606 GN=DSP PE=1 SV=3	P15924; P15924-3; P15924-2	0	1564.74	193544		192537		271471			160461		High	Not Found	Peak Found	Not Found	High	Not Found	Not Found	Peak Found	High	3.781e-05	2.1e-06	3.13	60.82
[R].ITEGDVVVGIASSGLHSNGFSLVR.[K]	1xDeamidated [N18]	1xDeamidated [N18]	4.77354e-06	9.16411e-05	1	1	1	P22102	P22102 [605-628]			Trifunctional purine biosynthetic protein adenosine-3 OS=Homo sapiens OX=9606 GN=GART PE=1 SV=1	P22102	0	2415.25				278668						Not Found	Not Found	Not Found	High	Not Found	Not Found	Not Found	Not Found	High	3.781e-05	3.695e-07	5.37	79.26
[K].LTELENELNTK.[-]			2.6237e-05	9.16411e-05	1	3	2	P55196-3	P55196-3 [1733-1743]			Isoform 3 of Afadin OS=Homo sapiens OX=9606 GN=AFDN	P55196-5; P55196-3; P55196	0	1303.67	425117		484466		787717		404253			High	Not Found	Peak Found	Not Found	Peak Found	Not Found	High	Not Found	High	3.781e-05	2.709e-06	3.43	51.24
[R].LTESDSVLADDILASR.[V]			8.14051e-08	9.16411e-05	1	1	4	Q8IWU2	Q8IWU2 [896-911]			Serine/threonine-protein kinase LMTK2 OS=Homo sapiens OX=9606 GN=LMTK2 PE=1 SV=2	Q8IWU2	0	1704.87	305191									High	Not Found	High	Not Found	High	Not Found	Not Found	Not Found	High	3.781e-05	3.136e-09	4.5	72.35
[R].LTESLDFTDYASR.[I]			3.6545e-06	9.16411e-05	1	1	1	P42345	P42345 [1142-1154]			Serine/threonine-protein kinase mTOR OS=Homo sapiens OX=9606 GN=MTOR PE=1 SV=1	P42345	0	1517.71	124441	416640	260646	265317	123109		122640			Peak Found	Peak Found	High	Peak Found	Peak Found	Not Found	Peak Found	Not Found	High	3.781e-05	2.691e-07	3.06	66.22
[R].LTESPCALVASQYGWSGNMER.[I]	1xCarbamidomethyl [C6]; 1xOxidation [M19]	1xCarbamidomethyl [C6]; 1xOxidation [M19]	4.0442e-06	9.16411e-05	1	1	1	P14625	P14625 [640-660]			Endoplasmin OS=Homo sapiens OX=9606 GN=HSP90B1 PE=1 SV=1	P14625	0	2372.06				723459						Not Found	Not Found	Not Found	High	Not Found	Not Found	Not Found	Not Found	High	3.781e-05	3.015e-07	5.11	67.76
[K].LTETLSEDTLAGR.[L]			5.68515e-07	9.16411e-05	1	2	5	P42694	P42694 [513-525]			Probable helicase with zinc finger domain OS=Homo sapiens OX=9606 GN=HELZ PE=1 SV=2	P42694-2; P42694	0	1405.72									No Quan Values	High	Not Found	High	Not Found	High	Not Found	High	Not Found	High	3.781e-05	3.059e-08	3.68
[K].LTEVLTDSHVK.[V]			0.00015666	9.16411e-05	1	1	6	Q92616	Q92616 [1543-1553]			eIF-2-alpha kinase activator GCN1 OS=Homo sapiens OX=9606 GN=GCN1 PE=1 SV=6	Q92616	0	1241.67	473231		982886		487893					High	Not Found	High	Not Found	High	Not Found	High	Not Found	High	3.781e-05	2.183e-05	2.4	40.92
[K].LTFADELILR.[K]			0.000202746	9.16411e-05	1	1	3	Q8N8K9-2	Q8N8K9-2 [520-529]			Isoform 2 of Uncharacterized protein KIAA1958 OS=Homo sapiens OX=9606 GN=KIAA1958	Q8N8K9-2	0	1190.68		197446		308778		96724.9		192735		Not Found	High	Not Found	High	Not Found	Peak Found	Not Found	High	High	3.781e-05	2.979e-05	2.73	77.03
[R].LTEEDGQLGIAELELQR.[F]			3.45716e-07	9.16411e-05	1	3	3	Q14667	Q14667 [1920-1936]			Protein KIAA0100 OS=Homo sapiens OX=9606 GN=KIAA0100 PE=1 SV=3	Q14667-2; Q14667-3; Q14667	0	1913.98	117615	5289766	147180	3.78212e+06	140645	1.51942e+06		2.33522e+06		High	Peak Found	High	Peak Found	High	Peak Found	Not Found	Peak Found	High	3.781e-05	1.695e-08	3.23	72.28
[K].LSTVGWASQK.[K]			0.00031545	9.16411e-05	1	1	4	Q9NZJ0	Q9NZJ0 [403-412]			Denticleless protein homolog OS=Homo sapiens OX=9606 GN=DTL PE=1 SV=3	Q9NZJ0	0	1076.57				721906		471778				Not Found	High	Not Found	High	Not Found	High	Not Found	High	High	3.781e-05	4.961e-05	2.53	46.06
[R].LTCAPDPSTVRPVAVLK.[K]	1xCarbamidomethyl [C3]	1xCarbamidomethyl [C3]	7.22685e-05	9.16411e-05	1	2	4	Q96PV6	Q96PV6 [564-580]			Leukocyte receptor cluster member 8 OS=Homo sapiens OX=9606 GN=LENG8 PE=1 SV=3	Q96PV6; Q96PV6-1	0	1824		505581		513085		163177		469618		Not Found	High	Not Found	High	Not Found	High	Not Found	High	High	3.781e-05	8.912e-06	3.31	55.04
[K].LTASEQAHPQEPAESAHEPR.[L]			4.60189e-05	9.16411e-05	1	3	6	Q02952	Q02952 [350-369]			A-kinase anchor protein 12 OS=Homo sapiens OX=9606 GN=AKAP12 PE=1 SV=4	Q02952; Q02952-3; Q02952-2	0	2185.03	326426		584925		473180		136806			High	Not Found	High	Not Found	High	Not Found	High	Not Found	High	3.781e-05	5.223e-06	3.63	32.55
[R].LSVEEAVAAGVVGGEIQEK.[L]			8.14051e-08	9.16411e-05	1	1	5	P58107	P58107 [2281-2299]; [2817-2835]; [3348-3366]; [3882-3900]; [4416-4434]; [4949-4967]			Epiplakin OS=Homo sapiens OX=9606 GN=EPPK1 PE=1 SV=3	P58107	0	1884.99	197335		978063		620459					High	Not Found	High	Not Found	High	Not Found	Not Found	Not Found	High	3.781e-05	3.122e-09	4.67	73.57
[R].ISVIFSLEELKEIEK.[D]			7.42416e-08	9.16411e-05	1	3	4	Q96RT7	Q96RT7 [624-638]			Gamma-tubulin complex component 6 OS=Homo sapiens OX=9606 GN=TUBGCP6 PE=1 SV=3	Q96RT7-2; Q96RT7; Q96RT7-3	1	1777	112225		304838				127759			High	Not Found	High	Not Found	High	Not Found	High	Not Found	High	3.781e-05	2.809e-09	5.24	77.85
[R].LSVLQQELNAFTR.[K]			1.02536e-05	9.16411e-05	1	3	4	O94964-2	O94964-2 [717-729]			Isoform 2 of Protein SOGA1 OS=Homo sapiens OX=9606 GN=SOGA1	O94964-2; O94964; O94964-4	0	1518.83	155117		413015		161553		301703			High	Not Found	High	Not Found	High	Not Found	High	Not Found	High	3.781e-05	9.003e-07	3	76.12
[R].ISVQTPVDQLLQDGLQLR.[S]			8.29392e-07	9.16411e-05	1	3	6	O95248-4	O95248-4 [968-985]			Isoform 4 of Myotubularin-related protein 5 OS=Homo sapiens OX=9606 GN=SBF1	O95248-5; O95248; O95248-4	0	2023.12					540662		611134			Not Found	Not Found	Not Found	Not Found	High	Not Found	High	Not Found	High	3.781e-05	4.749e-08	4.28	87.33
[R].LSVSSNDTQESGNSSGPSPGAK.[F]			0.000362174	9.16411e-05	1	1	5	Q9Y6D6	Q9Y6D6 [393-414]			Brefeldin A-inhibited guanine nucleotide-exchange protein 1 OS=Homo sapiens OX=9606 GN=ARFGEF1 PE=1 SV=2	Q9Y6D6	0	2105.96	171807		462377		123509					High	Not Found	High	Not Found	High	Not Found	Not Found	Not Found	High	3.781e-05	5.862e-05	1.87	38.58
[K].ISVTNEHSESTLNVMSGK.[K]			0.000133955	9.16411e-05	1	1	1	P42356	P42356 [538-555]			Phosphatidylinositol 4-kinase alpha OS=Homo sapiens OX=9606 GN=PI4KA PE=1 SV=4	P42356	0	1932.93									No Quan Values	Not Found	Not Found	Not Found	Not Found	High	Not Found	Not Found	Not Found	High	3.781e-05	1.819e-05	3.28
[R].ISVYYNEATGGK.[Y]			1.97198e-05	9.16411e-05	1	1	7	P07437	P07437 [47-58]			Tubulin beta chain OS=Homo sapiens OX=9606 GN=TUBB PE=1 SV=2	P07437	0	1301.64	298291	694692	774411	820599	342284	479347	112938	337133		High	Peak Found	High	High	High	High	High	High	High	3.781e-05	1.944e-06	2.89	46.93
[K].LSYFNELETINTK.[L]			4.31356e-06	9.16411e-05	1	2	4	Q96JB2	Q96JB2 [197-209]			Conserved oligomeric Golgi complex subunit 3 OS=Homo sapiens OX=9606 GN=COG3 PE=1 SV=3	Q96JB2; Q96JB2-2	0	1571.8		932827		630783		306029	119171	383797		Not Found	High	Not Found	High	Not Found	High	Peak Found	High	High	3.781e-05	3.285e-07	3.2	68.52
[R].ITADGAHFELR.[L]			0.000130304	9.16411e-05	1	1	2	Q8IWX8	Q8IWX8 [201-211]			Calcium homeostasis endoplasmic reticulum protein OS=Homo sapiens OX=9606 GN=CHERP PE=1 SV=3	Q8IWX8	0	1229.63		549144		173569				150995		Not Found	Peak Found	Not Found	Peak Found	Not Found	High	Not Found	High	High	3.781e-05	1.769e-05	2.73	47.49
[K].LTAYTATPEAIYGTSHVAISPSHR.[L]			6.01097e-05	9.16411e-05	1	1	2	Q15031	Q15031 [296-319]			Probable leucine--tRNA ligase, mitochondrial OS=Homo sapiens OX=9606 GN=LARS2 PE=1 SV=2	Q15031	0	2543.29	88127.1	344787	93726		104796			161748		Peak Found	Peak Found	Peak Found	High	Peak Found	Not Found	Not Found	High	High	3.781e-05	7.136e-06	4.83	55.23
[R].ITAEIFSPNDKK.[S]			0.000295757	9.16411e-05	1	7	4	Q96SU4	Q96SU4 [605-616]			Oxysterol-binding protein-related protein 9 OS=Homo sapiens OX=9606 GN=OSBPL9 PE=1 SV=2	Q96SU4-3; Q96SU4-2; Q96SU4-4; Q96SU4; Q96SU4-6; Q96SU4-5; Q96SU4-7	1	1362.73				636358		375026		362785		Not Found	High	Not Found	High	Not Found	High	Not Found	High	High	3.781e-05	4.629e-05	2.93	45.36
[K].LTALADLEDWEELEK.[F]			1.38892e-07	9.16411e-05	1	2	5	Q9H269	Q9H269 [731-745]			Vacuolar protein sorting-associated protein 16 homolog OS=Homo sapiens OX=9606 GN=VPS16 PE=1 SV=2	Q9H269; Q9H269-2	0	1774.87		2.20688e+06		769979		494681		1.16108e+06		Not Found	High	Not Found	High	Not Found	High	Not Found	High	High	3.781e-05	5.863e-09	4.12	83.66
[R].LTAIDILTTCAADIQR.[Q]	1xCarbamidomethyl [C10]	1xCarbamidomethyl [C10]	1.7317e-09	9.16411e-05	1	1	7	O75643	O75643 [1571-1586]			U5 small nuclear ribonucleoprotein 200 kDa helicase OS=Homo sapiens OX=9606 GN=SNRNP200 PE=1 SV=2	O75643	0	1774.94	234820		1.25269e+06		1.14961e+06	200770	395124	291774		High	Not Found	High	Not Found	High	Peak Found	High	Peak Found	High	3.781e-05	3.432e-11	3.63	83.28
[K].ITALEDISTEDGDR.[L]			4.19496e-07	9.16411e-05	1	1	4	O43264	O43264 [668-681]			Centromere/kinetochore protein zw10 homolog OS=Homo sapiens OX=9606 GN=ZW10 PE=1 SV=3	O43264	0	1534.72		2.94355e+06		1.5956e+06		1.10268e+06		1.04554e+06		Not Found	High	Not Found	High	Not Found	High	Not Found	High	High	3.781e-05	2.127e-08	4.18	57.03
[R].LTAIIEEAEEAPGARPQLQDAWR.[G]			0.000103504	9.16411e-05	1	1	3	P58107	P58107 [2571-2593]; [3107-3129]; [3638-3660]; [4172-4194]; [4708-4730]			Epiplakin OS=Homo sapiens OX=9606 GN=EPPK1 PE=1 SV=3	P58107	0	2564.31			605370		402962					High	Not Found	High	Not Found	High	Not Found	Not Found	Not Found	High	3.781e-05	1.352e-05	3.91	68.67
[K].LTALLGNDNYK.[Q]			0.000333369	9.16411e-05	1	4	5	Q92845	Q92845 [390-400]			Kinesin-associated protein 3 OS=Homo sapiens OX=9606 GN=KIFAP3 PE=1 SV=2	Q92845; Q92845-4; Q92845-3; Q92845-2	0	1221.65		1.56828e+06		890795				420243		Not Found	High	Not Found	High	Not Found	High	Not Found	High	High	3.781e-05	5.329e-05	2.46	53.12
[K].LTAIQSLPWWTLR.[C]			5.90125e-05	9.16411e-05	1	1	5	Q6P3X3	Q6P3X3 [175-187]			Tetratricopeptide repeat protein 27 OS=Homo sapiens OX=9606 GN=TTC27 PE=1 SV=1	Q6P3X3	0	1584.89		1.442e+06		844272						Not Found	High	Not Found	High	Not Found	High	Not Found	High	High	3.781e-05	6.991e-06	2.8	85.53
[R].ITAQENDMEVELPAAANSR.[K]	1xOxidation [M8]	1xOxidation [M8]	1.65375e-09	9.16411e-05	1	2	8	Q99661	Q99661 [122-140]			Kinesin-like protein KIF2C OS=Homo sapiens OX=9606 GN=KIF2C PE=1 SV=2	Q99661; Q99661-2	0	2074.97		1.32069e+06		730768		801093		886705		Not Found	High	Not Found	High	Not Found	High	Not Found	High	High	3.781e-05	3.247e-11	4.53	53.06
[K].ITAQGQYELR.[V]			0.000490769	9.16411e-05	1	6	2	P24821	P24821 [2064-2073]			Tenascin OS=Homo sapiens OX=9606 GN=TNC PE=1 SV=3	P24821-6; P24821-3; P24821-4; P24821; P24821-5; P24821-2	0	1178.62			284516		205213	221636	53394.2	161723		Not Found	Not Found	High	Not Found	Peak Found	Peak Found	High	Peak Found	High	3.781e-05	8.351e-05	2.66	42.5
[K].ITAQSIEELCAVNLYGPDAQVDR.[S]	1xCarbamidomethyl [C10]	1xCarbamidomethyl [C10]	2.43614e-07	9.16411e-05	1	2	3	P78527	P78527 [1423-1445]			DNA-dependent protein kinase catalytic subunit OS=Homo sapiens OX=9606 GN=PRKDC PE=1 SV=3	P78527-2; P78527	0	2562.25	140308		328679		312390					High	Not Found	High	Not Found	High	Not Found	Not Found	Not Found	High	3.781e-05	1.126e-08	3.92	77.82
[R].LTAGLGSLIPEGDAGPDAAGPDAAGPLLPGRPQVK.[L]			2.85048e-05	9.16411e-05	1	1	2	O75976	O75976 [99-133]			Carboxypeptidase D OS=Homo sapiens OX=9606 GN=CPD PE=1 SV=2	O75976	0	3278.74	45263.2		478509	127342	65378.9	122606				Peak Found	Not Found	High	Peak Found	Peak Found	Peak Found	Not Found	Not Found	High	3.781e-05	2.975e-06	3.74	76.44
[R].IPIEDKDLINTANWR.[V]			7.29222e-06	9.16411e-05	1	2	2	Q14574	Q14574 [376-390]			Desmocollin-3 OS=Homo sapiens OX=9606 GN=DSC3 PE=1 SV=3	Q14574-2; Q14574	1	1797.95	163338			662252			128067			High	Not Found	Not Found	High	Not Found	Not Found	Peak Found	Not Found	High	3.781e-05	6.027e-07	4.45	63.13
[R].ISPIQKPQGLDPVEILQER.[E]			2.02724e-05	9.16411e-05	1	2	4	P51531	P51531 [328-346]			Probable global transcription activator SNF2L2 OS=Homo sapiens OX=9606 GN=SMARCA2 PE=1 SV=2	P51531-2; P51531	0	2160.2	485361		963293		329956		162743			High	Not Found	High	Not Found	High	Not Found	High	Not Found	High	3.781e-05	1.991e-06	4.12	68.85
[R].LSPAWLELLPHGR.[L]			6.64889e-07	9.16411e-05	1	1	6	Q9Y4R8	Q9Y4R8 [70-82]			Telomere length regulation protein TEL2 homolog OS=Homo sapiens OX=9606 GN=TELO2 PE=1 SV=2	Q9Y4R8	0	1488.83		2.58422e+06		1.58521e+06		758546		389723		Not Found	High	Not Found	High	Not Found	High	Not Found	High	High	3.781e-05	3.663e-08	3.27	74.29
[R].ISDTGLAAGTVPEK.[Q]			3.52144e-07	9.16411e-05	1	2	7	Q7LBC6	Q7LBC6 [436-449]			Lysine-specific demethylase 3B OS=Homo sapiens OX=9606 GN=KDM3B PE=1 SV=2	Q7LBC6; Q7LBC6-2	0	1358.72	2.42305e+06		2295137		1.25997e+06		1.03646e+06			High	Not Found	High	Not Found	High	Not Found	High	Not Found	High	3.781e-05	1.748e-08	4.47	47.7
[K].LSEDSVSVLVLR.[C]			1.49586e-05	9.16411e-05	1	1	1	P50748	P50748 [378-389]			Kinetochore-associated protein 1 OS=Homo sapiens OX=9606 GN=KNTC1 PE=1 SV=1	P50748	0	1316.74					391929					Not Found	Not Found	Not Found	Not Found	High	Not Found	Not Found	Not Found	High	3.781e-05	1.408e-06	3.62	68.74
[R].LSEEASQALIEAYVDMR.[K]	1xOxidation [M16]	1xOxidation [M16]	1.48215e-05	9.16411e-05	1	1	4	P33991	P33991 [702-718]			DNA replication licensing factor MCM4 OS=Homo sapiens OX=9606 GN=MCM4 PE=1 SV=5	P33991	0	1940.93		242938	40488.9	526824	53070.1	239293	84421.6	214382		Not Found	Peak Found	Peak Found	High	Peak Found	High	Peak Found	High	High	3.781e-05	1.38e-06	2.54	76.08
[K].LSEEVVVAPNQESGMK.[T]	1xOxidation [M15]	1xOxidation [M15]	1.76563e-05	9.16411e-05	1	4	3	Q6PJT7	Q6PJT7 [474-489]			Zinc finger CCCH domain-containing protein 14 OS=Homo sapiens OX=9606 GN=ZC3H14 PE=1 SV=1	Q6PJT7; Q6PJT7-5; Q6PJT7-2; Q6PJT7-9	0	1732.84						149647		328185		Not Found	Not Found	Not Found	High	Not Found	High	Not Found	High	High	3.781e-05	1.704e-06	3.49	48.1
[R].LSEIAWQGSGGNEK.[Y]			7.3579e-07	9.16411e-05	1	3	4	Q9UG01	Q9UG01 [387-400]			Intraflagellar transport protein 172 homolog OS=Homo sapiens OX=9606 GN=IFT172 PE=1 SV=2	Q9UG01-3; Q9UG01; Q9UG01-2	0	1475.71	480340		780337		340547		364020			High	Not Found	High	Not Found	High	Not Found	High	Not Found	High	3.781e-05	4.119e-08	3.91	49.76
[K].LSELEPGTGDLR.[F]			0.000123299	9.16411e-05	1	1	4	P58107	P58107 [188-199]			Epiplakin OS=Homo sapiens OX=9606 GN=EPPK1 PE=1 SV=3	P58107	0	1286.66					369221					High	Not Found	High	Not Found	High	Not Found	High	Not Found	High	3.781e-05	1.664e-05	3.56	51.78
[R].LSELLDQAPEGR.[G]			2.43732e-05	9.16411e-05	1	2	3	Q9UDY8	Q9UDY8 [41-52]			Mucosa-associated lymphoid tissue lymphoma translocation protein 1 OS=Homo sapiens OX=9606 GN=MALT1 PE=1 SV=1	Q9UDY8-2; Q9UDY8	0	1327.69								167024		Not Found	Not Found	Not Found	High	Not Found	High	Not Found	High	High	3.781e-05	2.475e-06	3.11	53.71
[R].ISELQWSVMDQEMR.[V]	2xOxidation [M9; M13]	2xOxidation [M9; M13]	3.12552e-05	9.16411e-05	1	2	3	Q9Y6D9	Q9Y6D9 [166-179]			Mitotic spindle assembly checkpoint protein MAD1 OS=Homo sapiens OX=9606 GN=MAD1L1 PE=1 SV=2	Q9Y6D9; Q9Y6D9-3	0	1783.8		513796				174416		176787		Not Found	High	Not Found	Not Found	Not Found	High	Not Found	High	High	3.781e-05	3.309e-06	2.57	59.99
[K].ISEPEADVESVLGVSNLLQVLQKPK.[S]			1.44034e-09	9.16411e-05	1	2	4	O94822	O94822 [502-526]			E3 ubiquitin-protein ligase listerin OS=Homo sapiens OX=9606 GN=LTN1 PE=1 SV=6	O94822-3; O94822	0	2692.48					870068		484880			High	Not Found	High	Not Found	High	Not Found	High	Not Found	High	3.781e-05	2.768e-11	6.19	88.85
[R].LSDNTPEHYLVQGR.[Y]			9.01476e-05	9.16411e-05	1	1	5	Q9ULE6	Q9ULE6 [85-98]			Paladin OS=Homo sapiens OX=9606 GN=PALD1 PE=1 SV=3	Q9ULE6	0	1628.8		2.61782e+06	193242	1.65144e+06		503303		1.28691e+06		Not Found	High	Peak Found	High	Not Found	High	Not Found	High	High	3.781e-05	1.153e-05	3.29	47.76
[K].LSEPEEELLQQFK.[R]			4.81878e-05	9.16411e-05	1	1	1	Q9Y2U8	Q9Y2U8 [446-458]			Inner nuclear membrane protein Man1 OS=Homo sapiens OX=9606 GN=LEMD3 PE=1 SV=2	Q9Y2U8	0	1589.81		206871		307371	64677.3	163604				Not Found	Peak Found	Not Found	High	Peak Found	Peak Found	Not Found	Not Found	High	3.781e-05	5.507e-06	2.66	72.39
[R].LSEQLAHTPTAFK.[R]			0.000133955	9.16411e-05	1	3	3	Q9UBF8	Q9UBF8 [510-522]			Phosphatidylinositol 4-kinase beta OS=Homo sapiens OX=9606 GN=PI4KB PE=1 SV=1	Q9UBF8-2; Q9UBF8-3; Q9UBF8	0	1442.76				465689	46203.3		17291.4	851233		Not Found	High	Not Found	High	Peak Found	Not Found	Peak Found	High	High	3.781e-05	1.822e-05	3.13	44.57
[K].LSEQNPAASYYNVDVLK.[Y]			0.000504513	9.16411e-05	1	2	3	Q0JRZ9	Q0JRZ9 [642-658]			F-BAR domain only protein 2 OS=Homo sapiens OX=9606 GN=FCHO2 PE=1 SV=2	Q0JRZ9; Q0JRZ9-3	0	1910.95		503301								Not Found	High	Not Found	High	Not Found	Not Found	Not Found	High	High	3.781e-05	8.6e-05	3	65.66
[R].ISETTMLQSGMK.[V]	2xOxidation [M6; M11]	2xOxidation [M6; M11]	2.5282e-06	9.16411e-05	3	6	4	P55196-2; P55196-1; P55196-3	P55196-2 [461-472]; P55196-1 [461-472]; P55196-3 [461-472]			Isoform 1 of Afadin OS=Homo sapiens OX=9606 GN=AFDN Isoform 2 of Afadin OS=Homo sapiens OX=9606 GN=AFDN Isoform 3 of Afadin OS=Homo sapiens OX=9606 GN=AFDN	P55196-5; P55196-6; P55196-2; P55196-1; P55196-3; P55196	0	1357.63	375415		799502		295958				Shared	High	Not Found	High	Not Found	High	Not Found	High	Not Found	High	3.781e-05	1.754e-07	3.03	35.84
[K].LSEVTFRPLFFK.[L]			0.000464394	9.16411e-05	1	1	2	Q9H583	Q9H583 [1907-1918]			HEAT repeat-containing protein 1 OS=Homo sapiens OX=9606 GN=HEATR1 PE=1 SV=3	Q9H583	0	1483.83			58303.1		719480		103649			Not Found	Not Found	Peak Found	Not Found	High	Not Found	Peak Found	Not Found	High	3.781e-05	7.808e-05	4.07	68.94
[K].LSEYPNVEELR.[N]			5.79353e-05	9.16411e-05	1	2	1	Q9NZN5	Q9NZN5 [1001-1011]			Rho guanine nucleotide exchange factor 12 OS=Homo sapiens OX=9606 GN=ARHGEF12 PE=1 SV=1	Q9NZN5; Q9NZN5-2	0	1348.67		2358941		2.39758e+06			696572			Not Found	Peak Found	Not Found	Peak Found	Not Found	Not Found	High	Not Found	High	3.781e-05	6.841e-06	2.34	56.87
[K].ISFDNEYFNQSDFSSVAMTR.[S]	1xOxidation [M18]	1xOxidation [M18]	9.61513e-05	9.16411e-05	1	3	2	O60333	O60333 [1034-1053]			Kinesin-like protein KIF1B OS=Homo sapiens OX=9606 GN=KIF1B PE=1 SV=5	O60333-4; O60333; O60333-2	0	2374.03									No Quan Values	High	Not Found	High	Not Found	Not Found	Not Found	Not Found	Not Found	High	3.781e-05	1.235e-05	2.19
[R].LSFLVSYIASK.[K]			0.000202746	9.16411e-05	1	1	5	P47897	P47897 [69-79]			Glutamine--tRNA ligase OS=Homo sapiens OX=9606 GN=QARS1 PE=1 SV=1	P47897	0	1227.7		7940652		2.29583e+06		1439304		2.76114e+06		Not Found	High	Not Found	High	Not Found	High	Not Found	High	High	3.781e-05	2.961e-05	3.24	73.78
[R].LSFQHDPETSVLVLR.[K]			1.9539e-05	9.16411e-05	1	2	4	Q14697	Q14697 [915-929]			Neutral alpha-glucosidase AB OS=Homo sapiens OX=9606 GN=GANAB PE=1 SV=3	Q14697; Q14697-2	0	1740.93	100392	448159	433760	1.63147e+06	122836	1.19184e+06		298070		High	High	High	High	Peak Found	Peak Found	Not Found	Peak Found	High	3.781e-05	1.919e-06	4.43	62.69
[R].ISGALFTNDK.[F]	1xDeamidated [N8]	1xDeamidated [N8]	0.000589987	9.16411e-05	1	2	1	A6NHR9	A6NHR9 [509-518]			Structural maintenance of chromosomes flexible hinge domain-containing protein 1 OS=Homo sapiens OX=9606 GN=SMCHD1 PE=1 SV=2	A6NHR9-2; A6NHR9	0	1066.54			84777.4		274587					Not Found	Not Found	Peak Found	Not Found	High	Not Found	Not Found	Not Found	High	3.781e-05	0.000104	2.86	53.72
[R].ISEQFTAMFR.[R]			0.00015239	9.16411e-05	2	7	2	P07437; P68371	P07437 [381-390]; P68371 [381-390]			Tubulin beta chain OS=Homo sapiens OX=9606 GN=TUBB PE=1 SV=2 Tubulin beta-4B chain OS=Homo sapiens OX=9606 GN=TUBB4B PE=1 SV=1	Q13885; Q13509; P04350; Q13509-2; P07437; P68371; Q9BVA1	0	1229.6	133963	152695	310392		92094.9				Shared	High	Peak Found	High	Not Found	Peak Found	Not Found	Not Found	Not Found	High	3.781e-05	2.123e-05	2.14	65.86
[R].LSGEMPPASPSFPR.[N]	1xOxidation [M5]	1xOxidation [M5]	0.000646876	9.16411e-05	1	2	1	Q96JM7	Q96JM7 [600-613]			Lethal(3)malignant brain tumor-like protein 3 OS=Homo sapiens OX=9606 GN=L3MBTL3 PE=1 SV=2	Q96JM7-2; Q96JM7	0	1488.72		695662		294813				467262		Not Found	Peak Found	Not Found	Peak Found	Not Found	Not Found	Not Found	High	High	3.781e-05	0.000116	2.6	51.02
[R].LSDGFVAAEAK.[T]			8.37438e-05	9.16411e-05	1	2	4	Q6R327	Q6R327 [364-374]			Rapamycin-insensitive companion of mTOR OS=Homo sapiens OX=9606 GN=RICTOR PE=1 SV=1	Q6R327; Q6R327-3	0	1107.57	803272		1.52728e+06		524913		295572			High	Not Found	High	Not Found	High	Not Found	High	Not Found	High	3.781e-05	1.053e-05	3.64	47.38
[K].LSDFDREHFSEVFVDLK.[W]			4.55755e-07	9.16411e-05	1	3	6	Q8IZH2	Q8IZH2 [343-359]			5'-3' exoribonuclease 1 OS=Homo sapiens OX=9606 GN=XRN1 PE=1 SV=1	Q8IZH2; Q8IZH2-2; Q8IZH2-3	1	2083.01	390466		876465		113139		705602			High	Not Found	High	Not Found	Peak Found	Not Found	High	Not Found	High	3.781e-05	2.346e-08	5.54	68.05
[R].IRPLEVPTTAGPASASTPTDGAK.[K]			3.89879e-05	9.16411e-05	1	2	3	Q9ULL5	Q9ULL5 [1176-1198]			Proline-rich protein 12 OS=Homo sapiens OX=9606 GN=PRR12 PE=1 SV=3	Q9ULL5; Q9ULL5-2	0	2237.18					132217		69672.2			High	Not Found	Not Found	Not Found	High	Not Found	High	Not Found	High	3.781e-05	4.308e-06	3	51.69
[R].IRPLNSEGTLNLLNCEPPR.[L]	1xCarbamidomethyl [C15]	1xCarbamidomethyl [C15]	7.49287e-08	9.16411e-05	1	1	3	Q9Y5S2	Q9Y5S2 [1503-1521]			Serine/threonine-protein kinase MRCK beta OS=Homo sapiens OX=9606 GN=CDC42BPB PE=1 SV=2	Q9Y5S2	0	2193.14	510091	5544359	592932	526223		178256	291178			High	Peak Found	High	Peak Found	Not Found	Peak Found	High	Not Found	High	3.781e-05	2.833e-09	4.87	62.17
[R].IRPLNSEGTLNLLNCEPPR.[L]	1xCarbamidomethyl [C15]; 1xDeamidated [N14]	1xCarbamidomethyl [C15]; 1xDeamidated [N14]	6.96544e-05	9.16411e-05	1	1	2	Q9Y5S2	Q9Y5S2 [1503-1521]			Serine/threonine-protein kinase MRCK beta OS=Homo sapiens OX=9606 GN=CDC42BPB PE=1 SV=2	Q9Y5S2	0	2194.13									No Quan Values	Not Found	Not Found	High	Not Found	Not Found	Not Found	Not Found	Not Found	High	3.781e-05	8.507e-06	4.47
[K].IRPPADWQPPFAVEVDNFR.[F]			3.01175e-06	9.16411e-05	2	7	3	P41229; Q9BY66	P41229 [46-64]; Q9BY66 [46-64]			Lysine-specific demethylase 5C OS=Homo sapiens OX=9606 GN=KDM5C PE=1 SV=2 Lysine-specific demethylase 5D OS=Homo sapiens OX=9606 GN=KDM5D PE=1 SV=2	Q9BY66-2; P41229-5; P41229-3; P41229; Q9BY66; Q9BY66-3; P41229-2	0	2254.14			817904		169167				Shared	Not Found	Not Found	High	Not Found	High	Not Found	High	Not Found	High	3.781e-05	2.14e-07	3.89	75.72
[R].LRPVNPNPLATK.[G]			0.000635076	9.16411e-05	1	1	8	P51116	P51116 [122-133]			Fragile X mental retardation syndrome-related protein 2 OS=Homo sapiens OX=9606 GN=FXR2 PE=1 SV=2	P51116	0	1319.78		5.4127e+06		4.31071e+06		2.10609e+06		2.45008e+06		Not Found	High	Not Found	High	Not Found	High	Not Found	High	High	3.781e-05	0.0001126	3.24	41.69
[K].LRQELGICPAVK.[Q]	1xCarbamidomethyl [C8]	1xCarbamidomethyl [C8]	0.000584581	9.16411e-05	1	1	3	P27708	P27708 [890-901]			CAD protein OS=Homo sapiens OX=9606 GN=CAD PE=1 SV=3	P27708	1	1383.78	211722		635255		601714					High	Not Found	High	Not Found	High	Not Found	Not Found	Not Found	High	3.781e-05	0.0001021	2.51	44.37
[K].LSAAEEIQGDGPK.[K]			2.55159e-06	9.16411e-05	1	3	2	Q86TB9	Q86TB9 [443-455]			Protein PAT1 homolog 1 OS=Homo sapiens OX=9606 GN=PATL1 PE=1 SV=2	Q86TB9-4; Q86TB9-2; Q86TB9	0	1314.65		2.13788e+06		2487190		1.08648e+06		911338		Not Found	Peak Found	Not Found	High	Not Found	High	Not Found	Peak Found	High	3.781e-05	1.772e-07	3.81	44.8
[R].LSAAGSSHGLVR.[S]			0.00011349	9.16411e-05	1	2	2	Q9HCJ0	Q9HCJ0 [1616-1627]			Trinucleotide repeat-containing gene 6C protein OS=Homo sapiens OX=9606 GN=TNRC6C PE=1 SV=3	Q9HCJ0; Q9HCJ0-2	0	1154.63			255123							High	Not Found	High	Not Found	Not Found	Not Found	Not Found	Not Found	High	3.781e-05	1.505e-05	3.42	32.49
[K].LSADTYEDLK.[A]			0.000573916	9.16411e-05	1	3	2	Q8IY22	Q8IY22 [747-756]			C-Maf-inducing protein OS=Homo sapiens OX=9606 GN=CMIP PE=1 SV=3	Q8IY22-2; Q8IY22; Q8IY22-3	0	1154.56									No Quan Values	Not Found	High	Not Found	Not Found	Not Found	Not Found	Not Found	High	High	3.781e-05	0.0001	1.75
[R].LSDGEINAQESTYK.[V]			1.62477e-06	9.16411e-05	1	2	2	Q2KHR3	Q2KHR3 [585-598]			Glutamine and serine-rich protein 1 OS=Homo sapiens OX=9606 GN=QSER1 PE=1 SV=3	Q2KHR3-2; Q2KHR3	0	1554.73	121190				224918		60953			High	Not Found	Not Found	Not Found	High	Not Found	Peak Found	Not Found	High	3.781e-05	1.041e-07	3.47	44.12
[R].LSAEDLVLEGAGLR.[V]			1.23217e-07	9.16411e-05	1	1	6	P11047	P11047 [590-603]			Laminin subunit gamma-1 OS=Homo sapiens OX=9606 GN=LAMC1 PE=1 SV=3	P11047	0	1442.78	385262		1.19339e+06		298736		432599			High	Not Found	High	Not Found	High	Not Found	High	Not Found	High	3.781e-05	5.062e-09	3.92	78.72
[K].LSAHVDDSGSQSR.[T]			0.000379239	9.16411e-05	1	1	1	Q5VW36	Q5VW36 [1169-1181]			Focadhesin OS=Homo sapiens OX=9606 GN=FOCAD PE=1 SV=1	Q5VW36	0	1358.63									No Quan Values	Not Found	Not Found	High	Not Found	Not Found	Not Found	Not Found	Not Found	High	3.781e-05	6.169e-05	2.75
[K].ISAILHPSTYLNK.[I]			1.15579e-05	9.16411e-05	1	1	3	Q8NI36	Q8NI36 [207-219]			WD repeat-containing protein 36 OS=Homo sapiens OX=9606 GN=WDR36 PE=1 SV=1	Q8NI36	0	1456.82		298870		514702		156473		243815		Not Found	Peak Found	Not Found	High	Not Found	High	Not Found	High	High	3.781e-05	1.038e-06	3.14	51.32
[R].LSAITMALQYGSESEEDAALAAAR.[Y]	1xOxidation [M6]	1xOxidation [M6]	4.55755e-07	9.16411e-05	1	9	4	Q86U86	Q86U86 [342-365]			Protein polybromo-1 OS=Homo sapiens OX=9606 GN=PBRM1 PE=1 SV=1	Q86U86-5; Q86U86-7; Q86U86-4; Q86U86; Q86U86-6; Q86U86-9; Q86U86-8; Q86U86-2; Q86U86-3	0	2484.19	88666		277762		167805	67160.2	115725			High	Not Found	High	Not Found	High	Peak Found	High	Not Found	High	3.781e-05	2.345e-08	4.23	76.18
[K].ISAPELLLHSPAR.[S]			0.00049989	9.16411e-05	1	1	1	Q5VUA4	Q5VUA4 [1887-1899]			Zinc finger protein 318 OS=Homo sapiens OX=9606 GN=ZNF318 PE=1 SV=2	Q5VUA4	0	1403.8			184671				97696.3			Not Found	Not Found	Peak Found	Not Found	Not Found	Not Found	High	Not Found	High	3.781e-05	8.522e-05	2.63	57.67
[R].LSAQAQVAEDILDK.[Y]			8.52631e-07	9.16411e-05	1	6	1	Q14C86	Q14C86 [1022-1035]			GTPase-activating protein and VPS9 domain-containing protein 1 OS=Homo sapiens OX=9606 GN=GAPVD1 PE=1 SV=2	Q14C86; Q14C86-5; Q14C86-3; Q14C86-2; Q14C86-4; Q14C86-6	0	1500.79			430048							Not Found	Not Found	High	Not Found	Not Found	Not Found	Not Found	Not Found	High	3.781e-05	4.893e-08	3.61	64.11
[R].LSAQAQVAEDILDKYR.[N]			5.04479e-06	9.16411e-05	1	6	1	Q14C86	Q14C86 [1022-1037]			GTPase-activating protein and VPS9 domain-containing protein 1 OS=Homo sapiens OX=9606 GN=GAPVD1 PE=1 SV=2	Q14C86; Q14C86-5; Q14C86-3; Q14C86-2; Q14C86-4; Q14C86-6	1	1819.95			1.20418e+06		139856		75953.9			Not Found	Not Found	High	Not Found	Peak Found	Not Found	Peak Found	Not Found	High	3.781e-05	3.91e-07	5.25	67.02
[K].LSATESIVEIVK.[Q]			6.5305e-05	9.16411e-05	1	3	4	O43432	O43432 [366-377]			Eukaryotic translation initiation factor 4 gamma 3 OS=Homo sapiens OX=9606 GN=EIF4G3 PE=1 SV=2	O43432; O43432-3; O43432-2	0	1288.74	1355678		1.3765e+06		1.13756e+06		951995			High	Not Found	High	Not Found	High	Not Found	High	Not Found	High	3.781e-05	7.874e-06	3.56	66.24
[R].LSCQNLGAVLDDVPVQGFFK.[K]	1xCarbamidomethyl [C3]	1xCarbamidomethyl [C3]	6.89844e-07	9.16411e-05	1	1	6	Q14690	Q14690 [359-378]			Protein RRP5 homolog OS=Homo sapiens OX=9606 GN=PDCD11 PE=1 SV=3	Q14690	0	2207.12	583214		782645	3.78233e+06	145451	750948	347141			Peak Found	Not Found	High	Peak Found	High	Peak Found	High	Not Found	High	3.781e-05	3.822e-08	4.82	87.26
[K].LSDADLAGPLQK.[E]			0.000304041	9.16411e-05	1	1	1	Q15021	Q15021 [441-452]			Condensin complex subunit 1 OS=Homo sapiens OX=9606 GN=NCAPD2 PE=1 SV=3	Q15021	0	1227.66	74558		287527		153248		31532.9			Peak Found	Not Found	High	Not Found	Peak Found	Not Found	Peak Found	Not Found	High	3.781e-05	4.769e-05	2.78	55.27
[K].LSAGESISLDEFK.[S]			6.8383e-05	9.16411e-05	1	1	2	Q8IYU8	Q8IYU8 [307-319]			Calcium uptake protein 2, mitochondrial OS=Homo sapiens OX=9606 GN=MICU2 PE=1 SV=2	Q8IYU8	0	1395.7	131519	515341	130361	297467		282076				Peak Found	Peak Found	Peak Found	High	Not Found	High	Not Found	Not Found	High	3.781e-05	8.281e-06	2.03	65.4
[R].LSPGGSLADAWAHQEGTHPK.[D]			0.000295757	9.16411e-05	1	1	2	Q9UHD2	Q9UHD2 [526-545]			Serine/threonine-protein kinase TBK1 OS=Homo sapiens OX=9606 GN=TBK1 PE=1 SV=1	Q9UHD2	0	2059						193828		120230		Not Found	High	Not Found	Not Found	Not Found	Peak Found	Not Found	High	High	3.781e-05	4.627e-05	3.76	49.49
[K].ISGESMESTPELLLISSLEDTNETR.[N]	1xOxidation [M6]	1xOxidation [M6]	0.000109385	9.16411e-05	1	2	1	Q7Z401	Q7Z401 [978-1002]			C-myc promoter-binding protein OS=Homo sapiens OX=9606 GN=DENND4A PE=1 SV=2	Q7Z401; Q7Z401-2	0	2767.32									No Quan Values	Not Found	Not Found	Not Found	Not Found	Not Found	Not Found	High	Not Found	High	3.781e-05	1.437e-05	2.28
[R].ISGETIFVTAPHEATAGIIGVNR.[K]	1xDeamidated [N22]	1xDeamidated [N22]	6.01097e-05	9.16411e-05	1	2	1	Q00610	Q00610 [298-320]			Clathrin heavy chain 1 OS=Homo sapiens OX=9606 GN=CLTC PE=1 SV=5	Q00610; Q00610-2	0	2354.24									No Quan Values	Not Found	Not Found	Not Found	Not Found	Not Found	Not Found	High	Not Found	High	3.781e-05	7.114e-06	5.45
[K].ISLPVILMDETLK.[F]			1.97151e-06	9.16411e-05	1	5	4	P16615	P16615 [972-984]			Sarcoplasmic/endoplasmic reticulum calcium ATPase 2 OS=Homo sapiens OX=9606 GN=ATP2A2 PE=1 SV=1	P16615-3; P16615-2; P16615; P16615-4; P16615-5	0	1471.84	138701	1.01284e+06		921659		213958		485525		Peak Found	High	Not Found	High	Not Found	High	Not Found	High	High	3.781e-05	1.309e-07	2.92	86.19
[K].ISLPVILMDETLK.[F]	1xOxidation [M8]	1xOxidation [M8]	5.63563e-05	9.16411e-05	1	5	4	P16615	P16615 [972-984]			Sarcoplasmic/endoplasmic reticulum calcium ATPase 2 OS=Homo sapiens OX=9606 GN=ATP2A2 PE=1 SV=1	P16615-3; P16615-2; P16615; P16615-4; P16615-5	0	1487.84	99710.6	760285	107927	795312		333929		466451		Peak Found	High	Peak Found	High	Not Found	High	Not Found	High	High	3.781e-05	6.648e-06	2.56	77.9
[K].ISLQAIQQLVR.[K]			0.000269737	9.16411e-05	1	2	1	O75694	O75694 [776-786]			Nuclear pore complex protein Nup155 OS=Homo sapiens OX=9606 GN=NUP155 PE=1 SV=1	O75694; O75694-2	0	1268.77									No Quan Values	Not Found	Not Found	High	Not Found	Not Found	Not Found	Not Found	Not Found	High	3.781e-05	4.16e-05	2.73
[K].LSIQDNNVDLILATPPFSR.[QL]			6.52753e-07	9.16411e-05	2	7	6	Q8NFD5; O14497	Q8NFD5 [2076-2094]; O14497 [2125-2143]			AT-rich interactive domain-containing protein 1B OS=Homo sapiens OX=9606 GN=ARID1B PE=1 SV=2 AT-rich interactive domain-containing protein 1A OS=Homo sapiens OX=9606 GN=ARID1A PE=1 SV=3	Q8NFD5-3; Q8NFD5; Q8NFD5-2; Q8NFD5-4; O14497; O14497-3; O14497-2	0	2113.13					143052		598255		Shared	Not Found	Not Found	High	Not Found	High	Not Found	High	Not Found	High	3.781e-05	3.585e-08	3.31	85.55
[K].LSLQEQDAAIVK.[N]			0.000104462	9.16411e-05	1	2	6	Q9Y6D9	Q9Y6D9 [232-243]			Mitotic spindle assembly checkpoint protein MAD1 OS=Homo sapiens OX=9606 GN=MAD1L1 PE=1 SV=2	Q9Y6D9; Q9Y6D9-3	0	1314.73		3.52736e+06		728877		1.25593e+06		1.21547e+06		Not Found	High	Not Found	High	Not Found	High	Not Found	High	High	3.781e-05	1.362e-05	3.83	53.83
[K].ISLSNESNKVNGN.[-]	1xDeamidated [N11]	1xDeamidated [N11]	6.35117e-06	9.16411e-05	1	2	3	P06737	P06737 [835-847]			Glycogen phosphorylase, liver form OS=Homo sapiens OX=9606 GN=PYGL PE=1 SV=4	P06737-2; P06737	1	1376.67		1.9508e+06		1.70937e+06		469269		1164947		Not Found	High	Not Found	High	Not Found	Peak Found	Not Found	High	High	3.781e-05	5.12e-07	4.43	41.05
[K].ISLSPFSTTDSAYEWK.[M]			4.8611e-07	9.16411e-05	1	3	4	Q9UPY3	Q9UPY3 [1467-1482]			Endoribonuclease Dicer OS=Homo sapiens OX=9606 GN=DICER1 PE=1 SV=3	Q9UPY3; Q9UPY3-2; Q9UPY3-3	0	1831.87	444718	318361	142597		721436		494036			Peak Found	Peak Found	High	Not Found	High	Not Found	High	Not Found	High	3.781e-05	2.546e-08	3.66	75.24
[R].ISISTSGGSFR.[N]			0.000248282	9.16411e-05	1	1	11	P13647	P13647 [74-84]			Keratin, type II cytoskeletal 5 OS=Homo sapiens OX=9606 GN=KRT5 PE=1 SV=3	P13647	0	1111.57	3.56406e+06	2.43803e+06	3.21723e+06	10126435	3620930	1.72877e+06	1.64243e+06	1.85924e+06		High	Peak Found	High	High	High	High	High	High	High	3.781e-05	3.762e-05	3.02	48.85
[K].LSLVDLAGSER.[A]			3.89879e-05	9.16411e-05	4	9	6	O43896; Q12756; O60333; Q9NQT8	O43896 [244-254]; Q12756 [244-254]; O60333 [244-254]; Q9NQT8 [249-259]			Kinesin-like protein KIF1C OS=Homo sapiens OX=9606 GN=KIF1C PE=1 SV=3 Kinesin-like protein KIF1A OS=Homo sapiens OX=9606 GN=KIF1A PE=1 SV=2 Kinesin-like protein KIF1B OS=Homo sapiens OX=9606 GN=KIF1B PE=1 SV=5 Kinesin-like protein KIF13B OS=Homo sapiens OX=9606 GN=KIF13B PE=1 SV=2	Q12756-2; O60333-3; O43896; Q12756-3; Q12756; O60333-4; O60333; O60333-2; Q9NQT8	0	1159.63	845258		1.55774e+06		903580		727024		Shared	High	Not Found	High	Not Found	High	Not Found	High	Not Found	High	3.781e-05	4.286e-06	3.16	65.35
[R].LSIPTYGLQCTR.[A]	1xCarbamidomethyl [C10]	1xCarbamidomethyl [C10]	0.000132727	9.16411e-05	1	1	4	P49327	P49327 [2264-2275]			Fatty acid synthase OS=Homo sapiens OX=9606 GN=FASN PE=1 SV=3	P49327	0	1408.73	806942		1.55367e+06		1070232		376751			High	Not Found	High	Not Found	High	Not Found	High	Not Found	High	3.781e-05	1.804e-05	2.94	62.75
[R].ISLVLGGDHSLAIGSISGHAR.[V]			3.86305e-05	9.16411e-05	1	3	2	P05089	P05089 [93-113]			Arginase-1 OS=Homo sapiens OX=9606 GN=ARG1 PE=1 SV=2	P05089-3; P05089; P05089-2	0	2060.12	62803.9			1.47832e+06		210938				Peak Found	Not Found	Not Found	High	Not Found	Peak Found	Not Found	Not Found	High	3.781e-05	4.248e-06	3.86	61.45
[R].LSMSLMEQLLK.[T]			3.49081e-05	9.16411e-05	1	2	2	Q5SRE5	Q5SRE5 [1399-1409]			Nucleoporin NUP188 homolog OS=Homo sapiens OX=9606 GN=NUP188 PE=1 SV=1	Q5SRE5; Q5SRE5-2	0	1292.7			892722							Not Found	Not Found	High	Not Found	High	Not Found	Not Found	Not Found	High	3.781e-05	3.797e-06	3.01	80.4
[R].LSMSLMEQLLK.[T]	1xOxidation [M3]	1xOxidation [M3]	0.000170199	9.16411e-05	1	2	1	Q5SRE5	Q5SRE5 [1399-1409]			Nucleoporin NUP188 homolog OS=Homo sapiens OX=9606 GN=NUP188 PE=1 SV=1	Q5SRE5; Q5SRE5-2	0	1308.69			735604							Not Found	Not Found	High	Not Found	Not Found	Not Found	Not Found	Not Found	High	3.781e-05	2.41e-05	3.83	71.16
[R].LSMSLMEQLLK.[T]	2xOxidation [M3; M6]	2xOxidation [M3; M6]	0.000179869	9.16411e-05	1	2	3	Q5SRE5	Q5SRE5 [1399-1409]			Nucleoporin NUP188 homolog OS=Homo sapiens OX=9606 GN=NUP188 PE=1 SV=1	Q5SRE5; Q5SRE5-2	0	1324.69			1.32706e+06		191183					Not Found	Not Found	High	Not Found	High	Not Found	Not Found	Not Found	High	3.781e-05	2.583e-05	2.62	56.15
[K].ISNAQLQTELVEILK.[N]			8.76305e-08	9.16411e-05	1	1	6	Q93034	Q93034 [729-743]			Cullin-5 OS=Homo sapiens OX=9606 GN=CUL5 PE=1 SV=4	Q93034	0	1698.96		3.65048e+06		2.01691e+06		979965		1.69026e+06		Not Found	High	Not Found	High	Not Found	High	Not Found	High	High	3.781e-05	3.393e-09	5.29	81.35
[K].LSNEIETATR.[S]			6.8383e-05	9.16411e-05	1	4	5	Q96Q89-3	Q96Q89-3 [924-933]			Isoform 3 of Kinesin-like protein KIF20B OS=Homo sapiens OX=9606 GN=KIF20B	Q96Q89-4; Q96Q89-3; Q96Q89; Q96Q89-2	0	1133.58	282185		387817		765475		231143			High	Not Found	High	Not Found	High	Not Found	High	Not Found	High	3.781e-05	8.329e-06	2.81	39.23
[K].LSNGLLVHGPQCHSENEAK.[E]	1xCarbamidomethyl [C12]; 1xDeamidated [N3]	1xCarbamidomethyl [C12]; 1xDeamidated [N3]	0.000190088	9.16411e-05	1	2	1	Q8IZH2	Q8IZH2 [1476-1494]			5'-3' exoribonuclease 1 OS=Homo sapiens OX=9606 GN=XRN1 PE=1 SV=1	Q8IZH2; Q8IZH2-2	0	2090.99	319260		257652				152651			High	Not Found	Peak Found	Not Found	Not Found	Not Found	Peak Found	Not Found	High	3.781e-05	2.751e-05	3.45	41
[R].ISNLIVLHLR.[K]			0.000358854	9.16411e-05	1	1	1	Q14566	Q14566 [723-732]			DNA replication licensing factor MCM6 OS=Homo sapiens OX=9606 GN=MCM6 PE=1 SV=1	Q14566	0	1177.74		236276		754927				139653		Not Found	Peak Found	Not Found	High	Not Found	Not Found	Not Found	Peak Found	High	3.781e-05	5.771e-05	3.32	59.68
[R].LSNLPTVDPIAVCHELYNTIR.[D]	1xCarbamidomethyl [C13]	1xCarbamidomethyl [C13]	8.60901e-05	9.16411e-05	1	9	4	Q86U86	Q86U86 [38-58]			Protein polybromo-1 OS=Homo sapiens OX=9606 GN=PBRM1 PE=1 SV=1	Q86U86-5; Q86U86-7; Q86U86-4; Q86U86; Q86U86-6; Q86U86-9; Q86U86-8; Q86U86-2; Q86U86-3	0	2425.25	311227		492209		330508		575440			High	Not Found	High	Not Found	High	Not Found	High	Not Found	High	3.781e-05	1.088e-05	4.25	78.42
[R].ISPAIDYTYDSDILK.[G]			1.2667e-07	9.16411e-05	1	2	8	Q9P2K8	Q9P2K8 [1039-1053]			eIF-2-alpha kinase GCN2 OS=Homo sapiens OX=9606 GN=EIF2AK4 PE=1 SV=3	Q9P2K8-2; Q9P2K8	0	1713.86			3.802e+06		714277		7.62188e+06			High	Not Found	High	Not Found	High	Not Found	High	Not Found	High	3.781e-05	5.249e-09	3.82	71.07
[K].LSMKPLGEGPPDPK.[S]			0.000617778	9.16411e-05	1	1	1	Q9Y6D5	Q9Y6D5 [384-397]			Brefeldin A-inhibited guanine nucleotide-exchange protein 2 OS=Homo sapiens OX=9606 GN=ARFGEF2 PE=1 SV=3	Q9Y6D5	0	1465.77									No Quan Values	High	Not Found	Not Found	Not Found	Not Found	Not Found	Not Found	Not Found	High	3.781e-05	0.0001089	2.25
[R].ISGETIFVTAPHEATAGIIGVNR.[K]			6.46449e-09	9.16411e-05	1	2	9	Q00610	Q00610 [298-320]			Clathrin heavy chain 1 OS=Homo sapiens OX=9606 GN=CLTC PE=1 SV=5	Q00610; Q00610-2	0	2353.25	1.01668e+06		1.01565e+07	190121	1.16857e+06		663384	74383.8		High	Not Found	High	Peak Found	High	Not Found	High	Peak Found	High	3.781e-05	1.61e-10	6	68.22
[R].ISLPLPNFSSLNLR.[E]			3.39567e-05	9.16411e-05	1	1	4	P08670	P08670 [411-424]			Vimentin OS=Homo sapiens OX=9606 GN=VIM PE=1 SV=4	P08670	0	1570.9			302158		231565		238156			Not Found	Not Found	High	Not Found	High	Not Found	High	High	High	3.781e-05	3.666e-06	2.46	84.79
[R].ISILPQKPYNDIGIGQSQDDSIVGLR.[Q]			0.000122168	9.16411e-05	1	1	3	Q9Y4G8	Q9Y4G8 [542-567]			Rap guanine nucleotide exchange factor 2 OS=Homo sapiens OX=9606 GN=RAPGEF2 PE=1 SV=1	Q9Y4G8	0	2826.5									No Quan Values	High	Not Found	High	Not Found	Not Found	Not Found	Not Found	Not Found	High	3.781e-05	1.64e-05	2.92
[R].ISGETIFVTAPHEATAGIIGVNRK.[G]			1.55163e-06	9.16411e-05	1	2	3	Q00610	Q00610 [298-321]			Clathrin heavy chain 1 OS=Homo sapiens OX=9606 GN=CLTC PE=1 SV=5	Q00610; Q00610-2	1	2481.35	179707		2.53333e+06		201126		107447			High	Not Found	High	Not Found	Peak Found	Not Found	Peak Found	Not Found	High	3.781e-05	9.822e-08	5.37	61.15
[R].LSGGLGAGSCR.[L]	1xCarbamidomethyl [C10]	1xCarbamidomethyl [C10]	0.000101615	9.16411e-05	1	1	5	Q04695	Q04695 [31-41]			Keratin, type I cytoskeletal 17 OS=Homo sapiens OX=9606 GN=KRT17 PE=1 SV=2	Q04695	0	1034.5	289792					777687				High	Not Found	Not Found	Not Found	High	High	High	High	High	3.781e-05	1.326e-05	2.9	33.94
[K].LSGPDDDPLHKQPR.[F]			0.000362174	9.16411e-05	1	3	1	Q86TI2	Q86TI2 [577-590]			Dipeptidyl peptidase 9 OS=Homo sapiens OX=9606 GN=DPP9 PE=1 SV=3	Q86TI2-2; Q86TI2; Q86TI2-4	1	1574.79									No Quan Values	Not Found	Not Found	Not Found	Not Found	Not Found	High	Not Found	Not Found	High	3.781e-05	5.851e-05	2.67
[R].ISGSLVDTSYK.[T]			8.60901e-05	9.16411e-05	1	5	1	Q9BTX1	Q9BTX1 [618-628]			Nucleoporin NDC1 OS=Homo sapiens OX=9606 GN=NDC1 PE=1 SV=2	Q9BTX1-2; Q9BTX1; Q9BTX1-5; Q9BTX1-3; Q9BTX1-6	0	1169.6						366831		571040		Not Found	Not Found	Not Found	Not Found	Not Found	Peak Found	Not Found	High	High	3.781e-05	1.083e-05	1.85	47.97
[R].ISGVATDIQALK.[A]			1.31488e-05	9.16411e-05	1	4	3	Q12979	Q12979 [684-695]			Active breakpoint cluster region-related protein OS=Homo sapiens OX=9606 GN=ABR PE=1 SV=2	Q12979; Q12979-3; Q12979-2; Q12979-4	0	1215.69				449351				446021		Not Found	High	Not Found	High	Not Found	Not Found	Not Found	High	High	3.781e-05	1.206e-06	3.75	56.55
[R].ISGVGIDQPPYGIFVINQK.[T]			5.37682e-09	9.16411e-05	1	1	18	Q02413	Q02413 [87-105]			Desmoglein-1 OS=Homo sapiens OX=9606 GN=DSG1 PE=1 SV=2	Q02413	0	2045.11	1.27444e+06			8120174	659585	411040	690756			High	High	High	High	High	High	High	High	High	3.781e-05	1.297e-10	4.79	79.98
[K].LSGVQQPSEGVGGGR.[C]			2.00768e-07	9.16411e-05	1	2	6	Q9H9E3	Q9H9E3 [10-24]			Conserved oligomeric Golgi complex subunit 4 OS=Homo sapiens OX=9606 GN=COG4 PE=1 SV=3	Q9H9E3; Q9H9E3-2	0	1427.72	38898.9	3.26259e+06		1.62712e+06		665322		742900		Peak Found	High	Not Found	High	Not Found	High	Not Found	High	High	3.781e-05	8.972e-09	4.16	39.38
[R].LSHFSLQPVLDSLYSK.[G]			8.2976e-05	9.16411e-05	1	3	4	Q96RT7	Q96RT7 [410-425]			Gamma-tubulin complex component 6 OS=Homo sapiens OX=9606 GN=TUBGCP6 PE=1 SV=3	Q96RT7-2; Q96RT7; Q96RT7-3	0	1833.97	352900		575740		156263		259689			High	Not Found	High	Not Found	High	Not Found	High	Not Found	High	3.781e-05	1.038e-05	3.72	73.1
[K].LSHSNPTILFDYILSQIQK.[Y]			7.3597e-06	9.16411e-05	1	1	3	Q8NI27	Q8NI27 [571-589]			THO complex subunit 2 OS=Homo sapiens OX=9606 GN=THOC2 PE=1 SV=2	Q8NI27	0	2217.19							673806			Not Found	Not Found	High	Not Found	High	Not Found	High	Not Found	High	3.781e-05	6.09e-07	3.6	89.1
[K].LSLNSLQLVSEWRPVVEK.[L]			1.23277e-05	9.16411e-05	1	3	4	Q6YHU6	Q6YHU6 [934-951]			Thyroid adenoma-associated protein OS=Homo sapiens OX=9606 GN=THADA PE=1 SV=1	Q6YHU6-2; Q6YHU6-3; Q6YHU6	0	2097.17	812097		650442		304157		190330			High	Not Found	High	Not Found	High	Not Found	High	Not Found	High	3.781e-05	1.12e-06	6.05	76.67
[R].LSKDPPELHAAASSESTGFGEER.[E]			0.000149609	9.16411e-05	1	4	4	Q9ULH0	Q9ULH0 [1745-1767]			Kinase D-interacting substrate of 220 kDa OS=Homo sapiens OX=9606 GN=KIDINS220 PE=1 SV=3	Q9ULH0-5; Q9ULH0-2; Q9ULH0-4; Q9ULH0	1	2415.14	380141		424239		147660					High	Not Found	High	Not Found	High	Not Found	High	Not Found	High	3.781e-05	2.083e-05	3.41	45.01
[R].LSLDDLLQR.[L]			0.000386287	9.16411e-05	1	1	5	P27708	P27708 [1723-1731]			CAD protein OS=Homo sapiens OX=9606 GN=CAD PE=1 SV=3	P27708	0	1072.6	593072	184606	2.44058e+06		1.36022e+06	83841.1	649527	35700.8		High	Peak Found	High	Not Found	High	Peak Found	High	Peak Found	High	3.781e-05	6.326e-05	2.68	76.37
[R].LSLDLLSQMSPGDLAK.[V]	1xOxidation [M9]	1xOxidation [M9]	1.16621e-06	9.16411e-05	1	3	4	Q6UWE0	Q6UWE0 [595-610]			E3 ubiquitin-protein ligase LRSAM1 OS=Homo sapiens OX=9606 GN=LRSAM1 PE=1 SV=1	Q6UWE0-2; Q6UWE0-3; Q6UWE0	0	1703.89	50909	564553		358724		173074		420746		Peak Found	High	Not Found	High	Not Found	High	Not Found	High	High	3.781e-05	7.031e-08	3.55	74.42
[K].LSLDVEIATYR.[QR]			0.00052828	9.16411e-05	2	3	4	Q7Z794; Q8N1N4	Q7Z794 [457-467]; Q8N1N4 [404-414]			Keratin, type II cytoskeletal 1b OS=Homo sapiens OX=9606 GN=KRT77 PE=1 SV=3 Keratin, type II cytoskeletal 78 OS=Homo sapiens OX=9606 GN=KRT78 PE=1 SV=2	Q7Z794; Q8N1N4-2; Q8N1N4	0	1279.69	77827.9		163370	212084	143203	391914	70158.1		Shared	Peak Found	Not Found	High	Peak Found	High	High	High	Not Found	High	3.781e-05	9.117e-05	3.14	69.17
[K].LSIFDANESGFESYEALPQHK.[L]			7.5622e-08	9.16411e-05	2	3	6	P26358; P26358-2	P26358 [386-406]; P26358-2 [402-422]			DNA (cytosine-5)-methyltransferase 1 OS=Homo sapiens OX=9606 GN=DNMT1 PE=1 SV=2 Isoform 2 of DNA (cytosine-5)-methyltransferase 1 OS=Homo sapiens OX=9606 GN=DNMT1	P26358-3; P26358; P26358-2	0	2382.12	2811388		3.70486e+06		1.78915e+06		1.23404e+06		Shared	High	Not Found	High	Not Found	High	Not Found	High	Not Found	High	3.781e-05	2.868e-09	6.28	71.68
[R].ISIGGGSCAISGGYGSR.[A]	1xCarbamidomethyl [C8]	1xCarbamidomethyl [C8]	2.10127e-09	9.16411e-05	2	3	4	P04259; P02538	P04259 [70-86]; P02538 [70-86]			Keratin, type II cytoskeletal 6B OS=Homo sapiens OX=9606 GN=KRT6B PE=1 SV=5 Keratin, type II cytoskeletal 6A OS=Homo sapiens OX=9606 GN=KRT6A PE=1 SV=3	P04259; P02538; P48668	0	1598.76					744805		482702	299977	Shared	Not Found	Not Found	Not Found	Not Found	High	Not Found	High	High	High	3.781e-05	4.332e-11	4.32	52.75
[R].LSLHEEEGSSGSEQK.[Q]			0.000107388	9.16411e-05	1	5	2	Q12955	Q12955 [4341-4355]			Ankyrin-3 OS=Homo sapiens OX=9606 GN=ANK3 PE=1 SV=3	Q12955-4; Q12955; Q12955-6; Q12955-7; Q12955-5	0	1616.74	87430.3						157972			High	Not Found	Not Found	Not Found	Not Found	Not Found	High	Not Found	High	3.781e-05	1.415e-05	2.29	32.23
[K].LSLLADEVDVLSR.[M]			0.000105428	9.16411e-05	1	1	3	Q9NXD2	Q9NXD2 [682-694]			Myotubularin-related protein 10 OS=Homo sapiens OX=9606 GN=MTMR10 PE=1 SV=3	Q9NXD2	0	1429.79								128791		Not Found	High	Not Found	Not Found	Not Found	High	Not Found	High	High	3.781e-05	1.382e-05	2.78	77.97
[K].LSIIGEVLSR.[R]			0.000447602	9.16411e-05	1	3	2	Q8IWA4	Q8IWA4 [64-73]			Mitofusin-1 OS=Homo sapiens OX=9606 GN=MFN1 PE=1 SV=3	Q8IWA4-3; Q8IWA4; Q8IWA4-2	0	1086.65		368528				651992				Not Found	High	Not Found	Not Found	Not Found	High	Not Found	Not Found	High	3.781e-05	7.503e-05	2.6	71.46
[K].ISLLPNDEDSLPPLLVASGEK.[G]			2.10332e-05	9.16411e-05	1	1	3	Q7Z3T8	Q7Z3T8 [1012-1032]			Zinc finger FYVE domain-containing protein 16 OS=Homo sapiens OX=9606 GN=ZFYVE16 PE=1 SV=3	Q7Z3T8	0	2207.18									No Quan Values	Not Found	Not Found	High	Not Found	High	Not Found	High	Not Found	High	3.781e-05	2.085e-06	2.43
[K].LSLAQEDLISNR.[N]			2.79845e-05	9.16411e-05	1	1	2	Q15075	Q15075 [1056-1067]			Early endosome antigen 1 OS=Homo sapiens OX=9606 GN=EEA1 PE=1 SV=2	Q15075	0	1358.73			496389							Not Found	Not Found	High	Not Found	High	Not Found	Not Found	Not Found	High	3.781e-05	2.912e-06	3.38	59.77
[K].LPIAPLIMGSHPVDNK.[W]	1xOxidation [M8]	1xOxidation [M8]	7.15911e-06	9.16411e-05	1	2	4	Q15648	Q15648 [268-283]			Mediator of RNA polymerase II transcription subunit 1 OS=Homo sapiens OX=9606 GN=MED1 PE=1 SV=4	Q15648-3; Q15648	0	1717.93	348651		616023		376457		168220			High	Not Found	High	Not Found	High	Not Found	High	Not Found	High	3.781e-05	5.932e-07	4.3	56.74
[K].LPIAPLIMGSHPVDNK.[W]			1.01596e-05	9.16411e-05	1	2	1	Q15648	Q15648 [268-283]			Mediator of RNA polymerase II transcription subunit 1 OS=Homo sapiens OX=9606 GN=MED1 PE=1 SV=4	Q15648-3; Q15648	0	1701.94	142990									High	Not Found	Not Found	Not Found	Not Found	Not Found	Not Found	Not Found	High	3.781e-05	8.889e-07	3.96	63.03
[K].LPKPQLEQPYSDR.[W]			1.03485e-05	9.16411e-05	1	1	2	Q8IWU2	Q8IWU2 [370-382]			Serine/threonine-protein kinase LMTK2 OS=Homo sapiens OX=9606 GN=LMTK2 PE=1 SV=2	Q8IWU2	0	1570.82	98333.8		544366							High	Not Found	High	Not Found	Not Found	Not Found	Not Found	Not Found	High	3.781e-05	9.103e-07	3.64	45.24
[K].ILQMAEGIDIGEMPSYDLVLSKPSK.[G]	1xOxidation [M4]	1xOxidation [M4]	2.50502e-06	9.16411e-05	1	2	1	O15226	O15226 [4-28]			NF-kappa-B-repressing factor OS=Homo sapiens OX=9606 GN=NKRF PE=1 SV=2	O15226; O15226-2	0	2750.4									No Quan Values	Not Found	Not Found	Not Found	High	Not Found	Not Found	Not Found	Not Found	High	3.781e-05	1.734e-07	4.1
[K].ILQMAEGIDIGEMPSYDLVLSKPSK.[G]	2xOxidation [M4; M13]	2xOxidation [M4; M13]	2.20031e-09	9.16411e-05	1	2	5	O15226	O15226 [4-28]			NF-kappa-B-repressing factor OS=Homo sapiens OX=9606 GN=NKRF PE=1 SV=2	O15226; O15226-2	0	2766.39				1.52959e+06		910413		1.83474e+06		Not Found	High	Not Found	High	Not Found	High	Not Found	High	High	3.781e-05	4.56e-11	8.24	69.46
[K].LIQNLILDLKPR.[G]			2.87619e-06	9.16411e-05	1	1	3	Q9NQX4	Q9NQX4 [1374-1385]			Unconventional myosin-Vc OS=Homo sapiens OX=9606 GN=MYO5C PE=1 SV=2	Q9NQX4	0	1435.9	75905.1		121572				134374			High	Not Found	High	Not Found	Not Found	Not Found	High	Not Found	High	3.781e-05	2.044e-07	3.48	68.62
[R].LLQPVVDTILVK.[C]			0.000181533	9.16411e-05	1	1	1	Q13233	Q13233 [679-690]			Mitogen-activated protein kinase kinase kinase 1 OS=Homo sapiens OX=9606 GN=MAP3K1 PE=1 SV=4	Q13233	0	1337.84			302201							Not Found	Not Found	High	Not Found	Not Found	Not Found	Not Found	Not Found	High	3.781e-05	2.617e-05	2.26	72.95
[R].LLQQLAMTGSEEGDPR.[T]	1xOxidation [M7]	1xOxidation [M7]	2.50502e-06	9.16411e-05	1	6	2	Q14C86	Q14C86 [347-362]			GTPase-activating protein and VPS9 domain-containing protein 1 OS=Homo sapiens OX=9606 GN=GAPVD1 PE=1 SV=2	Q14C86; Q14C86-5; Q14C86-3; Q14C86-2; Q14C86-4; Q14C86-6	0	1760.85	49432.9		1.10525e+06							Peak Found	Not Found	High	Not Found	Not Found	Not Found	Not Found	Not Found	High	3.781e-05	1.735e-07	3.52	53.15
[R].LLQQLQTLDSPELR.[T]			0.000119938	9.16411e-05	1	7	6	P49815	P49815 [368-381]			Tuberin OS=Homo sapiens OX=9606 GN=TSC2 PE=1 SV=2	P49815-5; P49815-7; P49815-4; P49815; P49815-3; P49815-2; P49815-6	0	1653.92	276131						132722			High	Not Found	High	Not Found	Not Found	Not Found	High	Not Found	High	3.781e-05	1.6e-05	3.43	67.74
[K].IIQQVLQGLDYLHTK.[C]			9.18236e-05	9.16411e-05	1	3	1	Q96SB4	Q96SB4 [192-206]			SRSF protein kinase 1 OS=Homo sapiens OX=9606 GN=SRPK1 PE=1 SV=2	Q96SB4-4; Q96SB4-3; Q96SB4	0	1769	45984	298188	133254	179432	41355.3	205189		135078		Peak Found	Peak Found	Peak Found	Peak Found	Peak Found	High	Not Found	Peak Found	High	3.781e-05	1.173e-05	3.74	71.3
[R].LLQQVSQIYQSIEFSR.[L]			4.27191e-08	9.16411e-05	1	2	8	Q14152	Q14152 [439-454]			Eukaryotic translation initiation factor 3 subunit A OS=Homo sapiens OX=9606 GN=EIF3A PE=1 SV=1	Q14152; Q14152-2	0	1939.03	335763		1.14624e+06		653487	68385.2	680172			High	Not Found	High	Not Found	High	Peak Found	High	Not Found	High	3.781e-05	1.464e-09	4.62	79.15
[R].LLQSGNSDVVR.[S]			0.000127926	9.16411e-05	1	2	1	Q13835	Q13835 [603-613]			Plakophilin-1 OS=Homo sapiens OX=9606 GN=PKP1 PE=1 SV=2	Q13835; Q13835-2	0	1187.64	374915									High	Not Found	Not Found	Not Found	Not Found	Not Found	Not Found	Not Found	High	3.781e-05	1.735e-05	2.83	40.37
[K].ILQMAEGIDIGEMPSYDLVLSKPSK.[G]			3.33368e-05	9.16411e-05	1	2	1	O15226	O15226 [4-28]			NF-kappa-B-repressing factor OS=Homo sapiens OX=9606 GN=NKRF PE=1 SV=2	O15226; O15226-2	0	2734.4									No Quan Values	Not Found	High	Not Found	Not Found	Not Found	Not Found	Not Found	Not Found	High	3.781e-05	3.6e-06	3.48
[R].LLQTAATAAQQGGQANHPTAAVVTEK.[Q]			5.18487e-07	9.16411e-05	1	3	7	P40763	P40763 [115-140]			Signal transducer and activator of transcription 3 OS=Homo sapiens OX=9606 GN=STAT3 PE=1 SV=2	P40763-2; P40763; P40763-3	0	2576.34		2571833	67362.1	1.05603e+06		592450				Not Found	High	Peak Found	High	Not Found	High	Not Found	High	High	3.781e-05	2.731e-08	5.42	45.54
[K].LLQVASPFLEPHLVR.[M]			6.83686e-06	9.16411e-05	1	2	3	O75694	O75694 [1052-1066]			Nuclear pore complex protein Nup155 OS=Homo sapiens OX=9606 GN=NUP155 PE=1 SV=1	O75694; O75694-2	0	1719			582995							Not Found	Not Found	High	Not Found	High	Not Found	High	Not Found	High	3.781e-05	5.591e-07	3.87	69.53
[K].LLQVGEEGPQAVAK.[L]			0.000135194	9.16411e-05	1	1	2	Q14674	Q14674 [300-313]			Separin OS=Homo sapiens OX=9606 GN=ESPL1 PE=1 SV=3	Q14674	0	1438.79					372909		57072.7			Not Found	Not Found	Not Found	Not Found	High	Not Found	High	Not Found	High	3.781e-05	1.838e-05	3.35	51.39
[R].LLRDYQELMNVK.[L]	1xOxidation [M9]	1xOxidation [M9]	0.000412005	9.16411e-05	2	4	7	P35908; P12035	P35908 [459-470]; P12035 [481-492]			Keratin, type II cytoskeletal 2 epidermal OS=Homo sapiens OX=9606 GN=KRT2 PE=1 SV=2 Keratin, type II cytoskeletal 3 OS=Homo sapiens OX=9606 GN=KRT3 PE=1 SV=3	Q5XKE5; P35908; Q01546; P12035	1	1537.8	534907		441545	2.15116e+07	887554		338194		Shared	High	Not Found	High	High	High	Not Found	High	Not Found	High	3.781e-05	6.8e-05	3.76	48.5
[K].IIRQEPSDSPMFIINR.[N]			3.42546e-07	9.16411e-05	1	1	2	Q02413	Q02413 [198-213]			Desmoglein-1 OS=Homo sapiens OX=9606 GN=DSG1 PE=1 SV=2	Q02413	1	1916.01	574524		93193	1.57109e+06						High	Not Found	Peak Found	High	Not Found	Not Found	Not Found	Not Found	High	3.781e-05	1.684e-08	5.15	59.29
[K].IIRQEPSDSPMFIINR.[N]	1xOxidation [M11]	1xOxidation [M11]	0.000386287	9.16411e-05	1	1	3	Q02413	Q02413 [198-213]			Desmoglein-1 OS=Homo sapiens OX=9606 GN=DSG1 PE=1 SV=2	Q02413	1	1932	161561			2.15042e+06	164726		72995.7			High	Not Found	Not Found	Peak Found	High	Not Found	High	Not Found	High	3.781e-05	6.307e-05	2.87	52.44
[K].IISAISELLER.[L]			3.01245e-05	9.16411e-05	1	1	3	Q9NU22	Q9NU22 [4574-4584]			Midasin OS=Homo sapiens OX=9606 GN=MDN1 PE=1 SV=2	Q9NU22	0	1243.73	74709		345290		96755.7					High	Not Found	High	Not Found	High	Not Found	Not Found	Not Found	High	3.781e-05	3.178e-06	3.03	75.93
[R].LLSASPVDAAIR.[V]			0.000141566	9.16411e-05	1	2	4	Q9NRG9	Q9NRG9 [259-270]			Aladin OS=Homo sapiens OX=9606 GN=AAAS PE=1 SV=1	Q9NRG9; Q9NRG9-2	0	1212.69						344744				Not Found	High	Not Found	Not Found	Not Found	High	Not Found	High	High	3.781e-05	1.948e-05	2.72	57.43
[K].YYVTIIDAPGHR.[D]			2.30627e-05	9.16411e-05	1	3	12	P68104	P68104 [85-96]			Elongation factor 1-alpha 1 OS=Homo sapiens OX=9606 GN=EEF1A1 PE=1 SV=1	P68104-2; P68104; Q5VTE0	0	1404.73	436059	2.51414e+06	1.36549e+06	2.15026e+06	705916	1.10739e+06		513703		High	High	High	High	High	High	High	High	High	3.781e-05	2.323e-06	2.53	52.98
[R].ILSDEDKPLFGPLPCR.[L]	1xCarbamidomethyl [C15]	1xCarbamidomethyl [C15]	0.000298493	9.16411e-05	1	2	3	Q8IWV8-4	Q8IWV8-4 [1346-1361]			Isoform 4 of E3 ubiquitin-protein ligase UBR2 OS=Homo sapiens OX=9606 GN=UBR2	Q8IWV8; Q8IWV8-4	0	1856.96	565354		1.65261e+06		610037					High	Not Found	High	Not Found	High	Not Found	Not Found	Not Found	High	3.781e-05	4.694e-05	3.86	63.57
[K].IIQTVGGGAVQER.[A]			3.39567e-05	9.16411e-05	1	3	4	Q2PPJ7	Q2PPJ7 [333-345]			Ral GTPase-activating protein subunit alpha-2 OS=Homo sapiens OX=9606 GN=RALGAPA2 PE=1 SV=2	Q2PPJ7; Q2PPJ7-3; Q2PPJ7-2	0	1327.73	232776	450134	414102	318304	184925	143453	114573	99067		High	Peak Found	High	Peak Found	High	Peak Found	High	Peak Found	High	3.781e-05	3.671e-06	2.75	42.92
[K].LISDYTVTEIPDTINDLQGSTK.[V]			0.000548097	9.16411e-05	1	2	4	O60318	O60318 [1528-1549]			Germinal-center associated nuclear protein OS=Homo sapiens OX=9606 GN=MCM3AP PE=1 SV=2	O60318-2; O60318	0	2423.22			138074		388770		79500.9			Not Found	Not Found	High	Not Found	High	Not Found	Peak Found	Not Found	High	3.781e-05	9.537e-05	3.89	79.49
[K].ILQLVATGAVR.[D]			0.000146878	9.16411e-05	1	2	4	P47897	P47897 [499-509]			Glutamine--tRNA ligase OS=Homo sapiens OX=9606 GN=QARS1 PE=1 SV=1	P47897-2; P47897	0	1140.71		20052470		12929187		7183184		6.92889e+06		Not Found	High	Not Found	High	Not Found	High	Not Found	High	High	3.781e-05	2.026e-05	3.02	59.1
[K].LIQIQDNGTGIR.[K]			8.60901e-05	9.16411e-05	1	1	4	P40692	P40692 [58-69]			DNA mismatch repair protein Mlh1 OS=Homo sapiens OX=9606 GN=MLH1 PE=1 SV=1	P40692	0	1327.73						377031		459231		Not Found	High	Not Found	High	Not Found	Peak Found	Not Found	High	High	3.781e-05	1.094e-05	2.44	52.43
[R].ILPHHQNTGGFFVAVLVK.[K]			1.44175e-05	9.16411e-05	1	3	5	Q08J23	Q08J23 [412-429]			RNA cytosine C(5)-methyltransferase NSUN2 OS=Homo sapiens OX=9606 GN=NSUN2 PE=1 SV=2	Q08J23-3; Q08J23; Q08J23-2	0	1977.11		5.17395e+06		3.43506e+06		705034		1200389		Not Found	High	Not Found	High	Not Found	Peak Found	Not Found	High	High	3.781e-05	1.343e-06	4.62	60.25
[K].LIPLLLSSLNDEVPEVR.[Q]			5.43058e-06	9.16411e-05	1	2	3	Q86Y56	Q86Y56 [286-302]			Dynein assembly factor 5, axonemal OS=Homo sapiens OX=9606 GN=DNAAF5 PE=1 SV=4	Q86Y56-2; Q86Y56	0	1907.08									No Quan Values	Not Found	Not Found	Not Found	High	Not Found	Not Found	Not Found	High	High	3.781e-05	4.289e-07	3.85
[K].LLPLVSDEVFIR.[D]			0.000130304	9.16411e-05	1	1	6	P11216	P11216 [522-533]			Glycogen phosphorylase, brain form OS=Homo sapiens OX=9606 GN=PYGB PE=1 SV=5	P11216	0	1400.81		3.71352e+06		2410288		1.04851e+06		1.43151e+06		Not Found	High	Not Found	High	Not Found	High	Not Found	High	High	3.781e-05	1.76e-05	2.93	80.64
[K].IIPLYSTLPPQQQQR.[I]			3.12402e-07	9.16411e-05	1	1	19	O43143	O43143 [385-399]			Pre-mRNA-splicing factor ATP-dependent RNA helicase DHX15 OS=Homo sapiens OX=9606 GN=DHX15 PE=1 SV=2	O43143	0	1781.99		12893403		13452014		7.19891e+06		4.3314e+06		Not Found	High	Not Found	High	Not Found	High	Not Found	High	High	3.781e-05	1.519e-08	2.69	63.91
[K].LIPNAIQICTESEK.[H]	1xCarbamidomethyl [C9]	1xCarbamidomethyl [C9]	0.000327286	9.16411e-05	1	3	1	Q96CP6	Q96CP6 [162-175]			Protein Aster-A OS=Homo sapiens OX=9606 GN=GRAMD1A PE=1 SV=2	Q96CP6; Q96CP6-3; Q96CP6-2	0	1615.84									No Quan Values	Not Found	Not Found	Not Found	Not Found	Not Found	High	Not Found	Not Found	High	3.781e-05	5.221e-05	2.59
[R].LLPQGTVIFEDISIEHFEGTVTK.[V]			1.53703e-07	9.16411e-05	1	4	9	O75534-2	O75534-2 [216-238]			Isoform 2 of Cold shock domain-containing protein E1 OS=Homo sapiens OX=9606 GN=CSDE1	O75534; O75534-4; O75534-3; O75534-2	0	2573.35		9.10906e+06		4.86651e+06		2.84772e+06		1.22279e+06		Not Found	High	Not Found	High	Not Found	High	Not Found	High	High	3.781e-05	6.549e-09	5.54	81.73
[R].LLPQGTVIFEDISIEHFEGTVTK.[V]	1xDeamidated [Q4]	1xDeamidated [Q4]	5.13733e-07	9.16411e-05	1	4	4	O75534-2	O75534-2 [216-238]			Isoform 2 of Cold shock domain-containing protein E1 OS=Homo sapiens OX=9606 GN=CSDE1	O75534; O75534-4; O75534-3; O75534-2	0	2574.33									No Quan Values	Not Found	High	Not Found	High	Not Found	Not Found	Not Found	Not Found	High	3.781e-05	2.708e-08	4.85
[R].LLPSAPQTLPDGPLASPAR.[V]			2.48205e-06	9.16411e-05	1	5	8	O15027	O15027 [1949-1967]			Protein transport protein Sec16A OS=Homo sapiens OX=9606 GN=SEC16A PE=1 SV=4	O15027-5; O15027-4; O15027; O15027-2; O15027-3	0	1901.05	805172		1.23842e+06				875940			High	Not Found	High	Not Found	High	Not Found	High	Not Found	High	3.781e-05	1.72e-07	3.5	67.75
[K].ILPTLEAVAALGNK.[V]			0.000504513	9.16411e-05	1	1	1	Q12905	Q12905 [128-141]			Interleukin enhancer-binding factor 2 OS=Homo sapiens OX=9606 GN=ILF2 PE=1 SV=2	Q12905	0	1409.84				207013						Not Found	Not Found	Not Found	High	Not Found	Not Found	Not Found	Not Found	High	3.781e-05	8.651e-05	2.41	75.21
[K].LIQIQDNGTGIR.[K]	1xDeamidated [N7]	1xDeamidated [N7]	0.000181533	9.16411e-05	1	1	2	P40692	P40692 [58-69]			DNA mismatch repair protein Mlh1 OS=Homo sapiens OX=9606 GN=MLH1 PE=1 SV=1	P40692	0	1328.72		1.11212e+06		530673		409439		463941		Not Found	High	Not Found	Peak Found	Not Found	High	Not Found	Peak Found	High	3.781e-05	2.611e-05	2.48	55.98
[R].ILPVAASYSAVTR.[F]			0.000165561	9.16411e-05	1	3	2	Q9BSJ2	Q9BSJ2 [263-275]			Gamma-tubulin complex component 2 OS=Homo sapiens OX=9606 GN=TUBGCP2 PE=1 SV=2	Q9BSJ2; Q9BSJ2-3; Q9BSJ2-4	0	1347.76				987027						Not Found	High	Not Found	High	Not Found	Not Found	Not Found	Not Found	High	3.781e-05	2.346e-05	2.46	58.8
[R].LLPVINTMLQLSPEEK.[G]	1xOxidation [M8]	1xOxidation [M8]	2.43674e-06	9.16411e-05	3	4	4	Q8IWJ2; Q99666; O14715	Q8IWJ2 [1638-1653]; Q99666 [1731-1746]; O14715 [1731-1746]			GRIP and coiled-coil domain-containing protein 2 OS=Homo sapiens OX=9606 GN=GCC2 PE=1 SV=4 RANBP2-like and GRIP domain-containing protein 5/6 OS=Homo sapiens OX=9606 GN=RGPD5 PE=1 SV=3 RANBP2-like and GRIP domain-containing protein 8 OS=Homo sapiens OX=9606 GN=RGPD8 PE=1 SV=2	Q8IWJ2; Q99666; O14715; Q7Z3J3	0	1841.01									No Quan Values	High	Not Found	High	Not Found	Not Found	Not Found	High	Not Found	High	3.781e-05	1.673e-07	3.71
[R].LIPYTSVEDFDWCTPPK.[K]	1xCarbamidomethyl [C13]	1xCarbamidomethyl [C13]	3.33368e-05	9.16411e-05	1	2	2	A6NHR9	A6NHR9 [480-496]			Structural maintenance of chromosomes flexible hinge domain-containing protein 1 OS=Homo sapiens OX=9606 GN=SMCHD1 PE=1 SV=2	A6NHR9-2; A6NHR9	0	2067.97		163729		216616	346386	81440	56748.3			Not Found	Peak Found	Not Found	Peak Found	High	Peak Found	Peak Found	Not Found	High	3.781e-05	3.58e-06	2.33	78.77
[K].LLQALAQYQNHLQEQPR.[K]			1.24418e-05	9.16411e-05	1	2	4	Q9BQG0	Q9BQG0 [162-178]			Myb-binding protein 1A OS=Homo sapiens OX=9606 GN=MYBBP1A PE=1 SV=2	Q9BQG0; Q9BQG0-2	0	2050.08	296208		502167		161635		57991.9			High	Not Found	High	Not Found	High	Not Found	High	Not Found	High	3.781e-05	1.132e-06	4.7	57.07
[R].ILQAVNFPFLVK.[L]			1.21027e-05	9.16411e-05	1	2	10	P17612	P17612 [95-106]			cAMP-dependent protein kinase catalytic subunit alpha OS=Homo sapiens OX=9606 GN=PRKACA PE=1 SV=2	P17612-2; P17612	0	1388.83			2.03912e+07	9.3931e+07	204241	686852		196802		Not Found	Not Found	High	High	High	High	Not Found	High	High	3.781e-05	1.093e-06	3.8	81.36
[K].LLQDFFNGR.[D]	1xDeamidated [N7]	1xDeamidated [N7]	0.000464394	9.16411e-05	1	2	8	P0DMV9	P0DMV9 [349-357]			Heat shock 70 kDa protein 1B OS=Homo sapiens OX=9606 GN=HSPA1B PE=1 SV=1	P0DMV8-2; P0DMV9	0	1110.56	169869	762554	1.05534e+06	2.64113e+06	281646	935789	95817.5	239768		High	High	High	High	High	High	High	High	High	3.781e-05	7.808e-05	2.02	71.33
[R].ILQEIESTDTACVGPTLR.[S]	1xCarbamidomethyl [C12]	1xCarbamidomethyl [C12]	3.21156e-07	9.16411e-05	1	1	2	Q8TAG9	Q8TAG9 [17-34]			Exocyst complex component 6 OS=Homo sapiens OX=9606 GN=EXOC6 PE=1 SV=3	Q8TAG9	0	2003.01									No Quan Values	Not Found	High	Not Found	Not Found	Not Found	Not Found	Not Found	Not Found	High	3.781e-05	1.564e-08	4.86
[K].LLQENVPSYEKDPGFEQFK.[M]			2.10231e-07	9.16411e-05	1	5	4	Q5H8A4	Q5H8A4 [361-379]			GPI ethanolamine phosphate transferase 2 OS=Homo sapiens OX=9606 GN=PIGG PE=1 SV=1	Q5H8A4-6; Q5H8A4-2; Q5H8A4-4; Q5H8A4-3; Q5H8A4	1	2268.12		850687		620250		356112				Not Found	High	Not Found	High	Not Found	High	Not Found	High	High	3.781e-05	9.549e-09	4.4	60.45
[K].LLQFHVATMVDNELPGLPR.[A]	1xOxidation [M9]	1xOxidation [M9]	1.74944e-05	9.16411e-05	1	2	1	P24928	P24928 [309-327]			DNA-directed RNA polymerase II subunit RPB1 OS=Homo sapiens OX=9606 GN=POLR2A PE=1 SV=2	P24928; P24928-2	0	2166.14					319499		121562			Not Found	Not Found	Not Found	Not Found	High	Not Found	Peak Found	Not Found	High	3.781e-05	1.678e-06	4.51	71.27
[K].ILQIEDSEMSR.[V]	1xOxidation [M9]	1xOxidation [M9]	0.000573916	9.16411e-05	1	4	2	Q96Q89-3	Q96Q89-3 [359-369]			Isoform 3 of Kinesin-like protein KIF20B OS=Homo sapiens OX=9606 GN=KIF20B	Q96Q89-4; Q96Q89-3; Q96Q89; Q96Q89-2	0	1336.64					284971					Not Found	Not Found	Not Found	Not Found	High	Not Found	High	Not Found	High	3.781e-05	0.0001005	2.09	47.54
[K].ILPVLCGLTVDPEK.[S]	1xCarbamidomethyl [C6]	1xCarbamidomethyl [C6]	0.000102555	9.16411e-05	1	6	2	Q96KG9	Q96KG9 [507-520]			N-terminal kinase-like protein OS=Homo sapiens OX=9606 GN=SCYL1 PE=1 SV=1	Q96KG9; Q96KG9-3; Q96KG9-5; Q96KG9-6; Q96KG9-4; Q96KG9-2	0	1553.86				306770		121480		101212		Not Found	Not Found	Not Found	High	Not Found	High	Not Found	Peak Found	High	3.781e-05	1.34e-05	2.61	77.36
[R].LLPGLEADSKPGR.[R]			5.95585e-05	9.16411e-05	1	2	9	Q86Y56	Q86Y56 [34-46]			Dynein assembly factor 5, axonemal OS=Homo sapiens OX=9606 GN=DNAAF5 PE=1 SV=4	Q86Y56-2; Q86Y56	0	1352.75		9456775		5.50508e+06		2.83568e+06		5434398		Not Found	High	Not Found	High	Not Found	High	Not Found	High	High	3.781e-05	7.054e-06	2.29	45.62
[R].LISELSLLNHK.[L]			0.000513889	9.16411e-05	1	3	4	Q9UBF8	Q9UBF8 [352-362]			Phosphatidylinositol 4-kinase beta OS=Homo sapiens OX=9606 GN=PI4KB PE=1 SV=1	Q9UBF8-2; Q9UBF8-3; Q9UBF8	0	1266.74		1.0938e+06				615190		651804		Not Found	High	Not Found	High	Not Found	High	Not Found	High	High	3.781e-05	8.82e-05	2.73	57.88
[K].IISESAQMNEFETLTAK.[F]	1xOxidation [M8]	1xOxidation [M8]	2.00768e-07	9.16411e-05	1	6	5	Q7Z4S6	Q7Z4S6 [253-269]			Kinesin-like protein KIF21A OS=Homo sapiens OX=9606 GN=KIF21A PE=1 SV=2	Q7Z4S6; Q7Z4S6-5; Q7Z4S6-3; Q7Z4S6-2; Q7Z4S6-6; Q7Z4S6-4	0	1927.93	353186		395051		229309		122594			High	Not Found	High	Not Found	High	Not Found	High	Not Found	High	3.781e-05	8.976e-09	3.5	60.43
[K].LLSYSPESLQYMVK.[I]			3.39567e-05	9.16411e-05	1	5	2	Q6YHU6	Q6YHU6 [553-566]			Thyroid adenoma-associated protein OS=Homo sapiens OX=9606 GN=THADA PE=1 SV=1	Q6YHU6-2; Q6YHU6-5; Q6YHU6-3; Q6YHU6; Q6YHU6-6	0	1657.85	676864		234282							High	Not Found	High	Not Found	Not Found	Not Found	Not Found	Not Found	High	3.781e-05	3.648e-06	3.56	71.26
[K].LLSYSPESLQYMVK.[I]	1xOxidation [M12]	1xOxidation [M12]	0.000301254	9.16411e-05	1	5	4	Q6YHU6	Q6YHU6 [553-566]			Thyroid adenoma-associated protein OS=Homo sapiens OX=9606 GN=THADA PE=1 SV=1	Q6YHU6-2; Q6YHU6-5; Q6YHU6-3; Q6YHU6; Q6YHU6-6	0	1673.85	535011									High	Not Found	High	Not Found	High	Not Found	Not Found	Not Found	High	3.781e-05	4.709e-05	2.89	64.17
[R].LLTAGTIEEK.[I]			0.000584581	9.16411e-05	1	1	3	Q03468	Q03468 [962-971]			DNA excision repair protein ERCC-6 OS=Homo sapiens OX=9606 GN=ERCC6 PE=1 SV=1	Q03468	0	1074.6	282029		382696		193686					High	Not Found	High	Not Found	High	Not Found	Not Found	Not Found	High	3.781e-05	0.0001027	2.23	46.05
[R].LLTATNLVTLPNSR.[G]			6.7756e-05	9.16411e-05	1	2	4	O95071	O95071 [1258-1271]			E3 ubiquitin-protein ligase UBR5 OS=Homo sapiens OX=9606 GN=UBR5 PE=1 SV=2	O95071-2; O95071	0	1512.87									No Quan Values	High	Not Found	High	Not Found	High	Not Found	High	Not Found	High	3.781e-05	8.255e-06	3.31
[K].ILTATVDNANILLQIDNAR.[L]			5.37815e-08	9.16411e-05	1	1	12	Q04695	Q04695 [145-163]			Keratin, type I cytoskeletal 17 OS=Homo sapiens OX=9606 GN=KRT17 PE=1 SV=2	Q04695	0	2068.14		231356		94983.4	174971	679372	265200	95823.3		High	High	High	High	High	High	High	High	High	3.781e-05	1.928e-09	5.06	79.6
[K].ILTATVDNANVLLQIDNAR.[L]			1.84613e-11	9.16411e-05	1	1	20	P02533	P02533 [176-194]			Keratin, type I cytoskeletal 14 OS=Homo sapiens OX=9606 GN=KRT14 PE=1 SV=4	P02533	0	2054.12	1.02176e+06	1.86549e+06	2.39668e+06	3731215	2.49712e+06	1.83064e+06	2.70138e+06	1.40298e+06		High	High	High	High	High	High	High	High	High	3.781e-05	1.695e-13	5.65	76.75
[K].LLTDCNTETFQK.[I]	1xCarbamidomethyl [C5]	1xCarbamidomethyl [C5]	1.06384e-05	9.16411e-05	1	1	3	Q5VIR6-4	Q5VIR6-4 [760-771]			Isoform 4 of Vacuolar protein sorting-associated protein 53 homolog OS=Homo sapiens OX=9606 GN=VPS53	Q5VIR6-4	0	1469.69				566305		208438		280766		Not Found	High	Not Found	High	Not Found	Peak Found	Not Found	High	High	3.781e-05	9.369e-07	2.94	49.47
[K].ILTDEAVSGWK.[F]			6.5305e-05	9.16411e-05	1	2	2	Q93008-1	Q93008-1 [131-141]			Isoform 2 of Probable ubiquitin carboxyl-terminal hydrolase FAF-X OS=Homo sapiens OX=9606 GN=USP9X	Q93008-1; Q93008	0	1218.64	226651		319625							High	Not Found	High	Not Found	Not Found	Not Found	Not Found	Not Found	High	3.781e-05	7.843e-06	2.56	58.43
[K].LLTDGYACEVR.[C]	1xCarbamidomethyl [C8]	1xCarbamidomethyl [C8]	0.000214265	9.16411e-05	1	2	8	O15226	O15226 [235-245]			NF-kappa-B-repressing factor OS=Homo sapiens OX=9606 GN=NKRF PE=1 SV=2	O15226; O15226-2	0	1296.63		2253220		1.68994e+06		567833		1.39258e+06		Not Found	High	Not Found	High	Not Found	High	Not Found	High	High	3.781e-05	3.173e-05	2.87	53.28
[K].LLSYASYCIEHGDLELAAK.[F]	1xCarbamidomethyl [C8]	1xCarbamidomethyl [C8]	1.0064e-06	9.16411e-05	2	4	5	Q16891-4; Q16891-2	Q16891-4 [689-707]; Q16891-2 [679-697]			Isoform 4 of MICOS complex subunit MIC60 OS=Homo sapiens OX=9606 GN=IMMT Isoform 2 of MICOS complex subunit MIC60 OS=Homo sapiens OX=9606 GN=IMMT	Q16891-4; Q16891-2; Q16891-3; Q16891	0	2153.06		1.97751e+06				1.02272e+06		659962	Shared	Not Found	High	Not Found	High	Not Found	High	Not Found	High	High	3.781e-05	5.928e-08	3.52	65.78
[K].ILTDVLFCYAR.[E]	1xCarbamidomethyl [C8]	1xCarbamidomethyl [C8]	8.85021e-05	9.16411e-05	1	2	2	Q92609	Q92609 [185-195]			TBC1 domain family member 5 OS=Homo sapiens OX=9606 GN=TBC1D5 PE=1 SV=1	Q92609-2; Q92609	0	1370.71	24951	411090	32232.3	225961			39777.7	132343		Peak Found	High	Peak Found	Peak Found	Not Found	Not Found	Peak Found	High	High	3.781e-05	1.118e-05	2.55	78.82
[R].LLTGVEYVVGR.[K]			8.76907e-05	9.16411e-05	1	1	5	O60934	O60934 [18-28]			Nibrin OS=Homo sapiens OX=9606 GN=NBN PE=1 SV=1	O60934	0	1205.69	193616	4.71681e+06	398685	2365549		1.05817e+06		2.02912e+06		Peak Found	High	Peak Found	High	Not Found	High	Not Found	High	High	3.781e-05	1.117e-05	3.13	63.73
[K].LITKPSEGTTLR.[V]			7.85147e-05	9.16411e-05	1	3	1	P49959	P49959 [417-428]			Double-strand break repair protein MRE11 OS=Homo sapiens OX=9606 GN=MRE11 PE=1 SV=3	P49959-2; P49959; P49959-3	0	1315.76						587435				Not Found	Not Found	Not Found	Not Found	Not Found	High	Not Found	Not Found	High	3.781e-05	9.796e-06	2.55	36.33
[K].LLTLFNPDLANNYK.[R]			2.93035e-05	9.16411e-05	1	3	2	Q9Y4B6	Q9Y4B6 [1211-1224]			DDB1- and CUL4-associated factor 1 OS=Homo sapiens OX=9606 GN=DCAF1 PE=1 SV=3	Q9Y4B6; Q9Y4B6-3; Q9Y4B6-2	0	1635.87			852232		306077	69929.2	31400			Not Found	Not Found	High	Not Found	Peak Found	Peak Found	Peak Found	Not Found	High	3.781e-05	3.087e-06	3.66	75.96
[K].LLTLGLSLLHADVVPNATIR.[N]			6.52912e-06	9.16411e-05	1	6	3	P42356	P42356 [1352-1371]			Phosphatidylinositol 4-kinase alpha OS=Homo sapiens OX=9606 GN=PI4KA PE=1 SV=4	A4QPH2-4; A4QPH2-2; P42356-2; P42356; A4QPH2; Q8N8J0	0	2116.25			127276		403578		285003			Not Found	Not Found	High	Not Found	High	Not Found	High	Not Found	High	3.781e-05	5.289e-07	4.42	81.15
[R].IITITGTQDQIQNAQYLLQNSVK.[Q]			2.12228e-06	9.16411e-05	1	3	7	P61978	P61978 [434-456]			Heterogeneous nuclear ribonucleoprotein K OS=Homo sapiens OX=9606 GN=HNRNPK PE=1 SV=1	P61978-2; P61978; P61978-3	0	2589.39	205354		971910	648528	350219	323442		200232		High	Not Found	High	High	High	High	High	High	High	3.781e-05	1.425e-07	4.18	80.07
[R].ILTNFTGVMPPQFK.[K]			7.84988e-06	9.16411e-05	1	2	1	A5YKK6	A5YKK6 [2164-2177]			CCR4-NOT transcription complex subunit 1 OS=Homo sapiens OX=9606 GN=CNOT1 PE=1 SV=2	A5YKK6-2; A5YKK6	0	1592.85					294998					Not Found	Not Found	Not Found	Not Found	High	Not Found	Not Found	Not Found	High	3.781e-05	6.621e-07	3.11	74.44
[R].ILTNFTGVMPPQFK.[K]	1xOxidation [M9]	1xOxidation [M9]	5.95585e-05	9.16411e-05	1	2	2	A5YKK6	A5YKK6 [2164-2177]			CCR4-NOT transcription complex subunit 1 OS=Homo sapiens OX=9606 GN=CNOT1 PE=1 SV=2	A5YKK6-2; A5YKK6	0	1608.85	90687.7		98164		657993		112040			Peak Found	Not Found	Peak Found	Not Found	High	Not Found	High	Not Found	High	3.781e-05	7.084e-06	3.13	69.28
[R].LITPLAFALTSDNR.[E]			4.90838e-05	9.16411e-05	1	2	6	Q8TCG1	Q8TCG1 [509-522]			Protein CIP2A OS=Homo sapiens OX=9606 GN=CIP2A PE=1 SV=2	Q8TCG1-2; Q8TCG1	0	1531.85		2.66738e+06		690676				293988		Not Found	High	Not Found	High	Not Found	High	Not Found	High	High	3.781e-05	5.634e-06	4.01	81.08
[R].LLTQFPNAEK.[M]			0.000481815	9.16411e-05	2	2	4	Q9H7D0; Q14185	Q9H7D0 [1398-1407]; Q14185 [1374-1383]			Dedicator of cytokinesis protein 5 OS=Homo sapiens OX=9606 GN=DOCK5 PE=1 SV=3 Dedicator of cytokinesis protein 1 OS=Homo sapiens OX=9606 GN=DOCK1 PE=1 SV=2	Q9H7D0; Q14185	0	1160.63	1.77372e+06		1.94071e+06		991959		672501		Shared	High	Not Found	High	Not Found	High	Not Found	High	Not Found	High	3.781e-05	8.224e-05	2.25	51.18
[K].LITGIIYPQNK.[D]			6.8383e-05	9.16411e-05	1	1	4	Q9Y6W3	Q9Y6W3 [310-320]			Calpain-7 OS=Homo sapiens OX=9606 GN=CAPN7 PE=1 SV=1	Q9Y6W3	0	1259.74		916700		486907		322161		512564		Not Found	High	Not Found	High	Not Found	High	Not Found	High	High	3.781e-05	8.321e-06	2.97	59.78
[K].IISESAQMNEFETLTAK.[F]			0.000285061	9.16411e-05	1	6	1	Q7Z4S6	Q7Z4S6 [253-269]			Kinesin-like protein KIF21A OS=Homo sapiens OX=9606 GN=KIF21A PE=1 SV=2	Q7Z4S6; Q7Z4S6-5; Q7Z4S6-3; Q7Z4S6-2; Q7Z4S6-6; Q7Z4S6-4	0	1911.94	208694		144974		67929.7					High	Not Found	Peak Found	Not Found	Peak Found	Not Found	Not Found	Not Found	High	3.781e-05	4.432e-05	2.51	67.27
[K].LISWYDNEFGYSNR.[V]			8.93036e-06	9.16411e-05	1	2	7	P04406	P04406 [310-323]			Glyceraldehyde-3-phosphate dehydrogenase OS=Homo sapiens OX=9606 GN=GAPDH PE=1 SV=3	P04406-2; P04406	0	1763.8	486100	529064	178355	2.25197e+06	246421	402809	185970	250393		High	High	High	High	High	High	Peak Found	High	High	3.781e-05	7.683e-07	3.32	72.52
[K].IISVFVDALPHVPEHR.[R]			4.95149e-07	9.16411e-05	1	1	2	Q9H583	Q9H583 [1379-1394]			HEAT repeat-containing protein 1 OS=Homo sapiens OX=9606 GN=HEATR1 PE=1 SV=3	Q9H583	0	1829.01					841375		88636.1			Not Found	Not Found	Not Found	Not Found	High	Not Found	Peak Found	Not Found	High	3.781e-05	2.578e-08	3.39	65.56
[K].LISGDAEPTPEQEEK.[A]			2.34915e-05	9.16411e-05	1	2	2	O75592	O75592 [3913-3927]			E3 ubiquitin-protein ligase MYCBP2 OS=Homo sapiens OX=9606 GN=MYCBP2 PE=1 SV=4	O75592; O75592-2	0	1642.78			298135		183032					Not Found	Not Found	High	Not Found	High	Not Found	Not Found	Not Found	High	3.781e-05	2.373e-06	2.89	42.68
[R].IISGHIDLDNR.[G]			0.000101615	9.16411e-05	1	3	9	O94874	O94874 [164-174]			E3 UFM1-protein ligase 1 OS=Homo sapiens OX=9606 GN=UFL1 PE=1 SV=2	O94874; O94874-3; O94874-2	0	1252.66		5.99516e+06		5.55517e+06		2.6194e+06		4.81619e+06		Not Found	High	Not Found	High	Not Found	High	Not Found	High	High	3.781e-05	1.318e-05	3.32	44.37
[R].LLSGPLDQVR.[A]			0.000464394	9.16411e-05	1	1	4	Q9H3S7	Q9H3S7 [528-537]			Tyrosine-protein phosphatase non-receptor type 23 OS=Homo sapiens OX=9606 GN=PTPN23 PE=1 SV=1	Q9H3S7	0	1097.63	2.51093e+06		3.62728e+06		1.75707e+06		1.09552e+06			High	Not Found	High	Not Found	High	Not Found	High	Not Found	High	3.781e-05	7.832e-05	2.72	56.03
[R].LISGVVQSYVELGLNEDDAFAK.[G]			0.000355565	9.16411e-05	1	1	1	Q13616	Q13616 [200-221]			Cullin-1 OS=Homo sapiens OX=9606 GN=CUL1 PE=1 SV=2	Q13616	0	2367.21									No Quan Values	Not Found	Not Found	Not Found	Not Found	Not Found	Not Found	Not Found	High	High	3.781e-05	5.709e-05	3.13
[R].LLSHSSVAVDAAPPNQGGLATCSDVR.[H]	1xCarbamidomethyl [C22]	1xCarbamidomethyl [C22]	3.79253e-05	9.16411e-05	1	2	5	Q9C0D5	Q9C0D5 [1630-1655]			Protein TANC1 OS=Homo sapiens OX=9606 GN=TANC1 PE=1 SV=3	Q9C0D5-2; Q9C0D5	0	2622.29	252093				140350					High	Not Found	High	Not Found	High	Not Found	High	Not Found	High	3.781e-05	4.159e-06	4	52.58
[R].LLSLGAQANFFHPEK.[G]			3.4588e-05	9.16411e-05	2	13	5	Q9Y2X7; Q14161	Q9Y2X7 [152-166]; Q14161 [152-166]			ARF GTPase-activating protein GIT1 OS=Homo sapiens OX=9606 GN=GIT1 PE=1 SV=2 ARF GTPase-activating protein GIT2 OS=Homo sapiens OX=9606 GN=GIT2 PE=1 SV=2	Q14161-10; Q14161-11; Q9Y2X7; Q14161-4; Q14161-5; Q14161-7; Q14161-8; Q14161-9; Q14161-6; Q14161; Q9Y2X7-3; Q14161-3; Q14161-2	0	1671.89		1.73323e+06		1.18359e+06		932680		1.04403e+06	Shared	Not Found	High	Not Found	High	Not Found	High	Not Found	High	High	3.781e-05	3.74e-06	4.24	63.91
[R].LLSLISIALPENK.[V]			5.74041e-05	9.16411e-05	1	3	4	Q7Z6Z7	Q7Z6Z7 [3456-3468]			E3 ubiquitin-protein ligase HUWE1 OS=Homo sapiens OX=9606 GN=HUWE1 PE=1 SV=3	Q7Z6Z7-2; Q7Z6Z7; Q7Z6Z7-3	0	1410.86	106918		220579		90408.5		150508			High	Not Found	High	Not Found	High	Not Found	High	Not Found	High	3.781e-05	6.747e-06	3.11	82.36
[R].LISLTDENALSGNEELTVK.[I]			1.40108e-09	9.16411e-05	1	1	3	P14625	P14625 [117-135]			Endoplasmin OS=Homo sapiens OX=9606 GN=HSP90B1 PE=1 SV=1	P14625	0	2046.06				1.79294e+06						Not Found	High	Not Found	High	Not Found	Not Found	Not Found	Not Found	High	3.781e-05	2.695e-11	5.45	70.79
[K].LLSMAYSAVGK.[L]			0.000298493	9.16411e-05	1	1	4	Q5VYK3	Q5VYK3 [415-425]			Proteasome adapter and scaffold protein ECM29 OS=Homo sapiens OX=9606 GN=ECPAS PE=1 SV=2	Q5VYK3	0	1139.61	1.50545e+06		1.48094e+06		833051		237895			High	Not Found	High	Not Found	High	Not Found	High	Not Found	High	3.781e-05	4.69e-05	2.28	56.17
[R].LLSVVLPNIK.[S]			0.000584581	9.16411e-05	1	1	4	Q8IWV7	Q8IWV7 [1381-1390]			E3 ubiquitin-protein ligase UBR1 OS=Homo sapiens OX=9606 GN=UBR1 PE=1 SV=1	Q8IWV7	0	1095.71	704717		1.1693e+06		537672		749903			High	Not Found	High	Not Found	High	Not Found	High	Not Found	High	3.781e-05	0.0001024	2.63	70.33
[K].LLSMAYSAVGK.[L]	1xOxidation [M4]	1xOxidation [M4]	3.86305e-05	9.16411e-05	1	1	5	Q5VYK3	Q5VYK3 [415-425]			Proteasome adapter and scaffold protein ECM29 OS=Homo sapiens OX=9606 GN=ECPAS PE=1 SV=2	Q5VYK3	0	1155.61	2317999		3.34539e+06	1.35029e+06	1.71986e+06		914009	225029		High	Not Found	High	Peak Found	High	Not Found	High	Peak Found	High	3.781e-05	4.238e-06	2.6	47.4
[K].LLSPLQDVDIK.[I]			0.000327286	9.16411e-05	1	2	1	Q9UGL1	Q9UGL1 [1167-1177]			Lysine-specific demethylase 5B OS=Homo sapiens OX=9606 GN=KDM5B PE=1 SV=3	Q9UGL1; Q9UGL1-2	0	1240.71			443752							Not Found	Not Found	High	Not Found	Not Found	Not Found	Not Found	Not Found	High	3.781e-05	5.214e-05	2.37	67.43
[K].LLSPSILKPFPLWTGK.[Q]			2.0445e-08	9.16411e-05	1	1	9	O95602	O95602 [670-685]			DNA-directed RNA polymerase I subunit RPA1 OS=Homo sapiens OX=9606 GN=POLR1A PE=1 SV=2	O95602	0	1797.07	1.70184e+06		3.34101e+06		1.14903e+06		1.32233e+06			High	Not Found	High	Not Found	High	Not Found	High	Not Found	High	3.781e-05	6.21e-10	4.96	78.78
[K].LLSPVVPQISAPQSNK.[E]			3.24207e-06	9.16411e-05	1	2	9	Q8N1F7	Q8N1F7 [645-660]			Nuclear pore complex protein Nup93 OS=Homo sapiens OX=9606 GN=NUP93 PE=1 SV=2	Q8N1F7-2; Q8N1F7	0	1677.95		3.55014e+07		27054870		14666419		1.82643e+07		Not Found	High	Not Found	High	Not Found	High	Not Found	High	High	3.781e-05	2.347e-07	3.91	64.34
[R].LISQIVSSITASLR.[F]			4.99853e-06	9.16411e-05	1	8	10	P68363	P68363 [230-243]			Tubulin alpha-1B chain OS=Homo sapiens OX=9606 GN=TUBA1B PE=1 SV=1	Q9NY65; P68366-2; P68363; Q9BQE3; P68363-2; Q9H853; Q9NY65-2; P68366	0	1487.88	272013	930869	705931	1.26125e+06	206319	411645		312018		High	High	High	High	High	High	Not Found	Peak Found	High	3.781e-05	3.892e-07	3.71	85.18
[R].LLSQPCASDR.[F]	1xCarbamidomethyl [C6]	1xCarbamidomethyl [C6]	0.000579224	9.16411e-05	1	3	4	A3KMH1	A3KMH1 [411-420]			von Willebrand factor A domain-containing protein 8 OS=Homo sapiens OX=9606 GN=VWA8 PE=1 SV=2	A3KMH1; A3KMH1-3; A3KMH1-2	0	1146.56	388049		643842				251162			High	Not Found	High	Not Found	High	Not Found	High	Not Found	High	3.781e-05	0.0001016	2.19	37.1
[K].LLSQQELVPELENTIK.[N]			0.000150993	9.16411e-05	1	1	3	Q8IWJ2	Q8IWJ2 [547-562]			GRIP and coiled-coil domain-containing protein 2 OS=Homo sapiens OX=9606 GN=GCC2 PE=1 SV=4	Q8IWJ2	0	1854.02	95933.2		366165							Peak Found	Not Found	High	Not Found	Not Found	Not Found	High	Not Found	High	3.781e-05	2.106e-05	3.11	74.76
[K].IISSDRDLLAVVFYGTEK.[D]			0.000124439	9.16411e-05	1	1	4	P12956	P12956 [75-92]			X-ray repair cross-complementing protein 6 OS=Homo sapiens OX=9606 GN=XRCC6 PE=1 SV=2	P12956	1	2026.09	34274.1	409973	146216			115409		93294		Peak Found	High	High	High	Not Found	High	Not Found	Peak Found	High	3.781e-05	1.672e-05	3.45	79.39
[K].IISSNQELIYEGR.[R]			1.7652e-06	9.16411e-05	1	1	4	Q9UHD2	Q9UHD2 [345-357]			Serine/threonine-protein kinase TBK1 OS=Homo sapiens OX=9606 GN=TBK1 PE=1 SV=1	Q9UHD2	0	1521.79		1.45705e+06				455856		369030		Not Found	High	Not Found	Not Found	Not Found	High	Not Found	High	High	3.781e-05	1.144e-07	3.34	54.25
[R].LISSPTSFIDVGAR.[L]			7.77949e-05	9.16411e-05	1	1	3	Q86WG5	Q86WG5 [1276-1289]			Myotubularin-related protein 13 OS=Homo sapiens OX=9606 GN=SBF2 PE=1 SV=1	Q86WG5	0	1462.79	336924		465033		268761		139460			High	Not Found	High	Not Found	Peak Found	Not Found	High	Not Found	High	3.781e-05	9.648e-06	2.43	69.18
[K].LISNPTNFNHIAHMGPGDGIQILK.[D]	1xOxidation [M14]	1xOxidation [M14]	0.000533167	9.16411e-05	2	6	1	Q5VT25-3; Q5VT25-6	Q5VT25-3 [1476-1499]; Q5VT25-6 [1557-1580]			Isoform 3 of Serine/threonine-protein kinase MRCK alpha OS=Homo sapiens OX=9606 GN=CDC42BPA Isoform 6 of Serine/threonine-protein kinase MRCK alpha OS=Homo sapiens OX=9606 GN=CDC42BPA	Q5VT25-5; Q5VT25; Q5VT25-4; Q5VT25-3; Q5VT25-6; Q5VT25-2	0	2603.34	463148		536846		221449				Shared	Peak Found	Not Found	High	Not Found	Peak Found	Not Found	Not Found	Not Found	High	3.781e-05	9.238e-05	2.91	59.48
[R].LLTSCYVGPTR.[Q]	1xCarbamidomethyl [C5]	1xCarbamidomethyl [C5]	0.000123299	9.16411e-05	1	5	3	Q562E7	Q562E7 [1252-1262]			WD repeat-containing protein 81 OS=Homo sapiens OX=9606 GN=WDR81 PE=1 SV=2	Q562E7-6; Q562E7-4; Q562E7-3; Q562E7; Q562E7-5	0	1266.65	217130				242543					Peak Found	Not Found	Not Found	Not Found	High	Not Found	High	Not Found	High	3.781e-05	1.664e-05	2.38	50
[R].LLPGEECVLDGLR.[V]	1xCarbamidomethyl [C7]	1xCarbamidomethyl [C7]	8.22152e-05	9.16411e-05	1	3	4	O95248-4	O95248-4 [890-902]			Isoform 4 of Myotubularin-related protein 5 OS=Homo sapiens OX=9606 GN=SBF1	O95248-5; O95248; O95248-4	0	1470.76	532922		315874		455869		378881			High	Not Found	High	Not Found	High	Not Found	High	Not Found	High	3.781e-05	1.028e-05	2.55	71.16
[R].LLPDTINSINLDR.[I]	1xDeamidated [N7]	1xDeamidated [N7]	0.000137708	9.16411e-05	1	3	1	Q14008	Q14008 [1719-1731]			Cytoskeleton-associated protein 5 OS=Homo sapiens OX=9606 GN=CKAP5 PE=1 SV=3	Q14008-2; Q14008; Q14008-3	0	1484.8					308997					Not Found	Not Found	Not Found	Not Found	High	Not Found	Not Found	Not Found	High	3.781e-05	1.877e-05	2.33	71.16
[K].IILDLISESPIK.[G]			5.28257e-06	9.16411e-05	1	3	7	P61978	P61978 [208-219]			Heterogeneous nuclear ribonucleoprotein K OS=Homo sapiens OX=9606 GN=HNRNPK PE=1 SV=1	P61978-2; P61978; P61978-3	0	1340.8	277411	462840	1.00398e+06	765973	478185	301449	128054	298945		High	High	High	High	High	High	Peak Found	High	High	3.781e-05	4.135e-07	3.56	80.05
[R].LLLDIPLQTPHK.[L]			5.0926e-05	9.16411e-05	3	6	8	P49792; Q99666; O14715	P49792 [2145-2156]; Q99666 [1169-1180]; O14715 [1169-1180]			E3 SUMO-protein ligase RanBP2 OS=Homo sapiens OX=9606 GN=RANBP2 PE=1 SV=2 RANBP2-like and GRIP domain-containing protein 5/6 OS=Homo sapiens OX=9606 GN=RGPD5 PE=1 SV=3 RANBP2-like and GRIP domain-containing protein 8 OS=Homo sapiens OX=9606 GN=RGPD8 PE=1 SV=2	P0DJD0; P49792; Q99666; P0DJD1; O14715; A6NKT7	0	1387.83	566687		2.04233e+06		1.05765e+06	59479.9	585969		Shared	High	Not Found	High	Not Found	High	Peak Found	High	Not Found	High	3.781e-05	5.898e-06	3.23	65.71
[K].ILLDPNSEEVSEK.[D]			0.000224362	9.16411e-05	1	2	2	P51531	P51531 [660-672]			Probable global transcription activator SNF2L2 OS=Homo sapiens OX=9606 GN=SMARCA2 PE=1 SV=2	P51531-2; P51531	0	1472.75	263459		404118		128248		99081.7			High	Not Found	High	Not Found	Peak Found	Not Found	Peak Found	Not Found	High	3.781e-05	3.348e-05	2.59	55.06
[K].ILLDPNSEEVSEKDAK.[Q]			1.86595e-05	9.16411e-05	1	2	3	P51531	P51531 [660-675]			Probable global transcription activator SNF2L2 OS=Homo sapiens OX=9606 GN=SMARCA2 PE=1 SV=2	P51531-2; P51531	1	1786.91	187625		345000				329860			High	Not Found	High	Not Found	Not Found	Not Found	High	Not Found	High	3.781e-05	1.816e-06	3.99	48.04
[K].IILEAALQAAK.[S]			6.59093e-05	9.16411e-05	1	3	2	Q08378	Q08378 [776-786]			Golgin subfamily A member 3 OS=Homo sapiens OX=9606 GN=GOLGA3 PE=1 SV=2	Q08378-2; Q08378-4; Q08378	0	1140.7			953526		371762					Not Found	Not Found	High	Not Found	High	Not Found	Not Found	Not Found	High	3.781e-05	7.953e-06	2.83	63.73
[R].ILLEAAPLPDFPALVLGESIAANNAYR.[Q]			3.62182e-05	9.16411e-05	1	2	2	Q8TCG1	Q8TCG1 [531-557]			Protein CIP2A OS=Homo sapiens OX=9606 GN=CIP2A PE=1 SV=2	Q8TCG1-2; Q8TCG1	0	2838.54									No Quan Values	Not Found	High	Not Found	Not Found	Not Found	High	Not Found	Not Found	High	3.781e-05	3.95e-06	5.27
[K].IIIEPGFLFTTAKPK.[E]			2.90348e-05	9.16411e-05	1	3	2	O94964-2	O94964-2 [1274-1288]			Isoform 2 of Protein SOGA1 OS=Homo sapiens OX=9606 GN=SOGA1	O94964-2; O94964; O94964-3	0	1674.98									No Quan Values	Not Found	Not Found	High	Not Found	Not Found	Not Found	High	Not Found	High	3.781e-05	3.037e-06	3.07
[R].LLLFSSATDAAIR.[V]			0.000186619	9.16411e-05	1	1	6	Q12788	Q12788 [166-178]			Transducin beta-like protein 3 OS=Homo sapiens OX=9606 GN=TBL3 PE=1 SV=2	Q12788	0	1377.77						1.20116e+06				Not Found	High	Not Found	High	Not Found	High	Not Found	Not Found	High	3.781e-05	2.705e-05	3.36	71.89
[R].LLLGLTSADGK.[S]			7.49808e-05	9.16411e-05	1	2	4	Q7Z401	Q7Z401 [290-300]			C-myc promoter-binding protein OS=Homo sapiens OX=9606 GN=DENND4A PE=1 SV=2	Q7Z401; Q7Z401-2	0	1087.64	373947		198984		457670		468201			High	Not Found	High	Not Found	High	Not Found	High	Not Found	High	3.781e-05	9.288e-06	2.97	61.6
[K].ILLDLEQALSSEGTQENK.[V]			1.63899e-08	9.16411e-05	1	2	9	Q14999	Q14999 [634-651]			Cullin-7 OS=Homo sapiens OX=9606 GN=CUL7 PE=1 SV=2	Q14999; Q14999-2	0	1988.02	303218		596481		243628		269358			High	Not Found	High	Not Found	High	Not Found	High	Not Found	High	3.781e-05	4.771e-10	4.7	77.31
[K].ILLGSEQGSLQLWNVK.[S]			2.77146e-07	9.16411e-05	1	1	6	Q8NI36	Q8NI36 [220-235]			WD repeat-containing protein 36 OS=Homo sapiens OX=9606 GN=WDR36 PE=1 SV=1	Q8NI36	0	1784.99				400802		147690		243195		Not Found	High	Not Found	High	Not Found	High	Not Found	High	High	3.781e-05	1.317e-08	3.88	76.25
[R].LLIHQSLAGGIIGVK.[G]			8.6073e-06	9.16411e-05	1	3	9	P61978	P61978 [149-163]			Heterogeneous nuclear ribonucleoprotein K OS=Homo sapiens OX=9606 GN=HNRNPK PE=1 SV=1	P61978-2; P61978; P61978-3	0	1518.94	79695.9		793368	512456	249710					High	High	High	High	High	High	High	High	High	3.781e-05	7.323e-07	2.28	60.94
[K].LIILANGGPQALVQIMR.[N]	1xOxidation [M16]	1xOxidation [M16]	0.000389861	9.16411e-05	1	1	1	P14923	P14923 [304-320]			Junction plakoglobin OS=Homo sapiens OX=9606 GN=JUP PE=1 SV=3	P14923	0	1823.06									No Quan Values	Not Found	Not Found	Not Found	High	Not Found	Not Found	Not Found	Not Found	High	3.781e-05	6.389e-05	2.98
[K].LIILASGGPQALVNIMR.[T]	1xOxidation [M16]	1xOxidation [M16]	0.000174967	9.16411e-05	1	1	2	P35222	P35222 [313-329]			Catenin beta-1 OS=Homo sapiens OX=9606 GN=CTNNB1 PE=1 SV=1	P35222	0	1782.03				332969				158108		Not Found	Not Found	Not Found	High	Not Found	Not Found	Not Found	High	High	3.781e-05	2.497e-05	3.4	76.34
[K].LLLIDWPELK.[E]			0.000216247	9.16411e-05	1	3	5	A6NHR9	A6NHR9 [1257-1266]			Structural maintenance of chromosomes flexible hinge domain-containing protein 1 OS=Homo sapiens OX=9606 GN=SMCHD1 PE=1 SV=2	A6NHR9-2; A6NHR9; A6NHR9-3	0	1239.73					1.2429e+06		734108			High	Not Found	High	Not Found	High	Not Found	High	Not Found	High	3.781e-05	3.214e-05	2.52	85.31
[R].LLILGGANVNYR.[T]			7.49808e-05	9.16411e-05	1	2	4	Q9C0D5	Q9C0D5 [918-929]			Protein TANC1 OS=Homo sapiens OX=9606 GN=TANC1 PE=1 SV=3	Q9C0D5-2; Q9C0D5	0	1302.75	407168		742976		383712		508149			High	Not Found	High	Not Found	High	Not Found	High	Not Found	High	3.781e-05	9.253e-06	3.02	64.79
[K].LLIIIQNEDIAGFIHK.[I]			2.24233e-07	9.16411e-05	1	4	2	Q9UK61	Q9UK61 [1275-1290]			Protein TASOR OS=Homo sapiens OX=9606 GN=TASOR PE=1 SV=3	Q9UK61; Q9UK61-4; Q9UK61-3; Q9UK61-2	0	1837.06			213139							Not Found	Not Found	High	Not Found	Not Found	Not Found	Not Found	Not Found	High	3.781e-05	1.02e-08	4.76	77.54
[K].ILLNAGAEINSR.[T]			1.56637e-05	9.16411e-05	2	7	4	Q8IWZ3; O75179	Q8IWZ3 [1173-1184]; O75179 [1201-1212]			Ankyrin repeat and KH domain-containing protein 1 OS=Homo sapiens OX=9606 GN=ANKHD1 PE=1 SV=1 Ankyrin repeat domain-containing protein 17 OS=Homo sapiens OX=9606 GN=ANKRD17 PE=1 SV=3	Q8IWZ3-6; Q8IWZ3; O75179; O75179-7; O75179-6; Q8IWZ3-4; O75179-2	0	1270.71	352293		641143		361160		209423		Shared	High	Not Found	High	Not Found	High	Not Found	High	Not Found	High	3.781e-05	1.484e-06	3.04	53.96
[R].LLLNLSFDTGLR.[N]			0.000481815	9.16411e-05	1	4	4	Q92845	Q92845 [367-378]			Kinesin-associated protein 3 OS=Homo sapiens OX=9606 GN=KIFAP3 PE=1 SV=2	Q92845; Q92845-4; Q92845-3; Q92845-2	0	1361.78		807113		586616		243861		150751		Not Found	High	Not Found	High	Not Found	High	Not Found	High	High	3.781e-05	8.195e-05	1.99	81.84
[K].IILNTAVAEFFK.[S]			7.49808e-05	9.16411e-05	1	5	5	Q9H9A5	Q9H9A5 [63-74]			CCR4-NOT transcription complex subunit 10 OS=Homo sapiens OX=9606 GN=CNOT10 PE=1 SV=1	Q9H9A5-6; Q9H9A5-3; Q9H9A5-4; Q9H9A5; Q9H9A5-2	0	1365.78		3.15033e+06		1.17522e+06		1.13096e+06		986378		Not Found	High	Not Found	High	Not Found	High	Not Found	High	High	3.781e-05	9.238e-06	3.48	81.31
[R].LLLHEVPTGEVWVR.[F]			0.000386287	9.16411e-05	1	2	3	Q9NZM3	Q9NZM3 [1672-1685]			Intersectin-2 OS=Homo sapiens OX=9606 GN=ITSN2 PE=1 SV=3	Q9NZM3; Q9NZM3-2	0	1647.92			460990							High	Not Found	High	Not Found	High	Not Found	Not Found	Not Found	High	3.781e-05	6.332e-05	3.39	63.57
[R].LLLQAIQSFEK.[K]			0.000130304	9.16411e-05	1	3	8	O14920	O14920 [593-603]			Inhibitor of nuclear factor kappa-B kinase subunit beta OS=Homo sapiens OX=9606 GN=IKBKB PE=1 SV=1	O14920-2; O14920; O14920-4	0	1289.75		1573924		961062		681386		782209		Not Found	High	Not Found	High	Not Found	High	Not Found	High	High	3.781e-05	1.774e-05	3.65	72.93
[K].LLLDDSFETK.[K]			0.0001538	9.16411e-05	1	2	5	O00443	O00443 [103-112]			Phosphatidylinositol 4-phosphate 3-kinase C2 domain-containing subunit alpha OS=Homo sapiens OX=9606 GN=PIK3C2A PE=1 SV=2	O00443; O00443-2	0	1180.61	256858		2727047		782150	140127	440729			High	Not Found	High	Not Found	High	Peak Found	High	Not Found	High	3.781e-05	2.144e-05	2.68	64.6
[K].ILLAELEQLK.[G]			0.000368906	9.16411e-05	1	1	5	P08670	P08670 [130-139]			Vimentin OS=Homo sapiens OX=9606 GN=VIM PE=1 SV=4	P08670	0	1169.71			407608		177621		404787	402232		Not Found	Not Found	High	High	High	Not Found	High	High	High	3.781e-05	6.009e-05	2.62	72.31
[K].LLGQFTLIGIPPAPR.[G]			1.11398e-05	9.16411e-05	1	1	6	P38646	P38646 [499-513]			Stress-70 protein, mitochondrial OS=Homo sapiens OX=9606 GN=HSPA9 PE=1 SV=2	P38646	0	1592.95	82013.5	1.4963e+06	485301	1.16528e+06	249780	1.12783e+06	66418	671223		Peak Found	Peak Found	High	High	Peak Found	High	Peak Found	High	High	3.781e-05	9.936e-07	3.29	82.91
[K].LLGSGYGGLTGGSSR.[G]			9.97598e-05	9.16411e-05	1	5	1	Q7Z460	Q7Z460 [692-706]			CLIP-associating protein 1 OS=Homo sapiens OX=9606 GN=CLASP1 PE=1 SV=1	Q7Z460; Q7Z460-2; Q7Z460-4; Q7Z460-3; Q7Z460-5	0	1381.71		972318		198059		65115.6		188985		Not Found	Peak Found	Not Found	Peak Found	Not Found	Peak Found	Not Found	High	High	3.781e-05	1.291e-05	2.09	52.82
[R].LLGSVVFIHR.[Q]			0.000142876	9.16411e-05	1	2	17	P51787	P51787 [250-259]			Potassium voltage-gated channel subfamily KQT member 1 OS=Homo sapiens OX=9606 GN=KCNQ1 PE=1 SV=3	P51787; P51787-2	0	1140.69	1.16294e+07	2.04805e+08	7.68283e+06	59003712	1.864e+06	1.55816e+07				High	High	High	High	High	High	Not Found	Not Found	High	3.781e-05	1.968e-05	2.8	57.51
[K].ILGVWDTAVSLGK.[L]			1.05409e-05	9.16411e-05	1	1	2	Q53RT3	Q53RT3 [253-265]			Retroviral-like aspartic protease 1 OS=Homo sapiens OX=9606 GN=ASPRV1 PE=1 SV=1	Q53RT3	0	1358.77	117112			796337						High	Not Found	Not Found	High	Not Found	Not Found	Not Found	Not Found	High	3.781e-05	9.304e-07	2.7	76.55
[R].ILHAELQQYLGNPQESLDR.[L]			2.32706e-06	9.16411e-05	1	1	4	Q8WVT3	Q8WVT3 [482-500]			Trafficking protein particle complex subunit 12 OS=Homo sapiens OX=9606 GN=TRAPPC12 PE=1 SV=3	Q8WVT3	0	2224.14		911512		389960				359792		Not Found	High	Not Found	High	Not Found	High	Not Found	High	High	3.781e-05	1.589e-07	4.81	63.79
[R].LLHDQVGVIQFGPYK.[Q]			0.000473024	9.16411e-05	1	2	2	P53621	P53621 [942-956]			Coatomer subunit alpha OS=Homo sapiens OX=9606 GN=COPA PE=1 SV=2	P53621-2; P53621	0	1713.93	103273		359429		114444		39762.8			High	Not Found	High	Not Found	Peak Found	Not Found	Peak Found	Not Found	High	3.781e-05	8.008e-05	3.19	62.71
[R].LIHGLSMSMDSEEAMINK.[L]	3xOxidation [M7; M9; M15]	3xOxidation [M7; M9; M15]	1.84885e-05	9.16411e-05	1	2	2	Q13617	Q13617 [443-460]			Cullin-2 OS=Homo sapiens OX=9606 GN=CUL2 PE=1 SV=2	Q13617; Q13617-2	0	2053.92		339989				230261		266225		Not Found	Peak Found	Not Found	Not Found	Not Found	High	Not Found	High	High	3.781e-05	1.788e-06	3.55	44.01
[R].LLHLLLDDMPVKPYSDGEGGIEDENR.[S]			7.02498e-08	9.16411e-05	1	1	10	Q92621	Q92621 [1139-1164]			Nuclear pore complex protein Nup205 OS=Homo sapiens OX=9606 GN=NUP205 PE=1 SV=3	Q92621	0	2925.43	4.05915e+06		2.58947e+06		1.50138e+06					High	Not Found	High	Not Found	High	Not Found	High	Not Found	High	3.781e-05	2.622e-09	6.55	72.55
[R].LLHLLLDDMPVKPYSDGEGGIEDENR.[S]	1xOxidation [M9]	1xOxidation [M9]	1.45367e-09	9.16411e-05	1	1	9	Q92621	Q92621 [1139-1164]			Nuclear pore complex protein Nup205 OS=Homo sapiens OX=9606 GN=NUP205 PE=1 SV=3	Q92621	0	2941.42	9.0379e+06		4.70088e+06		3.46942e+06		2.00881e+06			High	Not Found	High	Not Found	High	Not Found	High	Not Found	High	3.781e-05	2.819e-11	6.67	65.8
[K].LIICNVTGIAHR.[R]	1xCarbamidomethyl [C4]	1xCarbamidomethyl [C4]	4.43542e-05	9.16411e-05	1	1	5	Q7KZ85	Q7KZ85 [1166-1177]			Transcription elongation factor SPT6 OS=Homo sapiens OX=9606 GN=SUPT6H PE=1 SV=2	Q7KZ85	0	1366.76	283991		322006		716753		304583			High	Not Found	High	Not Found	High	Not Found	High	Not Found	High	3.781e-05	5.012e-06	3.41	52.53
[R].LLHLLLDDMPVKPYSDGEGGIEDENR.[S]	1xDeamidated [N25]; 1xOxidation [M9]	1xDeamidated [N25]; 1xOxidation [M9]	1.5097e-05	9.16411e-05	1	1	2	Q92621	Q92621 [1139-1164]			Nuclear pore complex protein Nup205 OS=Homo sapiens OX=9606 GN=NUP205 PE=1 SV=3	Q92621	0	2942.41									No Quan Values	High	Not Found	High	Not Found	Not Found	Not Found	Not Found	Not Found	High	3.781e-05	1.414e-06	6.3
[K].LIHITIEPLYR.[R]			0.000259982	9.16411e-05	1	1	7	Q8NI27	Q8NI27 [386-396]			THO complex subunit 2 OS=Homo sapiens OX=9606 GN=THOC2 PE=1 SV=2	Q8NI27	0	1367.8	1.35125e+06		4.20288e+06		1.20911e+06		1.98921e+06			High	Not Found	High	Not Found	High	Not Found	High	Not Found	High	3.781e-05	3.96e-05	3.88	63.78
[R].LIHLTPADYDDFVNAIR.[S]			9.52515e-06	9.16411e-05	1	4	6	A7E2V4	A7E2V4 [1776-1792]			Zinc finger SWIM domain-containing protein 8 OS=Homo sapiens OX=9606 GN=ZSWIM8 PE=1 SV=1	A7E2V4-5; A7E2V4; A7E2V4-4; A7E2V4-3	0	1973.01									No Quan Values	High	Not Found	High	Not Found	High	Not Found	High	Not Found	High	3.781e-05	8.22e-07	5.01
[R].LLHPSPDLVSQEATLSEAR.[L]			0.00015239	9.16411e-05	1	3	2	Q8IY22	Q8IY22 [373-391]			C-Maf-inducing protein OS=Homo sapiens OX=9606 GN=CMIP PE=1 SV=3	Q8IY22-2; Q8IY22; Q8IY22-3	0	2063.08	450022	928234	515607	798387	592714	771641		697039		Peak Found	Peak Found	Peak Found	Peak Found	Peak Found	High	Not Found	High	High	3.781e-05	2.12e-05	3.12	59.12
[K].LLHSFHSELPVLSDSER.[D]			1.88322e-05	9.16411e-05	1	1	6	Q99567	Q99567 [643-659]			Nuclear pore complex protein Nup88 OS=Homo sapiens OX=9606 GN=NUP88 PE=1 SV=2	Q99567	0	1966		3.07921e+06		698816		1.67794e+06		637221		Not Found	High	Not Found	High	Not Found	High	Not Found	High	High	3.781e-05	1.826e-06	4.49	55.69
[R].ILHTLLASGEDALDFTQESEPSYISDVGPPGR.[S]			6.95885e-09	9.16411e-05	1	2	11	Q8N1F7	Q8N1F7 [144-175]			Nuclear pore complex protein Nup93 OS=Homo sapiens OX=9606 GN=NUP93 PE=1 SV=2	Q8N1F7-2; Q8N1F7	0	3414.67		1.05581e+07		6326672		3.23197e+06		4.50795e+06		Not Found	High	Not Found	High	Not Found	High	Not Found	High	High	3.781e-05	1.753e-10	7.3	80.99
[R].ILHTLLASGEDALDFTQESEPSYISDVGPPGR.[S]	1xDeamidated [Q17]	1xDeamidated [Q17]	5.32883e-08	9.16411e-05	1	2	5	Q8N1F7	Q8N1F7 [144-175]			Nuclear pore complex protein Nup93 OS=Homo sapiens OX=9606 GN=NUP93 PE=1 SV=2	Q8N1F7-2; Q8N1F7	0	3415.65				383442		122167				Not Found	Not Found	Not Found	High	Not Found	High	Not Found	Not Found	High	3.781e-05	1.905e-09	5.95	81.05
[R].LLKIPVDTYNNILTVLK.[L]			7.09494e-05	9.16411e-05	1	1	1	Q96QK1	Q96QK1 [401-417]			Vacuolar protein sorting-associated protein 35 OS=Homo sapiens OX=9606 GN=VPS35 PE=1 SV=2	Q96QK1	1	1957.17		472742								Not Found	High	Not Found	Not Found	Not Found	Not Found	Not Found	Not Found	High	3.781e-05	8.719e-06	2.97	80.06
[K].IIKPLQYQSTVASGTVAR.[V]			2.45929e-06	9.16411e-05	1	1	2	Q13823	Q13823 [56-73]			Nucleolar GTP-binding protein 2 OS=Homo sapiens OX=9606 GN=GNL2 PE=1 SV=1	Q13823	0	1932.09									No Quan Values	Not Found	Not Found	Not Found	High	Not Found	High	Not Found	Not Found	High	3.781e-05	1.701e-07	3.77
[K].IIKPVLTQESATYIAEEYSR.[L]			0.000362174	9.16411e-05	1	2	1	P25205	P25205 [577-596]			DNA replication licensing factor MCM3 OS=Homo sapiens OX=9606 GN=MCM3 PE=1 SV=3	P25205; P25205-2	0	2311.22									No Quan Values	Not Found	Not Found	Not Found	High	Not Found	Not Found	Not Found	Not Found	High	3.781e-05	5.85e-05	3.3
[R].ILHLLTQEALSIHGVK.[E]			2.7447e-09	9.16411e-05	1	2	7	P54886	P54886 [515-530]			Delta-1-pyrroline-5-carboxylate synthase OS=Homo sapiens OX=9606 GN=ALDH18A1 PE=1 SV=2	P54886; P54886-2	0	1772.04		3.49058e+06				4.2424e+06		130979		Not Found	High	Not Found	Not Found	Not Found	High	Not Found	High	High	3.781e-05	5.935e-11	5.61	59.99
[K].ILPEQGLMLTGSADK.[T]	1xOxidation [M8]	1xOxidation [M8]	1.91824e-05	9.16411e-05	1	1	3	Q9Y263	Q9Y263 [159-173]			Phospholipase A-2-activating protein OS=Homo sapiens OX=9606 GN=PLAA PE=1 SV=2	Q9Y263	0	1588.83		803431				436955		225047		Not Found	High	Not Found	Not Found	Not Found	High	Not Found	High	High	3.781e-05	1.868e-06	2.87	59.58
[R].IILQDEDVTTK.[I]			0.000112449	9.16411e-05	1	2	3	Q9UIW2	Q9UIW2 [1566-1576]			Plexin-A1 OS=Homo sapiens OX=9606 GN=PLXNA1 PE=1 SV=3	P51805; Q9UIW2	0	1274.68	142970				313806		111421			High	Not Found	Not Found	Not Found	High	Not Found	High	Not Found	High	3.781e-05	1.493e-05	2.46	49.79
[K].LLLQGLMDSVEAK.[Q]			4.55867e-06	9.16411e-05	1	1	4	Q5VYK3	Q5VYK3 [880-892]			Proteasome adapter and scaffold protein ECM29 OS=Homo sapiens OX=9606 GN=ECPAS PE=1 SV=2	Q5VYK3	0	1416.78	1.78345e+06		2.03873e+06		1.11904e+06		530036			High	Not Found	High	Not Found	High	Not Found	High	Not Found	High	3.781e-05	3.482e-07	3.62	78.03
[K].LLNDEDQVVVNK.[A]			7.99584e-06	9.16411e-05	1	1	4	P35222	P35222 [159-170]			Catenin beta-1 OS=Homo sapiens OX=9606 GN=CTNNB1 PE=1 SV=1	P35222	0	1385.73		1.45584e+06		1.81453e+06				755730		Not Found	High	Not Found	High	Not Found	High	Not Found	High	High	3.781e-05	6.703e-07	4.2	49.45
[R].IINDLLQSLR.[S]			0.000477399	9.16411e-05	1	1	4	Q92945	Q92945 [385-394]			Far upstream element-binding protein 2 OS=Homo sapiens OX=9606 GN=KHSRP PE=1 SV=4	Q92945	0	1184.7	46658	5.60795e+06	132842	3.78703e+06		2.72034e+06		2.05929e+06		Peak Found	High	Peak Found	High	Not Found	High	Not Found	High	High	3.781e-05	8.133e-05	3.24	71.33
[R].ILNEMRDQYEK.[M]			4.12033e-05	9.16411e-05	2	2	2	P02533; Q04695	P02533 [283-293]; Q04695 [252-262]			Keratin, type I cytoskeletal 14 OS=Homo sapiens OX=9606 GN=KRT14 PE=1 SV=4 Keratin, type I cytoskeletal 17 OS=Homo sapiens OX=9606 GN=KRT17 PE=1 SV=2	P02533; Q04695	1	1438.7	608927			835156					Shared	High	Not Found	Not Found	High	Not Found	Not Found	Not Found	Not Found	High	3.781e-05	4.576e-06	3.72	40.76
[K].LLNENSYVPR.[E]	1xDeamidated [N5]	1xDeamidated [N5]	0.000423545	9.16411e-05	1	1	2	P02786	P02786 [146-155]			Transferrin receptor protein 1 OS=Homo sapiens OX=9606 GN=TFRC PE=1 SV=2	P02786	0	1205.62	222535	487700		527629		147979	26365.9	170147		Peak Found	Peak Found	Not Found	High	Not Found	Peak Found	Peak Found	High	High	3.781e-05	7.029e-05	2.77	52.18
[R].IINEPTAAAIAYGLDK.[KRG]			7.22536e-06	9.16411e-05	2	5	9	P11142; P11021	P11142 [172-187]; P11021 [198-213]			Heat shock cognate 71 kDa protein OS=Homo sapiens OX=9606 GN=HSPA8 PE=1 SV=1 Endoplasmic reticulum chaperone BiP OS=Homo sapiens OX=9606 GN=HSPA5 PE=1 SV=2	P54652; P11142; P11021; P11142-2; P34931	0	1659.9	209998	1.39038e+06	565468	1.40481e+06	166589	944833		435585	Shared	High	High	High	High	High	High	Not Found	High	High	3.781e-05	5.992e-07	3.47	68.33
[R].IINEPTAAAIAYGLDKK.[GV]			8.93211e-05	9.16411e-05	1	3	3	P11142	P11142 [172-188]			Heat shock cognate 71 kDa protein OS=Homo sapiens OX=9606 GN=HSPA8 PE=1 SV=1	P54652; P11142; P11142-2	1	1787.99		405715				177193		134255		Not Found	High	Not Found	Not Found	Not Found	High	Not Found	High	High	3.781e-05	1.131e-05	3.87	60.22
[R].IINEPTAAAIAYGLDKR.[E]			4.86337e-05	9.16411e-05	1	1	2	P11021	P11021 [198-214]			Endoplasmic reticulum chaperone BiP OS=Homo sapiens OX=9606 GN=HSPA5 PE=1 SV=2	P11021	1	1816	44673.2	424426	131225	572827	81939.3	269693				Peak Found	Peak Found	Peak Found	High	Peak Found	High	Not Found	Not Found	High	3.781e-05	5.576e-06	3.26	61.55
[R].IINEPTAAAIAYGLDR.[RT]			4.23274e-08	9.16411e-05	1	3	16	P0DMV9	P0DMV9 [172-187]			Heat shock 70 kDa protein 1B OS=Homo sapiens OX=9606 GN=HSPA1B PE=1 SV=1	P17066; P0DMV8-2; P0DMV9	0	1687.9	497753	2.00114e+06	2.55042e+06	4669688	736670	1.22035e+06		798915		High	High	High	High	High	High	High	High	High	3.781e-05	1.457e-09	4.42	69.66
[K].LLNHILDNSEDDTK.[S]			2.84982e-06	9.16411e-05	1	3	2	Q14997	Q14997 [875-888]			Proteasome activator complex subunit 4 OS=Homo sapiens OX=9606 GN=PSME4 PE=1 SV=2	Q14997-3; Q14997-2; Q14997	0	1626.8			1.61906e+06				486133			Not Found	Not Found	High	Not Found	Not Found	Not Found	High	Not Found	High	3.781e-05	2.018e-07	4.03	49.07
[K].LLNDEDPVVVTK.[A]			3.68917e-05	9.16411e-05	1	1	10	P14923	P14923 [150-161]			Junction plakoglobin OS=Homo sapiens OX=9606 GN=JUP PE=1 SV=3	P14923	0	1341.73	1.23115e+06	879080	225249	3.77796e+06	433160	461536	235883	383968		High	High	High	High	High	High	High	High	High	3.781e-05	4.025e-06	3.64	55.16
[K].ILNILDSIDFSQEIPEPLQLDFFDR.[A]			4.7746e-05	9.16411e-05	1	1	3	Q92621	Q92621 [1182-1206]			Nuclear pore complex protein Nup205 OS=Homo sapiens OX=9606 GN=NUP205 PE=1 SV=3	Q92621	0	2977.52									No Quan Values	High	Not Found	High	Not Found	High	Not Found	Not Found	Not Found	High	3.781e-05	5.445e-06	2.98
[K].LINLPEDYSSLINQASNFSCPK.[S]	1xCarbamidomethyl [C20]	1xCarbamidomethyl [C20]	2.77214e-06	9.16411e-05	1	2	6	Q8IWV8-4	Q8IWV8-4 [1600-1621]			Isoform 4 of E3 ubiquitin-protein ligase UBR2 OS=Homo sapiens OX=9606 GN=UBR2	Q8IWV8; Q8IWV8-4	0	2510.22	217242	2.64372e+06	457870		191088		120705			High	Peak Found	High	Not Found	High	Not Found	High	Not Found	High	3.781e-05	1.954e-07	3.5	85.2
[R].IINLTSVLSLQEEINEQGHEVLR.[E]			2.67055e-08	9.16411e-05	1	3	4	P40692	P40692 [500-522]			DNA mismatch repair protein Mlh1 OS=Homo sapiens OX=9606 GN=MLH1 PE=1 SV=1	P40692-3; P40692-2; P40692	0	2634.41		1.38228e+06		565313		290368		663112		Not Found	High	Not Found	High	Not Found	High	Not Found	High	High	3.781e-05	8.488e-10	6.74	82.93
[R].LLNIVSVTGR.[L]			0.00031545	9.16411e-05	1	4	5	Q9ULH0	Q9ULH0 [942-951]			Kinase D-interacting substrate of 220 kDa OS=Homo sapiens OX=9606 GN=KIDINS220 PE=1 SV=3	Q9ULH0-2; Q9ULH0-4; Q9ULH0-3; Q9ULH0	0	1071.65	1.252e+06		1.92039e+06		846592		824679			High	Not Found	High	Not Found	High	Not Found	High	Not Found	High	3.781e-05	4.996e-05	3.09	62.11
[R].LLNNAFEELVAFQR.[A]			2.34859e-06	9.16411e-05	1	2	5	P25205	P25205 [65-78]			DNA replication licensing factor MCM3 OS=Homo sapiens OX=9606 GN=MCM3 PE=1 SV=3	P25205; P25205-2	0	1663.88				1.11105e+06				251322		Not Found	High	Not Found	High	Not Found	Not Found	Not Found	High	High	3.781e-05	1.603e-07	3.32	83.31
[K].LLNQPNQWPLVK.[A]			0.000365525	9.16411e-05	1	1	6	P14923	P14923 [488-499]			Junction plakoglobin OS=Homo sapiens OX=9606 GN=JUP PE=1 SV=3	P14923	0	1449.82	613674		271078	821764	345693	250116		274056		High	Not Found	Peak Found	High	High	High	High	High	High	3.781e-05	5.888e-05	2.89	64.99
[K].LLNSSNIAEHPGFMK.[T]	1xOxidation [M14]	1xOxidation [M14]	0.000250579	9.16411e-05	1	5	3	Q9H9A5	Q9H9A5 [272-286]			CCR4-NOT transcription complex subunit 10 OS=Homo sapiens OX=9606 GN=CNOT10 PE=1 SV=1	Q9H9A5-6; Q9H9A5-3; Q9H9A5-4; Q9H9A5; Q9H9A5-2	0	1673.83		1.00543e+06				378572		568355		Not Found	High	Not Found	Not Found	Not Found	High	Not Found	High	High	3.781e-05	3.824e-05	3.21	46.04
[K].ILNVGDIGGNETVTLR.[Q]			1.46784e-07	9.16411e-05	1	2	3	P22735	P22735 [738-753]			Protein-glutamine gamma-glutamyltransferase K OS=Homo sapiens OX=9606 GN=TGM1 PE=1 SV=4	P22735; P22735-2	0	1670.91				945424		301031		212629		Not Found	Not Found	Not Found	High	Not Found	High	Not Found	High	High	3.781e-05	6.233e-09	3.45	68.11
[K].LLPAAGPAGGEPYR.[L]			8.53008e-05	9.16411e-05	1	1	4	O60934	O60934 [4-17]			Nibrin OS=Homo sapiens OX=9606 GN=NBN PE=1 SV=1	O60934	0	1368.73		4494745		2.37643e+06		1.44569e+06		2.40694e+06		Not Found	High	Not Found	High	Not Found	High	Not Found	High	High	3.781e-05	1.079e-05	3.33	50.99
[K].ILPALCHDITDWVVGTR.[V]	1xCarbamidomethyl [C6]	1xCarbamidomethyl [C6]	3.93301e-07	9.16411e-05	1	2	5	Q86Y56	Q86Y56 [360-376]			Dynein assembly factor 5, axonemal OS=Homo sapiens OX=9606 GN=DNAAF5 PE=1 SV=4	Q86Y56-2; Q86Y56	0	1966.02		1.6671e+06		1.17955e+06		626335		686850		Not Found	High	Not Found	High	Not Found	High	Not Found	High	High	3.781e-05	1.983e-08	4.1	77.35
[R].LINLLEEVFHLMETAPHTMIQQPVK.[S]	2xOxidation [M12; M19]	2xOxidation [M12; M19]	6.17938e-05	9.16411e-05	1	4	3	Q69YN4	Q69YN4 [627-651]			Protein virilizer homolog OS=Homo sapiens OX=9606 GN=VIRMA PE=1 SV=2	Q69YN4-4; Q69YN4-3; Q69YN4-2; Q69YN4	0	2963.54	915103		1.01895e+06		239186		125434			Peak Found	Not Found	High	Not Found	High	Not Found	Peak Found	Not Found	High	3.781e-05	7.421e-06	6.07	82.15
[K].LLLQGEADQSLLTFIDK.[A]			1.71625e-08	9.16411e-05	1	2	4	P78527	P78527 [3051-3067]			DNA-dependent protein kinase catalytic subunit OS=Homo sapiens OX=9606 GN=PRKDC PE=1 SV=3	P78527-2; P78527	0	1904.04					506683					High	Not Found	High	Not Found	High	Not Found	Not Found	Not Found	High	3.781e-05	5.048e-10	4.14	86.6
[R].LIMVLAGASEFDPQYNK.[D]	1xOxidation [M3]	1xOxidation [M3]	1.14492e-06	9.16411e-05	1	1	9	Q9UGP8	Q9UGP8 [246-262]			Translocation protein SEC63 homolog OS=Homo sapiens OX=9606 GN=SEC63 PE=1 SV=2	Q9UGP8	0	1911.95		3.53471e+06		1.88463e+06		1.24459e+06		1.07831e+06		Not Found	High	Not Found	High	Not Found	High	Not Found	High	High	3.781e-05	6.948e-08	3.55	71.86
[R].LIMVLAGASEFDPQYNK.[D]			5.42791e-08	9.16411e-05	1	1	9	Q9UGP8	Q9UGP8 [246-262]			Translocation protein SEC63 homolog OS=Homo sapiens OX=9606 GN=SEC63 PE=1 SV=2	Q9UGP8	0	1895.96		2.81364e+06		814334		614863		444691		Not Found	High	Not Found	High	Not Found	High	Not Found	High	High	3.781e-05	1.951e-09	4.39	77.82
[K].LLLQGLMDSVEAK.[Q]	1xOxidation [M7]	1xOxidation [M7]	2.32761e-05	9.16411e-05	1	1	7	Q5VYK3	Q5VYK3 [880-892]			Proteasome adapter and scaffold protein ECM29 OS=Homo sapiens OX=9606 GN=ECPAS PE=1 SV=2	Q5VYK3	0	1432.77	7168924		7.29053e+06		3.85853e+06		2.71126e+06			High	Not Found	High	Not Found	Peak Found	Not Found	High	Not Found	High	3.781e-05	2.361e-06	3.79	66.58
[K].LILSDELKPAHR.[K]			0.000142876	9.16411e-05	1	2	2	Q9UBF8	Q9UBF8 [239-250]			Phosphatidylinositol 4-kinase beta OS=Homo sapiens OX=9606 GN=PI4KB PE=1 SV=1	Q9UBF8-2; Q9UBF8	0	1391.8				350477		204457		321131		Not Found	Not Found	Not Found	Peak Found	Not Found	High	Not Found	High	High	3.781e-05	1.976e-05	2.87	44.27
[R].LLLSDMWSSK.[E]			0.000327286	9.16411e-05	1	2	1	Q13835	Q13835 [706-715]			Plakophilin-1 OS=Homo sapiens OX=9606 GN=PKP1 PE=1 SV=2	Q13835; Q13835-2	0	1179.61	102765									High	Not Found	Not Found	Not Found	Not Found	Not Found	Not Found	Not Found	High	3.781e-05	5.187e-05	1.82	72.82
[R].ILLSQTTGVAIPLHASSLDDVSLASTPK.[R]			8.60901e-05	9.16411e-05	1	2	2	P12270	P12270 [616-643]			Nucleoprotein TPR OS=Homo sapiens OX=9606 GN=TPR PE=1 SV=3	P12270-2; P12270	0	2834.55									No Quan Values	High	Not Found	Not Found	Not Found	Not Found	Not Found	High	Not Found	High	3.781e-05	1.085e-05	2.99
[R].LLLSYGADPTLATYSGR.[T]			1.88184e-08	9.16411e-05	1	3	5	Q6W2J9	Q6W2J9 [1548-1564]			BCL-6 corepressor OS=Homo sapiens OX=9606 GN=BCOR PE=1 SV=1	Q6W2J9; Q6W2J9-4; Q6W2J9-2	0	1797.94			251331		353775		247571			High	Not Found	High	Not Found	High	Not Found	High	Not Found	High	3.781e-05	5.649e-10	3.23	72.11
[K].LLITGTEQFNQKPK.[K]			3.12402e-07	9.16411e-05	1	3	8	Q92538	Q92538 [702-715]			Golgi-specific brefeldin A-resistance guanine nucleotide exchange factor 1 OS=Homo sapiens OX=9606 GN=GBF1 PE=1 SV=2	Q92538; Q92538-2; Q92538-3	0	1616.9	3.13038e+06		2625526		1.62035e+06		773631			High	Not Found	High	Not Found	High	Not Found	High	Not Found	High	3.781e-05	1.51e-08	3.83	48.33
[R].LLLTGTPLQNK.[L]			2.64798e-05	9.16411e-05	3	7	5	P51532; P51531; P51532-4	P51532 [907-917]; P51531 [877-887]; P51532-4 [907-917]			Transcription activator BRG1 OS=Homo sapiens OX=9606 GN=SMARCA4 PE=1 SV=2 Probable global transcription activator SNF2L2 OS=Homo sapiens OX=9606 GN=SMARCA2 PE=1 SV=2 Isoform 4 of Transcription activator BRG1 OS=Homo sapiens OX=9606 GN=SMARCA4	P51532; P51531-2; P51532-5; P51531; P51532-2; P51532-4; P51532-3	0	1197.72	701686		1.30467e+06		496666		522629	491330	Shared	High	Not Found	High	Not Found	High	Not Found	High	Peak Found	High	3.781e-05	2.735e-06	2.94	58.26
[R].LLITGTPLQNSLK.[E]			2.93035e-05	9.16411e-05	1	4	4	O14646	O14646 [639-651]			Chromodomain-helicase-DNA-binding protein 1 OS=Homo sapiens OX=9606 GN=CHD1 PE=1 SV=2	O14647; O14646-2; O14647-2; O14646	0	1397.84	279984		447870		683470		412972			High	Not Found	High	Not Found	High	Not Found	High	Not Found	High	3.781e-05	3.069e-06	3.09	65.6
[K].ILLTQENPFFR.[K]			0.0001156	9.16411e-05	1	3	8	Q08J23	Q08J23 [629-639]			RNA cytosine C(5)-methyltransferase NSUN2 OS=Homo sapiens OX=9606 GN=NSUN2 PE=1 SV=2	Q08J23-3; Q08J23; Q08J23-2	0	1377.75		3.19324e+07	175153	27538478		1.52263e+07		1.51294e+07		Not Found	High	Peak Found	High	Not Found	High	Not Found	High	High	3.781e-05	1.543e-05	3.38	73.97
[R].LIMVLAGASEFDPQYNK.[D]	1xDeamidated [Q14]	1xDeamidated [Q14]	7.7779e-06	9.16411e-05	1	1	4	Q9UGP8	Q9UGP8 [246-262]			Translocation protein SEC63 homolog OS=Homo sapiens OX=9606 GN=SEC63 PE=1 SV=2	Q9UGP8	0	1896.94				558428						Not Found	High	Not Found	High	Not Found	High	Not Found	Not Found	High	3.781e-05	6.512e-07	2.87	77.8
[R].LIITSAEASPAECCQHAK.[I]	2xCarbamidomethyl [C13; C14]	2xCarbamidomethyl [C13; C14]	1.74859e-07	9.16411e-05	1	6	1	Q14C86	Q14C86 [58-75]			GTPase-activating protein and VPS9 domain-containing protein 1 OS=Homo sapiens OX=9606 GN=GAPVD1 PE=1 SV=2	Q14C86; Q14C86-5; Q14C86-3; Q14C86-2; Q14C86-4; Q14C86-6	0	1985.94									No Quan Values	Not Found	Not Found	High	Not Found	Not Found	Not Found	Not Found	Not Found	High	3.781e-05	7.684e-09	4.77
[K].ILLVDSPGMGNADDEQQEEGTSSK.[Q]	1xOxidation [M9]	1xOxidation [M9]	8.2118e-10	9.16411e-05	1	1	10	Q9UKN8	Q9UKN8 [606-629]			General transcription factor 3C polypeptide 4 OS=Homo sapiens OX=9606 GN=GTF3C4 PE=1 SV=2	Q9UKN8	0	2536.14		3.78107e+06		2.41139e+06		1.33543e+06		1.99347e+06		Not Found	High	Not Found	High	Not Found	High	Not Found	High	High	3.781e-05	1.44e-11	4.68	56.58
[K].ILLVDSPGMGNADDEQQEEGTSSK.[Q]	1xDeamidated [N11]; 1xOxidation [M9]	1xDeamidated [N11]; 1xOxidation [M9]	0.000538098	9.16411e-05	1	1	1	Q9UKN8	Q9UKN8 [606-629]			General transcription factor 3C polypeptide 4 OS=Homo sapiens OX=9606 GN=GTF3C4 PE=1 SV=2	Q9UKN8	0	2537.12									No Quan Values	Not Found	Not Found	Not Found	Not Found	Not Found	High	Not Found	Not Found	High	3.781e-05	9.332e-05	4.05
[K].ILLVDSPGMGNADDEQQEEGTSSK.[Q]	1xOxidation [M9]; 1xPhospho [S6(100)]	1xOxidation [M9]; 1xPhospho [S6(100); T21(0); S22(0); S23(0)]	9.26553e-06	9.16411e-05	1	1	4	Q9UKN8	Q9UKN8 [606-629]	Q9UKN8 1xPhospho [S611(100); T626(0); S627(0); S628(0)]	Q9UKN8 1xPhospho [S611(100)]	General transcription factor 3C polypeptide 4 OS=Homo sapiens OX=9606 GN=GTF3C4 PE=1 SV=2	Q9UKN8	0	2616.1						227026		712145		Not Found	Not Found	Not Found	High	Not Found	Peak Found	Not Found	High	High	3.781e-05	7.968e-07	1.1	66.89
[K].ILLVDSPGMGNADDEQQEEGTSSK.[Q]	1xDeamidated [N11]; 1xOxidation [M9]; 1xPhospho [S6(100)]	1xDeamidated [N11]; 1xOxidation [M9]; 1xPhospho [S6(100); T21(0); S22(0); S23(0)]	2.37089e-05	9.16411e-05	1	1	1	Q9UKN8	Q9UKN8 [606-629]	Q9UKN8 1xPhospho [S611(100); T626(0); S627(0); S628(0)]	Q9UKN8 1xPhospho [S611(100)]	General transcription factor 3C polypeptide 4 OS=Homo sapiens OX=9606 GN=GTF3C4 PE=1 SV=2	Q9UKN8	0	2617.09									No Quan Values	Not Found	Not Found	Not Found	High	Not Found	Not Found	Not Found	Not Found	High	3.781e-05	2.392e-06	2.87
[R].LLLVQTGSSSPCLDLSR.[L]	1xCarbamidomethyl [C12]	1xCarbamidomethyl [C12]	4.95027e-08	9.16411e-05	1	1	4	Q9NVE7	Q9NVE7 [688-704]			4'-phosphopantetheine phosphatase OS=Homo sapiens OX=9606 GN=PANK4 PE=1 SV=1	Q9NVE7	0	1845.97		1.51379e+06		699387				954010		Not Found	High	Not Found	High	Not Found	High	Not Found	High	High	3.781e-05	1.741e-09	4.23	71.03
[K].ILMLSFDLR.[V]			0.000393467	9.16411e-05	1	3	2	Q96RT7	Q96RT7 [70-78]			Gamma-tubulin complex component 6 OS=Homo sapiens OX=9606 GN=TUBGCP6 PE=1 SV=3	Q96RT7-2; Q96RT7; Q96RT7-3	0	1107.62	66298.6		120473				42586.2			High	Not Found	High	Not Found	Not Found	Not Found	Peak Found	Not Found	High	3.781e-05	6.444e-05	2.42	80.6
[K].ILMLSFDLR.[V]	1xOxidation [M3]	1xOxidation [M3]	0.000635076	9.16411e-05	1	3	3	Q96RT7	Q96RT7 [70-78]			Gamma-tubulin complex component 6 OS=Homo sapiens OX=9606 GN=TUBGCP6 PE=1 SV=3	Q96RT7-2; Q96RT7; Q96RT7-3	0	1123.62	161636		299741		76298.6		166680			High	Not Found	High	Not Found	Peak Found	Not Found	High	Not Found	High	3.781e-05	0.0001133	2.25	75.16
[R].LIMNPSYYNLGDVSHDSVNK.[F]	1xOxidation [M3]	1xOxidation [M3]	2.00817e-06	9.16411e-05	1	1	2	Q8N3C0	Q8N3C0 [1763-1782]			Activating signal cointegrator 1 complex subunit 3 OS=Homo sapiens OX=9606 GN=ASCC3 PE=1 SV=3	Q8N3C0	0	2282.08	91846.6		349550		158309					Peak Found	Not Found	High	Not Found	High	Not Found	Not Found	Not Found	High	3.781e-05	1.333e-07	4.56	57.26
[K].LLMQPLSSIHVR.[T]	1xOxidation [M3]	1xOxidation [M3]	0.000100683	9.16411e-05	1	2	3	Q5UIP0	Q5UIP0 [319-330]			Telomere-associated protein RIF1 OS=Homo sapiens OX=9606 GN=RIF1 PE=1 SV=2	Q5UIP0-2; Q5UIP0	0	1409.79			503350		158816		56143.5			High	Not Found	High	Not Found	High	Not Found	Peak Found	Not Found	High	3.781e-05	1.312e-05	2.45	51.77
[K].LLLTVDTTDDNFMPK.[R]	1xOxidation [M13]	1xOxidation [M13]	3.62099e-06	9.16411e-05	1	1	2	Q5T447	Q5T447 [294-308]			E3 ubiquitin-protein ligase HECTD3 OS=Homo sapiens OX=9606 GN=HECTD3 PE=1 SV=1	Q5T447	0	1738.86								231230		Not Found	High	Not Found	Not Found	Not Found	Not Found	Not Found	High	High	3.781e-05	2.66e-07	3.07	69.95
[K].LTFMDLELK.[L]			0.000589987	9.16411e-05	1	2	3	A6NHR9	A6NHR9 [526-534]			Structural maintenance of chromosomes flexible hinge domain-containing protein 1 OS=Homo sapiens OX=9606 GN=SMCHD1 PE=1 SV=2	A6NHR9-2; A6NHR9	0	1109.59			96631.4		478050	26301.3	120295			Not Found	Not Found	High	Not Found	High	Peak Found	High	Not Found	High	3.781e-05	0.0001042	1.76	77.25
[R].LLTSFLPAQLLR.[L]			5.28373e-05	9.16411e-05	1	4	5	P08195	P08195 [440-451]			4F2 cell-surface antigen heavy chain OS=Homo sapiens OX=9606 GN=SLC3A2 PE=1 SV=3	P08195-3; P08195-2; P08195; P08195-4	0	1371.84		6.57243e+06		3.4964e+06		2.69395e+06		1.51234e+06		Not Found	High	Not Found	High	Not Found	High	Not Found	High	High	3.781e-05	6.141e-06	3.13	83.73
[K].LITSVADVVNNDPMVGSK.[L]	1xOxidation [M14]	1xOxidation [M14]	7.28685e-09	9.16411e-05	1	2	7	P06737	P06737 [623-640]			Glycogen phosphorylase, liver form OS=Homo sapiens OX=9606 GN=PYGL PE=1 SV=4	P06737-2; P06737	0	1874.95		3.05301e+06		3265107		415353		2.31267e+06		Not Found	High	Not Found	High	Not Found	High	Not Found	High	High	3.781e-05	1.852e-10	4.77	63.81
[K].LNPIIKPLMETIK.[K]	1xOxidation [M9]	1xOxidation [M9]	0.000573916	9.16411e-05	1	1	3	O14981	O14981 [874-886]			TATA-binding protein-associated factor 172 OS=Homo sapiens OX=9606 GN=BTAF1 PE=1 SV=2	O14981	0	1525.9	458273		508389		236849		137588			High	Not Found	High	Not Found	Peak Found	Not Found	High	Not Found	High	3.781e-05	0.0001005	2.72	56.32
[R].LNPNLYDNGK.[V]	1xDeamidated [N8]	1xDeamidated [N8]	0.000677345	9.16411e-05	1	1	1	Q9C0C9	Q9C0C9 [1029-1038]			(E3-independent) E2 ubiquitin-conjugating enzyme OS=Homo sapiens OX=9606 GN=UBE2O PE=1 SV=3	Q9C0C9	0	1148.56									No Quan Values	Not Found	Not Found	High	Not Found	Not Found	Not Found	Not Found	Not Found	High	3.781e-05	0.0001218	2.08
[K].INPSSMFDVQVK.[R]			0.000262387	9.16411e-05	1	2	3	P06737	P06737 [558-569]			Glycogen phosphorylase, liver form OS=Homo sapiens OX=9606 GN=PYGL PE=1 SV=4	P06737-2; P06737	0	1364.69		1.05244e+06		701485				832934		Not Found	High	Not Found	High	Not Found	Not Found	Not Found	High	High	3.781e-05	4.017e-05	3.48	65.46
[K].INPSSMFDVQVK.[R]	1xOxidation [M6]	1xOxidation [M6]	0.000330313	9.16411e-05	1	2	4	P06737	P06737 [558-569]			Glycogen phosphorylase, liver form OS=Homo sapiens OX=9606 GN=PYGL PE=1 SV=4	P06737-2; P06737	0	1380.68		1.94178e+06		1.61329e+06		396022		917070		Not Found	High	Not Found	High	Not Found	High	Not Found	High	High	3.781e-05	5.243e-05	3.25	53.7
[K].INPVCPADLVIDHSIQVDFNR.[R]	1xCarbamidomethyl [C5]	1xCarbamidomethyl [C5]	0.000171774	9.16411e-05	1	1	3	P21399	P21399 [114-134]			Cytoplasmic aconitate hydratase OS=Homo sapiens OX=9606 GN=ACO1 PE=1 SV=3	P21399	0	2422.22									No Quan Values	Not Found	High	Not Found	High	Not Found	Not Found	Not Found	High	High	3.781e-05	2.454e-05	3.95
[K].LNQALLDLHALGSAR.[T]			1.62477e-06	9.16411e-05	1	1	8	P02792	P02792 [107-121]			Ferritin light chain OS=Homo sapiens OX=9606 GN=FTL PE=1 SV=2	P02792	0	1591.89	154670		720295	243312	3.12329e+06	319006	811548	313701		Peak Found	Not Found	High	Peak Found	High	High	High	High	High	3.781e-05	1.047e-07	4.53	62.89
[R].INQALQFSGK.[Q]			0.000191847	9.16411e-05	1	1	2	Q9NQX4	Q9NQX4 [417-426]			Unconventional myosin-Vc OS=Homo sapiens OX=9606 GN=MYO5C PE=1 SV=2	Q9NQX4	0	1105.6	150549			483706			75879.8			High	Not Found	High	Peak Found	Not Found	Not Found	Peak Found	Not Found	High	3.781e-05	2.78e-05	2.58	44.99
[R].LNQDQLDAVSK.[Y]			0.000646876	9.16411e-05	1	2	5	Q14444	Q14444 [88-98]			Caprin-1 OS=Homo sapiens OX=9606 GN=CAPRIN1 PE=1 SV=2	Q14444; Q14444-2	0	1230.63				2249992		2.46887e+06		3.48128e+06		Not Found	Not Found	Not Found	High	Not Found	High	Not Found	High	High	3.781e-05	0.000116	4.02	43.89
[R].INQEATPGDIVEK.[L]			6.35252e-05	9.16411e-05	1	2	7	Q7Z401	Q7Z401 [1047-1059]			C-myc promoter-binding protein OS=Homo sapiens OX=9606 GN=DENND4A PE=1 SV=2	Q7Z401; Q7Z401-2	0	1413.72	613233				794688		529687			High	Not Found	Not Found	Not Found	High	Not Found	High	Not Found	High	3.781e-05	7.638e-06	3.85	45.35
[K].LNPIIKPLMETIK.[K]			1.91824e-05	9.16411e-05	1	1	4	O14981	O14981 [874-886]			TATA-binding protein-associated factor 172 OS=Homo sapiens OX=9606 GN=BTAF1 PE=1 SV=2	O14981	0	1509.91	552903		258023							High	Not Found	High	Not Found	High	Not Found	Not Found	Not Found	High	3.781e-05	1.872e-06	2.79	64.61
[R].LNQLKPGLQYK.[L]			4.68745e-05	9.16411e-05	2	7	13	Q12906; Q12906-7	Q12906 [409-419]; Q12906-7 [409-419]			Interleukin enhancer-binding factor 3 OS=Homo sapiens OX=9606 GN=ILF3 PE=1 SV=3 Isoform 7 of Interleukin enhancer-binding factor 3 OS=Homo sapiens OX=9606 GN=ILF3	Q12906; Q12906-5; Q12906-7; Q12906-6; Q12906-4; Q12906-2; Q12906-3	0	1301.76	176540	51343001	832269	56434478	406838	42412899	110673	30542231	Shared	High	High	High	High	High	High	Peak Found	High	High	3.781e-05	5.313e-06	4.12	40.52
[K].LNQVCFDDDGTSSPQDR.[L]	1xCarbamidomethyl [C5]	1xCarbamidomethyl [C5]	3.18133e-08	9.16411e-05	1	2	9	Q8N1F7	Q8N1F7 [418-434]			Nuclear pore complex protein Nup93 OS=Homo sapiens OX=9606 GN=NUP93 PE=1 SV=2	Q8N1F7-2; Q8N1F7	0	1953.82		3.07362e+06		3.45826e+06		2.28108e+06		2.05876e+06		Not Found	High	Not Found	High	Not Found	High	Not Found	High	High	3.781e-05	1.042e-09	4.68	50.46
[K].INQVFHGSCITEGNELTK.[T]	1xCarbamidomethyl [C9]	1xCarbamidomethyl [C9]	1.30187e-08	9.16411e-05	1	2	4	P78527	P78527 [1896-1913]			DNA-dependent protein kinase catalytic subunit OS=Homo sapiens OX=9606 GN=PRKDC PE=1 SV=3	P78527-2; P78527	0	2046.99	139860		369934		416304					High	Not Found	High	Not Found	High	Not Found	High	Not Found	High	3.781e-05	3.653e-10	5.08	49.84
[K].LNQWCNVVR.[W]	1xCarbamidomethyl [C5]	1xCarbamidomethyl [C5]	0.000327286	9.16411e-05	1	1	3	P07814	P07814 [1144-1152]			Bifunctional glutamate/proline--tRNA ligase OS=Homo sapiens OX=9606 GN=EPRS1 PE=1 SV=5	P07814	0	1188.59	470414		1.66279e+06		429479		221688	34751.4		Peak Found	Not Found	High	Not Found	High	Not Found	High	Peak Found	High	3.781e-05	5.173e-05	2.83	49.81
[R].LNRVEDKVTQLDQR.[L]			3.62182e-05	9.16411e-05	1	2	6	P51787	P51787 [592-605]			Potassium voltage-gated channel subfamily KQT member 1 OS=Homo sapiens OX=9606 GN=KCNQ1 PE=1 SV=3	P51787; P51787-2	2	1713.92	2.52386e+06	14290987	924955	1.53258e+06	188426	1.07296e+06		166010		High	High	High	High	Peak Found	High	Not Found	Peak Found	High	3.781e-05	3.964e-06	4.81	38.4
[R].LNSAIIYDRDFSYNYFGFK.[T]			9.69989e-07	9.16411e-05	1	1	5	P23921	P23921 [131-149]			Ribonucleoside-diphosphate reductase large subunit OS=Homo sapiens OX=9606 GN=RRM1 PE=1 SV=1	P23921	1	2333.12		3.22913e+06		2171722		1.15417e+06		1.09743e+06		Not Found	High	Not Found	High	Not Found	High	Not Found	High	High	3.781e-05	5.718e-08	6.02	76.15
[R].INSAPQQIEVFPPFR.[L]			1.02536e-05	9.16411e-05	1	1	9	Q8TEM1	Q8TEM1 [1068-1082]			Nuclear pore membrane glycoprotein 210 OS=Homo sapiens OX=9606 GN=NUP210 PE=1 SV=3	Q8TEM1	0	1742.92	443022		887460		734068		987127			High	Not Found	High	Not Found	High	Not Found	High	Not Found	High	3.781e-05	9.022e-07	3.56	72.92
[R].LNSELQQQLK.[DE]			0.00050918	9.16411e-05	1	8	2	Q96D71	Q96D71 [765-774]			RalBP1-associated Eps domain-containing protein 1 OS=Homo sapiens OX=9606 GN=REPS1 PE=1 SV=3	Q96D71; Q96D71-4; Q8NFH8; Q8NFH8-3; Q8NFH8-2; Q96D71-2; Q96D71-3; Q8NFH8-4	0	1200.66								339372		Not Found	Not Found	Not Found	High	Not Found	Not Found	Not Found	High	High	3.781e-05	8.762e-05	2.56	43.61
[K].INSENADALAQLLTLAR.[W]			1.59432e-08	9.16411e-05	1	1	8	Q8IWV7	Q8IWV7 [1218-1234]			E3 ubiquitin-protein ligase UBR1 OS=Homo sapiens OX=9606 GN=UBR1 PE=1 SV=1	Q8IWV7	0	1812.98			720723		263228		520431			High	Not Found	High	Not Found	High	Not Found	High	Not Found	High	3.781e-05	4.655e-10	4.39	86.8
[R].LNSSDPSLIGLK.[Q]			0.000389861	9.16411e-05	1	1	3	Q9UHI6	Q9UHI6 [266-277]			Probable ATP-dependent RNA helicase DDX20 OS=Homo sapiens OX=9606 GN=DDX20 PE=1 SV=2	Q9UHI6	0	1243.69	84881		510133	646045						Peak Found	Not Found	Peak Found	High	Not Found	High	Not Found	High	High	3.781e-05	6.394e-05	2.49	58.44
[K].LNQSGTSVGTDEESVVTQEEER.[D]			0.00031545	9.16411e-05	2	2	1	Q99666; O14715	Q99666 [1308-1329]; O14715 [1308-1329]			RANBP2-like and GRIP domain-containing protein 5/6 OS=Homo sapiens OX=9606 GN=RGPD5 PE=1 SV=3 RANBP2-like and GRIP domain-containing protein 8 OS=Homo sapiens OX=9606 GN=RGPD8 PE=1 SV=2	Q99666; O14715	0	2394.09									No Quan Values	High	Not Found	Not Found	Not Found	Not Found	Not Found	Not Found	Not Found	High	3.781e-05	5.001e-05	2.22
[R].LNTFGDEVFNDPK.[V]			4.47646e-05	9.16411e-05	1	1	6	P11047	P11047 [256-268]			Laminin subunit gamma-1 OS=Homo sapiens OX=9606 GN=LAMC1 PE=1 SV=3	P11047	0	1495.71	597535		1.22314e+06	303359	41804.4		333546			High	Not Found	High	Peak Found	High	Not Found	High	Not Found	High	3.781e-05	5.069e-06	4.3	61.9
[K].LNPASAEIMLLR.[K]	1xOxidation [M9]	1xOxidation [M9]	0.000133955	9.16411e-05	1	2	1	Q9UJC3	Q9UJC3 [624-635]			Protein Hook homolog 1 OS=Homo sapiens OX=9606 GN=HOOK1 PE=1 SV=2	Q9UJC3; Q9UJC3-2	0	1343.74									No Quan Values	Not Found	Not Found	Not Found	High	Not Found	Not Found	Not Found	Not Found	High	3.781e-05	1.832e-05	2.81
[R].LNNPGSTVFTEDCNILLK.[L]	1xCarbamidomethyl [C13]	1xCarbamidomethyl [C13]	3.15216e-08	9.16411e-05	2	3	11	P26358; P26358-2	P26358 [1179-1196]; P26358-2 [1195-1212]			DNA (cytosine-5)-methyltransferase 1 OS=Homo sapiens OX=9606 GN=DNMT1 PE=1 SV=2 Isoform 2 of DNA (cytosine-5)-methyltransferase 1 OS=Homo sapiens OX=9606 GN=DNMT1	P26358-3; P26358; P26358-2	0	2035.02	1.79991e+06		1.84598e+06		936432		318983		Shared	High	Not Found	High	Not Found	High	Not Found	High	Not Found	High	3.781e-05	1.029e-09	4.5	72.03
[K].LNFLDQIAK.[Y]			0.00060095	9.16411e-05	1	2	1	Q9UGL1	Q9UGL1 [101-109]			Lysine-specific demethylase 5B OS=Homo sapiens OX=9606 GN=KDM5B PE=1 SV=3	Q9UGL1; Q9UGL1-2	0	1061.6									No Quan Values	Not Found	Not Found	High	Not Found	Not Found	Not Found	Not Found	Not Found	High	3.781e-05	0.0001061	2.93
[R].LNFSDQPNLTQWIR.[T]			3.24128e-07	9.16411e-05	1	2	5	Q8IWV8-4	Q8IWV8-4 [1235-1248]			Isoform 4 of E3 ubiquitin-protein ligase UBR2 OS=Homo sapiens OX=9606 GN=UBR2	Q8IWV8; Q8IWV8-4	0	1731.88	591052		1.03836e+06		522591		374959			High	Not Found	High	Not Found	High	Not Found	High	Not Found	High	3.781e-05	1.569e-08	4.06	77.94
[K].LNGDTEEGFNR.[L]			3.58862e-05	9.16411e-05	1	1	1	Q9BQ39	Q9BQ39 [70-80]			ATP-dependent RNA helicase DDX50 OS=Homo sapiens OX=9606 GN=DDX50 PE=1 SV=1	Q9BQ39	0	1251.56									No Quan Values	Not Found	Not Found	Not Found	Not Found	Not Found	Not Found	Not Found	High	High	3.781e-05	3.898e-06	2.23
[K].LNGDTEEGFNR.[L]	1xDeamidated [N2]	1xDeamidated [N2]	0.000397107	9.16411e-05	1	1	3	Q9BQ39	Q9BQ39 [70-80]			ATP-dependent RNA helicase DDX50 OS=Homo sapiens OX=9606 GN=DDX50 PE=1 SV=1	Q9BQ39	0	1252.54		526309			94423.5	600299		197341		Not Found	Peak Found	Not Found	Not Found	Peak Found	High	Not Found	High	High	3.781e-05	6.554e-05	2.67	44.06
[K].LNGWYMEKEEPIYK.[T]	1xDeamidated [N2]; 1xOxidation [M6]	1xDeamidated [N2]; 1xOxidation [M6]	0.000222305	9.16411e-05	1	1	1	Q5VYK3	Q5VYK3 [1443-1456]			Proteasome adapter and scaffold protein ECM29 OS=Homo sapiens OX=9606 GN=ECPAS PE=1 SV=2	Q5VYK3	1	1816.85	81571									High	Not Found	Not Found	Not Found	Not Found	Not Found	Not Found	Not Found	High	3.781e-05	3.306e-05	2.58	55.38
[R].INHESQWPSHVSQR.[Q]			0.000451742	9.16411e-05	1	4	3	Q8NFD5	Q8NFD5 [1493-1506]			AT-rich interactive domain-containing protein 1B OS=Homo sapiens OX=9606 GN=ARID1B PE=1 SV=2	Q8NFD5-3; Q8NFD5; Q8NFD5-2; Q8NFD5-4	0	1704.82	147871		249344		311248		127177			Peak Found	Not Found	Peak Found	Not Found	High	Not Found	High	Not Found	High	3.781e-05	7.595e-05	2.22	32.19
[K].INHLEYEDQYKDDNFGEGNDGGILDDK.[L]			3.7898e-08	9.16411e-05	1	1	8	O60216	O60216 [206-232]			Double-strand-break repair protein rad21 homolog OS=Homo sapiens OX=9606 GN=RAD21 PE=1 SV=2	O60216	1	3113.36		1.29685e+06		1.55806e+06		588066		658210		Not Found	High	Not Found	High	Not Found	High	Not Found	High	High	3.781e-05	1.28e-09	6.72	58.44
[R].LNKPYIYGPTSQGER.[M]			7.56591e-06	9.16411e-05	1	1	3	P19447	P19447 [575-589]			General transcription and DNA repair factor IIH helicase subunit XPB OS=Homo sapiens OX=9606 GN=ERCC3 PE=1 SV=1	P19447	0	1722.88		1.80042e+06		1.29474e+06		791197		1.1e+06		Not Found	Peak Found	Not Found	High	Not Found	High	Not Found	High	High	3.781e-05	6.319e-07	4.39	41.88
[K].LNLEHIATSSAVSK.[E]			1.52331e-06	9.16411e-05	1	1	10	Q96QK1	Q96QK1 [383-396]			Vacuolar protein sorting-associated protein 35 OS=Homo sapiens OX=9606 GN=VPS35 PE=1 SV=2	Q96QK1	0	1469.8	166735	56622540	534880	1.19126e+07	169952	12072568		12632969		Peak Found	High	Peak Found	High	Peak Found	High	Not Found	High	High	3.781e-05	9.648e-08	4.71	48.16
[K].LNNQCELLSQLK.[G]	1xCarbamidomethyl [C5]	1xCarbamidomethyl [C5]	0.000183213	9.16411e-05	1	5	3	Q3V6T2	Q3V6T2 [1306-1317]			Girdin OS=Homo sapiens OX=9606 GN=CCDC88A PE=1 SV=2	Q3V6T2; Q3V6T2-2; Q3V6T2-4; Q3V6T2-5; Q3V6T2-3	0	1459.76			267721		295155					Not Found	Not Found	High	Not Found	High	Not Found	High	Not Found	High	3.781e-05	2.624e-05	3.03	58.97
[R].LNLHYAVVSK.[R]			0.000216247	9.16411e-05	1	2	8	P47897	P47897 [487-496]			Glutamine--tRNA ligase OS=Homo sapiens OX=9606 GN=QARS1 PE=1 SV=1	P47897-2; P47897	0	1143.65		1.06552e+07		5556792		5.36873e+06		7.15969e+06		Not Found	High	Not Found	High	Not Found	High	Not Found	High	High	3.781e-05	3.202e-05	3.28	44.61
[K].LNLLHEFLQTEIK.[N]			4.27191e-08	9.16411e-05	2	2	9	P26358; P26358-2	P26358 [46-58]; P26358-2 [46-58]			DNA (cytosine-5)-methyltransferase 1 OS=Homo sapiens OX=9606 GN=DNMT1 PE=1 SV=2 Isoform 2 of DNA (cytosine-5)-methyltransferase 1 OS=Homo sapiens OX=9606 GN=DNMT1	P26358; P26358-2	0	1597.89	1.69345e+06		3.08819e+06		912601		454093		Shared	High	Not Found	High	Not Found	High	Not Found	High	Not Found	High	3.781e-05	1.476e-09	4.33	73.89
[K].INILLQTYISR.[G]			0.000148237	9.16411e-05	1	1	4	Q8N3C0	Q8N3C0 [1057-1067]			Activating signal cointegrator 1 complex subunit 3 OS=Homo sapiens OX=9606 GN=ASCC3 PE=1 SV=3	Q8N3C0	0	1333.78	136834		522174							High	Not Found	High	Not Found	High	Not Found	High	Not Found	High	3.781e-05	2.06e-05	3.42	72.54
[R].LNIIIVAEGAIDK.[N]			3.58862e-05	9.16411e-05	1	3	2	P08237	P08237 [257-269]			ATP-dependent 6-phosphofructokinase, muscle type OS=Homo sapiens OX=9606 GN=PFKM PE=1 SV=2	P08237-2; P08237; P08237-3	0	1368.81		225462				388193		72265.1		Not Found	High	Not Found	Not Found	Not Found	High	Not Found	Peak Found	High	3.781e-05	3.906e-06	3.27	78.69
[R].LNIIIVAEGAIDTQNKPITSEK.[I]			2.62309e-06	9.16411e-05	1	2	1	Q01813	Q01813 [266-287]			ATP-dependent 6-phosphofructokinase, platelet type OS=Homo sapiens OX=9606 GN=PFKP PE=1 SV=2	Q01813; Q01813-2	0	2367.31						527218				Not Found	Not Found	Not Found	Not Found	Not Found	High	Not Found	Not Found	High	3.781e-05	1.821e-07	5.81	73.22
[R].LNLNNTVLSK.[R]			0.000460137	9.16411e-05	1	1	8	P07814	P07814 [426-435]			Bifunctional glutamate/proline--tRNA ligase OS=Homo sapiens OX=9606 GN=EPRS1 PE=1 SV=5	P07814	0	1115.64	1.01048e+06	1.49732e+06	3.73001e+06	1.34149e+06	1.15571e+06	661592	513846	420239		High	High	High	Peak Found	High	High	High	Peak Found	High	3.781e-05	7.76e-05	2.94	51.66
[R].LNIPVSQVNPR.[D]			5.74041e-05	9.16411e-05	1	6	14	P05023	P05023 [648-658]			Sodium/potassium-transporting ATPase subunit alpha-1 OS=Homo sapiens OX=9606 GN=ATP1A1 PE=1 SV=1	P13637-3; P13637-2; P05023; P05023-4; P05023-3; P13637	0	1236.71	1.1375e+06	2.57263e+07	1.18132e+06	2.84859e+07	497068	1.2968e+07		9.36276e+06		High	High	High	High	High	High	Not Found	High	High	3.781e-05	6.772e-06	2.64	53.38
[K].INISQVIAVVGQQNVEGK.[R]			6.00672e-08	9.16411e-05	1	1	7	P24928	P24928 [779-796]			DNA-directed RNA polymerase II subunit RPB1 OS=Homo sapiens OX=9606 GN=POLR2A PE=1 SV=2	P24928	0	1896.05			239411		814622		408310			High	Not Found	High	Not Found	High	Not Found	High	Not Found	High	3.781e-05	2.198e-09	3.79	79.12
[K].LNIVISPYHFDNSWK.[A]			1.70135e-06	9.16411e-05	1	3	4	Q149N8	Q149N8 [99-113]			E3 ubiquitin-protein ligase SHPRH OS=Homo sapiens OX=9606 GN=SHPRH PE=1 SV=2	Q149N8; Q149N8-5; Q149N8-4	0	1832.93			396247		114731		244564			High	Not Found	High	Not Found	High	Not Found	High	Not Found	High	3.781e-05	1.099e-07	4.11	70.22
[K].INNLNVEENSSGDQR.[R]			2.02675e-06	9.16411e-05	1	2	2	Q9Y5V3	Q9Y5V3 [252-266]			Melanoma-associated antigen D1 OS=Homo sapiens OX=9606 GN=MAGED1 PE=1 SV=3	Q9Y5V3; Q9Y5V3-2	0	1688.78									No Quan Values	Not Found	Not Found	Not Found	High	Not Found	Not Found	Not Found	High	High	3.781e-05	1.352e-07	3.6
[R].INLIDLAGSER.[C]			4.73082e-05	9.16411e-05	1	1	4	Q15058	Q15058 [599-609]			Kinesin-like protein KIF14 OS=Homo sapiens OX=9606 GN=KIF14 PE=1 SV=1	Q15058	0	1200.66	608286		1.40109e+06		645173		798180			High	Not Found	High	Not Found	High	Not Found	High	Not Found	High	3.781e-05	5.381e-06	3.16	68.2
[K].INFDMSSLVVSLAHGAVIYATK.[G]	1xOxidation [M5]	1xOxidation [M5]	5.04231e-08	9.16411e-05	1	1	3	O95602	O95602 [1536-1557]			DNA-directed RNA polymerase I subunit RPA1 OS=Homo sapiens OX=9606 GN=POLR1A PE=1 SV=2	O95602	0	2352.23	923908		1.47283e+06		563298		557082			High	Not Found	Peak Found	Not Found	High	Not Found	Peak Found	Not Found	High	3.781e-05	1.792e-09	6.78	82.56
[R].LNTLASLGYAVVVIDGR.[G]			5.13733e-07	9.16411e-05	1	3	3	Q86TI2	Q86TI2 [664-680]			Dipeptidyl peptidase 9 OS=Homo sapiens OX=9606 GN=DPP9 PE=1 SV=3	Q86TI2-2; Q86TI2; Q86TI2-4	0	1760.99				267267						Not Found	Not Found	Not Found	High	Not Found	High	Not Found	High	High	3.781e-05	2.696e-08	3.69	85.07
[R].LNTICAQVIPFLSQEHQQQVAQAVER.[A]	1xCarbamidomethyl [C5]; 1xDeamidated [Q22]	1xCarbamidomethyl [C5]; 1xDeamidated [Q14; Q22]	3.42709e-05	9.16411e-05	1	1	1	Q04724	Q04724 [85-110]			Transducin-like enhancer protein 1 OS=Homo sapiens OX=9606 GN=TLE1 PE=1 SV=2	Q04724	0	3008.53									No Quan Values	Not Found	Not Found	Not Found	High	Not Found	Not Found	Not Found	Not Found	High	3.781e-05	3.688e-06	5.48
[K].LPEEKEETIPK.[A]			6.23656e-05	9.16411e-05	1	1	1	Q9H583	Q9H583 [1473-1483]			HEAT repeat-containing protein 1 OS=Homo sapiens OX=9606 GN=HEATR1 PE=1 SV=3	Q9H583	1	1312.7					258773					Not Found	Not Found	Not Found	Not Found	High	Not Found	Not Found	Not Found	High	3.781e-05	7.424e-06	2.91	36.75
[K].LPEEVATPTTDEEK.[D]			1.86505e-07	9.16411e-05	1	1	4	O95602	O95602 [351-364]			DNA-directed RNA polymerase I subunit RPA1 OS=Homo sapiens OX=9606 GN=POLR1A PE=1 SV=2	O95602	0	1558.75	1558625		2.2047e+06		1.00406e+06		472335			High	Not Found	High	Not Found	High	Not Found	High	Not Found	High	3.781e-05	8.255e-09	4.06	46.83
[K].LPEEVATPTTDEEKDSLIAIDR.[S]			9.43087e-09	9.16411e-05	1	1	7	O95602	O95602 [351-372]			DNA-directed RNA polymerase I subunit RPA1 OS=Homo sapiens OX=9606 GN=POLR1A PE=1 SV=2	O95602	1	2442.22	5.37243e+06		5.62947e+06		3180000		2.13326e+06			High	Not Found	High	Not Found	High	Not Found	High	Not Found	High	3.781e-05	2.515e-10	7.36	63.81
[R].LPEGEALQCLTER.[A]	1xCarbamidomethyl [C9]	1xCarbamidomethyl [C9]	7.63593e-06	9.16411e-05	3	10	4	P29375; P41229; Q9BY66	P29375 [1240-1252]; P41229 [1272-1284]; Q9BY66 [1259-1271]			Lysine-specific demethylase 5A OS=Homo sapiens OX=9606 GN=KDM5A PE=1 SV=3 Lysine-specific demethylase 5C OS=Homo sapiens OX=9606 GN=KDM5C PE=1 SV=2 Lysine-specific demethylase 5D OS=Homo sapiens OX=9606 GN=KDM5D PE=1 SV=2	Q9BY66-2; P29375-2; P29375; P41229-5; P41229-3; P41229; Q9BY66; Q9BY66-3; P41229-2; P41229-4	0	1515.75	320178		1.05273e+06		402970		376315		Shared	High	Not Found	High	Not Found	High	Not Found	High	Not Found	High	3.781e-05	6.373e-07	2.68	60.66
[K].LPEIEEYYDGNTSSNSR.[Q]			1.12319e-09	9.16411e-05	1	1	4	Q9BQ39	Q9BQ39 [661-677]			ATP-dependent RNA helicase DDX50 OS=Homo sapiens OX=9606 GN=DDX50 PE=1 SV=1	Q9BQ39	0	1973.87		975439				950219		304886		Not Found	High	Not Found	Not Found	Not Found	High	Not Found	High	High	3.781e-05	2.064e-11	5.05	60.59
[K].LPENYTDETWQK.[L]			3.58779e-06	9.16411e-05	1	3	7	Q13620-1	Q13620-1 [190-201]			Isoform 2 of Cullin-4B OS=Homo sapiens OX=9606 GN=CUL4B	Q13620-1; Q13620; Q13620-3	0	1523.7	46913.6	2.19688e+06		1.89598e+06		978220	22470.2	1.32406e+06		Peak Found	High	Not Found	High	Not Found	High	Peak Found	High	High	3.781e-05	2.644e-07	3.95	52.08
[R].IPEPQKPQLKPPEDIVR.[S]			1.8151e-05	9.16411e-05	1	2	5	Q07157-2	Q07157-2 [1246-1262]			Isoform Short of Tight junction protein ZO-1 OS=Homo sapiens OX=9606 GN=TJP1	Q07157-2; Q07157	0	1984.12	510181		1.788e+06		1.40756e+06		357508			High	Not Found	High	Not Found	High	Not Found	High	Not Found	High	3.781e-05	1.761e-06	3.46	49.75
[R].IPFNQALVFSNLHSR.[A]			2.39283e-05	9.16411e-05	1	1	4	Q9UHI6	Q9UHI6 [307-321]			Probable ATP-dependent RNA helicase DDX20 OS=Homo sapiens OX=9606 GN=DDX20 PE=1 SV=2	Q9UHI6	0	1742.93		875249		628053		425385				Not Found	High	Not Found	High	Not Found	High	Not Found	High	High	3.781e-05	2.422e-06	5.08	65.41
[R].IPFYMSTDCENLLK.[KR]	1xCarbamidomethyl [C9]; 1xOxidation [M5]	1xCarbamidomethyl [C9]; 1xOxidation [M5]	0.000252897	9.16411e-05	3	26	1	Q9P0L2; P27448; Q7KZI7-16	Q9P0L2 [276-289]; P27448 [272-285]; Q7KZI7-16 [269-282]			Serine/threonine-protein kinase MARK1 OS=Homo sapiens OX=9606 GN=MARK1 PE=1 SV=2 MAP/microtubule affinity-regulating kinase 3 OS=Homo sapiens OX=9606 GN=MARK3 PE=1 SV=5 Isoform 16 of Serine/threonine-protein kinase MARK2 OS=Homo sapiens OX=9606 GN=MARK2	Q7KZI7-6; P27448-7; Q7KZI7-3; P27448-3; Q9P0L2; Q9P0L2-3; Q7KZI7; Q7KZI7-15; Q7KZI7-11; Q7KZI7-2; Q7KZI7-5; P27448-6; Q7KZI7-10; P27448; P27448-8; Q7KZI7-4; Q7KZI7-8; P27448-2; P27448-4; Q7KZI7-14; Q7KZI7-7; Q7KZI7-13; Q7KZI7-9; Q9P0L2-2; Q7KZI7-12; Q7KZI7-16	0	1746.81									No Quan Values	Not Found	Not Found	Not Found	Not Found	Not Found	High	Not Found	Not Found	High	3.781e-05	3.852e-05	2.97
[K].IPEDQHALLVK.[Y]			7.36122e-05	9.16411e-05	1	2	6	O94874	O94874 [720-730]			E3 UFM1-protein ligase 1 OS=Homo sapiens OX=9606 GN=UFL1 PE=1 SV=2	O94874; O94874-2	0	1262.71		7.54585e+06	53139.7	5.48955e+06		2.46123e+06		5.04125e+06		Not Found	High	Peak Found	High	Not Found	High	Not Found	High	High	3.781e-05	9.093e-06	3.1	43.4
[R].LPGEAPVIQR.[L]			0.000386287	9.16411e-05	1	3	4	Q92538	Q92538 [791-800]			Golgi-specific brefeldin A-resistance guanine nucleotide exchange factor 1 OS=Homo sapiens OX=9606 GN=GBF1 PE=1 SV=2	Q92538; Q92538-2; Q92538-3	0	1079.62	2.95248e+06		2.29111e+06		1.56965e+06		768461			High	Not Found	High	Not Found	High	Not Found	High	Not Found	High	3.781e-05	6.331e-05	2.13	47.01
[R].LPGLGEPEVEYETLK.[D]			5.27997e-08	9.16411e-05	1	3	5	Q9HCM4	Q9HCM4 [489-503]			Band 4.1-like protein 5 OS=Homo sapiens OX=9606 GN=EPB41L5 PE=1 SV=3	Q9HCM4-4; Q9HCM4-3; Q9HCM4	0	1673.86		2.0685e+06		624784		1.95383e+06		2.90759e+06		Not Found	High	Not Found	High	Not Found	High	Not Found	High	High	3.781e-05	1.878e-09	4.13	68.34
[R].LPGLGEPEVEYETLKDTSEK.[L]			4.90488e-08	9.16411e-05	1	3	3	Q9HCM4	Q9HCM4 [489-508]			Band 4.1-like protein 5 OS=Homo sapiens OX=9606 GN=EPB41L5 PE=1 SV=3	Q9HCM4-4; Q9HCM4-3; Q9HCM4	1	2234.11		1.26947e+06								Not Found	High	Not Found	High	Not Found	High	Not Found	Not Found	High	3.781e-05	1.735e-09	6.69	63.77
[R].LPGLIDVHVHLR.[E]			0.000304041	9.16411e-05	1	1	3	P27708	P27708 [1464-1475]			CAD protein OS=Homo sapiens OX=9606 GN=CAD PE=1 SV=3	P27708	0	1368.81	181491		856599		276345					Peak Found	Not Found	High	Not Found	High	Not Found	High	Not Found	High	3.781e-05	4.796e-05	3.9	58.48
[K].IPGIIIAASAVR.[A]			4.81771e-06	9.16411e-05	1	1	6	P33992	P33992 [151-162]			DNA replication licensing factor MCM5 OS=Homo sapiens OX=9606 GN=MCM5 PE=1 SV=5	P33992	0	1180.74	99099.3	22229532	136671	3.65971e+06		11010346		9654195		High	High	Peak Found	High	Not Found	High	Not Found	High	High	3.781e-05	3.718e-07	3.4	67.23
[R].IPGLLSPHPLLQLSYTATDR.[H]			3.93204e-08	9.16411e-05	1	1	4	P49327	P49327 [1256-1275]			Fatty acid synthase OS=Homo sapiens OX=9606 GN=FASN PE=1 SV=3	P49327	0	2192.21	621786		1555728		1.01162e+06		427747			High	Not Found	High	Not Found	High	Not Found	High	Not Found	High	3.781e-05	1.34e-09	7.12	74.55
[R].IPGVNKEEETESR.[E]			0.000490769	9.16411e-05	1	1	5	O60318	O60318 [390-402]			Germinal-center associated nuclear protein OS=Homo sapiens OX=9606 GN=MCM3AP PE=1 SV=2	O60318	1	1487.73	165761		277451		653491		81003.9			High	Not Found	High	Not Found	High	Not Found	High	Not Found	High	3.781e-05	8.338e-05	3.28	32.97
[K].LPHIIGGSDLIAHHAR.[K]			1.42853e-05	9.16411e-05	1	1	1	O60934	O60934 [699-714]			Nibrin OS=Homo sapiens OX=9606 GN=NBN PE=1 SV=1	O60934	0	1706.94		1062837		443747						Not Found	High	Not Found	Peak Found	Not Found	Not Found	Not Found	Not Found	High	3.781e-05	1.331e-06	4.56	45.84
[K].IPHLISSVLLR.[S]			0.000252897	9.16411e-05	1	4	1	Q6YHU6	Q6YHU6 [269-279]			Thyroid adenoma-associated protein OS=Homo sapiens OX=9606 GN=THADA PE=1 SV=1	Q6YHU6-5; Q6YHU6-3; Q6YHU6; Q6YHU6-6	0	1247.78									No Quan Values	Not Found	Not Found	Not Found	Not Found	Not Found	Not Found	High	Not Found	High	3.781e-05	3.844e-05	3.02
[K].LPHLWDAMVGPLR.[N]	1xOxidation [M8]	1xOxidation [M8]	2.93035e-05	9.16411e-05	1	1	5	O14981	O14981 [1046-1058]			TATA-binding protein-associated factor 172 OS=Homo sapiens OX=9606 GN=BTAF1 PE=1 SV=2	O14981	0	1520.8	577727		742243		295666		410800			High	Not Found	High	Not Found	High	Not Found	High	Not Found	High	3.781e-05	3.071e-06	3.37	65.8
[K].LPGGVQNFPQFSALR.[F]			3.18363e-05	9.16411e-05	1	3	3	Q7Z6Z7	Q7Z6Z7 [1226-1240]			E3 ubiquitin-protein ligase HUWE1 OS=Homo sapiens OX=9606 GN=HUWE1 PE=1 SV=3	Q7Z6Z7-2; Q7Z6Z7; Q7Z6Z7-3	0	1630.87		301415	288978		147408					High	Peak Found	High	Not Found	High	Not Found	Not Found	Not Found	High	3.781e-05	3.408e-06	3.48	71.44
[R].LNTICAQVIPFLSQEHQQQVAQAVER.[A]	1xCarbamidomethyl [C5]	1xCarbamidomethyl [C5]	1.81332e-09	9.16411e-05	1	1	6	Q04724	Q04724 [85-110]			Transducin-like enhancer protein 1 OS=Homo sapiens OX=9606 GN=TLE1 PE=1 SV=2	Q04724	0	3007.54		1.66234e+06		807333				752371		Not Found	High	Not Found	High	Not Found	High	Not Found	High	High	3.781e-05	3.629e-11	5.19	72.13
[K].LPEDPLLSGLLDSPALK.[A]			9.87295e-10	9.16411e-05	1	1	6	P49327	P49327 [1209-1225]			Fatty acid synthase OS=Homo sapiens OX=9606 GN=FASN PE=1 SV=3	P49327	0	1777.99									No Quan Values	High	Not Found	High	Not Found	High	Not Found	High	Not Found	High	3.781e-05	1.78e-11	4.76
[K].LPDYSSIEIMR.[E]			3.18363e-05	9.16411e-05	2	4	3	Q14669-2; Q14669	Q14669-2 [1998-2008]; Q14669 [1965-1975]			Isoform 2 of E3 ubiquitin-protein ligase TRIP12 OS=Homo sapiens OX=9606 GN=TRIP12 E3 ubiquitin-protein ligase TRIP12 OS=Homo sapiens OX=9606 GN=TRIP12 PE=1 SV=1	Q14669-2; Q14669-4; Q14669; Q14669-3	0	1323.66	320610	3.78517e+06	684520	3.86906e+06	257272	2.03352e+06		1.1979e+06	Shared	High	Peak Found	High	Peak Found	High	Peak Found	Not Found	Peak Found	High	3.781e-05	3.403e-06	2.93	69.16
[R].LNTILAQIMPFLSQEHQQQVAQAVER.[A]	1xOxidation [M9]	1xOxidation [M9]	1.5086e-08	9.16411e-05	1	7	5	Q04726-3	Q04726-3 [85-110]			Isoform 3 of Transducin-like enhancer protein 3 OS=Homo sapiens OX=9606 GN=TLE3	Q04726-5; Q04726-3; Q04726-2; Q04726-4; Q04726-7; Q04726-6; Q04726	0	3008.56				691612		510536		693024		Not Found	High	Not Found	High	Not Found	High	Not Found	High	High	3.781e-05	4.352e-10	5.39	77.06
[R].LNTILAQIMPFLSQEHQQQVAQAVER.[A]	1xDeamidated [Q7]; 1xOxidation [M9]	1xDeamidated [N2; Q7; Q14]; 1xOxidation [M9]	9.43781e-06	9.16411e-05	1	7	2	Q04726-3	Q04726-3 [85-110]			Isoform 3 of Transducin-like enhancer protein 3 OS=Homo sapiens OX=9606 GN=TLE3	Q04726-5; Q04726-3; Q04726-2; Q04726-4; Q04726-7; Q04726-6; Q04726	0	3009.55		1.01455e+06								Not Found	High	Not Found	High	Not Found	Not Found	Not Found	Not Found	High	3.781e-05	8.141e-07	2.39	77.03
[K].LNTQEIFDDWAR.[K]			0.000176586	9.16411e-05	1	1	3	Q14204	Q14204 [693-704]			Cytoplasmic dynein 1 heavy chain 1 OS=Homo sapiens OX=9606 GN=DYNC1H1 PE=1 SV=5	Q14204	0	1507.72			369670	114826	303794	51948.5				High	Not Found	High	Peak Found	High	Peak Found	Not Found	Not Found	High	3.781e-05	2.538e-05	2.55	75.38
[R].LNVAFMESK.[R]			0.000623491	9.16411e-05	1	4	4	O95425-2	O95425-2 [957-965]			Isoform 2 of Supervillin OS=Homo sapiens OX=9606 GN=SVIL	O95425-2; O95425; O95425-3; O95425-4	0	1038.53	282174		255443		158877		101337			High	Not Found	High	Not Found	High	Not Found	High	Not Found	High	3.781e-05	0.0001105	1.76	56.6
[K].INVPELPTPDEDNKLEVQK.[V]			3.86216e-06	9.16411e-05	1	2	4	O43264	O43264 [431-449]			Centromere/kinetochore protein zw10 homolog OS=Homo sapiens OX=9606 GN=ZW10 PE=1 SV=3	O43264-2; O43264	1	2178.13		1.90412e+06		1.05604e+06		961525		581666		Not Found	High	Not Found	High	Not Found	High	Not Found	High	High	3.781e-05	2.868e-07	4.25	62.33
[R].INVYYNEATGGK.[Y]			1.7334e-05	9.16411e-05	1	1	5	P68371	P68371 [47-58]			Tubulin beta-4B chain OS=Homo sapiens OX=9606 GN=TUBB4B PE=1 SV=1	P68371	0	1328.65	143394		568421	522692		452983				High	Not Found	High	High	High	High	Not Found	Not Found	High	3.781e-05	1.663e-06	2.72	46.77
[R].LPAAGGGAAGEPLK.[L]			3.55571e-05	9.16411e-05	1	1	4	Q2Q1W2	Q2Q1W2 [75-88]			E3 ubiquitin-protein ligase TRIM71 OS=Homo sapiens OX=9606 GN=TRIM71 PE=1 SV=1	Q2Q1W2	0	1208.66				595325		220071				Not Found	High	Not Found	High	Not Found	High	Not Found	High	High	3.781e-05	3.882e-06	3.25	42.49
[K].IPALDLLIK.[L]			0.000193622	9.16411e-05	1	2	4	P78527	P78527 [125-133]			DNA-dependent protein kinase catalytic subunit OS=Homo sapiens OX=9606 GN=PRKDC PE=1 SV=3	P78527-2; P78527	0	995.65	105393	234255	426584	221446	228427	87298.3	262507	50677.1		High	Peak Found	High	Peak Found	High	Peak Found	High	Peak Found	High	3.781e-05	2.813e-05	2.89	76.45
[K].LPAPLPGLQDGEVEGHPVWALIYYCMR.[C]	1xCarbamidomethyl [C25]; 1xOxidation [M26]	1xCarbamidomethyl [C25]; 1xOxidation [M26]	6.40994e-06	9.16411e-05	1	2	4	Q8N1F7	Q8N1F7 [301-327]			Nuclear pore complex protein Nup93 OS=Homo sapiens OX=9606 GN=NUP93 PE=1 SV=2	Q8N1F7-2; Q8N1F7	0	3097.53		974528		1.02081e+06				474197		Not Found	High	Not Found	High	Not Found	High	Not Found	High	High	3.781e-05	5.202e-07	5.04	85.92
[R].LPEDEPAPAAPLR.[G]			2.85048e-05	9.16411e-05	1	2	4	Q9UJ14	Q9UJ14 [30-42]			Glutathione hydrolase 7 OS=Homo sapiens OX=9606 GN=GGT7 PE=1 SV=2	Q9UJ14-5; Q9UJ14	0	1375.72		1.00339e+06		556881	49201.5	456647		435546		Not Found	High	Not Found	High	Peak Found	High	Not Found	High	High	3.781e-05	2.978e-06	2.97	51.33
[K].LPATEKPVLLSK.[D]			0.000262387	9.16411e-05	1	1	2	Q9Y4L1	Q9Y4L1 [878-889]			Hypoxia up-regulated protein 1 OS=Homo sapiens OX=9606 GN=HYOU1 PE=1 SV=1	Q9Y4L1	0	1295.79	71637.4			391529						Peak Found	Not Found	High	High	Not Found	Not Found	Not Found	Not Found	High	3.781e-05	4.025e-05	3.33	44.28
[R].LPDDDPTAVAGSFSCTMK.[F]	1xCarbamidomethyl [C15]; 1xOxidation [M17]	1xCarbamidomethyl [C15]; 1xOxidation [M17]	5.58274e-06	9.16411e-05	1	1	5	Q9UBF2	Q9UBF2 [709-726]			Coatomer subunit gamma-2 OS=Homo sapiens OX=9606 GN=COPG2 PE=1 SV=1	Q9UBF2	0	1927.84				473551		285173		436012		Not Found	High	Not Found	High	Not Found	High	Not Found	High	High	3.781e-05	4.411e-07	3.74	61.73
[K].LPDFQDSIFEYFNTAPLAHDLTFR.[T]			8.53008e-05	9.16411e-05	1	1	1	Q9Y5S2	Q9Y5S2 [944-967]			Serine/threonine-protein kinase MRCK beta OS=Homo sapiens OX=9606 GN=CDC42BPB PE=1 SV=2	Q9Y5S2	0	2857.38									No Quan Values	Not Found	Not Found	Not Found	Not Found	High	Not Found	Not Found	Not Found	High	3.781e-05	1.073e-05	4.8
[K].IPDHDPAPNVTVLLR.[E]			3.12402e-07	9.16411e-05	2	2	5	Q9P2E9-3; Q9P2E9	Q9P2E9-3 [83-97]; Q9P2E9 [83-97]			Isoform 2 of Ribosome-binding protein 1 OS=Homo sapiens OX=9606 GN=RRBP1 Ribosome-binding protein 1 OS=Homo sapiens OX=9606 GN=RRBP1 PE=1 SV=5	Q9P2E9-3; Q9P2E9	0	1656.91	872019		1626921		844591		826506		Shared	High	Not Found	High	Not Found	High	Not Found	High	Not Found	High	3.781e-05	1.51e-08	4.71	61.27
[K].LPDIFSVYFR.[R]			0.000173363	9.16411e-05	2	4	4	Q14669-2; Q14669	Q14669-2 [946-955]; Q14669 [913-922]			Isoform 2 of E3 ubiquitin-protein ligase TRIP12 OS=Homo sapiens OX=9606 GN=TRIP12 E3 ubiquitin-protein ligase TRIP12 OS=Homo sapiens OX=9606 GN=TRIP12 PE=1 SV=1	Q14669-2; Q14669-4; Q14669; Q14669-3	0	1256.67	199346		464944		133165		153849		Shared	High	Not Found	High	Not Found	High	Not Found	High	Not Found	High	3.781e-05	2.473e-05	2.4	86.41
[K].LPDMLNAEIVLGNVQNAK.[D]			2.82299e-07	9.16411e-05	1	1	3	O75643	O75643 [897-914]			U5 small nuclear ribonucleoprotein 200 kDa helicase OS=Homo sapiens OX=9606 GN=SNRNP200 PE=1 SV=2	O75643	0	1939.03			392761		95352.4					Not Found	Not Found	High	Not Found	High	Not Found	Not Found	Not Found	High	3.781e-05	1.345e-08	4.65	81.22
[K].LPDMLNAEIVLGNVQNAK.[D]	1xDeamidated [N13]	1xDeamidated [N13]	5.95585e-05	9.16411e-05	1	1	1	O75643	O75643 [897-914]			U5 small nuclear ribonucleoprotein 200 kDa helicase OS=Homo sapiens OX=9606 GN=SNRNP200 PE=1 SV=2	O75643	0	1940.02									No Quan Values	Not Found	Not Found	Not Found	Not Found	High	Not Found	Not Found	Not Found	High	3.781e-05	7.091e-06	4.43
[K].LPDMLNAEIVLGNVQNAK.[D]	1xOxidation [M4]	1xOxidation [M4]	1.15494e-08	9.16411e-05	1	1	4	O75643	O75643 [897-914]			U5 small nuclear ribonucleoprotein 200 kDa helicase OS=Homo sapiens OX=9606 GN=SNRNP200 PE=1 SV=2	O75643	0	1955.03			694584							Not Found	Not Found	High	Not Found	High	Not Found	Not Found	Not Found	High	3.781e-05	3.17e-10	4.92	73.73
[R].LPDNYTQDTWR.[K]			4.39475e-05	9.16411e-05	1	1	8	Q13619	Q13619 [54-64]			Cullin-4A OS=Homo sapiens OX=9606 GN=CUL4A PE=1 SV=3	Q13619	0	1408.65		4402997		3.20572e+06		2771589		1.67323e+06		Not Found	High	Not Found	High	Not Found	High	Not Found	High	High	3.781e-05	4.949e-06	3.28	53.75
[K].IPDPDSDDVSEVDAR.[H]			2.00768e-07	9.16411e-05	2	5	5	P51532; P51532-4	P51532 [690-704]; P51532-4 [690-704]			Transcription activator BRG1 OS=Homo sapiens OX=9606 GN=SMARCA4 PE=1 SV=2 Isoform 4 of Transcription activator BRG1 OS=Homo sapiens OX=9606 GN=SMARCA4	P51532; P51532-5; P51532-2; P51532-4; P51532-3	0	1629.72	693686		1166450		266236		108887		Shared	High	Not Found	High	Not Found	High	Not Found	High	Not Found	High	3.781e-05	9.034e-09	2.56	51.83
[R].LPDDDPTAVAGSFSCTMK.[F]	1xCarbamidomethyl [C15]	1xCarbamidomethyl [C15]	8.92159e-10	9.16411e-05	1	1	1	Q9UBF2	Q9UBF2 [709-726]			Coatomer subunit gamma-2 OS=Homo sapiens OX=9606 GN=COPG2 PE=1 SV=1	Q9UBF2	0	1911.85			120019		199883			257120		Not Found	Not Found	Peak Found	Not Found	Peak Found	Not Found	Not Found	High	High	3.781e-05	1.577e-11	4.48	66.26
[K].LITSVADVVNNDPMVGSK.[L]			5.84588e-06	9.16411e-05	1	2	3	P06737	P06737 [623-640]			Glycogen phosphorylase, liver form OS=Homo sapiens OX=9606 GN=PYGL PE=1 SV=4	P06737-2; P06737	0	1858.96								244539		Not Found	Not Found	Not Found	High	Not Found	Not Found	Not Found	High	High	3.781e-05	4.662e-07	3.75	70.22
[K].LNETISTLQQAILK.[I]			1.05409e-05	9.16411e-05	1	3	5	Q5T5Y3	Q5T5Y3 [1027-1040]			Calmodulin-regulated spectrin-associated protein 1 OS=Homo sapiens OX=9606 GN=CAMSAP1 PE=1 SV=2	Q5T5Y3-2; Q5T5Y3; Q5T5Y3-3	0	1571.9	523483		499457		291458		199298			High	Not Found	High	Not Found	High	Not Found	High	Not Found	High	3.781e-05	9.351e-07	3.53	71.8
[K].LNESTFDTQITK.[K]			3.68917e-05	9.16411e-05	1	2	6	P78527	P78527 [1858-1869]			DNA-dependent protein kinase catalytic subunit OS=Homo sapiens OX=9606 GN=PRKDC PE=1 SV=3	P78527-2; P78527	0	1396.7	2.47994e+06		3.41778e+06		1.39639e+06		373536			High	Not Found	High	Not Found	High	Not Found	High	Not Found	High	3.781e-05	4.02e-06	3.5	51.76
[R].ILYEEVDESEVEVIHVPSPALEER.[K]			8.44813e-07	9.16411e-05	1	3	4	Q86TI2	Q86TI2 [275-298]			Dipeptidyl peptidase 9 OS=Homo sapiens OX=9606 GN=DPP9 PE=1 SV=3	Q86TI2-2; Q86TI2; Q86TI2-4	0	2781.38		1.50031e+06		833915		438327		723548		Not Found	High	Not Found	High	Not Found	High	Not Found	High	High	3.781e-05	4.861e-08	5.36	74.37
[K].LLYELVSIPK.[L]			0.000264815	9.16411e-05	1	1	4	Q14997	Q14997 [101-110]			Proteasome activator complex subunit 4 OS=Homo sapiens OX=9606 GN=PSME4 PE=1 SV=2	Q14997	0	1174.71	329406		625049		323664		161199			High	Not Found	High	Not Found	High	Not Found	High	Not Found	High	3.781e-05	4.048e-05	2.65	72.83
[R].IIYFADAELLK.[D]			0.000218248	9.16411e-05	2	4	3	Q14669-2; Q14669	Q14669-2 [898-908]; Q14669 [865-875]			Isoform 2 of E3 ubiquitin-protein ligase TRIP12 OS=Homo sapiens OX=9606 GN=TRIP12 E3 ubiquitin-protein ligase TRIP12 OS=Homo sapiens OX=9606 GN=TRIP12 PE=1 SV=1	Q14669-2; Q14669-4; Q14669; Q14669-3	0	1295.72	505841		745694		259810				Shared	High	Not Found	High	Not Found	High	Not Found	Not Found	Not Found	High	3.781e-05	3.253e-05	2.31	75.36
[R].IIYFADAELLKDVLK.[N]			1.19859e-07	9.16411e-05	2	4	2	Q14669-2; Q14669	Q14669-2 [898-912]; Q14669 [865-879]			Isoform 2 of E3 ubiquitin-protein ligase TRIP12 OS=Homo sapiens OX=9606 GN=TRIP12 E3 ubiquitin-protein ligase TRIP12 OS=Homo sapiens OX=9606 GN=TRIP12 PE=1 SV=1	Q14669-2; Q14669-4; Q14669; Q14669-3	1	1751									No Quan Values	High	Not Found	High	Not Found	Not Found	Not Found	Not Found	Not Found	High	3.781e-05	4.926e-09	3.77
[K].ILYGHSGPVYGASFSPDR.[LN]			0.000646876	9.16411e-05	1	2	2	Q15542	Q15542 [538-555]			Transcription initiation factor TFIID subunit 5 OS=Homo sapiens OX=9606 GN=TAF5 PE=1 SV=3	Q15542-2; Q15542	0	1922.94								203948		Not Found	Not Found	Not Found	Not Found	Not Found	High	Not Found	High	High	3.781e-05	0.0001153	3.37	54.26
[K].IIYHLDGQETPYLVK.[L]			0.000168638	9.16411e-05	1	2	3	Q92997	Q92997 [6-20]			Segment polarity protein dishevelled homolog DVL-3 OS=Homo sapiens OX=9606 GN=DVL3 PE=1 SV=2	Q92997; Q92997-2	0	1788.95		453808		443119		182017		333465		Not Found	High	Not Found	High	Not Found	Peak Found	Not Found	High	High	3.781e-05	2.388e-05	3.64	59.55
[K].ILYLLNQGEHFGTTEATEAFFAMTR.[L]	1xOxidation [M23]	1xOxidation [M23]	1.50934e-06	9.16411e-05	1	2	4	Q9UBF2	Q9UBF2 [51-75]			Coatomer subunit gamma-2 OS=Homo sapiens OX=9606 GN=COPG2 PE=1 SV=1	Q9UBF2-2; Q9UBF2	0	2876.39		1.12831e+06		532451		170697		317464		Not Found	High	Not Found	High	Not Found	High	Not Found	High	High	3.781e-05	9.554e-08	5.22	80.28
[K].ILYLLNQGEHFGTTEATEAFFAMTR.[L]	1xDeamidated [N6]; 1xOxidation [M23]	1xDeamidated [N6]; 1xOxidation [M23]	3.39567e-05	9.16411e-05	1	2	1	Q9UBF2	Q9UBF2 [51-75]			Coatomer subunit gamma-2 OS=Homo sapiens OX=9606 GN=COPG2 PE=1 SV=1	Q9UBF2-2; Q9UBF2	0	2877.38									No Quan Values	Not Found	Not Found	Not Found	Not Found	Not Found	Not Found	Not Found	High	High	3.781e-05	3.652e-06	3.82
[K].LLYLWTSSHTNSVPGTVTK.[K]			0.000239302	9.16411e-05	1	1	1	O00443	O00443 [808-826]			Phosphatidylinositol 4-phosphate 3-kinase C2 domain-containing subunit alpha OS=Homo sapiens OX=9606 GN=PIK3C2A PE=1 SV=2	O00443	0	2104.11	72214		465493							Peak Found	Not Found	High	Not Found	Not Found	Not Found	Not Found	Not Found	High	3.781e-05	3.616e-05	3.94	62
[K].ILYDILAFAK.[E]			0.000327286	9.16411e-05	1	2	4	Q8IXB1	Q8IXB1 [439-448]			DnaJ homolog subfamily C member 10 OS=Homo sapiens OX=9606 GN=DNAJC10 PE=1 SV=2	Q8IXB1-2; Q8IXB1	0	1166.68		2.04185e+06		1.65529e+06		1370219		776767		Not Found	High	Not Found	High	Not Found	High	Not Found	High	High	3.781e-05	5.228e-05	2.55	82
[R].LLYNLEMEQMAK.[T]	2xOxidation [M7; M10]	2xOxidation [M7; M10]	3.4588e-05	9.16411e-05	2	2	6	Q9Y6D5; Q9Y6D6	Q9Y6D5 [854-865]; Q9Y6D6 [909-920]			Brefeldin A-inhibited guanine nucleotide-exchange protein 2 OS=Homo sapiens OX=9606 GN=ARFGEF2 PE=1 SV=3 Brefeldin A-inhibited guanine nucleotide-exchange protein 1 OS=Homo sapiens OX=9606 GN=ARFGEF1 PE=1 SV=2	Q9Y6D5; Q9Y6D6	0	1514.72	1.38151e+06		1.17509e+06		602944		526923		Shared	High	Not Found	High	Not Found	High	Not Found	High	Not Found	High	3.781e-05	3.742e-06	2.62	53.89
[K].LLYPLGGQTNLR.[I]			0.000109385	9.16411e-05	1	2	4	Q5SRE5	Q5SRE5 [501-512]			Nucleoporin NUP188 homolog OS=Homo sapiens OX=9606 GN=NUP188 PE=1 SV=1	Q5SRE5; Q5SRE5-2	0	1344.76	686849		10093395		1.67623e+06		491700			High	Not Found	High	Not Found	High	Not Found	High	Not Found	High	3.781e-05	1.441e-05	2.23	62.68
[K].LLYSIGANVSAEK.[V]			6.65192e-05	9.16411e-05	1	3	4	A3KMH1	A3KMH1 [277-289]			von Willebrand factor A domain-containing protein 8 OS=Homo sapiens OX=9606 GN=VWA8 PE=1 SV=2	A3KMH1; A3KMH1-3; A3KMH1-2	0	1364.74	176960		375507		214677		176034			High	Not Found	High	Not Found	High	Not Found	High	Not Found	High	3.781e-05	8.061e-06	3.22	57.73
[K].ILYSWGELLGK.[W]			2.28512e-05	9.16411e-05	1	4	5	Q5R372	Q5R372 [509-519]			Rab GTPase-activating protein 1-like OS=Homo sapiens OX=9606 GN=RABGAP1L PE=1 SV=1	Q5R372-3; Q5R372-2; Q5R372-4; Q5R372	0	1278.71	20114.2	288524	47098.2	248841		179903	47618.9	142383		Peak Found	High	Peak Found	Peak Found	Not Found	High	Peak Found	High	High	3.781e-05	2.297e-06	1.93	78.2
[R].LMAEDEEGYR.[K]	1xOxidation [M2]	1xOxidation [M2]	0.000640949	9.16411e-05	3	7	4	P51532; P51531; P51532-4	P51532 [530-539]; P51531 [506-515]; P51532-4 [530-539]			Transcription activator BRG1 OS=Homo sapiens OX=9606 GN=SMARCA4 PE=1 SV=2 Probable global transcription activator SNF2L2 OS=Homo sapiens OX=9606 GN=SMARCA2 PE=1 SV=2 Isoform 4 of Transcription activator BRG1 OS=Homo sapiens OX=9606 GN=SMARCA4	P51532; P51531-2; P51532-5; P51531; P51532-2; P51532-4; P51532-3	0	1228.52	537098		647040		266330		142185		Shared	High	Not Found	High	Not Found	High	Not Found	High	Not Found	High	3.781e-05	0.0001138	2.19	37.2
[R].LMAEDEEGYRK.[L]			0.000110397	9.16411e-05	3	7	2	P51532; P51531; P51532-4	P51532 [530-540]; P51531 [506-516]; P51532-4 [530-540]			Transcription activator BRG1 OS=Homo sapiens OX=9606 GN=SMARCA4 PE=1 SV=2 Probable global transcription activator SNF2L2 OS=Homo sapiens OX=9606 GN=SMARCA2 PE=1 SV=2 Isoform 4 of Transcription activator BRG1 OS=Homo sapiens OX=9606 GN=SMARCA4	P51532; P51531-2; P51532-5; P51531; P51532-2; P51532-4; P51532-3	1	1340.62	1.04268e+06		556478						Shared	High	Not Found	High	Not Found	Not Found	Not Found	Not Found	Not Found	High	3.781e-05	1.46e-05	3.68	33.94
[R].LMAEDEEGYRK.[L]	1xOxidation [M2]	1xOxidation [M2]	0.000443499	9.16411e-05	3	7	7	P51532; P51531; P51532-4	P51532 [530-540]; P51531 [506-516]; P51532-4 [530-540]			Transcription activator BRG1 OS=Homo sapiens OX=9606 GN=SMARCA4 PE=1 SV=2 Probable global transcription activator SNF2L2 OS=Homo sapiens OX=9606 GN=SMARCA2 PE=1 SV=2 Isoform 4 of Transcription activator BRG1 OS=Homo sapiens OX=9606 GN=SMARCA4	P51532; P51531-2; P51532-5; P51531; P51532-2; P51532-4; P51532-3	1	1356.61	2.65911e+06		4.04245e+06		1.23588e+06		641388		Shared	High	Not Found	High	Not Found	High	Not Found	High	Not Found	High	3.781e-05	7.415e-05	2.46	30.63
[K].IMAISAGDAYASNK.[A]			7.92413e-05	9.16411e-05	1	2	1	Q99959-2	Q99959-2 [778-791]			Isoform 1 of Plakophilin-2 OS=Homo sapiens OX=9606 GN=PKP2	Q99959; Q99959-2	0	1411.69								212078		Not Found	Not Found	Not Found	Not Found	Not Found	Not Found	Not Found	High	High	3.781e-05	9.862e-06	2.86	51.47
[K].IMAISAGDAYASNK.[A]	1xOxidation [M2]	1xOxidation [M2]	0.00017822	9.16411e-05	1	2	1	Q99959-2	Q99959-2 [778-791]			Isoform 1 of Plakophilin-2 OS=Homo sapiens OX=9606 GN=PKP2	Q99959; Q99959-2	0	1427.68						162774		497380		Not Found	Not Found	Not Found	Not Found	Not Found	Peak Found	Not Found	High	High	3.781e-05	2.54e-05	2.8	45.5
[K].IMAQMSALQK.[N]			0.000159572	9.16411e-05	1	1	2	Q8IWV7	Q8IWV7 [1033-1042]			E3 ubiquitin-protein ligase UBR1 OS=Homo sapiens OX=9606 GN=UBR1 PE=1 SV=1	Q8IWV7	0	1120.59	231821		131067							High	Not Found	High	Not Found	Not Found	Not Found	Not Found	Not Found	High	3.781e-05	2.235e-05	2.36	47.74
[K].LLYNNVSNFGR.[L]			7.16059e-05	9.16411e-05	1	2	5	Q00610	Q00610 [1216-1226]			Clathrin heavy chain 1 OS=Homo sapiens OX=9606 GN=CLTC PE=1 SV=5	Q00610; Q00610-2	0	1296.67	1.22188e+06		11806097	398367	1.73039e+06		897476	228465		High	Not Found	High	Peak Found	High	Not Found	High	Peak Found	High	3.781e-05	8.788e-06	3.03	56.98
[K].IMAQMSALQK.[N]	2xOxidation [M2; M5]	2xOxidation [M2; M5]	0.000382747	9.16411e-05	1	1	4	Q8IWV7	Q8IWV7 [1033-1042]			E3 ubiquitin-protein ligase UBR1 OS=Homo sapiens OX=9606 GN=UBR1 PE=1 SV=1	Q8IWV7	0	1152.58	956343		1023607		420872		251653			High	Not Found	High	Not Found	High	Not Found	High	Not Found	High	3.781e-05	6.224e-05	2.55	32.85
[R].ILVYLVQEINR.[A]			0.000386287	9.16411e-05	1	1	3	Q9Y487	Q9Y487 [64-74]			V-type proton ATPase 116 kDa subunit a isoform 2 OS=Homo sapiens OX=9606 GN=ATP6V0A2 PE=1 SV=2	Q9Y487	0	1359.8		1.34536e+06		547701		276297		211841		Not Found	High	Not Found	High	Not Found	High	Not Found	Peak Found	High	3.781e-05	6.307e-05	3.53	72.37
[K].ILVSLATGAASK.[S]			5.28257e-06	9.16411e-05	1	4	4	Q9Y4F3	Q9Y4F3 [863-874]			Meiosis regulator and mRNA stability factor 1 OS=Homo sapiens OX=9606 GN=MARF1 PE=1 SV=6	Q9Y4F3-4; Q9Y4F3; Q9Y4F3-5; Q9Y4F3-3	0	1130.68	170054		315078		101360		113984			High	Not Found	High	Not Found	High	Not Found	High	Not Found	High	3.781e-05	4.138e-07	2.67	54.12
[K].LLTSVEVDNIEPSAFHR.[Q]			3.09538e-07	9.16411e-05	1	5	1	Q70EL1	Q70EL1 [955-971]			Inactive ubiquitin carboxyl-terminal hydrolase 54 OS=Homo sapiens OX=9606 GN=USP54 PE=1 SV=4	Q70EL1-8; Q70EL1; Q70EL1-10; Q70EL1-7; Q70EL1-9	0	1926.99									No Quan Values	Not Found	Not Found	High	Not Found	Not Found	Not Found	Not Found	Not Found	High	3.781e-05	1.502e-08	3.9
[K].LLTSYGFIQCSER.[Q]	1xCarbamidomethyl [C10]	1xCarbamidomethyl [C10]	1.40245e-05	9.16411e-05	1	4	10	O75534-2	O75534-2 [33-45]			Isoform 2 of Cold shock domain-containing protein E1 OS=Homo sapiens OX=9606 GN=CSDE1	O75534; O75534-4; O75534-3; O75534-2	0	1573.77		8.27177e+06	107942	7.10654e+06		3.7243e+06		2.27081e+06		Not Found	High	Peak Found	High	Not Found	High	Not Found	High	High	3.781e-05	1.307e-06	3.67	63.8
[R].LLTTIGKDLDFEK.[A]			0.000126753	9.16411e-05	3	11	2	O43432; Q04637-8; Q04637-4	O43432 [932-944]; Q04637-8 [939-951]; Q04637-4 [851-863]			Eukaryotic translation initiation factor 4 gamma 3 OS=Homo sapiens OX=9606 GN=EIF4G3 PE=1 SV=2 Isoform 8 of Eukaryotic translation initiation factor 4 gamma 1 OS=Homo sapiens OX=9606 GN=EIF4G1 Isoform C of Eukaryotic translation initiation factor 4 gamma 1 OS=Homo sapiens OX=9606 GN=EIF4G1	Q04637-6; O43432; Q04637-9; O43432-3; Q04637; Q04637-3; Q04637-8; Q04637-4; Q04637-5; Q04637-7; O43432-4	1	1492.83	128595	306532	183011	226053	99881.7	156023			Shared	High	Peak Found	High	Peak Found	Peak Found	Peak Found	Not Found	Not Found	High	3.781e-05	1.71e-05	2.59	60.77
[R].LLTWVIGTGSPR.[L]			4.15846e-05	9.16411e-05	1	1	4	Q92616	Q92616 [1043-1054]			eIF-2-alpha kinase activator GCN1 OS=Homo sapiens OX=9606 GN=GCN1 PE=1 SV=6	Q92616	0	1299.74	258868		648958		333887		164636			High	Not Found	High	Not Found	High	Not Found	High	Not Found	High	3.781e-05	4.657e-06	2.75	70.45
[R].LITYLDQTTQK.[S]			0.000451742	9.16411e-05	1	3	4	Q13620-1	Q13620-1 [410-420]			Isoform 2 of Cullin-4B OS=Homo sapiens OX=9606 GN=CUL4B	Q13620-1; Q13620; Q13620-3	0	1323.72		2.40989e+06	114601	1.6365e+06		1230211		1.23671e+06		Not Found	High	Peak Found	High	Not Found	High	Not Found	High	High	3.781e-05	7.623e-05	2.93	52.69
[K].IIVACIETLR.[K]	1xCarbamidomethyl [C5]	1xCarbamidomethyl [C5]	0.000523439	9.16411e-05	1	3	3	Q14008	Q14008 [140-149]			Cytoskeleton-associated protein 5 OS=Homo sapiens OX=9606 GN=CKAP5 PE=1 SV=3	Q14008-2; Q14008; Q14008-3	0	1187.68	130082		560096		1.41607e+06	312454	156443			High	Not Found	Peak Found	Not Found	High	Peak Found	High	Not Found	High	3.781e-05	9.01e-05	2.67	63.09
[R].LLVALGTLISDDSNAVQLAK.[S]			6.22757e-11	9.16411e-05	1	1	7	Q9Y263	Q9Y263 [745-764]			Phospholipase A-2-activating protein OS=Homo sapiens OX=9606 GN=PLAA PE=1 SV=2	Q9Y263	0	2041.15	118081	342207								Peak Found	High	Not Found	Not Found	Not Found	High	Not Found	High	High	3.781e-05	7.02e-13	5.04	84.55
[R].LIVDEAINEDNSVVSLSQPK.[M]			4.99238e-11	9.16411e-05	1	1	9	P55072	P55072 [26-45]			Transitional endoplasmic reticulum ATPase OS=Homo sapiens OX=9606 GN=VCP PE=1 SV=4	P55072	0	2170.12		4.99964e+06		7.24756e+06		2.17343e+06		2734576		Not Found	High	Not Found	High	Not Found	High	Not Found	High	High	3.781e-05	5.417e-13	6.54	71.89
[K].LLVDVDESTLSPEEQK.[E]			1.98976e-06	9.16411e-05	1	1	3	O75533	O75533 [478-493]			Splicing factor 3B subunit 1 OS=Homo sapiens OX=9606 GN=SF3B1 PE=1 SV=3	O75533	0	1801.91		464011	225460	675369		316337				Not Found	High	Peak Found	High	Not Found	High	Not Found	Not Found	High	3.781e-05	1.32e-07	3.29	65.7
[K].LLVTEDWFSDISPQTMR.[R]			4.64447e-05	9.16411e-05	1	4	1	Q9ULH0	Q9ULH0 [924-940]			Kinase D-interacting substrate of 220 kDa OS=Homo sapiens OX=9606 GN=KIDINS220 PE=1 SV=3	Q9ULH0-2; Q9ULH0-4; Q9ULH0-3; Q9ULH0	0	2037.99									No Quan Values	High	Not Found	Not Found	Not Found	Not Found	Not Found	Not Found	Not Found	High	3.781e-05	5.28e-06	2.98
[K].LLVDVDESTLSPEEQKER.[K]			6.12141e-06	9.16411e-05	1	1	3	O75533	O75533 [478-495]			Splicing factor 3B subunit 1 OS=Homo sapiens OX=9606 GN=SF3B1 PE=1 SV=3	O75533	1	2087.05		542807		848473		600952				High	Peak Found	Not Found	High	Not Found	High	Not Found	Not Found	High	3.781e-05	4.917e-07	5.05	58.23
[K].LLVLEDENANVDEVELKPDTLIK.[L]			1.16563e-08	9.16411e-05	1	1	6	Q13616	Q13616 [648-670]			Cullin-1 OS=Homo sapiens OX=9606 GN=CUL1 PE=1 SV=2	Q13616	0	2609.39		5.58973e+06	135652	3.34972e+06	78148.9	2.81932e+06	254714	2863790		Not Found	High	Peak Found	High	Peak Found	High	Peak Found	Peak Found	High	3.781e-05	3.221e-10	6.49	74.91
[K].ILVISADSGMIEPVVNAVSIHQVK.[K]	1xOxidation [M10]	1xOxidation [M10]	0.000321313	9.16411e-05	1	3	3	Q9UBF8	Q9UBF8 [600-623]			Phosphatidylinositol 4-kinase beta OS=Homo sapiens OX=9606 GN=PI4KB PE=1 SV=1	Q9UBF8-2; Q9UBF8-3; Q9UBF8	0	2535.39		601371						258229		Not Found	High	Not Found	High	Not Found	Not Found	Not Found	High	High	3.781e-05	5.083e-05	3.65	71.54
[K].ILVNDGDASK.[A]			0.000389861	9.16411e-05	1	4	4	Q6W2J9	Q6W2J9 [31-40]			BCL-6 corepressor OS=Homo sapiens OX=9606 GN=BCOR PE=1 SV=1	Q6W2J9-3; Q6W2J9; Q6W2J9-4; Q6W2J9-2	0	1031.54	367030		296271		253440		187931			High	Not Found	High	Not Found	High	Not Found	High	Not Found	High	3.781e-05	6.372e-05	2.17	36.93
[R].LLVPDIQEIR.[V]			0.000274751	9.16411e-05	1	3	4	Q12756	Q12756 [1562-1571]			Kinesin-like protein KIF1A OS=Homo sapiens OX=9606 GN=KIF1A PE=1 SV=2	Q12756-2; Q12756-3; Q12756	0	1195.7	312955		684902		401618					High	Not Found	High	Not Found	High	Not Found	High	Not Found	High	3.781e-05	4.244e-05	2.04	69.31
[R].LLVPTQYVGAIIGK.[E]			0.000269737	9.16411e-05	1	1	5	Q9NZI8	Q9NZI8 [200-213]			Insulin-like growth factor 2 mRNA-binding protein 1 OS=Homo sapiens OX=9606 GN=IGF2BP1 PE=1 SV=2	Q9NZI8	0	1471.89			307807	265072		146014		149275		Not Found	High	High	High	Not Found	High	Not Found	High	High	3.781e-05	4.14e-05	2.52	78.95
[R].LLVPVDVDTNTPCYALLEVTYK.[G]	1xCarbamidomethyl [C13]	1xCarbamidomethyl [C13]	2.37033e-06	9.16411e-05	1	1	3	Q9H1A4	Q9H1A4 [1618-1639]			Anaphase-promoting complex subunit 1 OS=Homo sapiens OX=9606 GN=ANAPC1 PE=1 SV=1	Q9H1A4	0	2523.31					515850		475188			Not Found	Not Found	Not Found	Not Found	High	Not Found	High	Not Found	High	3.781e-05	1.615e-07	4.79	88.7
[R].LLVQHEINTLR.[A]			2.77279e-05	9.16411e-05	3	6	10	P49792; Q99666; O14715	P49792 [553-563]; Q99666 [554-564]; O14715 [554-564]			E3 SUMO-protein ligase RanBP2 OS=Homo sapiens OX=9606 GN=RANBP2 PE=1 SV=2 RANBP2-like and GRIP domain-containing protein 5/6 OS=Homo sapiens OX=9606 GN=RGPD5 PE=1 SV=3 RANBP2-like and GRIP domain-containing protein 8 OS=Homo sapiens OX=9606 GN=RGPD8 PE=1 SV=2	P49792; Q99666; Q99666-2; O14715; A6NKT7; Q7Z3J3	0	1335.77	1.41234e+06		3.0673e+06	642471	2.28882e+06	611954	728664	108989	Shared	High	Not Found	High	High	High	High	High	Peak Found	High	3.781e-05	2.894e-06	2.9	47.09
[R].ILVQLSPHDNLILSQPVSSPLPLSGGK.[F]			3.79166e-06	9.16411e-05	1	2	5	Q7Z401	Q7Z401 [366-392]			C-myc promoter-binding protein OS=Homo sapiens OX=9606 GN=DENND4A PE=1 SV=2	Q7Z401; Q7Z401-2	0	2809.58	224414				330960		236153			High	Not Found	High	Not Found	High	Not Found	High	Not Found	High	3.781e-05	2.806e-07	4.51	77.84
[K].LLVQTIQETTGR.[E]			0.000122168	9.16411e-05	1	2	1	Q562E7	Q562E7 [608-619]			WD repeat-containing protein 81 OS=Homo sapiens OX=9606 GN=WDR81 PE=1 SV=2	Q562E7-4; Q562E7	0	1358.76	146721				141247					Peak Found	Not Found	Not Found	Not Found	High	Not Found	Not Found	Not Found	High	3.781e-05	1.642e-05	3.21	55.68
[K].ILVEDELSSPVVVFR.[F]			4.35241e-07	9.16411e-05	1	6	8	Q6P996	Q6P996 [379-393]			Pyridoxal-dependent decarboxylase domain-containing protein 1 OS=Homo sapiens OX=9606 GN=PDXDC1 PE=1 SV=2	Q6P996-5; Q6P996-3; Q6P996; Q6P474; Q6P996-4; Q6P996-2	0	1701.94		2.07017e+06		1.91893e+06		771879		997735		Not Found	High	Not Found	High	Not Found	High	Not Found	High	High	3.781e-05	2.224e-08	4.28	80.12
[K].LNESTFDTQITKK.[M]			0.000538098	9.16411e-05	1	2	1	P78527	P78527 [1858-1870]			DNA-dependent protein kinase catalytic subunit OS=Homo sapiens OX=9606 GN=PRKDC PE=1 SV=3	P78527-2; P78527	1	1524.79	99592.1		112706		110881					Peak Found	Not Found	Peak Found	Not Found	High	Not Found	Not Found	Not Found	High	3.781e-05	9.329e-05	2.64	43.46
[R].LMEEDELPSWIIK.[D]	1xOxidation [M2]	1xOxidation [M2]	3.79166e-06	9.16411e-05	3	7	6	P51532; P51531; P51532-4	P51532 [1337-1349]; P51531 [1274-1286]; P51532-4 [1304-1316]			Transcription activator BRG1 OS=Homo sapiens OX=9606 GN=SMARCA4 PE=1 SV=2 Probable global transcription activator SNF2L2 OS=Homo sapiens OX=9606 GN=SMARCA2 PE=1 SV=2 Isoform 4 of Transcription activator BRG1 OS=Homo sapiens OX=9606 GN=SMARCA4	P51532; P51531-2; P51532-5; P51531; P51532-2; P51532-4; P51532-3	0	1618.8	996900		1.59478e+06		614218		510966		Shared	High	Not Found	High	Not Found	High	Not Found	High	Not Found	High	3.781e-05	2.81e-07	3.1	76.15
[R].LMEEDELPSWIIKDDAEVER.[L]	1xOxidation [M2]	1xOxidation [M2]	4.35241e-07	9.16411e-05	3	7	5	P51532; P51531; P51532-4	P51532 [1337-1356]; P51531 [1274-1293]; P51532-4 [1304-1323]			Transcription activator BRG1 OS=Homo sapiens OX=9606 GN=SMARCA4 PE=1 SV=2 Probable global transcription activator SNF2L2 OS=Homo sapiens OX=9606 GN=SMARCA2 PE=1 SV=2 Isoform 4 of Transcription activator BRG1 OS=Homo sapiens OX=9606 GN=SMARCA4	P51532; P51531-2; P51532-5; P51531; P51532-2; P51532-4; P51532-3	1	2433.15	1.9538e+06		2.44933e+06		1.0305e+06		750417		Shared	High	Not Found	High	Not Found	High	Not Found	High	Not Found	High	3.781e-05	2.236e-08	5.41	71.59
[K].LMSALLSGLTDR.[N]	1xOxidation [M2]	1xOxidation [M2]	2.34915e-05	9.16411e-05	1	1	6	Q5VYK3	Q5VYK3 [1401-1412]			Proteasome adapter and scaffold protein ECM29 OS=Homo sapiens OX=9606 GN=ECPAS PE=1 SV=2	Q5VYK3	0	1292.69	4753179		4.25182e+06		3.38433e+06		2632021			High	Not Found	High	Not Found	High	Not Found	High	Not Found	High	3.781e-05	2.375e-06	3.48	64.53
[R].LMTPKPVSIATNR.[S]	1xOxidation [M2]	1xOxidation [M2]	0.000220267	9.16411e-05	1	3	1	P49790	P49790 [367-379]			Nuclear pore complex protein Nup153 OS=Homo sapiens OX=9606 GN=NUP153 PE=1 SV=2	P49790-3; P49790-2; P49790	0	1443.8	88983.3		1.48078e+06		196704					Peak Found	Not Found	High	Not Found	Peak Found	Not Found	Not Found	Not Found	High	3.781e-05	3.269e-05	3.51	42.97
[K].LMVEPLQAILIR.[M]	1xOxidation [M2]	1xOxidation [M2]	1.5097e-05	9.16411e-05	1	2	5	Q13617	Q13617 [150-161]			Cullin-2 OS=Homo sapiens OX=9606 GN=CUL2 PE=1 SV=2	Q13617; Q13617-2	0	1411.83		1473549		888240		728858		544206		Not Found	High	Not Found	High	Not Found	High	Not Found	High	High	3.781e-05	1.425e-06	3.15	78.5
[R].IMWNELETLVR.[A]	1xOxidation [M2]	1xOxidation [M2]	4.73082e-05	9.16411e-05	1	2	2	Q9NVM9	Q9NVM9 [531-541]			Integrator complex subunit 13 OS=Homo sapiens OX=9606 GN=INTS13 PE=1 SV=2	Q9NVM9-2; Q9NVM9	0	1419.73		592083		119704		497542		112759		Not Found	Peak Found	Not Found	Peak Found	Not Found	High	Not Found	High	High	3.781e-05	5.424e-06	2.48	76.64
[R].INAGESIHIIR.[G]			0.000382747	9.16411e-05	1	1	1	Q9Y4B4	Q9Y4B4 [1092-1102]			Helicase ARIP4 OS=Homo sapiens OX=9606 GN=RAD54L2 PE=1 SV=4	Q9Y4B4	0	1222.69									No Quan Values	Not Found	Not Found	High	Not Found	Not Found	Not Found	Not Found	Not Found	High	3.781e-05	6.248e-05	1.89
[R].INAGLNVIGIPSEIISPK.[K]			1.09284e-08	9.16411e-05	1	1	8	Q8NCN5	Q8NCN5 [143-160]			Pyruvate dehydrogenase phosphatase regulatory subunit, mitochondrial OS=Homo sapiens OX=9606 GN=PDPR PE=1 SV=2	Q8NCN5	0	1835.06		1.8227e+06		1.05514e+06		425733		865784		Not Found	High	Not Found	High	Not Found	High	Not Found	High	High	3.781e-05	2.985e-10	5.82	81.73
[R].LNAICAQVIPFLSQEHQQQVVQAVER.[A]	1xCarbamidomethyl [C5]	1xCarbamidomethyl [C5]	1.60987e-06	9.16411e-05	1	3	4	Q04727	Q04727 [91-116]			Transducin-like enhancer protein 4 OS=Homo sapiens OX=9606 GN=TLE4 PE=1 SV=3	Q04727-2; Q04727; Q04727-3	0	3005.56		502061						296983		Not Found	High	Not Found	High	Not Found	Not Found	Not Found	High	High	3.781e-05	1.032e-07	3.98	74.96
[K].LNDLEDALQQAK.[E]			3.6545e-06	9.16411e-05	1	1	33	P04264	P04264 [444-455]			Keratin, type II cytoskeletal 1 OS=Homo sapiens OX=9606 GN=KRT1 PE=1 SV=6	P04264	0	1357.7	3.49708e+07	2.76322e+07	5.62402e+07	2.51642e+07	1.076e+08	9.83609e+07	4.92053e+07	4.69327e+07		High	High	High	High	High	High	High	High	High	3.781e-05	2.698e-07	3.18	60.55
[K].LNDLEDALQQAK.[E]	1xDeamidated [Q/N]	1xDeamidated [N2; Q9; Q10]	2.14192e-06	9.16411e-05	1	1	23	P04264	P04264 [444-455]			Keratin, type II cytoskeletal 1 OS=Homo sapiens OX=9606 GN=KRT1 PE=1 SV=6	P04264	0	1358.68	1.24648e+06	926150	2.49089e+06	534464	4.75612e+06	3.8466e+06	2.00396e+06	2.02552e+06		High	High	High	High	High	High	High	High	High	3.781e-05	1.437e-07	4.7	65.59
[K].LMSALLSGLTDR.[N]			2.22284e-05	9.16411e-05	1	1	4	Q5VYK3	Q5VYK3 [1401-1412]			Proteasome adapter and scaffold protein ECM29 OS=Homo sapiens OX=9606 GN=ECPAS PE=1 SV=2	Q5VYK3	0	1276.69	2.00356e+06		1.98722e+06		1.21434e+06		474100			High	Not Found	High	Not Found	High	Not Found	High	Not Found	High	3.781e-05	2.239e-06	3.49	72.85
[K].LNDLEDALQQAKEDLAR.[L]			2.92895e-07	9.16411e-05	1	1	7	P04264	P04264 [444-460]			Keratin, type II cytoskeletal 1 OS=Homo sapiens OX=9606 GN=KRT1 PE=1 SV=6	P04264	1	1941.99	179261	421220	420514	1.90553e+06	370129	475040	340768	185575		Peak Found	High	High	High	High	High	High	High	High	3.781e-05	1.401e-08	6.63	74.08
[K].LNDLEEALQQAK.[E]	1xDeamidated [Q/N]	1xDeamidated [N2; Q9]	1.4955e-06	9.16411e-05	1	1	10	P35908	P35908 [442-453]			Keratin, type II cytoskeletal 2 epidermal OS=Homo sapiens OX=9606 GN=KRT2 PE=1 SV=2	P35908	0	1372.7	934751	193146	892042		1.15545e+06	978495	708947	251734		High	Peak Found	High	Not Found	High	High	High	High	High	3.781e-05	9.423e-08	3.96	66.33
[K].LNDLEEALQQAKEDLAR.[L]			1.50934e-06	9.16411e-05	1	1	3	P35908	P35908 [442-458]			Keratin, type II cytoskeletal 2 epidermal OS=Homo sapiens OX=9606 GN=KRT2 PE=1 SV=2	P35908	1	1956	95158.4	200219		1.97625e+06				144124		High	Peak Found	Not Found	High	High	Not Found	Not Found	Peak Found	High	3.781e-05	9.581e-08	6.48	75.26
[R].LNDSILQATEQR.[R]			2.48205e-06	9.16411e-05	1	2	8	P15924	P15924 [1256-1267]			Desmoplakin OS=Homo sapiens OX=9606 GN=DSP PE=1 SV=3	P15924; P15924-3	0	1387.72	507232		419476	589107	414239	311257	209279	218991		High	Not Found	High	High	High	High	High	High	High	3.781e-05	1.709e-07	4.04	54.16
[K].INEAVECLLSLK.[A]	1xCarbamidomethyl [C7]	1xCarbamidomethyl [C7]	6.12273e-05	9.16411e-05	1	1	3	P07814	P07814 [850-861]			Bifunctional glutamate/proline--tRNA ligase OS=Homo sapiens OX=9606 GN=EPRS1 PE=1 SV=5	P07814	0	1388.75	399261		1.88073e+06				191433			Peak Found	Not Found	High	Not Found	High	Not Found	High	Not Found	High	3.781e-05	7.305e-06	3.02	73.78
[K].INELEAALQK.[K]			0.000504513	9.16411e-05	1	2	4	Q9UJC3	Q9UJC3 [585-594]			Protein Hook homolog 1 OS=Homo sapiens OX=9606 GN=HOOK1 PE=1 SV=2	Q9UJC3; Q9UJC3-2	0	1128.63		773382	256315	683295		404495	71880.7	440520		Not Found	High	Peak Found	High	Not Found	High	Peak Found	High	High	3.781e-05	8.654e-05	2.54	54.74
[K].LNELESDLTFK.[I]			0.000579224	9.16411e-05	1	4	8	Q6P996	Q6P996 [552-562]			Pyridoxal-dependent decarboxylase domain-containing protein 1 OS=Homo sapiens OX=9606 GN=PDXDC1 PE=1 SV=2	Q6P996-5; Q6P996-3; Q6P996; Q6P996-4	0	1308.67		2774717	248179	1.7718e+06		867937		797132		Not Found	High	Peak Found	High	Not Found	High	Not Found	High	High	3.781e-05	0.0001017	2.95	63.71
[K].LNEQQSVLQR.[I]			3.97128e-05	9.16411e-05	1	1	4	Q14683	Q14683 [1010-1019]			Structural maintenance of chromosomes protein 1A OS=Homo sapiens OX=9606 GN=SMC1A PE=1 SV=2	Q14683	0	1214.65	276492		837183		239482		127051			High	Not Found	High	Not Found	High	Not Found	High	Not Found	High	3.781e-05	4.42e-06	2.48	40.01
[K].LNEQVTQEQPLK.[D]			2.9028e-06	9.16411e-05	1	1	6	Q14690	Q14690 [123-134]			Protein RRP5 homolog OS=Homo sapiens OX=9606 GN=PDCD11 PE=1 SV=3	Q14690	0	1426.75	1.11953e+06		792833		426272		284053			High	Not Found	High	Not Found	High	Not Found	High	Not Found	High	3.781e-05	2.05e-07	3.3	43.81
[R].LNEQYEHASIHLWDLLEGK.[E]			5.18728e-05	9.16411e-05	1	2	4	Q14444	Q14444 [203-221]			Caprin-1 OS=Homo sapiens OX=9606 GN=CAPRIN1 PE=1 SV=2	Q14444; Q14444-2	0	2295.14	97156.2			779199	78344.9	722351		927501		Peak Found	Not Found	Not Found	High	Peak Found	Peak Found	Not Found	High	High	3.781e-05	5.985e-06	4.45	73.53
[K].LNDLEEALQQAK.[E]			3.72245e-06	9.16411e-05	1	1	21	P35908	P35908 [442-453]			Keratin, type II cytoskeletal 2 epidermal OS=Homo sapiens OX=9606 GN=KRT2 PE=1 SV=2	P35908	0	1371.71	2.79025e+07	9166144	1.96731e+07	10200970	3.41189e+07	2.65886e+07	2.20208e+07	1.27231e+07		High	High	High	High	High	High	High	High	High	3.781e-05	2.748e-07	4.25	61.9
[R].LMEEDELPSWIIKDDAEVER.[L]			1.04391e-07	9.16411e-05	3	7	3	P51532; P51531; P51532-4	P51532 [1337-1356]; P51531 [1274-1293]; P51532-4 [1304-1323]			Transcription activator BRG1 OS=Homo sapiens OX=9606 GN=SMARCA4 PE=1 SV=2 Probable global transcription activator SNF2L2 OS=Homo sapiens OX=9606 GN=SMARCA2 PE=1 SV=2 Isoform 4 of Transcription activator BRG1 OS=Homo sapiens OX=9606 GN=SMARCA4	P51532; P51531-2; P51532-5; P51531; P51532-2; P51532-4; P51532-3	1	2417.15	734964		753027		291590				Shared	High	Not Found	High	Not Found	High	Not Found	Not Found	Not Found	High	3.781e-05	4.202e-09	5.3	75.01
[K].LMPSAPVNTTTYVADTESEQADTWDLSERPK.[E]	1xDeamidated [Q20]; 1xOxidation [M2]	1xDeamidated [Q20]; 1xOxidation [M2]	0.00031545	9.16411e-05	1	1	1	O60934	O60934 [352-382]			Nibrin OS=Homo sapiens OX=9606 GN=NBN PE=1 SV=1	O60934	0	3469.6									No Quan Values	Not Found	Not Found	Not Found	High	Not Found	Not Found	Not Found	Not Found	High	3.781e-05	4.977e-05	4.15
[R].LMPLEAGIPDPPNMSAELIQLK.[A]	2xOxidation [M2; M14]	2xOxidation [M2; M14]	3.45801e-06	9.16411e-05	1	2	2	O14981	O14981 [1216-1237]			TATA-binding protein-associated factor 172 OS=Homo sapiens OX=9606 GN=BTAF1 PE=1 SV=2	O14981-2; O14981	0	2409.24	337822		366514		137897		207070			High	Not Found	High	Not Found	Peak Found	Not Found	Peak Found	Not Found	High	3.781e-05	2.513e-07	2.44	77.84
[R].IMEFTTTLLNTSPEGWK.[L]			0.00011349	9.16411e-05	1	2	3	P78527	P78527 [1341-1357]			DNA-dependent protein kinase catalytic subunit OS=Homo sapiens OX=9606 GN=PRKDC PE=1 SV=3	P78527-2; P78527	0	1967.98			115919		237580					Not Found	Not Found	High	Not Found	High	Not Found	Not Found	Not Found	High	3.781e-05	1.498e-05	2.55	81.43
[R].IMEFTTTLLNTSPEGWK.[L]	1xOxidation [M2]	1xOxidation [M2]	1.38858e-08	9.16411e-05	1	2	8	P78527	P78527 [1341-1357]			DNA-dependent protein kinase catalytic subunit OS=Homo sapiens OX=9606 GN=PRKDC PE=1 SV=3	P78527-2; P78527	0	1983.97	143152		471761		278233		48790.9			High	Not Found	High	Not Found	High	Not Found	High	Not Found	High	3.781e-05	3.94e-10	3.76	75.16
[K].LMEIITVENPK.[M]			3.27283e-05	9.16411e-05	1	3	4	Q92538	Q92538 [502-512]			Golgi-specific brefeldin A-resistance guanine nucleotide exchange factor 1 OS=Homo sapiens OX=9606 GN=GBF1 PE=1 SV=2	Q92538; Q92538-2; Q92538-3	0	1286.7	1.03465e+06		670283		334933					High	Not Found	High	Not Found	High	Not Found	High	Not Found	High	3.781e-05	3.52e-06	2.84	62.48
[R].IMEIVDAITTTAQSHQR.[T]			8.52838e-06	9.16411e-05	1	3	2	P08237	P08237 [185-201]			ATP-dependent 6-phosphofructokinase, muscle type OS=Homo sapiens OX=9606 GN=PFKM PE=1 SV=2	P08237-2; P08237; P08237-3	0	1913.97		223640				162689				Not Found	High	Not Found	Not Found	Not Found	High	Not Found	Not Found	High	3.781e-05	7.287e-07	3.74	65.64
[R].IMEIVDAITTTAQSHQR.[T]	1xOxidation [M2]	1xOxidation [M2]	1.0434e-09	9.16411e-05	1	3	1	P08237	P08237 [185-201]			ATP-dependent 6-phosphofructokinase, muscle type OS=Homo sapiens OX=9606 GN=PFKM PE=1 SV=2	P08237-2; P08237; P08237-3	0	1929.97		475239				469852		93036		Not Found	Peak Found	Not Found	Not Found	Not Found	High	Not Found	Peak Found	High	3.781e-05	1.902e-11	5.01	56.85
[R].IMENNLENELK.[S]	1xOxidation [M2]	1xOxidation [M2]	0.000372318	9.16411e-05	1	6	2	Q96N67	Q96N67 [761-771]			Dedicator of cytokinesis protein 7 OS=Homo sapiens OX=9606 GN=DOCK7 PE=1 SV=4	Q96N67; Q96N67-2; Q96N67-5; Q96N67-6; Q96N67-3; Q96N67-4	0	1362.66			301029		385154					Not Found	Not Found	Peak Found	Not Found	High	Not Found	Not Found	Not Found	High	3.781e-05	6.056e-05	3.4	48.52
[R].LMEPIYLVEIQCPEQVVGGIYGVLNR.[K]	1xCarbamidomethyl [C12]; 1xOxidation [M2]	1xCarbamidomethyl [C12]; 1xOxidation [M2]	0.000490769	9.16411e-05	1	1	3	P13639	P13639 [740-765]			Elongation factor 2 OS=Homo sapiens OX=9606 GN=EEF2 PE=1 SV=4	P13639	0	3005.55		2.50597e+06		88565.1	170746					Not Found	High	Not Found	High	Peak Found	High	Not Found	Not Found	High	3.781e-05	8.334e-05	3.24	87.88
[R].LMEVSVTESGEIK.[S]	1xOxidation [M2]	1xOxidation [M2]	0.000105428	9.16411e-05	1	1	3	Q7LBC6	Q7LBC6 [228-240]			Lysine-specific demethylase 3B OS=Homo sapiens OX=9606 GN=KDM3B PE=1 SV=2	Q7LBC6	0	1437.71	245910		1.05921e+06				377536			High	Not Found	High	Not Found	Not Found	Not Found	High	Not Found	High	3.781e-05	1.379e-05	2.65	49.73
[K].IMHFPTWVDLKGEDSVPDTVHHVVVPVNPK.[T]	1xOxidation [M2]	1xOxidation [M2]	6.23656e-05	9.16411e-05	1	3	4	Q92499	Q92499 [422-451]			ATP-dependent RNA helicase DDX1 OS=Homo sapiens OX=9606 GN=DDX1 PE=1 SV=2	Q92499; Q92499-3; Q92499-2	1	3408.74		652017				672975		869949		Not Found	High	Not Found	Not Found	Not Found	High	Not Found	High	High	3.781e-05	7.485e-06	5.35	63.81
[K].LMPSAPVNTTTYVADTESEQADTWDLSERPK.[E]	1xOxidation [M2]	1xOxidation [M2]	7.84603e-08	9.16411e-05	1	1	2	O60934	O60934 [352-382]			Nibrin OS=Homo sapiens OX=9606 GN=NBN PE=1 SV=1	O60934	0	3468.61		681670						366819		Not Found	High	Not Found	Not Found	Not Found	Not Found	Not Found	High	High	3.781e-05	2.991e-09	3.46	66.48
[K].LMLDTWNESIFSNIK.[N]	1xOxidation [M2]	1xOxidation [M2]	1.37685e-05	9.16411e-05	1	1	2	Q93034	Q93034 [138-152]			Cullin-5 OS=Homo sapiens OX=9606 GN=CUL5 PE=1 SV=4	Q93034	0	1826.9		524847		310282		153495		207148		Not Found	High	Not Found	Peak Found	Not Found	Peak Found	Not Found	High	High	3.781e-05	1.277e-06	2.53	81.02
[K].IMIMTDQDQDGSHIK.[G]	2xOxidation [M2; M4]	2xOxidation [M2; M4]	0.000355565	9.16411e-05	2	6	1	P11388; Q02880	P11388 [536-550]; Q02880 [557-571]			DNA topoisomerase 2-alpha OS=Homo sapiens OX=9606 GN=TOP2A PE=1 SV=3 DNA topoisomerase 2-beta OS=Homo sapiens OX=9606 GN=TOP2B PE=1 SV=3	P11388; Q02880-2; Q02880; P11388-2; P11388-3; P11388-4	0	1763.79	114449		548948		125242		53421.8		Shared	Peak Found	Not Found	High	Not Found	Peak Found	Not Found	Peak Found	Not Found	High	3.781e-05	5.707e-05	2.33	39.23
[R].IMNTFSVVPSPK.[V]			1.79845e-05	9.16411e-05	2	5	2	P07437; P68371	P07437 [163-174]; P68371 [163-174]			Tubulin beta chain OS=Homo sapiens OX=9606 GN=TUBB PE=1 SV=2 Tubulin beta-4B chain OS=Homo sapiens OX=9606 GN=TUBB4B PE=1 SV=1	Q13509; P04350; Q13509-2; P07437; P68371	0	1319.7	220229	218938	271079		93209.2			87039.9	Shared	High	Peak Found	High	Not Found	Peak Found	Not Found	Not Found	Peak Found	High	3.781e-05	1.732e-06	3.03	61.46
[R].IMNTFSVVPSPK.[V]	1xOxidation [M2]	1xOxidation [M2]	1.25569e-05	9.16411e-05	2	5	6	P07437; P68371	P07437 [163-174]; P68371 [163-174]			Tubulin beta chain OS=Homo sapiens OX=9606 GN=TUBB PE=1 SV=2 Tubulin beta-4B chain OS=Homo sapiens OX=9606 GN=TUBB4B PE=1 SV=1	Q13509; P04350; Q13509-2; P07437; P68371	0	1335.7	1.02136e+06	703690	1.40379e+06	664331	705259	362626	332836	216281	Shared	High	High	High	Peak Found	High	High	Peak Found	High	High	3.781e-05	1.146e-06	3.08	55.91
[K].LMPELPQYDQDNLK.[S]			0.000386287	9.16411e-05	1	2	3	O94822	O94822 [1408-1421]			E3 ubiquitin-protein ligase listerin OS=Homo sapiens OX=9606 GN=LTN1 PE=1 SV=6	O94822-3; O94822	0	1703.83	1.024e+06		601758							High	Not Found	High	Not Found	Not Found	Not Found	Not Found	Not Found	High	3.781e-05	6.333e-05	2.8	65.17
[K].LMPELPQYDQDNLK.[S]	1xOxidation [M2]	1xOxidation [M2]	0.000195413	9.16411e-05	1	2	4	O94822	O94822 [1408-1421]			E3 ubiquitin-protein ligase listerin OS=Homo sapiens OX=9606 GN=LTN1 PE=1 SV=6	O94822-3; O94822	0	1719.83	1.42105e+06		1.49592e+06		885818		313840			High	Not Found	High	Not Found	High	Not Found	High	Not Found	High	3.781e-05	2.853e-05	3.01	59.86
[K].LMPEIVATASK.[V]			0.000612117	9.16411e-05	1	1	3	Q92616	Q92616 [1735-1745]			eIF-2-alpha kinase activator GCN1 OS=Homo sapiens OX=9606 GN=GCN1 PE=1 SV=6	Q92616	0	1159.64	229875		267162		210694					High	Not Found	High	Not Found	High	Not Found	Not Found	Not Found	High	3.781e-05	0.0001078	1.79	55.66
[R].LMPENPTYAETAVEVPNKDPK.[T]			1.46784e-07	9.16411e-05	1	2	3	O94822	O94822 [1519-1539]			E3 ubiquitin-protein ligase listerin OS=Homo sapiens OX=9606 GN=LTN1 PE=1 SV=6	O94822-3; O94822	1	2343.15	1.44653e+06		1.22498e+06		301278					High	Not Found	High	Not Found	High	Not Found	Not Found	Not Found	High	3.781e-05	6.248e-09	5.39	54.68
[R].LMPENPTYAETAVEVPNKDPK.[T]	1xOxidation [M2]	1xOxidation [M2]	4.72745e-08	9.16411e-05	1	2	4	O94822	O94822 [1519-1539]			E3 ubiquitin-protein ligase listerin OS=Homo sapiens OX=9606 GN=LTN1 PE=1 SV=6	O94822-3; O94822	1	2359.15	1.73752e+06		2338149		951513		320188			High	Not Found	High	Not Found	High	Not Found	High	Not Found	High	3.781e-05	1.661e-09	4.76	51.2
[R].LMPLEAGIPDPPNMSAELIQLK.[A]	1xOxidation [M14]	1xOxidation [M14]	6.01097e-05	9.16411e-05	1	2	1	O14981	O14981 [1216-1237]			TATA-binding protein-associated factor 172 OS=Homo sapiens OX=9606 GN=BTAF1 PE=1 SV=2	O14981-2; O14981	0	2393.25									No Quan Values	High	Not Found	Not Found	Not Found	Not Found	Not Found	Not Found	Not Found	High	3.781e-05	7.115e-06	2.24
[K].LMLDTWNESIFSNIK.[N]	1xDeamidated [N7]; 1xOxidation [M2]	1xDeamidated [N7]; 1xOxidation [M2]	5.18728e-05	9.16411e-05	1	1	2	Q93034	Q93034 [138-152]			Cullin-5 OS=Homo sapiens OX=9606 GN=CUL5 PE=1 SV=4	Q93034	0	1827.88		1.78676e+06		1.81923e+06		396272				Not Found	High	Not Found	Peak Found	Not Found	High	Not Found	Not Found	High	3.781e-05	6.036e-06	2.3	81.08
[K].LLGPNASPDGLIPWTR.[F]			1.20968e-07	9.16411e-05	1	2	8	P42224	P42224 [526-541]			Signal transducer and activator of transcription 1-alpha/beta OS=Homo sapiens OX=9606 GN=STAT1 PE=1 SV=2	P42224-2; P42224	0	1706.92		3806863		2.98997e+06		1.64615e+06		1.15926e+06		Not Found	High	Not Found	High	Not Found	High	Not Found	High	High	3.781e-05	4.983e-09	4.54	77.85
[R].LTGDPDVLEYYK.[N]			3.30312e-05	9.16411e-05	1	2	2	Q13480	Q13480 [38-49]			GRB2-associated-binding protein 1 OS=Homo sapiens OX=9606 GN=GAB1 PE=1 SV=2	Q13480-2; Q13480	0	1412.69									No Quan Values	Not Found	High	Not Found	High	Not Found	Not Found	Not Found	Not Found	High	3.781e-05	3.533e-06	2.66
[K].LTHDVELNLDYER.[Y]			9.09419e-07	9.16411e-05	1	1	7	P02786	P02786 [601-613]			Transferrin receptor protein 1 OS=Homo sapiens OX=9606 GN=TFRC PE=1 SV=2	P02786	0	1616.79	60640.7	1.58988e+06	96444.5	1.52202e+06		528393		280240		Peak Found	High	Peak Found	High	Not Found	High	Not Found	High	High	3.781e-05	5.293e-08	3.24	53.94
[-].MSDYSTGGPPPGPPPPAGGGGGAGGAGGGPPPGPPGAGDR.[G]	1xMet-loss+Acetyl [N-Term]	1xMet-loss+Acetyl [N-Term]	3.39405e-07	9.16411e-05	1	1	5	Q92945	Q92945 [1-40]	Q92945 1xMet-loss+Acetyl [N-Term]	Q92945 1xMet-loss+Acetyl [N-Term]	Far upstream element-binding protein 2 OS=Homo sapiens OX=9606 GN=KHSRP PE=1 SV=4	Q92945	0	3246.48		282886		330805		726335		717018		Not Found	High	Not Found	Peak Found	Not Found	High	Not Found	High	High	3.781e-05	1.657e-08	3.69	64.8
[R].MSGDLSSNVTVSVTSSTISSNVASK.[A]			8.67842e-10	9.16411e-05	1	1	9	P35908	P35908 [491-515]			Keratin, type II cytoskeletal 2 epidermal OS=Homo sapiens OX=9606 GN=KRT2 PE=1 SV=2	P35908	0	2458.2	1.38459e+06	428836	221426	5.82141e+06	233865	172446	125084			High	Peak Found	Peak Found	High	High	Peak Found	Peak Found	Not Found	High	3.781e-05	1.534e-11	5.11	65.23
[R].MSGDLSSNVTVSVTSSTISSNVASK.[A]	1xOxidation [M1]	1xOxidation [M1]	1.19741e-11	9.16411e-05	1	1	17	P35908	P35908 [491-515]			Keratin, type II cytoskeletal 2 epidermal OS=Homo sapiens OX=9606 GN=KRT2 PE=1 SV=2	P35908	0	2474.19	1.37843e+06	1.04099e+06	1.34214e+06	4.77681e+06	1.5041e+06	982309	901062	644194		High	High	High	High	High	High	High	High	High	3.781e-05	1.012e-13	6.41	62.64
[R].MSGECAPNVSVSVSTSHTTISGGGSR.[G]	1xCarbamidomethyl [C5]	1xCarbamidomethyl [C5]	4.99238e-11	9.16411e-05	1	1	10	P04264	P04264 [493-518]			Keratin, type II cytoskeletal 1 OS=Homo sapiens OX=9606 GN=KRT1 PE=1 SV=6	P04264	0	2565.17	1.93459e+06	1.87537e+06	1.66539e+06	1.07273e+06	3.68663e+06	1.09409e+06	793552	1.82275e+06		High	High	High	High	High	High	High	High	High	3.781e-05	5.404e-13	6.27	48.63
[R].MSGECAPNVSVSVSTSHTTISGGGSR.[G]	1xCarbamidomethyl [C5]; 1xDeamidated [N8]	1xCarbamidomethyl [C5]; 1xDeamidated [N8]	2.79845e-05	9.16411e-05	1	1	3	P04264	P04264 [493-518]			Keratin, type II cytoskeletal 1 OS=Homo sapiens OX=9606 GN=KRT1 PE=1 SV=6	P04264	0	2566.15									No Quan Values	Not Found	Not Found	High	Not Found	High	Not Found	Not Found	High	High	3.781e-05	2.914e-06	4.02
[R].MSGECAPNVSVSVSTSHTTISGGGSR.[G]	1xCarbamidomethyl [C5]; 1xOxidation [M1]	1xCarbamidomethyl [C5]; 1xOxidation [M1]	1.49403e-10	9.16411e-05	1	1	13	P04264	P04264 [493-518]			Keratin, type II cytoskeletal 1 OS=Homo sapiens OX=9606 GN=KRT1 PE=1 SV=6	P04264	0	2581.16	1671587		2.80732e+06	3.30895e+06	4080252	2.37591e+06	1.39228e+06	2.56694e+06		High	Not Found	High	High	High	High	High	High	High	3.781e-05	1.946e-12	6.05	46.73
[R].MSGECAPNVSVSVSTSHTTISGGGSR.[G]	1xCarbamidomethyl [C5]; 1xDeamidated [N8]; 1xOxidation [M1]	1xCarbamidomethyl [C5]; 1xDeamidated [N8]; 1xOxidation [M1]	7.84603e-08	9.16411e-05	1	1	5	P04264	P04264 [493-518]			Keratin, type II cytoskeletal 1 OS=Homo sapiens OX=9606 GN=KRT1 PE=1 SV=6	P04264	0	2582.15		3504209	347844	1.53835e+06						High	High	Peak Found	High	High	Not Found	High	Not Found	High	3.781e-05	2.997e-09	5.78	46.1
[-].MSGHTLPPLPVPGTNSTEQASVPR.[A]	1xMet-loss+Acetyl [N-Term]	1xMet-loss+Acetyl [N-Term]	2.90348e-05	9.16411e-05	1	1	2	P58107	P58107 [1-24]	P58107 1xMet-loss+Acetyl [N-Term]	P58107 1xMet-loss+Acetyl [N-Term]	Epiplakin OS=Homo sapiens OX=9606 GN=EPPK1 PE=1 SV=3	P58107	0	2384.22				253885	243712		100035			Not Found	Not Found	High	Peak Found	High	Not Found	Peak Found	Not Found	High	3.781e-05	3.048e-06	3.61	66.99
[K].MSGLIVGSAFGPIK.[I]			2.55159e-06	9.16411e-05	1	1	5	Q9UKN8	Q9UKN8 [328-341]			General transcription factor 3C polypeptide 4 OS=Homo sapiens OX=9606 GN=GTF3C4 PE=1 SV=2	Q9UKN8	0	1376.76		2361404		1.37724e+06		383798		1079824		Not Found	High	Not Found	High	Not Found	Peak Found	Not Found	High	High	3.781e-05	1.77e-07	3.72	71.83
[K].MSGLIVGSAFGPIK.[I]	1xOxidation [M1]	1xOxidation [M1]	4.90609e-07	9.16411e-05	1	1	7	Q9UKN8	Q9UKN8 [328-341]			General transcription factor 3C polypeptide 4 OS=Homo sapiens OX=9606 GN=GTF3C4 PE=1 SV=2	Q9UKN8	0	1392.76		3.21114e+06		2.8102e+06		1.50756e+06		2.18059e+06		Not Found	High	Not Found	High	Not Found	High	Not Found	High	High	3.781e-05	2.571e-08	4.54	67.51
[-].MSGTQSTITDRFPLK.[K]	1xMet-loss+Acetyl [N-Term]	1xMet-loss+Acetyl [N-Term]	1.86595e-05	9.16411e-05	1	2	4	Q9NZN5	Q9NZN5 [1-15]	Q9NZN5 1xMet-loss+Acetyl [N-Term]	Q9NZN5 1xMet-loss+Acetyl [N-Term]	Rho guanine nucleotide exchange factor 12 OS=Homo sapiens OX=9606 GN=ARHGEF12 PE=1 SV=1	Q9NZN5; Q9NZN5-2	1	1592.83	256018		600339		260869					High	Not Found	High	Not Found	High	Not Found	High	Not Found	High	3.781e-05	1.823e-06	4.07	61.06
[R].MSHLEDILGK.[L]	1xOxidation [M1]	1xOxidation [M1]	6.01097e-05	9.16411e-05	1	5	2	O94901	O94901 [462-471]			SUN domain-containing protein 1 OS=Homo sapiens OX=9606 GN=SUN1 PE=1 SV=3	O94901-8; O94901-5; O94901-9; O94901; O94901-6	0	1158.58				229940				696750		Not Found	Not Found	Not Found	Peak Found	Not Found	Not Found	Not Found	High	High	3.781e-05	7.118e-06	3.01	47.46
[K].MSLDISAVQDGR.[L]	1xOxidation [M1]	1xOxidation [M1]	1.29088e-05	9.16411e-05	1	1	1	Q92547	Q92547 [997-1008]			DNA topoisomerase 2-binding protein 1 OS=Homo sapiens OX=9606 GN=TOPBP1 PE=1 SV=3	Q92547	0	1307.63	33024.5	238326	199318	177964						Peak Found	Peak Found	High	Peak Found	Not Found	Not Found	Not Found	Not Found	High	3.781e-05	1.174e-06	2.99	52.77
[R].MSLIEEEGSK.[R]	1xOxidation [M1]	1xOxidation [M1]	0.000132727	9.16411e-05	1	2	4	P06737	P06737 [429-438]			Glycogen phosphorylase, liver form OS=Homo sapiens OX=9606 GN=PYGL PE=1 SV=4	P06737-2; P06737	0	1138.53		1.57682e+06		1.25067e+06		303380		883956		Not Found	High	Not Found	High	Not Found	High	Not Found	High	High	3.781e-05	1.814e-05	3.11	39.64
[K].MSINAEEVVVGDLVEVK.[G]			6.29139e-07	9.16411e-05	1	4	9	P05023	P05023 [178-194]			Sodium/potassium-transporting ATPase subunit alpha-1 OS=Homo sapiens OX=9606 GN=ATP1A1 PE=1 SV=1	P05023-2; P05023; P05023-4; P05023-3	0	1830.95		2.32769e+06		2480121		980107		676009		Not Found	High	Not Found	High	Not Found	High	Not Found	High	High	3.781e-05	3.423e-08	5.09	79.94
[K].MSINAEEVVVGDLVEVK.[G]	1xOxidation [M1]	1xOxidation [M1]	1.9341e-09	9.16411e-05	1	4	11	P05023	P05023 [178-194]			Sodium/potassium-transporting ATPase subunit alpha-1 OS=Homo sapiens OX=9606 GN=ATP1A1 PE=1 SV=1	P05023-2; P05023; P05023-4; P05023-3	0	1846.95	85333.6	3.39034e+06	149726	4.54857e+06		2.07117e+06		1.22724e+06		High	High	Peak Found	High	Not Found	High	Not Found	High	High	3.781e-05	3.905e-11	5.49	75.89
[-].MSNPFAHLAEPLDPVQPGKK.[F]	1xMet-loss+Acetyl [N-Term]	1xMet-loss+Acetyl [N-Term]	4.99964e-05	9.16411e-05	1	1	2	P21399	P21399 [1-20]	P21399 1xMet-loss+Acetyl [N-Term]	P21399 1xMet-loss+Acetyl [N-Term]	Cytoplasmic aconitate hydratase OS=Homo sapiens OX=9606 GN=ACO1 PE=1 SV=3	P21399	1	2087.09	74265.8	240284		463139		269381		201609		Peak Found	Peak Found	Not Found	High	Not Found	Peak Found	Not Found	High	High	3.781e-05	5.765e-06	4.72	68
[R].MSPFPLTSMDK.[A]			0.000264815	9.16411e-05	1	2	1	Q9NQX3-2	Q9NQX3-2 [351-361]			Isoform 2 of Gephyrin OS=Homo sapiens OX=9606 GN=GPHN	Q9NQX3; Q9NQX3-2	0	1253.59	96828.2	712290		334827	120065	106403	87118.6	1.29897e+06		Peak Found	Peak Found	Not Found	Peak Found	Peak Found	Peak Found	Peak Found	High	High	3.781e-05	4.057e-05	3.16	65.08
[R].MSPFPLTSMDK.[A]	2xOxidation [M1; M9]	2xOxidation [M1; M9]	0.000228533	9.16411e-05	1	2	7	Q9NQX3-2	Q9NQX3-2 [351-361]			Isoform 2 of Gephyrin OS=Homo sapiens OX=9606 GN=GPHN	Q9NQX3; Q9NQX3-2	0	1285.58		3.66692e+06		3.80402e+06		4.23559e+06		8823023		Not Found	High	Not Found	High	Not Found	High	Not Found	High	High	3.781e-05	3.405e-05	2.71	52.07
[-].MSAADEVDGLGVARPHYGSVLDNER.[L]	1xMet-loss+Acetyl [N-Term]	1xMet-loss+Acetyl [N-Term]	2.48205e-06	9.16411e-05	1	1	6	P46940	P46940 [1-25]	P46940 1xMet-loss+Acetyl [N-Term]	P46940 1xMet-loss+Acetyl [N-Term]	Ras GTPase-activating-like protein IQGAP1 OS=Homo sapiens OX=9606 GN=IQGAP1 PE=1 SV=1	P46940	0	2569.23	930937				2.0662e+06		2.92563e+06			High	Not Found	High	Not Found	High	Not Found	High	Not Found	High	3.781e-05	1.707e-07	4.8	63.65
[K].MRPEIAGLKPANPPVLPAPQK.[A]	1xOxidation [M1]	1xOxidation [M1]	8.6073e-06	9.16411e-05	1	1	1	Q9UKM7	Q9UKM7 [121-141]			Endoplasmic reticulum mannosyl-oligosaccharide 1,2-alpha-mannosidase OS=Homo sapiens OX=9606 GN=MAN1B1 PE=1 SV=2	Q9UKM7	0	2240.26									No Quan Values	Not Found	Not Found	Not Found	Not Found	Not Found	Not Found	Not Found	High	High	3.781e-05	7.307e-07	3.21
[K].MRLEKEIETYHNLLEGGQEDFESSGAGK.[I]			0.000460137	9.16411e-05	1	1	1	P35527	P35527 [445-472]			Keratin, type I cytoskeletal 9 OS=Homo sapiens OX=9606 GN=KRT9 PE=1 SV=3	P35527	2	3167.49		834699								Not Found	High	Not Found	Not Found	Not Found	Not Found	Not Found	Not Found	High	3.781e-05	7.727e-05	6.57	65.62
[R].MREEENEGIVQLR.[I]	1xOxidation [M1]	1xOxidation [M1]	0.000228533	9.16411e-05	1	1	5	Q93034	Q93034 [699-711]			Cullin-5 OS=Homo sapiens OX=9606 GN=CUL5 PE=1 SV=4	Q93034	1	1618.79		2388721	71321.9	1.51877e+06		933242		1.50495e+06		Not Found	High	Peak Found	High	Not Found	High	Not Found	High	High	3.781e-05	3.417e-05	4.15	41.92
[R].MQALTYLQR.[A]	1xOxidation [M1]	1xOxidation [M1]	0.000342707	9.16411e-05	1	3	4	Q92538	Q92538 [1562-1570]			Golgi-specific brefeldin A-resistance guanine nucleotide exchange factor 1 OS=Homo sapiens OX=9606 GN=GBF1 PE=1 SV=2	Q92538; Q92538-2; Q92538-3	0	1139.59	1.37291e+06		1.1375e+06		579016		326686			High	Not Found	High	Not Found	High	Not Found	High	Not Found	High	3.781e-05	5.472e-05	2.78	47.91
[K].MQAYQYEQISADPDKPLADGIR.[A]			4.19694e-05	9.16411e-05	1	2	3	Q7KZ85	Q7KZ85 [420-441]			Transcription elongation factor SPT6 OS=Homo sapiens OX=9606 GN=SUPT6H PE=1 SV=2	Q7KZ85; Q7KZ85-3	0	2509.2	189201		162176		310178		90875.6			High	Not Found	High	Not Found	High	Not Found	Peak Found	Not Found	High	3.781e-05	4.676e-06	4.94	61.47
[K].MQAYQYEQISADPDKPLADGIR.[A]	1xOxidation [M1]	1xOxidation [M1]	2.34802e-07	9.16411e-05	1	2	4	Q7KZ85	Q7KZ85 [420-441]			Transcription elongation factor SPT6 OS=Homo sapiens OX=9606 GN=SUPT6H PE=1 SV=2	Q7KZ85; Q7KZ85-3	0	2525.2	237515		202447		373913		129777			High	Not Found	High	Not Found	High	Not Found	High	Not Found	High	3.781e-05	1.078e-08	5.39	59.16
[K].MQETLVGLELENER.[L]	1xOxidation [M1]	1xOxidation [M1]	3.97038e-06	9.16411e-05	1	2	2	Q9Y6D9	Q9Y6D9 [296-309]			Mitotic spindle assembly checkpoint protein MAD1 OS=Homo sapiens OX=9606 GN=MAD1L1 PE=1 SV=2	Q9Y6D9; Q9Y6D9-3	0	1676.82		1.48383e+06								Not Found	High	Not Found	Not Found	Not Found	Not Found	Not Found	Not Found	High	3.781e-05	2.969e-07	4.41	63.92
[K].MQGILDPRPTIIK.[A]			0.000419663	9.16411e-05	1	2	8	Q9NQX3-2	Q9NQX3-2 [679-691]			Isoform 2 of Gephyrin OS=Homo sapiens OX=9606 GN=GPHN	Q9NQX3; Q9NQX3-2	0	1481.85		2.73077e+06		2.99183e+06		1.79252e+06		6.12732e+06		Not Found	High	Not Found	High	Not Found	High	Not Found	High	High	3.781e-05	6.986e-05	2.64	57.29
[K].MQGQSPPAPTR.[G]			0.000167092	9.16411e-05	1	3	2	Q14008	Q14008 [812-822]			Cytoskeleton-associated protein 5 OS=Homo sapiens OX=9606 GN=CKAP5 PE=1 SV=3	Q14008-2; Q14008; Q14008-3	0	1169.57	127541		205279		568358					Peak Found	Not Found	High	Not Found	High	Not Found	Not Found	Not Found	High	3.781e-05	2.364e-05	2.64	32.07
[K].MQGQSPPAPTR.[G]	1xOxidation [M1]	1xOxidation [M1]	4.55969e-05	9.16411e-05	1	3	4	Q14008	Q14008 [812-822]			Cytoskeleton-associated protein 5 OS=Homo sapiens OX=9606 GN=CKAP5 PE=1 SV=3	Q14008-2; Q14008; Q14008-3	0	1185.57	6735.17		336348		1.67949e+06		117146			Peak Found	Not Found	High	Not Found	High	Not Found	High	Not Found	High	3.781e-05	5.195e-06	2.84	29.05
[K].MQGSITTPGSIALAQAQAQAQVPAK.[A]			0.000214265	9.16411e-05	1	4	1	A5YKK6	A5YKK6 [1005-1029]			CCR4-NOT transcription complex subunit 1 OS=Homo sapiens OX=9606 GN=CNOT1 PE=1 SV=2	A5YKK6-2; A5YKK6; A5YKK6-4; A5YKK6-3	0	2467.3									No Quan Values	Not Found	Not Found	Not Found	Not Found	High	Not Found	Not Found	Not Found	High	3.781e-05	3.157e-05	4.59
[K].MQGSITTPGSIALAQAQAQAQVPAK.[A]	1xOxidation [M1]	1xOxidation [M1]	2.50502e-06	9.16411e-05	1	4	1	A5YKK6	A5YKK6 [1005-1029]			CCR4-NOT transcription complex subunit 1 OS=Homo sapiens OX=9606 GN=CNOT1 PE=1 SV=2	A5YKK6-2; A5YKK6; A5YKK6-4; A5YKK6-3	0	2483.29					1188333					Not Found	Not Found	Not Found	Not Found	High	Not Found	Not Found	Not Found	High	3.781e-05	1.724e-07	6.13	64.58
[-].MSQWYELQQLDSK.[F]	1xMet-loss+Acetyl [N-Term]	1xMet-loss+Acetyl [N-Term]	5.13972e-05	9.16411e-05	1	2	6	P42224	P42224 [1-13]	P42224 1xMet-loss+Acetyl [N-Term]	P42224 1xMet-loss+Acetyl [N-Term]	Signal transducer and activator of transcription 1-alpha/beta OS=Homo sapiens OX=9606 GN=STAT1 PE=1 SV=2	P42224-2; P42224	0	1566.74		2868464		2.21881e+06		966113		977416		Not Found	High	Not Found	High	Not Found	High	Not Found	High	High	3.781e-05	5.951e-06	4.04	81.16
[K].MQGSITTPGSIALAQAQAQAQVPAK.[A]	1xDeamidated [Q15]; 1xOxidation [M1]	1xDeamidated [Q15]; 1xOxidation [M1]	0.000589987	9.16411e-05	1	4	3	A5YKK6	A5YKK6 [1005-1029]			CCR4-NOT transcription complex subunit 1 OS=Homo sapiens OX=9606 GN=CNOT1 PE=1 SV=2	A5YKK6-2; A5YKK6; A5YKK6-4; A5YKK6-3	0	2484.28									No Quan Values	Not Found	Not Found	High	Not Found	High	Not Found	High	Not Found	High	3.781e-05	0.0001035	6.75
[K].MQLEEQVLTISSEIPK.[R]			4.15547e-08	9.16411e-05	1	1	4	Q6NUQ1	Q6NUQ1 [86-101]			RAD50-interacting protein 1 OS=Homo sapiens OX=9606 GN=RINT1 PE=1 SV=1	Q6NUQ1	0	1844.97		1.11312e+06		466624				70777.5		Not Found	High	Not Found	High	Not Found	Not Found	Not Found	Peak Found	High	3.781e-05	1.428e-09	5.1	79.36
[K].MQLEEQVLTISSEIPK.[R]	1xOxidation [M1]	1xOxidation [M1]	2.64798e-05	9.16411e-05	1	1	5	Q6NUQ1	Q6NUQ1 [86-101]			RAD50-interacting protein 1 OS=Homo sapiens OX=9606 GN=RINT1 PE=1 SV=1	Q6NUQ1	0	1860.96		521311		699221		407226		308184		Not Found	High	Not Found	Peak Found	Not Found	High	Not Found	High	High	3.781e-05	2.745e-06	3.71	74
[K].MQLEEQVLTISSEIPKR.[I]			0.000101615	9.16411e-05	1	1	1	Q6NUQ1	Q6NUQ1 [86-102]			RAD50-interacting protein 1 OS=Homo sapiens OX=9606 GN=RINT1 PE=1 SV=1	Q6NUQ1	1	2001.07									No Quan Values	Not Found	Not Found	Not Found	Not Found	Not Found	Not Found	Not Found	High	High	3.781e-05	1.323e-05	2.26
[K].MQLEEQVLTISSEIPKR.[I]	1xOxidation [M1]	1xOxidation [M1]	0.000127926	9.16411e-05	1	1	1	Q6NUQ1	Q6NUQ1 [86-102]			RAD50-interacting protein 1 OS=Homo sapiens OX=9606 GN=RINT1 PE=1 SV=1	Q6NUQ1	1	2017.06		357850		233892				108822		Not Found	High	Not Found	Peak Found	Not Found	Not Found	Not Found	Peak Found	High	3.781e-05	1.723e-05	4.7	64.67
[-G].MQIFVKTLTGKTITLEVEPSDTIENVK.[A]			0.000164043	9.16411e-05	1	4	4	P62987	P62987 [1-27]			Ubiquitin-60S ribosomal protein L40 OS=Homo sapiens OX=9606 GN=UBA52 PE=1 SV=2	P62987; P62979; P0CG47; P0CG48	2	3034.64	189267		335590							High	Not Found	High	High	Not Found	Not Found	Not Found	Not Found	High	3.781e-05	2.326e-05	4.76	75.22
[R].MQLSAELQSDTEEILSK.[A]			1.89973e-07	9.16411e-05	1	1	2	O75643	O75643 [1902-1918]			U5 small nuclear ribonucleoprotein 200 kDa helicase OS=Homo sapiens OX=9606 GN=SNRNP200 PE=1 SV=2	O75643	0	1921.94			184961		152345					Not Found	Not Found	High	Not Found	High	Not Found	Not Found	Not Found	High	3.781e-05	8.417e-09	3.9	75.73
[R].MQLSAELQSDTEEILSK.[A]	1xOxidation [M1]	1xOxidation [M1]	2.92895e-07	9.16411e-05	1	1	4	O75643	O75643 [1902-1918]			U5 small nuclear ribonucleoprotein 200 kDa helicase OS=Homo sapiens OX=9606 GN=SNRNP200 PE=1 SV=2	O75643	0	1937.94			661498	240341	649320					Not Found	Not Found	High	Peak Found	High	Not Found	Not Found	Not Found	High	3.781e-05	1.398e-08	4	70.81
[K].MQYFQPTIQEK.[G]			0.000129109	9.16411e-05	1	2	4	Q8IZH2	Q8IZH2 [1246-1256]			5'-3' exoribonuclease 1 OS=Homo sapiens OX=9606 GN=XRN1 PE=1 SV=1	Q8IZH2; Q8IZH2-2	0	1412.69	550712		668514		198876		132897			High	Not Found	Peak Found	Not Found	High	Not Found	High	Not Found	High	3.781e-05	1.756e-05	2.75	55.31
[K].MQYFQPTIQEK.[G]	1xOxidation [M1]	1xOxidation [M1]	0.000158109	9.16411e-05	1	2	4	Q8IZH2	Q8IZH2 [1246-1256]			5'-3' exoribonuclease 1 OS=Homo sapiens OX=9606 GN=XRN1 PE=1 SV=1	Q8IZH2; Q8IZH2-2	0	1428.68	766301	439903	1.28326e+06	158403	550835		432390			High	Peak Found	High	Peak Found	High	Not Found	High	Not Found	High	3.781e-05	2.229e-05	2.83	50.21
[K].MQHNVLVAEVTQQLK.[A]	1xOxidation [M1]	1xOxidation [M1]	0.000135194	9.16411e-05	1	3	4	Q13618	Q13618 [717-731]			Cullin-3 OS=Homo sapiens OX=9606 GN=CUL3 PE=1 SV=2	Q13618; Q13618-3; Q13618-2	0	1753.93		1.11726e+06		903685		567007		331424		Not Found	High	Not Found	High	Not Found	High	Not Found	High	High	3.781e-05	1.843e-05	1.32	56
[R].MSSHTETSSFLQTLTGR.[L]	1xOxidation [M1]	1xOxidation [M1]	0.000658896	9.16411e-05	1	6	1	Q96N67	Q96N67 [962-978]			Dedicator of cytokinesis protein 7 OS=Homo sapiens OX=9606 GN=DOCK7 PE=1 SV=4	Q96N67; Q96N67-2; Q96N67-5; Q96N67-6; Q96N67-3; Q96N67-4	0	1898.89			150565		158514					Not Found	Not Found	Peak Found	Not Found	High	Not Found	Not Found	Not Found	High	3.781e-05	0.0001186	2.54	58.97
[R].MSSKPINFSVILK.[L]			0.000239302	9.16411e-05	1	1	3	Q9Y3T9	Q9Y3T9 [495-507]			Nucleolar complex protein 2 homolog OS=Homo sapiens OX=9606 GN=NOC2L PE=1 SV=4	Q9Y3T9	0	1463.83		1316033		1.11488e+06		182131		694479		Not Found	High	Not Found	High	Not Found	Peak Found	Not Found	High	High	3.781e-05	3.592e-05	3.58	59.79
[R].MSSKPINFSVILK.[L]	1xOxidation [M1]	1xOxidation [M1]	3.06775e-06	9.16411e-05	1	1	8	Q9Y3T9	Q9Y3T9 [495-507]			Nucleolar complex protein 2 homolog OS=Homo sapiens OX=9606 GN=NOC2L PE=1 SV=4	Q9Y3T9	0	1479.82		7.89451e+06		4.50737e+06		1.76806e+06		2.9103e+06		Not Found	High	Not Found	High	Not Found	High	Not Found	High	High	3.781e-05	2.203e-07	3.81	56.94
[R].MVEPENAVTITPLRPEDDYSPR.[E]			4.73082e-05	9.16411e-05	2	3	4	Q14160-3; Q14160	Q14160-3 [816-837]; Q14160 [816-837]			Isoform 3 of Protein scribble homolog OS=Homo sapiens OX=9606 GN=SCRIB Protein scribble homolog OS=Homo sapiens OX=9606 GN=SCRIB PE=1 SV=4	Q14160-2; Q14160-3; Q14160	0	2529.23	1.13431e+06		858419						Shared	High	Not Found	High	Not Found	High	Not Found	High	Not Found	High	3.781e-05	5.399e-06	4.19	64.05
[R].MVEPENAVTITPLRPEDDYSPR.[E]	1xOxidation [M1]	1xOxidation [M1]	8.37438e-05	9.16411e-05	2	3	4	Q14160-3; Q14160	Q14160-3 [816-837]; Q14160 [816-837]			Isoform 3 of Protein scribble homolog OS=Homo sapiens OX=9606 GN=SCRIB Protein scribble homolog OS=Homo sapiens OX=9606 GN=SCRIB PE=1 SV=4	Q14160-2; Q14160-3; Q14160	0	2545.22	1286943		1.23215e+06		559584		580290		Shared	High	Not Found	High	Not Found	High	Not Found	High	Not Found	High	3.781e-05	1.057e-05	3.91	61.58
[R].MVESCLGSPCWASPQLLR.[I]	2xCarbamidomethyl [C5; C10]; 1xOxidation [M1]	2xCarbamidomethyl [C5; C10]; 1xOxidation [M1]	1.23247e-06	9.16411e-05	1	3	6	Q9Y4W2	Q9Y4W2 [465-482]			Ribosomal biogenesis protein LAS1L OS=Homo sapiens OX=9606 GN=LAS1L PE=1 SV=2	Q9Y4W2-3; Q9Y4W2-2; Q9Y4W2	0	2106.98		718345				255053		441958		Not Found	High	Not Found	Not Found	Not Found	High	Not Found	High	High	3.781e-05	7.544e-08	3.56	71.33
[K].MVFINNIALAQIK.[N]			0.00011667	9.16411e-05	1	1	1	P42704	P42704 [1177-1189]			Leucine-rich PPR motif-containing protein, mitochondrial OS=Homo sapiens OX=9606 GN=LRPPRC PE=1 SV=3	P42704	0	1474.85			172486		69575.6					Not Found	Not Found	High	Not Found	Peak Found	Not Found	Not Found	Not Found	High	3.781e-05	1.552e-05	2.68	75.93
[K].MVFINNIALAQIK.[N]	1xOxidation [M1]	1xOxidation [M1]	0.000606508	9.16411e-05	1	1	2	P42704	P42704 [1177-1189]			Leucine-rich PPR motif-containing protein, mitochondrial OS=Homo sapiens OX=9606 GN=LRPPRC PE=1 SV=3	P42704	0	1490.84	83965.2		231986		117500					Peak Found	Not Found	High	Not Found	High	Not Found	Not Found	Not Found	High	3.781e-05	0.0001073	2.87	70.49
[-].MVGPGPTAAAAVEER.[Q]	1xMet-loss [N-Term]	1xMet-loss [N-Term]	0.000304041	9.16411e-05	1	1	1	Q8IYA6	Q8IYA6 [1-15]	Q8IYA6 1xMet-loss [N-Term]	Q8IYA6 1xMet-loss [N-Term]	Cytoskeleton-associated protein 2-like OS=Homo sapiens OX=9606 GN=CKAP2L PE=1 SV=4	Q8IYA6	0	1324.69									No Quan Values	Not Found	Not Found	Not Found	Not Found	Not Found	Not Found	Not Found	High	High	3.781e-05	4.785e-05	2.63
[R].MVLCSQQWK.[L]	1xCarbamidomethyl [C4]	1xCarbamidomethyl [C4]	0.000612117	9.16411e-05	1	2	1	P17480	P17480 [325-333]			Nucleolar transcription factor 1 OS=Homo sapiens OX=9606 GN=UBTF PE=1 SV=1	P17480-2; P17480	0	1179.56					121725	393611		378294		Not Found	Not Found	Not Found	Not Found	Peak Found	Peak Found	Not Found	High	High	3.781e-05	0.0001078	2.81	50.17
[K].MVIENELEDPAIMR.[A]	2xOxidation [M1; M13]	2xOxidation [M1; M13]	8.76907e-05	9.16411e-05	1	2	3	Q86TB9	Q86TB9 [93-106]			Protein PAT1 homolog 1 OS=Homo sapiens OX=9606 GN=PATL1 PE=1 SV=2	Q86TB9-4; Q86TB9	0	1691.8	167270	600908		786156	176665	323791	108715	377847		Peak Found	High	Not Found	High	Peak Found	Peak Found	Peak Found	High	High	3.781e-05	1.108e-05	3.28	58.44
[K].MVLLDLPSISSQVVR.[K]			4.43542e-05	9.16411e-05	1	1	3	Q5VIR6-4	Q5VIR6-4 [705-719]			Isoform 4 of Vacuolar protein sorting-associated protein 53 homolog OS=Homo sapiens OX=9606 GN=VPS53	Q5VIR6-4	0	1656.94				479508				176129		Not Found	High	Not Found	High	Not Found	Not Found	Not Found	High	High	3.781e-05	5.033e-06	3.24	82.58
[R].MVDGWNAFFFDK.[T]	1xOxidation [M1]	1xOxidation [M1]	3.01245e-05	9.16411e-05	1	1	3	Q5TAX3	Q5TAX3 [1156-1167]			Terminal uridylyltransferase 4 OS=Homo sapiens OX=9606 GN=TUT4 PE=1 SV=3	Q5TAX3	0	1492.66	182560		287816							High	Not Found	High	Not Found	Not Found	Not Found	High	Not Found	High	3.781e-05	3.177e-06	3.21	81.2
[K].MVIPALIQSDSGDSIEVSR.[N]			1.83146e-06	9.16411e-05	1	1	3	Q9H583	Q9H583 [1352-1370]			HEAT repeat-containing protein 1 OS=Homo sapiens OX=9606 GN=HEATR1 PE=1 SV=3	Q9H583	0	2017.03					494751					Not Found	Not Found	Not Found	Not Found	High	Not Found	Not Found	Not Found	High	3.781e-05	1.202e-07	4.08	76.02
[R].MVLVDLPGVINTVTSGMAPDTK.[E]	2xOxidation [M1; M17]	2xOxidation [M1; M17]	7.63406e-07	9.16411e-05	1	6	6	O60313-10	O60313-10 [449-470]			Isoform 4 of Dynamin-like 120 kDa protein, mitochondrial OS=Homo sapiens OX=9606 GN=OPA1	O60313-9; O60313; O60313-10; O60313-2; O60313-11; O60313-13	0	2290.17		1.13062e+06		884461		553403	100731	723581		Not Found	High	Not Found	High	Not Found	High	Peak Found	High	High	3.781e-05	4.305e-08	5.13	82.89
[K].MVMISLEGEDGLDEIYSFSESLRK.[L]	2xOxidation [M1; M3]	2xOxidation [M1; M3]	9.97598e-05	9.16411e-05	1	1	1	P13010	P13010 [210-233]			X-ray repair cross-complementing protein 5 OS=Homo sapiens OX=9606 GN=XRCC5 PE=1 SV=3	P13010	1	2780.3						651824				Not Found	Not Found	Not Found	Not Found	Not Found	High	Not Found	Not Found	High	3.781e-05	1.291e-05	5.37	84.04
[K].MVNPTTVLESPHSLPAK.[L]	1xOxidation [M1]	1xOxidation [M1]	1.62516e-05	9.16411e-05	1	3	1	Q7Z6Z7	Q7Z6Z7 [1209-1225]			E3 ubiquitin-protein ligase HUWE1 OS=Homo sapiens OX=9606 GN=HUWE1 PE=1 SV=3	Q7Z6Z7-2; Q7Z6Z7; Q7Z6Z7-3	0	1836.95			187968		164138					Not Found	Not Found	Peak Found	Not Found	High	Not Found	Not Found	Not Found	High	3.781e-05	1.541e-06	3.68	53.08
[K].MVPVSVQQSLAAYNQR.[K]	1xOxidation [M1]	1xOxidation [M1]	1.88231e-07	9.16411e-05	1	2	2	Q8WUM4	Q8WUM4 [358-373]			Programmed cell death 6-interacting protein OS=Homo sapiens OX=9606 GN=PDCD6IP PE=1 SV=1	Q8WUM4-2; Q8WUM4	0	1806.92				274159		247599		142755		Not Found	Not Found	Not Found	Peak Found	Not Found	High	Not Found	Peak Found	High	3.781e-05	8.341e-09	3.46	59.23
[R].MVSALQQQQQQQQR.[Q]			4.3125e-07	9.16411e-05	1	3	1	Q9UPQ9-1	Q9UPQ9-1 [1206-1219]			Isoform 2 of Trinucleotide repeat-containing gene 6B protein OS=Homo sapiens OX=9606 GN=TNRC6B	Q9UPQ9; Q9UPQ9-1; Q9UPQ9-2	0	1700.85									No Quan Values	High	Not Found	Not Found	Not Found	Not Found	Not Found	Not Found	Not Found	High	3.781e-05	2.201e-08	3.88
[R].MVSALQQQQQQQQR.[Q]	1xOxidation [M1]	1xOxidation [M1]	3.12402e-07	9.16411e-05	1	3	2	Q9UPQ9-1	Q9UPQ9-1 [1206-1219]			Isoform 2 of Trinucleotide repeat-containing gene 6B protein OS=Homo sapiens OX=9606 GN=TNRC6B	Q9UPQ9; Q9UPQ9-1; Q9UPQ9-2	0	1716.84	239601		102757		67682.4		108865			High	Not Found	Peak Found	Not Found	Peak Found	Not Found	High	Not Found	High	3.781e-05	1.512e-08	3.98	33.35
[R].MVSEEMEEQVHSIR.[G]	1xOxidation [M1]	1xOxidation [M1]	3.15444e-05	9.16411e-05	1	2	1	Q99661	Q99661 [164-177]			Kinesin-like protein KIF2C OS=Homo sapiens OX=9606 GN=KIF2C PE=1 SV=2	Q99661; Q99661-2	0	1719.77									No Quan Values	Not Found	Not Found	Not Found	Not Found	Not Found	Not Found	Not Found	High	High	3.781e-05	3.367e-06	2.73
[R].MVSEEMEEQVHSIR.[G]	2xOxidation [M1; M6]	2xOxidation [M1; M6]	6.65192e-05	9.16411e-05	1	2	2	Q99661	Q99661 [164-177]			Kinesin-like protein KIF2C OS=Homo sapiens OX=9606 GN=KIF2C PE=1 SV=2	Q99661; Q99661-2	0	1735.76				336324		339106		281746		Not Found	Not Found	Not Found	Peak Found	Not Found	High	Not Found	High	High	3.781e-05	8.036e-06	2.56	34.98
[R].MVSEQCHLLSQFFR.[E]	1xCarbamidomethyl [C6]	1xCarbamidomethyl [C6]	0.000563446	9.16411e-05	1	4	1	Q6YHU6	Q6YHU6 [1874-1887]			Thyroid adenoma-associated protein OS=Homo sapiens OX=9606 GN=THADA PE=1 SV=1	Q6YHU6-2; Q6YHU6-3; Q6YHU6-4; Q6YHU6	0	1781.85									No Quan Values	High	Not Found	Not Found	Not Found	Not Found	Not Found	Not Found	Not Found	High	3.781e-05	9.785e-05	2.78
[K].MVIPALIQSDSGDSIEVSR.[N]	1xOxidation [M1]	1xOxidation [M1]	6.52753e-07	9.16411e-05	1	1	2	Q9H583	Q9H583 [1352-1370]			HEAT repeat-containing protein 1 OS=Homo sapiens OX=9606 GN=HEATR1 PE=1 SV=3	Q9H583	0	2033.02					722832					Not Found	Not Found	Not Found	Not Found	High	Not Found	Not Found	Not Found	High	3.781e-05	3.585e-08	4.43	69.94
[R].MPIYGTAQPSAK.[A]	1xOxidation [M1]	1xOxidation [M1]	5.79353e-05	9.16411e-05	1	1	2	Q9ULE6	Q9ULE6 [512-523]			Paladin OS=Homo sapiens OX=9606 GN=PALD1 PE=1 SV=3	Q9ULE6	0	1279.64		1.00069e+06		398108		178706		857736		Not Found	High	Not Found	Peak Found	Not Found	Peak Found	Not Found	High	High	3.781e-05	6.853e-06	3.06	38.06
[R].MVDGWNAFFFDK.[T]			0.000127926	9.16411e-05	1	1	2	Q5TAX3	Q5TAX3 [1156-1167]			Terminal uridylyltransferase 4 OS=Homo sapiens OX=9606 GN=TUT4 PE=1 SV=3	Q5TAX3	0	1476.66	103719									High	Not Found	High	Not Found	Not Found	Not Found	Not Found	Not Found	High	3.781e-05	1.723e-05	2.09	84.08
[-].MTVLQEPVQAAIWQALNHYAYR.[D]	1xMet-loss [N-Term]	1xMet-loss [N-Term]	6.28984e-08	9.16411e-05	1	2	5	P30260	P30260 [1-22]	P30260 1xMet-loss [N-Term]	P30260 1xMet-loss [N-Term]	Cell division cycle protein 27 homolog OS=Homo sapiens OX=9606 GN=CDC27 PE=1 SV=2	P30260-2; P30260	0	2471.28		757821		499686		305620	62034.6	170531		Not Found	High	Not Found	High	Not Found	High	Peak Found	High	High	3.781e-05	2.313e-09	5.58	84.61
[-].MSSLGASFVQIK.[F]	1xMet-loss+Acetyl [N-Term]	1xMet-loss+Acetyl [N-Term]	0.000306854	9.16411e-05	1	3	4	Q9NYL2	Q9NYL2 [1-12]	Q9NYL2 1xMet-loss+Acetyl [N-Term]	Q9NYL2 1xMet-loss+Acetyl [N-Term]	Mitogen-activated protein kinase kinase kinase 20 OS=Homo sapiens OX=9606 GN=MAP3K20 PE=1 SV=3	Q9NYL2-3; Q9NYL2-2; Q9NYL2	0	1178.64				368905		236717		286225		Not Found	High	Not Found	High	Not Found	High	Not Found	High	High	3.781e-05	4.81e-05	3.15	76.73
[K].MSSNSNFSEVTLAGLASK.[E]	1xOxidation [M1]	1xOxidation [M1]	2.30572e-06	9.16411e-05	1	4	2	O95425-2	O95425-2 [972-989]			Isoform 2 of Supervillin OS=Homo sapiens OX=9606 GN=SVIL	O95425-2; O95425; O95425-3; O95425-4	0	1858.89									No Quan Values	High	Not Found	High	Not Found	Not Found	Not Found	Not Found	Not Found	High	3.781e-05	1.566e-07	3.44
[-].MSSVAVLTQESFAEHR.[S]	1xMet-loss+Acetyl [N-Term]	1xMet-loss+Acetyl [N-Term]	5.6344e-06	9.16411e-05	1	1	2	Q00341	Q00341 [1-16]	Q00341 1xMet-loss+Acetyl [N-Term]	Q00341 1xMet-loss+Acetyl [N-Term]	Vigilin OS=Homo sapiens OX=9606 GN=HDLBP PE=1 SV=2	Q00341	0	1702.84				247490		193714		66672.2		Not Found	Not Found	High	Peak Found	Not Found	High	Not Found	Peak Found	High	3.781e-05	4.461e-07	3.55	68.22
[-].MSTADALDDENTFK.[I]	1xMet-loss+Acetyl [N-Term]	1xMet-loss+Acetyl [N-Term]	1.46856e-05	9.16411e-05	1	2	2	P49959	P49959 [1-14]	P49959 1xMet-loss+Acetyl [N-Term]	P49959 1xMet-loss+Acetyl [N-Term]	Double-strand break repair protein MRE11 OS=Homo sapiens OX=9606 GN=MRE11 PE=1 SV=3	P49959-2; P49959	0	1468.64		415769				655468		174342		Not Found	High	Not Found	Not Found	Not Found	High	Not Found	Peak Found	High	3.781e-05	1.369e-06	3.34	65.62
[R].MSTANTDPFKDDLK.[I]	1xOxidation [M1]	1xOxidation [M1]	0.000447602	9.16411e-05	1	3	1	Q9BSJ2	Q9BSJ2 [561-574]			Gamma-tubulin complex component 2 OS=Homo sapiens OX=9606 GN=TUBGCP2 PE=1 SV=2	Q9BSJ2; Q9BSJ2-3; Q9BSJ2-4	1	1598.74				849508				83979.7		Not Found	Not Found	Not Found	High	Not Found	Not Found	Not Found	Peak Found	High	3.781e-05	7.527e-05	3.5	45.04
[R].MSTSPEAFLALR.[S]			5.13972e-05	9.16411e-05	1	2	2	P78527	P78527 [3890-3901]			DNA-dependent protein kinase catalytic subunit OS=Homo sapiens OX=9606 GN=PRKDC PE=1 SV=3	P78527-2; P78527	0	1322.68	152406		244746		246829					High	Not Found	Peak Found	Not Found	High	Not Found	Not Found	Not Found	High	3.781e-05	5.927e-06	2.32	69.79
[R].MSTSPEAFLALR.[S]	1xOxidation [M1]	1xOxidation [M1]	6.29427e-05	9.16411e-05	1	2	4	P78527	P78527 [3890-3901]			DNA-dependent protein kinase catalytic subunit OS=Homo sapiens OX=9606 GN=PRKDC PE=1 SV=3	P78527-2; P78527	0	1338.67	290165		495052		600288		198664			High	Not Found	High	Not Found	High	Not Found	High	Not Found	High	3.781e-05	7.562e-06	2.37	65.79
[R].MSVEADINGLR.[R]	1xOxidation [M1]	1xOxidation [M1]	0.000126753	9.16411e-05	1	2	4	P02533	P02533 [212-222]			Keratin, type I cytoskeletal 14 OS=Homo sapiens OX=9606 GN=KRT14 PE=1 SV=4	P02533; P08727	0	1220.59	693836		711145	246658	575255	176994	191527	195381		Peak Found	Not Found	High	Peak Found	High	Peak Found	Peak Found	High	High	3.781e-05	1.72e-05	2.88	51.37
[-].MSVLISQSVINYVEEENIPALK.[A]	1xMet-loss+Acetyl [N-Term]	1xMet-loss+Acetyl [N-Term]	1.31488e-05	9.16411e-05	1	3	2	Q9ULH0	Q9ULH0 [1-22]	Q9ULH0 1xMet-loss+Acetyl [N-Term]	Q9ULH0 1xMet-loss+Acetyl [N-Term]	Kinase D-interacting substrate of 220 kDa OS=Homo sapiens OX=9606 GN=KIDINS220 PE=1 SV=3	Q9ULH0-4; Q9ULH0-3; Q9ULH0	0	2387.27			370511							High	Not Found	High	Not Found	Not Found	Not Found	Not Found	Not Found	High	3.781e-05	1.209e-06	2.78	88.94
[R].MVADHLQFLHAECHNIIR.[Q]	1xCarbamidomethyl [C13]	1xCarbamidomethyl [C13]	3.89879e-05	9.16411e-05	1	2	1	Q13617	Q13617 [270-287]			Cullin-2 OS=Homo sapiens OX=9606 GN=CUL2 PE=1 SV=2	Q13617; Q13617-2	0	2204.09	195929	398660	168214	111913		374763		208509		Peak Found	High	Peak Found	Peak Found	Not Found	Peak Found	Not Found	Peak Found	High	3.781e-05	4.304e-06	3.69	53.47
[R].MSVTEGGIKYPETTEGGRPK.[L]			9.26553e-06	9.16411e-05	1	2	1	P24928	P24928 [34-53]			DNA-directed RNA polymerase II subunit RPB1 OS=Homo sapiens OX=9606 GN=POLR2A PE=1 SV=2	P24928; P24928-2	1	2137.06					252059					Not Found	Not Found	Not Found	Not Found	High	Not Found	Not Found	Not Found	High	3.781e-05	8.014e-07	3.57	42.59
[-].MSYTLDSLGNPSAYR.[R]	1xMet-loss+Acetyl [N-Term]	1xMet-loss+Acetyl [N-Term]	1.25539e-06	9.16411e-05	1	1	7	P07197	P07197 [1-15]	P07197 1xMet-loss+Acetyl [N-Term]	P07197 1xMet-loss+Acetyl [N-Term]	Neurofilament medium polypeptide OS=Homo sapiens OX=9606 GN=NEFM PE=1 SV=3	P07197	0	1585.75	271447		1.19471e+06	309644	835371	170482	903659	484772		High	Not Found	High	High	High	High	High	High	High	3.781e-05	7.726e-08	3.47	77.57
[R].MTGFELTEGVK.[T]	1xOxidation [M1]	1xOxidation [M1]	2.85048e-05	9.16411e-05	1	2	4	Q02413	Q02413 [651-661]			Desmoglein-1 OS=Homo sapiens OX=9606 GN=DSG1 PE=1 SV=2	Q02413-2; Q02413	0	1227.59	154565	639910	63754.6	236972	93029.8	386044	168974	200522		Peak Found	Peak Found	Peak Found	High	High	High	High	Peak Found	High	3.781e-05	2.981e-06	2.43	54.21
[R].MTMSSLVER.[A]	2xOxidation [M1; M3]	2xOxidation [M1; M3]	0.000412005	9.16411e-05	1	3	3	O95248-4	O95248-4 [1117-1125]			Isoform 4 of Myotubularin-related protein 5 OS=Homo sapiens OX=9606 GN=SBF1	O95248-5; O95248; O95248-4	0	1085.5	560185		233859		375548		198780			High	Not Found	Peak Found	Not Found	High	Not Found	High	Not Found	High	3.781e-05	6.783e-05	2.23	33.38
[-K].MTNAQIILLIDNAR.[M]			0.000119938	9.16411e-05	1	2	1	Q9C075	Q9C075 [138-151]			Keratin, type I cytoskeletal 23 OS=Homo sapiens OX=9606 GN=KRT23 PE=1 SV=2	Q9C075-2; Q9C075	0	1585.87				247270						Not Found	Not Found	Not Found	High	Not Found	Not Found	Not Found	Not Found	High	3.781e-05	1.607e-05	3.08	77.13
[K].MTNGFSGADLTEICQR.[A]	1xCarbamidomethyl [C14]; 1xDeamidated [N3]	1xCarbamidomethyl [C14]; 1xDeamidated [N3]	8.06983e-06	9.16411e-05	1	1	2	P55072	P55072 [678-693]			Transitional endoplasmic reticulum ATPase OS=Homo sapiens OX=9606 GN=VCP PE=1 SV=4	P55072	0	1800.79				1.36406e+06						Not Found	Not Found	Not Found	High	Not Found	Not Found	Not Found	High	High	3.781e-05	6.824e-07	2.96	67.49
[K].MTNGFSGADLTEICQR.[A]	1xCarbamidomethyl [C14]; 1xDeamidated [N3]; 1xOxidation [M1]	1xCarbamidomethyl [C14]; 1xDeamidated [N3]; 1xOxidation [M1]	1.6398e-06	9.16411e-05	1	1	1	P55072	P55072 [678-693]			Transitional endoplasmic reticulum ATPase OS=Homo sapiens OX=9606 GN=VCP PE=1 SV=4	P55072	0	1816.78									No Quan Values	Not Found	Not Found	Not Found	Not Found	Not Found	High	Not Found	Not Found	High	3.781e-05	1.054e-07	2.71
[R].MTQNPNYYNLQGISHR.[H]	1xOxidation [M1]	1xOxidation [M1]	3.4563e-08	9.16411e-05	1	1	1	O75643	O75643 [1764-1779]			U5 small nuclear ribonucleoprotein 200 kDa helicase OS=Homo sapiens OX=9606 GN=SNRNP200 PE=1 SV=2	O75643	0	1951.91	104910		707297		654117					Peak Found	Not Found	Peak Found	Not Found	High	Not Found	Not Found	Not Found	High	3.781e-05	1.153e-09	4.35	47.45
[-].MTTVVVHVDSK.[A]	1xMet-loss+Acetyl [N-Term]	1xMet-loss+Acetyl [N-Term]	0.000130304	9.16411e-05	1	3	1	Q9Y4B6	Q9Y4B6 [1-11]	Q9Y4B6 1xMet-loss+Acetyl [N-Term]	Q9Y4B6 1xMet-loss+Acetyl [N-Term]	DDB1- and CUL4-associated factor 1 OS=Homo sapiens OX=9606 GN=DCAF1 PE=1 SV=3	Q9Y4B6; Q9Y4B6-3; Q9Y4B6-2	0	1126.61			945684							Not Found	Not Found	High	Not Found	Not Found	Not Found	Not Found	Not Found	High	3.781e-05	1.771e-05	3.62	48.53
[R].MTVAHMWFDNQIHEADTTENQSGVSFDK.[T]	2xOxidation [M1; M6]	2xOxidation [M1; M6]	4.9538e-05	9.16411e-05	1	4	1	P05023	P05023 [386-413]			Sodium/potassium-transporting ATPase subunit alpha-1 OS=Homo sapiens OX=9606 GN=ATP1A1 PE=1 SV=1	P05023-2; P05023; P05023-4; P05023-3	0	3270.41									No Quan Values	Not Found	Not Found	Not Found	High	Not Found	Not Found	Not Found	Not Found	High	3.781e-05	5.688e-06	3.96
[R].MSYLLLPLDSSK.[S]	1xOxidation [M1]	1xOxidation [M1]	4.9538e-05	9.16411e-05	1	3	3	O95248-4	O95248-4 [765-776]			Isoform 4 of Myotubularin-related protein 5 OS=Homo sapiens OX=9606 GN=SBF1	O95248-5; O95248; O95248-4	0	1382.72	456347		492265	363339	455128	389953	183697			High	Not Found	Peak Found	Peak Found	High	Peak Found	High	Not Found	High	3.781e-05	5.685e-06	3.02	73.59
[R].MPIYGTAQPSAK.[A]			1.1347e-05	9.16411e-05	1	1	2	Q9ULE6	Q9ULE6 [512-523]			Paladin OS=Homo sapiens OX=9606 GN=PALD1 PE=1 SV=3	Q9ULE6	0	1263.64				287498				479533		Not Found	High	Not Found	Peak Found	Not Found	Not Found	Not Found	High	High	3.781e-05	1.012e-06	2.81	44.53
[K].MPITDADQIR.[A]			0.000142876	9.16411e-05	1	3	1	Q9Y4B6	Q9Y4B6 [746-755]			DDB1- and CUL4-associated factor 1 OS=Homo sapiens OX=9606 GN=DCAF1 PE=1 SV=3	Q9Y4B6; Q9Y4B6-3; Q9Y4B6-2	0	1159.58			558969			126981				Not Found	Not Found	High	Not Found	Not Found	Peak Found	Not Found	Not Found	High	3.781e-05	1.975e-05	2.71	49.27
[K].MPIEGSENPERPFLEK.[A]	1xOxidation [M1]	1xOxidation [M1]	1.26731e-05	9.16411e-05	1	1	1	O60563	O60563 [439-454]			Cyclin-T1 OS=Homo sapiens OX=9606 GN=CCNT1 PE=1 SV=1	O60563	0	1888.91		529892	94897.3		184666	439410		44541.4		Not Found	Peak Found	Peak Found	Not Found	Peak Found	High	Not Found	Peak Found	High	3.781e-05	1.158e-06	3.82	47.81
[R].MGYQCTFGVLQAGQYGVAQTR.[R]	1xCarbamidomethyl [C5]; 1xOxidation [M1]	1xCarbamidomethyl [C5]; 1xOxidation [M1]	9.69989e-07	9.16411e-05	2	3	2	P26358; P26358-2	P26358 [1290-1310]; P26358-2 [1306-1326]			DNA (cytosine-5)-methyltransferase 1 OS=Homo sapiens OX=9606 GN=DNMT1 PE=1 SV=2 Isoform 2 of DNA (cytosine-5)-methyltransferase 1 OS=Homo sapiens OX=9606 GN=DNMT1	P26358-3; P26358; P26358-2	0	2351.09	500023		758242						Shared	High	Not Found	High	Not Found	Not Found	Not Found	Not Found	Not Found	High	3.781e-05	5.7e-08	3.92	68.13
[R].MHNQIPQVTSDGK.[R]	1xOxidation [M1]	1xOxidation [M1]	0.000460137	9.16411e-05	1	3	2	Q92499	Q92499 [387-399]			ATP-dependent RNA helicase DDX1 OS=Homo sapiens OX=9606 GN=DDX1 PE=1 SV=2	Q92499; Q92499-3; Q92499-2	0	1470.7						1.47549e+06		1.86483e+06		Not Found	Not Found	Not Found	Not Found	Not Found	High	Not Found	High	High	3.781e-05	7.775e-05	2.62	33.05
[R].MHPSLSHSEALASPAK.[D]	1xOxidation [M1]	1xOxidation [M1]	2.95678e-06	9.16411e-05	1	2	2	Q6R327	Q6R327 [1341-1356]			Rapamycin-insensitive companion of mTOR OS=Homo sapiens OX=9606 GN=RICTOR PE=1 SV=1	Q6R327; Q6R327-3	0	1678.82	210955		287948		83964.7		58642.6			High	Not Found	High	Not Found	Peak Found	Not Found	Peak Found	Not Found	High	3.781e-05	2.111e-07	3.61	33.4
[R].MHWSNVGGLSGMILTLK.[E]	1xOxidation [M12]	1xOxidation [M12]	0.000543074	9.16411e-05	1	3	3	Q9BQ52	Q9BQ52 [113-129]			Zinc phosphodiesterase ELAC protein 2 OS=Homo sapiens OX=9606 GN=ELAC2 PE=1 SV=2	Q9BQ52-4; Q9BQ52-2; Q9BQ52	0	1859.95		474060		340842		164489		170722		Not Found	High	Not Found	High	Not Found	Peak Found	Not Found	High	High	3.781e-05	9.44e-05	2.29	68.17
[R].MKDQGPDKENSGAIEASVK.[L]	1xOxidation [M1]	1xOxidation [M1]	2.00768e-07	9.16411e-05	1	4	4	Q69YN4	Q69YN4 [366-384]			Protein virilizer homolog OS=Homo sapiens OX=9606 GN=VIRMA PE=1 SV=2	Q69YN4-4; Q69YN4-3; Q69YN4-2; Q69YN4	2	2019.97	767603		1.03752e+06				43481.3			High	Not Found	High	Not Found	High	Not Found	Peak Found	Not Found	High	3.781e-05	8.986e-09	4.85	32.08
[-].MKPGATGESDLAEVLPQHK.[F]	1xOxidation [M1]	1xOxidation [M1]	0.000250579	9.16411e-05	1	2	1	Q709F0	Q709F0 [1-19]			Acyl-CoA dehydrogenase family member 11 OS=Homo sapiens OX=9606 GN=ACAD11 PE=1 SV=3	Q709F0-2; Q709F0	0	2024.01									No Quan Values	Not Found	Not Found	Not Found	Not Found	Not Found	High	Not Found	Not Found	High	3.781e-05	3.82e-05	2.65
[R].MLALALLDR.[I]			0.000477399	9.16411e-05	1	1	4	Q92621	Q92621 [1494-1502]			Nuclear pore complex protein Nup205 OS=Homo sapiens OX=9606 GN=NUP205 PE=1 SV=3	Q92621	0	1015.6	4.50787e+06		6.21307e+06		2.51247e+06		864567			High	Not Found	High	Not Found	High	Not Found	High	Not Found	High	3.781e-05	8.106e-05	2.83	73.86
[R].MLALALLDR.[I]	1xOxidation [M1]	1xOxidation [M1]	0.000362174	9.16411e-05	1	1	5	Q92621	Q92621 [1494-1502]			Nuclear pore complex protein Nup205 OS=Homo sapiens OX=9606 GN=NUP205 PE=1 SV=3	Q92621	0	1031.59	9.25251e+06		7.07261e+06		4.31804e+06		2.95694e+06			High	Not Found	High	Not Found	High	Not Found	High	Not Found	High	3.781e-05	5.845e-05	2.55	67.59
[R].MIAILTENYGGK.[W]			7.70816e-05	9.16411e-05	1	2	5	P26639	P26639 [600-611]			Threonine--tRNA ligase 1, cytoplasmic OS=Homo sapiens OX=9606 GN=TARS1 PE=1 SV=3	P26639; P26639-2	0	1309.68		5.00023e+06		738676		3424125		1.36149e+06		Not Found	High	Not Found	High	Not Found	High	Not Found	High	High	3.781e-05	9.564e-06	3.41	62.85
[K].MGVIQDVLGEEQR.[F]	1xOxidation [M1]	1xOxidation [M1]	1.97151e-06	9.16411e-05	1	1	1	Q9NRY4	Q9NRY4 [517-529]			Rho GTPase-activating protein 35 OS=Homo sapiens OX=9606 GN=ARHGAP35 PE=1 SV=3	Q9NRY4	0	1489.73			421074							Not Found	Not Found	High	Not Found	Not Found	Not Found	Not Found	Not Found	High	3.781e-05	1.301e-07	3.68	62.4
[R].MIAILTENYGGK.[W]	1xOxidation [M1]	1xOxidation [M1]	1.31488e-05	9.16411e-05	1	2	5	P26639	P26639 [600-611]			Threonine--tRNA ligase 1, cytoplasmic OS=Homo sapiens OX=9606 GN=TARS1 PE=1 SV=3	P26639; P26639-2	0	1325.68		5601974		851919		5482903		1711481		Not Found	High	Not Found	High	Not Found	High	Not Found	High	High	3.781e-05	1.205e-06	3.32	57.11
[R].MLAIYDGFDGFAK.[G]	1xOxidation [M1]	1xOxidation [M1]	9.26553e-06	9.16411e-05	1	2	2	Q01813	Q01813 [443-455]			ATP-dependent 6-phosphofructokinase, platelet type OS=Homo sapiens OX=9606 GN=PFKP PE=1 SV=2	Q01813; Q01813-2	0	1463.69						2.22218e+06		300633		Not Found	High	Not Found	Not Found	Not Found	High	Not Found	Peak Found	High	3.781e-05	7.977e-07	3.46	73.91
[R].MLATLEPEQR.[A]	1xOxidation [M1]	1xOxidation [M1]	0.000646876	9.16411e-05	1	2	2	P54886	P54886 [376-385]			Delta-1-pyrroline-5-carboxylate synthase OS=Homo sapiens OX=9606 GN=ALDH18A1 PE=1 SV=2	P54886; P54886-2	0	1203.6		2.30781e+06				6479974		708083		Not Found	High	Not Found	Not Found	Not Found	High	Not Found	Peak Found	High	3.781e-05	0.0001153	2.99	44.3
[R].MICDVEISAK.[E]	1xCarbamidomethyl [C3]; 1xOxidation [M1]	1xCarbamidomethyl [C3]; 1xOxidation [M1]	0.000144198	9.16411e-05	1	1	1	P09884	P09884 [689-698]			DNA polymerase alpha catalytic subunit OS=Homo sapiens OX=9606 GN=POLA1 PE=1 SV=2	P09884	0	1181.55	581393		1.14681e+06		1.50774e+06			891349		Peak Found	Not Found	High	Not Found	Peak Found	Not Found	Not Found	Peak Found	High	3.781e-05	1.995e-05	2.68	46.18
[K].MICQQVEAIK.[K]	1xCarbamidomethyl [C3]; 1xOxidation [M1]	1xCarbamidomethyl [C3]; 1xOxidation [M1]	0.000336453	9.16411e-05	1	1	2	P49792	P49792 [813-822]			E3 SUMO-protein ligase RanBP2 OS=Homo sapiens OX=9606 GN=RANBP2 PE=1 SV=2	P49792	0	1235.61	141458		612301		346790		88742.4			Peak Found	Not Found	High	Not Found	Peak Found	Not Found	High	Not Found	High	3.781e-05	5.351e-05	2.44	42.89
[R].MLDDYEEISAGDEGEFR.[Q]	1xOxidation [M1]	1xOxidation [M1]	2.5282e-06	9.16411e-05	1	4	1	Q14999	Q14999 [385-401]			Cullin-7 OS=Homo sapiens OX=9606 GN=CUL7 PE=1 SV=2	Q14999; Q14999-2; Q8IWT3-3; Q8IWT3	0	1991.82									No Quan Values	Not Found	Not Found	High	Not Found	Not Found	Not Found	Not Found	Not Found	High	3.781e-05	1.756e-07	3.59
[R].MLDILAEYLK.[Y]	1xOxidation [M1]	1xOxidation [M1]	2.79845e-05	9.16411e-05	1	2	4	O14646	O14646 [816-825]			Chromodomain-helicase-DNA-binding protein 1 OS=Homo sapiens OX=9606 GN=CHD1 PE=1 SV=2	O14646-2; O14646	0	1224.65	77720.8		133273		120422		183298			High	Not Found	High	Not Found	High	Not Found	High	Not Found	High	3.781e-05	2.922e-06	2.9	78.08
[K].MLDLLEDFLEHEGYK.[Y]	1xOxidation [M1]	1xOxidation [M1]	1.99023e-05	9.16411e-05	1	2	3	Q14839	Q14839 [1078-1092]			Chromodomain-helicase-DNA-binding protein 4 OS=Homo sapiens OX=9606 GN=CHD4 PE=1 SV=2	Q14839-2; Q14839	0	1867.88			300856		153518		98078.5			Not Found	Not Found	High	Not Found	High	Not Found	High	Not Found	High	3.781e-05	1.955e-06	5.53	84.32
[R].MLDNDSILVDAIR.[K]			6.17806e-06	9.16411e-05	1	1	3	O75175	O75175 [189-201]			CCR4-NOT transcription complex subunit 3 OS=Homo sapiens OX=9606 GN=CNOT3 PE=1 SV=1	O75175	0	1474.76		291639		353206				239495		Not Found	High	Not Found	High	Not Found	Not Found	Not Found	High	High	3.781e-05	4.951e-07	3.1	74.7
[R].MLDNDSILVDAIR.[K]	1xOxidation [M1]	1xOxidation [M1]	2.28402e-07	9.16411e-05	1	1	3	O75175	O75175 [189-201]			CCR4-NOT transcription complex subunit 3 OS=Homo sapiens OX=9606 GN=CNOT3 PE=1 SV=1	O75175	0	1490.75				1.82159e+06		976035		503388		Not Found	Not Found	Not Found	High	Not Found	High	Not Found	High	High	3.781e-05	1.049e-08	4.03	70.36
[R].MLAITANTLR.[Q]	1xOxidation [M1]	1xOxidation [M1]	0.000199046	9.16411e-05	1	6	4	O60313-10	O60313-10 [941-950]			Isoform 4 of Dynamin-like 120 kDa protein, mitochondrial OS=Homo sapiens OX=9606 GN=OPA1	O60313-9; O60313; O60313-10; O60313-2; O60313-11; O60313-13	0	1119.62		2650466		1.61643e+06		842794		1.18458e+06		Not Found	High	Not Found	High	Not Found	High	Not Found	High	High	3.781e-05	2.919e-05	2.88	51.37
[K].MIELLADNINLGDPSSMLK.[M]	1xOxidation [M17]	1xOxidation [M17]	6.71042e-07	9.16411e-05	1	1	1	Q9H583	Q9H583 [664-682]			HEAT repeat-containing protein 1 OS=Homo sapiens OX=9606 GN=HEATR1 PE=1 SV=3	Q9H583	0	2090.05					241292					Not Found	Not Found	Not Found	Not Found	High	Not Found	Not Found	Not Found	High	3.781e-05	3.699e-08	4.03	82.21
[R].MGPNLQLIEGDAK.[Q]	1xOxidation [M1]	1xOxidation [M1]	1.68575e-06	9.16411e-05	1	3	3	Q9H9E3	Q9H9E3 [80-92]			Conserved oligomeric Golgi complex subunit 4 OS=Homo sapiens OX=9606 GN=COG4 PE=1 SV=3	Q9H9E3-3; Q9H9E3; Q9H9E3-2	0	1401.7		835804		581590		326968		210275		Not Found	High	Not Found	High	Not Found	Peak Found	Not Found	High	High	3.781e-05	1.086e-07	4.26	58.24
[K].MGPFLTSQEK.[E]	1xOxidation [M1]	1xOxidation [M1]	0.000165561	9.16411e-05	1	3	5	Q9P2K8	Q9P2K8 [321-330]			eIF-2-alpha kinase GCN2 OS=Homo sapiens OX=9606 GN=EIF2AK4 PE=1 SV=3	Q9P2K8-2; Q9P2K8-3; Q9P2K8	0	1153.56	110229	1.04137e+06	1.61908e+06		317851		1198583	187976		Peak Found	Peak Found	High	Not Found	High	Not Found	High	Peak Found	High	3.781e-05	2.343e-05	2.95	42.76
[K].MFLGDNAHLSIINEYLSQSYQK.[F]			3.15444e-05	9.16411e-05	1	1	2	P46940	P46940 [1240-1261]			Ras GTPase-activating-like protein IQGAP1 OS=Homo sapiens OX=9606 GN=IQGAP1 PE=1 SV=1	P46940	0	2571.25									No Quan Values	Not Found	Not Found	High	Not Found	Not Found	Not Found	High	Not Found	High	3.781e-05	3.363e-06	3.09
[K].MFLGDNAHLSIINEYLSQSYQK.[F]	1xOxidation [M1]	1xOxidation [M1]	1.25508e-07	9.16411e-05	1	1	5	P46940	P46940 [1240-1261]			Ras GTPase-activating-like protein IQGAP1 OS=Homo sapiens OX=9606 GN=IQGAP1 PE=1 SV=1	P46940	0	2587.25	88106.4		755736		347620		730273			High	Not Found	High	Not Found	High	Not Found	High	Not Found	High	3.781e-05	5.166e-09	5.52	76.66
[R].MFQSTAGSGGVQEDALMAVSTLVEVLGGEFLK.[Y]	1xOxidation [M1]	1xOxidation [M1]	9.78242e-10	9.16411e-05	1	2	4	Q14974	Q14974 [614-645]			Importin subunit beta-1 OS=Homo sapiens OX=9606 GN=KPNB1 PE=1 SV=2	Q14974; Q14974-2	0	3287.62		2.1613e+06	757045	922430	107668	1.71341e+06		357917		Not Found	High	Peak Found	Peak Found	Peak Found	High	Not Found	High	High	3.781e-05	1.763e-11	6.62	89.1
[R].MFQSTAGSGGVQEDALMAVSTLVEVLGGEFLK.[Y]	2xOxidation [M1; M17]	2xOxidation [M1; M17]	4.15547e-08	9.16411e-05	1	2	7	Q14974	Q14974 [614-645]			Importin subunit beta-1 OS=Homo sapiens OX=9606 GN=KPNB1 PE=1 SV=2	Q14974; Q14974-2	0	3303.61		6126539		2572660		400068		1.70031e+06		Not Found	High	Not Found	High	Not Found	High	Not Found	High	High	3.781e-05	1.43e-09	4.88	89.1
[K].MGAPESGLAEYLFDK.[H]			3.79253e-05	9.16411e-05	1	1	9	P02794	P02794 [159-173]			Ferritin heavy chain OS=Homo sapiens OX=9606 GN=FTH1 PE=1 SV=2	P02794	0	1627.77	200454		599817	166744	1.6094e+06	105846	228396	314312		High	Not Found	High	High	High	Peak Found	High	High	High	3.781e-05	4.188e-06	4.64	76.68
[K].MGAPESGLAEYLFDK.[H]	1xOxidation [M1]	1xOxidation [M1]	6.06529e-06	9.16411e-05	1	1	8	P02794	P02794 [159-173]			Ferritin heavy chain OS=Homo sapiens OX=9606 GN=FTH1 PE=1 SV=2	P02794	0	1643.76					4457603					High	Not Found	High	Not Found	High	Not Found	High	Not Found	High	3.781e-05	4.855e-07	3.51	73.58
[-].MGDDSEWLKLPVDQK.[C]	1xMet-loss+Acetyl [N-Term]	1xMet-loss+Acetyl [N-Term]	0.000197221	9.16411e-05	1	3	3	Q14008	Q14008 [1-15]	Q14008 1xMet-loss+Acetyl [N-Term]	Q14008 1xMet-loss+Acetyl [N-Term]	Cytoskeleton-associated protein 5 OS=Homo sapiens OX=9606 GN=CKAP5 PE=1 SV=3	Q14008-2; Q14008; Q14008-3	1	1671.82	124824		261596		1.47398e+06					High	Not Found	High	Not Found	High	Not Found	Not Found	Not Found	High	3.781e-05	2.876e-05	4.34	75.62
[K].MGDSTLEEMIQQHQEWLEDLVIR.[L]	2xOxidation [M1; M9]	2xOxidation [M1; M9]	1.52367e-05	9.16411e-05	1	1	1	O14981	O14981 [323-345]			TATA-binding protein-associated factor 172 OS=Homo sapiens OX=9606 GN=BTAF1 PE=1 SV=2	O14981	0	2832.32	214932						75702.5			High	Not Found	Not Found	Not Found	Not Found	Not Found	Peak Found	Not Found	High	3.781e-05	1.427e-06	4.31	84.92
[K].MGDSTLEEMIQQHQEWLEDLVIR.[L]	1xDeamidated [Q12]; 2xOxidation [M1; M9]	1xDeamidated [Q12]; 2xOxidation [M1; M9]	0.000155224	9.16411e-05	1	1	1	O14981	O14981 [323-345]			TATA-binding protein-associated factor 172 OS=Homo sapiens OX=9606 GN=BTAF1 PE=1 SV=2	O14981	0	2833.3									No Quan Values	High	Not Found	Not Found	Not Found	Not Found	Not Found	Not Found	Not Found	High	3.781e-05	2.16e-05	4.6
[R].MGPLGLDHMASSIER.[M]	2xOxidation [M1; M9]	2xOxidation [M1; M9]	1.15551e-06	9.16411e-05	1	2	2	P52272	P52272 [457-471]			Heterogeneous nuclear ribonucleoprotein M OS=Homo sapiens OX=9606 GN=HNRNPM PE=1 SV=3	P52272-2; P52272	0	1645.77			315787	1.1796e+06				355174		Not Found	Not Found	High	High	Not Found	Not Found	Not Found	Peak Found	High	3.781e-05	6.959e-08	3.9	45.45
[R].MGFPATTFQDIQR.[G]	1xOxidation [M1]	1xOxidation [M1]	0.000252897	9.16411e-05	1	2	3	Q9H9E3	Q9H9E3 [499-511]			Conserved oligomeric Golgi complex subunit 4 OS=Homo sapiens OX=9606 GN=COG4 PE=1 SV=3	Q9H9E3-3; Q9H9E3	0	1527.73	217524	741913	315036	382300	275524	268235	340010	281241		Peak Found	Peak Found	Peak Found	High	Peak Found	High	Peak Found	High	High	3.781e-05	3.836e-05	2.51	62.18
[R].MGGEEAEIR.[F]	1xOxidation [M1]	1xOxidation [M1]	0.00060095	9.16411e-05	1	1	2	Q08211	Q08211 [930-938]			ATP-dependent RNA helicase A OS=Homo sapiens OX=9606 GN=DHX9 PE=1 SV=4	Q08211	0	1007.45	156109		890690		264402		97903.1			Peak Found	Not Found	Peak Found	Not Found	High	Not Found	High	Not Found	High	3.781e-05	0.0001065	1.88	30.96
[R].MGGGGAMNMGDPYGSGGQK.[F]	1xOxidation [M9]	1xOxidation [M1; M9]	7.16059e-05	9.16411e-05	1	2	1	P23246	P23246 [612-630]			Splicing factor, proline- and glutamine-rich OS=Homo sapiens OX=9606 GN=SFPQ PE=1 SV=2	P23246; P23246-2	0	1787.71								128080		Not Found	Not Found	Not Found	Not Found	Not Found	Not Found	Not Found	High	High	3.781e-05	8.754e-06	2.7	39.91
[R].MGGGGAMNMGDPYGSGGQK.[F]	2xOxidation [M7; M]	2xOxidation [M1; M7; M9]	6.06529e-06	9.16411e-05	1	2	4	P23246	P23246 [612-630]			Splicing factor, proline- and glutamine-rich OS=Homo sapiens OX=9606 GN=SFPQ PE=1 SV=2	P23246; P23246-2	0	1803.71				328988				1.15665e+06		Not Found	Not Found	Not Found	High	Not Found	Not Found	Not Found	High	High	3.781e-05	4.854e-07	4.03	33.49
[R].MGLAISLVATEK.[E]			0.000118839	9.16411e-05	1	3	3	Q92499	Q92499 [612-623]			ATP-dependent RNA helicase DDX1 OS=Homo sapiens OX=9606 GN=DDX1 PE=1 SV=2	Q92499; Q92499-3; Q92499-2	0	1232.69		939104		205278		382877		431518		Not Found	High	Not Found	Peak Found	Not Found	High	Not Found	High	High	3.781e-05	1.581e-05	3.46	67.93
[R].MGLAISLVATEK.[E]	1xOxidation [M1]	1xOxidation [M1]	1.62516e-05	9.16411e-05	1	3	5	Q92499	Q92499 [612-623]			ATP-dependent RNA helicase DDX1 OS=Homo sapiens OX=9606 GN=DDX1 PE=1 SV=2	Q92499; Q92499-3; Q92499-2	0	1248.69		3473852		1.07851e+06		3.26706e+06		1.82945e+06		Not Found	High	Not Found	High	Not Found	High	Not Found	High	High	3.781e-05	1.543e-06	3.99	62.31
[R].MGLAMGGGGGASFDR.[A]	2xOxidation [M1; M5]	2xOxidation [M1; M5]	4.81771e-06	9.16411e-05	1	2	3	P52272	P52272 [607-621]			Heterogeneous nuclear ribonucleoprotein M OS=Homo sapiens OX=9606 GN=HNRNPM PE=1 SV=3	P52272-2; P52272	0	1415.6		213305	309584	702711		202868		159244		Not Found	Peak Found	High	High	Not Found	High	Not Found	Peak Found	High	3.781e-05	3.706e-07	3.96	42.07
[K].MGLDGLQQDYIR.[K]	1xOxidation [M1]	1xOxidation [M1]	6.23523e-06	9.16411e-05	1	9	2	P98194	P98194 [437-448]			Calcium-transporting ATPase type 2C member 1 OS=Homo sapiens OX=9606 GN=ATP2C1 PE=1 SV=3	P98194-8; P98194; P98194-5; P98194-6; P98194-2; P98194-4; P98194-3; P98194-7; P98194-9	0	1424.68		655298		428684				341437		Not Found	High	Not Found	Peak Found	Not Found	Not Found	Not Found	High	High	3.781e-05	5.051e-07	3.14	60.9
[R].MGPAMGPALGAGIER.[M]	2xOxidation [M1; M5]	2xOxidation [M1; M5]	5.58396e-05	9.16411e-05	1	2	1	P52272	P52272 [592-606]			Heterogeneous nuclear ribonucleoprotein M OS=Homo sapiens OX=9606 GN=HNRNPM PE=1 SV=3	P52272-2; P52272	0	1459.7			601442							Not Found	Not Found	High	Not Found	Not Found	Not Found	Not Found	Not Found	High	3.781e-05	6.571e-06	3.32	48.38
[K].MGPFLTSQEK.[E]			0.000548097	9.16411e-05	1	3	3	Q9P2K8	Q9P2K8 [321-330]			eIF-2-alpha kinase GCN2 OS=Homo sapiens OX=9606 GN=EIF2AK4 PE=1 SV=3	Q9P2K8-2; Q9P2K8-3; Q9P2K8	0	1137.56	107510		1.10331e+06		206399		684993			Peak Found	Not Found	High	Not Found	Peak Found	Not Found	High	Not Found	High	3.781e-05	9.558e-05	2.49	50.02
[R].MGFTEVTPVTGASLR.[R]	1xOxidation [M1]	1xOxidation [M1]	2.57521e-06	9.16411e-05	1	3	4	P55265	P55265 [802-816]			Double-stranded RNA-specific adenosine deaminase OS=Homo sapiens OX=9606 GN=ADAR PE=1 SV=4	P55265-4; P55265; P55265-5	0	1581.79				641943				150134		Not Found	High	Not Found	High	Not Found	High	Not Found	High	High	3.781e-05	1.788e-07	3.57	60.3
[R].MVSEQCHLLSQFFR.[E]	1xCarbamidomethyl [C6]; 1xOxidation [M1]	1xCarbamidomethyl [C6]; 1xOxidation [M1]	2.34915e-05	9.16411e-05	1	4	4	Q6YHU6	Q6YHU6 [1874-1887]			Thyroid adenoma-associated protein OS=Homo sapiens OX=9606 GN=THADA PE=1 SV=1	Q6YHU6-2; Q6YHU6-3; Q6YHU6-4; Q6YHU6	0	1797.84	296228		360810		173551		98560			High	Not Found	High	Not Found	High	Not Found	High	Not Found	High	3.781e-05	2.373e-06	3.82	65.57
[R].MLFDLLVNCK.[N]	1xCarbamidomethyl [C9]; 1xOxidation [M1]	1xCarbamidomethyl [C9]; 1xOxidation [M1]	0.000111418	9.16411e-05	1	1	1	Q9H583	Q9H583 [1130-1139]			HEAT repeat-containing protein 1 OS=Homo sapiens OX=9606 GN=HEATR1 PE=1 SV=3	Q9H583	0	1268.64					98513.7					Not Found	Not Found	Not Found	Not Found	High	Not Found	Not Found	Not Found	High	3.781e-05	1.473e-05	2.48	75.64
[R].MLFESLHHGLDDIQTLIK.[T]	1xOxidation [M1]	1xOxidation [M1]	0.000568657	9.16411e-05	1	1	4	Q7Z2T5	Q7Z2T5 [544-561]			TRMT1-like protein OS=Homo sapiens OX=9606 GN=TRMT1L PE=1 SV=2	Q7Z2T5	0	2126.1		471340	116415	575063		226727		305846		Not Found	High	Peak Found	High	Not Found	High	Not Found	High	High	3.781e-05	9.954e-05	4.03	73.44
[K].MLTVPHITCDPPEER.[R]	1xCarbamidomethyl [C9]	1xCarbamidomethyl [C9]	4.59973e-07	9.16411e-05	1	2	15	P51787	P51787 [437-451]			Potassium voltage-gated channel subfamily KQT member 1 OS=Homo sapiens OX=9606 GN=KCNQ1 PE=1 SV=3	P51787; P51787-2	0	1794.85	4.03287e+07	282452368	2.09723e+07	8.17804e+07	7.61857e+06	20594668				High	High	High	High	High	High	Not Found	Not Found	High	3.781e-05	2.379e-08	3.58	54.77
[K].MLTVPHITCDPPEER.[R]	1xCarbamidomethyl [C9]; 1xOxidation [M1]	1xCarbamidomethyl [C9]; 1xOxidation [M1]	3.78887e-09	9.16411e-05	1	2	19	P51787	P51787 [437-451]			Potassium voltage-gated channel subfamily KQT member 1 OS=Homo sapiens OX=9606 GN=KCNQ1 PE=1 SV=3	P51787; P51787-2	0	1810.85	86488617	6.59927e+08	67832746	2.6178e+08	1.68639e+07	107514565		97609		High	High	High	High	High	High	Not Found	Peak Found	High	3.781e-05	8.63e-11	3.88	51.78
[K].MIVDPVEPHGEMK.[F]	2xOxidation [M1; M12]	2xOxidation [M1; M12]	3.58862e-05	9.16411e-05	1	2	2	Q13263	Q13263 [378-390]			Transcription intermediary factor 1-beta OS=Homo sapiens OX=9606 GN=TRIM28 PE=1 SV=5	Q13263; Q13263-2	0	1513.7	168263			284929	138716	513589		508782		Peak Found	Not Found	Not Found	Peak Found	Peak Found	High	Not Found	High	High	3.781e-05	3.927e-06	3.21	38.27
[R].MIVLPPLTDQTGTQLIFTAAK.[E]	1xOxidation [M1]	1xOxidation [M1]	0.000127926	9.16411e-05	1	2	1	O14795	O14795 [1307-1327]			Protein unc-13 homolog B OS=Homo sapiens OX=9606 GN=UNC13B PE=1 SV=2	O14795-2; O14795	0	2274.24									No Quan Values	Not Found	Not Found	High	Not Found	Not Found	Not Found	Not Found	Not Found	High	3.781e-05	1.728e-05	4.59
[R].MLVTFDEELRPLPVSVR.[V]			0.000612117	9.16411e-05	1	3	3	Q13200	Q13200 [829-845]			26S proteasome non-ATPase regulatory subunit 2 OS=Homo sapiens OX=9606 GN=PSMD2 PE=1 SV=3	Q13200; Q13200-2; Q13200-3	0	2001.08				1.72967e+06		216683		228179		Not Found	Not Found	Not Found	High	Not Found	High	Not Found	High	High	3.781e-05	0.0001087	3.41	73.94
[R].MMALQTDIVDLQR.[S]	2xOxidation [M1; M2]	2xOxidation [M1; M2]	3.58862e-05	9.16411e-05	1	3	4	O14920	O14920 [537-549]			Inhibitor of nuclear factor kappa-B kinase subunit beta OS=Homo sapiens OX=9606 GN=IKBKB PE=1 SV=1	O14920-2; O14920; O14920-4	0	1565.77		426964		487121		255333		313502		Not Found	High	Not Found	High	Not Found	High	Not Found	High	High	3.781e-05	3.923e-06	3.08	61.4
[R].MMGLEVLGEK.[K]	1xOxidation [M]	1xOxidation [M1; M2]	0.000412005	9.16411e-05	1	3	8	Q08J23	Q08J23 [701-710]			RNA cytosine C(5)-methyltransferase NSUN2 OS=Homo sapiens OX=9606 GN=NSUN2 PE=1 SV=2	Q08J23-3; Q08J23; Q08J23-2	0	1122.55	46382.1	2.47643e+06		1.07724e+06		355608		1.4793e+06		Peak Found	High	Not Found	High	Not Found	High	Not Found	High	High	3.781e-05	6.784e-05	2.72	57.56
[R].MMGLEVLGEK.[K]	2xOxidation [M1; M2]	2xOxidation [M1; M2]	0.000439435	9.16411e-05	1	3	4	Q08J23	Q08J23 [701-710]			RNA cytosine C(5)-methyltransferase NSUN2 OS=Homo sapiens OX=9606 GN=NSUN2 PE=1 SV=2	Q08J23-3; Q08J23; Q08J23-2	0	1138.55		7.31906e+06		4.79502e+06		2673974		2.55934e+06		Not Found	Peak Found	Not Found	High	Not Found	High	Not Found	High	High	3.781e-05	7.356e-05	3.18	50.71
[-].MMIPSQISYPASQGAYYIPGQGR.[S]	1xMet-loss [N-Term]	1xMet-loss [N-Term]	0.000135194	9.16411e-05	1	1	3	Q04637-4	Q04637-4 [1-23]	Q04637-4 1xMet-loss [N-Term]	Q04637-4 1xMet-loss [N-Term]	Isoform C of Eukaryotic translation initiation factor 4 gamma 1 OS=Homo sapiens OX=9606 GN=EIF4G1	Q04637-4	0	2384.17	306279		344608		144161		129774	152768		High	Not Found	High	Not Found	High	Not Found	Peak Found	Peak Found	High	3.781e-05	1.855e-05	3.08	70.67
[K].MITGDSQETAVAIASR.[L]	1xOxidation [M1]	1xOxidation [M1]	4.27296e-07	9.16411e-05	1	9	1	P98194	P98194 [568-583]			Calcium-transporting ATPase type 2C member 1 OS=Homo sapiens OX=9606 GN=ATP2C1 PE=1 SV=3	P98194-8; P98194; P98194-5; P98194-6; P98194-2; P98194-4; P98194-3; P98194-7; P98194-9	0	1665.81									No Quan Values	Not Found	Not Found	Not Found	Not Found	Not Found	Not Found	Not Found	High	High	3.781e-05	2.177e-08	2.87
[-].MMIPSQISYPASQGAYYIPGQGR.[S]	1xOxidation [M2]; 1xMet-loss+Acetyl [N-Term]	1xOxidation [M2]; 1xMet-loss+Acetyl [N-Term]	1.65457e-07	9.16411e-05	1	1	5	Q04637-4	Q04637-4 [1-23]	Q04637-4 1xMet-loss+Acetyl [N-Term]	Q04637-4 1xMet-loss+Acetyl [N-Term]	Isoform C of Eukaryotic translation initiation factor 4 gamma 1 OS=Homo sapiens OX=9606 GN=EIF4G1	Q04637-4	0	2442.18	380023		456483		237378	102448				High	Not Found	High	Not Found	High	Peak Found	High	Not Found	High	3.781e-05	7.143e-09	4.28	82.64
[R].MNAEFIMLNHFSQR.[Y]			3.7233e-05	9.16411e-05	1	3	2	Q9BQ52	Q9BQ52 [715-728]			Zinc phosphodiesterase ELAC protein 2 OS=Homo sapiens OX=9606 GN=ELAC2 PE=1 SV=2	Q9BQ52-4; Q9BQ52-3; Q9BQ52	0	1737.82									No Quan Values	Not Found	High	Not Found	High	Not Found	Not Found	Not Found	Not Found	High	3.781e-05	4.073e-06	2.81
[R].MNAEFIMLNHFSQR.[Y]	1xOxidation [M]	1xOxidation [M1; M7]	0.000257598	9.16411e-05	1	3	3	Q9BQ52	Q9BQ52 [715-728]			Zinc phosphodiesterase ELAC protein 2 OS=Homo sapiens OX=9606 GN=ELAC2 PE=1 SV=2	Q9BQ52-4; Q9BQ52-3; Q9BQ52	0	1753.81		1.11424e+06	132560	693850		230275		546063		Not Found	High	Peak Found	High	Not Found	Peak Found	Not Found	High	High	3.781e-05	3.937e-05	3.96	60.62
[R].MNAEFIMLNHFSQR.[Y]	2xOxidation [M1; M7]	2xOxidation [M1; M7]	0.000103504	9.16411e-05	1	3	4	Q9BQ52	Q9BQ52 [715-728]			Zinc phosphodiesterase ELAC protein 2 OS=Homo sapiens OX=9606 GN=ELAC2 PE=1 SV=2	Q9BQ52-4; Q9BQ52-3; Q9BQ52	0	1769.81		989454		1.22127e+06		830222		515004		Not Found	High	Not Found	High	Not Found	High	Not Found	High	High	3.781e-05	1.355e-05	4.37	54.59
[K].MNAQGNLDLR.[D]			0.000543074	9.16411e-05	1	4	3	O95425-2	O95425-2 [597-606]			Isoform 2 of Supervillin OS=Homo sapiens OX=9606 GN=SVIL	O95425-2; O95425; O95425-3; O95425-4	0	1131.56	440590	173698	194623		103766					High	Peak Found	High	Not Found	Peak Found	Not Found	High	Not Found	High	3.781e-05	9.442e-05	2.26	43.83
[K].MNIANTVISQENSSLQSMGTDQLLDLFTLDKDGK.[A]	2xOxidation [M1; M18]	2xOxidation [M1; M18]	1.90065e-05	9.16411e-05	1	2	1	O14981	O14981 [1772-1805]			TATA-binding protein-associated factor 172 OS=Homo sapiens OX=9606 GN=BTAF1 PE=1 SV=2	O14981-2; O14981	1	3758.81	242990		193143							High	Not Found	Peak Found	Not Found	Not Found	Not Found	Not Found	Not Found	High	3.781e-05	1.864e-06	4.42	86.09
[R].MNLASSFVNGFVNAAFGQDK.[L]	1xDeamidated [N9]; 1xOxidation [M1]	1xDeamidated [N9]; 1xOxidation [M1]	7.02498e-08	9.16411e-05	1	3	2	Q13200	Q13200 [370-389]			26S proteasome non-ATPase regulatory subunit 2 OS=Homo sapiens OX=9606 GN=PSMD2 PE=1 SV=3	Q13200; Q13200-2; Q13200-3	0	2133.99									No Quan Values	Not Found	High	Not Found	High	Not Found	Not Found	Not Found	Not Found	High	3.781e-05	2.645e-09	4.68
[K].MNIQNISIVLSPTVQISNR.[V]	1xOxidation [M1]	1xOxidation [M1]	1.58086e-05	9.16411e-05	1	1	1	Q15311	Q15311 [337-355]			RalA-binding protein 1 OS=Homo sapiens OX=9606 GN=RALBP1 PE=1 SV=3	Q15311	0	2143.15								119414		Not Found	Not Found	Not Found	Not Found	Not Found	Not Found	Not Found	High	High	3.781e-05	1.497e-06	2.95	74.75
[K].MNNCLSQMEQFPVK.[V]	1xCarbamidomethyl [C4]; 2xOxidation [M1; M8]	1xCarbamidomethyl [C4]; 2xOxidation [M1; M8]	0.000155224	9.16411e-05	2	4	2	Q14669-2; Q14669	Q14669-2 [1255-1268]; Q14669 [1222-1235]			Isoform 2 of E3 ubiquitin-protein ligase TRIP12 OS=Homo sapiens OX=9606 GN=TRIP12 E3 ubiquitin-protein ligase TRIP12 OS=Homo sapiens OX=9606 GN=TRIP12 PE=1 SV=1	Q14669-2; Q14669-4; Q14669; Q14669-3	0	1757.77	110677		176856		64106				Shared	High	Not Found	High	Not Found	Peak Found	Not Found	Not Found	Not Found	High	3.781e-05	2.179e-05	2.87	49.56
[-].MPLAQLADPWQK.[M]	1xMet-loss [N-Term]	1xMet-loss [N-Term]	0.000543074	9.16411e-05	1	1	1	P51812	P51812 [1-12]	P51812 1xMet-loss [N-Term]	P51812 1xMet-loss [N-Term]	Ribosomal protein S6 kinase alpha-3 OS=Homo sapiens OX=9606 GN=RPS6KA3 PE=1 SV=1	P51812	0	1266.68									No Quan Values	Not Found	Not Found	Not Found	Not Found	Not Found	High	Not Found	Not Found	High	3.781e-05	9.408e-05	3.18
[K].MMLTHLVVRPGLGSK.[ATS]	2xOxidation [M1; M2]	2xOxidation [M1; M2]	0.000495309	9.16411e-05	1	6	1	Q14839	Q14839 [1192-1206]			Chromodomain-helicase-DNA-binding protein 4 OS=Homo sapiens OX=9606 GN=CHD4 PE=1 SV=2	Q12873-3; Q14839-2; Q12873; Q12873-2; Q14839; Q8TDI0	0	1670.91	106774		390122		159014		49944.1			High	Not Found	Peak Found	Not Found	Peak Found	Not Found	Peak Found	Not Found	High	3.781e-05	8.472e-05	1.92	43.06
[R].MLFESLHHGLDDIQTLIK.[T]			4.51789e-05	9.16411e-05	1	1	2	Q7Z2T5	Q7Z2T5 [544-561]			TRMT1-like protein OS=Homo sapiens OX=9606 GN=TRMT1L PE=1 SV=2	Q7Z2T5	0	2110.1		574513		292795		123757		158874		Not Found	High	Not Found	High	Not Found	Peak Found	Not Found	Peak Found	High	3.781e-05	5.123e-06	3.73	76.11
[K].MITGDSQETAVAIASR.[L]			0.00029036	9.16411e-05	1	9	1	P98194	P98194 [568-583]			Calcium-transporting ATPase type 2C member 1 OS=Homo sapiens OX=9606 GN=ATP2C1 PE=1 SV=3	P98194-8; P98194; P98194-5; P98194-6; P98194-2; P98194-4; P98194-3; P98194-7; P98194-9	0	1649.82									No Quan Values	Not Found	Not Found	Not Found	Not Found	Not Found	Not Found	Not Found	High	High	3.781e-05	4.527e-05	2.25
[K].MLTEAIMHDCVVK.[L]	1xCarbamidomethyl [C10]; 2xOxidation [M1; M7]	1xCarbamidomethyl [C10]; 2xOxidation [M1; M7]	2.85048e-05	9.16411e-05	3	11	8	O43432; Q04637-8; Q04637-4	O43432 [904-916]; Q04637-8 [911-923]; Q04637-4 [823-835]			Eukaryotic translation initiation factor 4 gamma 3 OS=Homo sapiens OX=9606 GN=EIF4G3 PE=1 SV=2 Isoform 8 of Eukaryotic translation initiation factor 4 gamma 1 OS=Homo sapiens OX=9606 GN=EIF4G1 Isoform C of Eukaryotic translation initiation factor 4 gamma 1 OS=Homo sapiens OX=9606 GN=EIF4G1	Q04637-6; O43432; Q04637-9; O43432-3; Q04637; Q04637-3; Q04637-8; Q04637-4; Q04637-5; Q04637-7; O43432-4	0	1578.73	2079995		3.04921e+06		1452731		478216		Shared	High	Not Found	High	Not Found	High	Not Found	High	Not Found	High	3.781e-05	2.975e-06	4.24	43.13
[K].MLGEDGQVIGPSQESAGEVGALDK.[S]			9.61513e-05	9.16411e-05	1	2	1	Q14999	Q14999 [81-104]			Cullin-7 OS=Homo sapiens OX=9606 GN=CUL7 PE=1 SV=2	Q14999; Q14999-2	0	2387.14									No Quan Values	High	Not Found	Not Found	Not Found	Not Found	Not Found	Not Found	Not Found	High	3.781e-05	1.243e-05	2.61
[K].MLGEDGQVIGPSQESAGEVGALDK.[S]	1xOxidation [M1]	1xOxidation [M1]	2.37033e-06	9.16411e-05	1	2	1	Q14999	Q14999 [81-104]			Cullin-7 OS=Homo sapiens OX=9606 GN=CUL7 PE=1 SV=2	Q14999; Q14999-2	0	2403.13									No Quan Values	Not Found	Not Found	High	Not Found	Not Found	Not Found	Not Found	Not Found	High	3.781e-05	1.628e-07	4.68
[R].MIHMSMQMGNEPPISLR.[R]	2xOxidation [M6; M8]	2xOxidation [M6; M8]	3.75413e-09	9.16411e-05	1	1	2	Q92621	Q92621 [420-436]			Nuclear pore complex protein Nup205 OS=Homo sapiens OX=9606 GN=NUP205 PE=1 SV=3	Q92621	0	2003.92	768616		283746		179273					High	Not Found	Peak Found	Not Found	Peak Found	Not Found	Not Found	Not Found	High	3.781e-05	8.478e-11	4.2	52.61
[R].MIHMSMQMGNEPPISLR.[R]	3xOxidation [M4; M6; M8]	3xOxidation [M4; M6; M8]	1.44105e-07	9.16411e-05	1	1	7	Q92621	Q92621 [420-436]			Nuclear pore complex protein Nup205 OS=Homo sapiens OX=9606 GN=NUP205 PE=1 SV=3	Q92621	0	2019.91	1.65597e+06		1.29031e+06		429603					High	Not Found	High	Not Found	High	Not Found	Not Found	Not Found	High	3.781e-05	6.087e-09	2.81	45.33
[R].MLLIIATTHADIMHLTDSVVR.[R]	1xOxidation [M1]	1xOxidation [M1]	0.00017822	9.16411e-05	1	2	1	Q5SRE5	Q5SRE5 [1109-1129]			Nucleoporin NUP188 homolog OS=Homo sapiens OX=9606 GN=NUP188 PE=1 SV=1	Q5SRE5; Q5SRE5-2	0	2366.26	29474.4		159664							Peak Found	Not Found	High	Not Found	Not Found	Not Found	Not Found	Not Found	High	3.781e-05	2.545e-05	3.34	75.46
[K].MILIQDGSQNTNVDKPLR.[I]	1xDeamidated [Q5]	1xDeamidated [Q5; N12]	3.68917e-05	9.16411e-05	1	1	1	Q92945	Q92945 [267-284]			Far upstream element-binding protein 2 OS=Homo sapiens OX=9606 GN=KHSRP PE=1 SV=4	Q92945	0	2043.05									No Quan Values	Not Found	Not Found	Not Found	Not Found	Not Found	Not Found	Not Found	High	High	3.781e-05	4.053e-06	4.53
[K].MILIQDGSQNTNVDKPLR.[I]	1xOxidation [M1]	1xOxidation [M1]	1.2667e-07	9.16411e-05	1	1	6	Q92945	Q92945 [267-284]			Far upstream element-binding protein 2 OS=Homo sapiens OX=9606 GN=KHSRP PE=1 SV=4	Q92945	0	2058.06		2.30734e+06		967045		961942		1.01715e+06		Not Found	High	Not Found	High	Not Found	High	Not Found	High	High	3.781e-05	5.25e-09	5.04	48.83
[R].MLLQSSEGR.[C]	1xOxidation [M1]	1xOxidation [M1]	0.00052828	9.16411e-05	1	1	3	O75643	O75643 [1367-1375]			U5 small nuclear ribonucleoprotein 200 kDa helicase OS=Homo sapiens OX=9606 GN=SNRNP200 PE=1 SV=2	O75643	0	1036.51	568136		803678		122432					High	Not Found	High	Not Found	High	Not Found	Not Found	Not Found	High	3.781e-05	9.099e-05	2.34	34.66
[K].MLPSVPATAVR.[V]			0.000135194	9.16411e-05	1	4	5	Q5VZL5	Q5VZL5 [328-338]			Zinc finger MYM-type protein 4 OS=Homo sapiens OX=9606 GN=ZMYM4 PE=1 SV=1	Q5VZL5; Q5VZL5-4; Q5VZL5-2; Q5VZL5-3	0	1141.64	797684		973876		411404		195002			High	Not Found	High	Not Found	High	Not Found	High	Not Found	High	3.781e-05	1.849e-05	1.98	53.64
[R].MLTEDWELFK.[Q]	1xOxidation [M1]	1xOxidation [M1]	7.92413e-05	9.16411e-05	1	6	1	P78312-5	P78312-5 [179-188]			Isoform 5 of Protein FAM193A OS=Homo sapiens OX=9606 GN=FAM193A	P78312-6; P78312-5; P78312; P78312-3; P78312-2; P78312-4	0	1327.62	143706		365706		135942		93601.5			Peak Found	Not Found	High	Not Found	Peak Found	Not Found	Peak Found	Not Found	High	3.781e-05	9.889e-06	2.64	72.46
[R].MLQDTVLAAGCK.[Q]	1xCarbamidomethyl [C11]; 1xOxidation [M1]	1xCarbamidomethyl [C11]; 1xOxidation [M1]	2.10332e-05	9.16411e-05	1	5	1	Q9NVU0	Q9NVU0 [606-617]			DNA-directed RNA polymerase III subunit RPC5 OS=Homo sapiens OX=9606 GN=POLR3E PE=1 SV=1	Q9NVU0-4; Q9NVU0; Q9NVU0-5; Q9NVU0-2; Q9NVU0-3	0	1322.64		912666				338243		258808		Not Found	Peak Found	Not Found	Not Found	Not Found	Peak Found	Not Found	High	High	3.781e-05	2.08e-06	2.51	49.44
[K].MLQGLANGPQCAHYCFSLLK.[V]	2xCarbamidomethyl [C11; C15]; 1xDeamidated [N7]; 1xOxidation [M1]	2xCarbamidomethyl [C11; C15]; 1xDeamidated [N7]; 1xOxidation [M1]	6.17938e-05	9.16411e-05	1	1	1	Q92621	Q92621 [516-535]			Nuclear pore complex protein Nup205 OS=Homo sapiens OX=9606 GN=NUP205 PE=1 SV=3	Q92621	0	2325.08	392161	1.54571e+06			233103	1.26162e+06	205219	922538		High	Peak Found	Not Found	Not Found	Peak Found	Peak Found	Peak Found	Peak Found	High	3.781e-05	7.401e-06	4.35	66.91
[R].MLQPSSSPLWGK.[L]			0.000393467	9.16411e-05	1	1	3	Q9Y3T9	Q9Y3T9 [234-245]			Nucleolar complex protein 2 homolog OS=Homo sapiens OX=9606 GN=NOC2L PE=1 SV=4	Q9Y3T9	0	1330.68		1.79901e+06		1.4307e+06		307225		888504		Not Found	High	Not Found	High	Not Found	Peak Found	Not Found	High	High	3.781e-05	6.475e-05	2.49	60.02
[R].MLQPSSSPLWGK.[L]	1xOxidation [M1]	1xOxidation [M1]	0.000224362	9.16411e-05	1	1	6	Q9Y3T9	Q9Y3T9 [234-245]			Nucleolar complex protein 2 homolog OS=Homo sapiens OX=9606 GN=NOC2L PE=1 SV=4	Q9Y3T9	0	1346.68		7512466		5.46797e+06		2.1366e+06		2.39042e+06		Not Found	High	Not Found	High	Not Found	High	Not Found	High	High	3.781e-05	3.353e-05	2.71	55.23
[K].MLSELAVILK.[A]	1xOxidation [M1]	1xOxidation [M1]	0.000140268	9.16411e-05	1	3	1	Q99728	Q99728 [584-593]			BRCA1-associated RING domain protein 1 OS=Homo sapiens OX=9606 GN=BARD1 PE=1 SV=2	Q99728-3; Q99728-2; Q99728	0	1132.66									No Quan Values	Not Found	Not Found	Not Found	Not Found	Not Found	Not Found	Not Found	High	High	3.781e-05	1.92e-05	2.27
[R].MISKPADSQDVHELVLSK.[E]			6.06529e-06	9.16411e-05	1	2	2	A6NHR9	A6NHR9 [252-269]			Structural maintenance of chromosomes flexible hinge domain-containing protein 1 OS=Homo sapiens OX=9606 GN=SMCHD1 PE=1 SV=2	A6NHR9-2; A6NHR9	0	1997.04			270117		975730		70358.2			Not Found	Not Found	Peak Found	Not Found	High	Not Found	Peak Found	Not Found	High	3.781e-05	4.88e-07	3.57	48.27
[R].MISKPADSQDVHELVLSK.[E]	1xOxidation [M1]	1xOxidation [M1]	1.10323e-07	9.16411e-05	1	2	3	A6NHR9	A6NHR9 [252-269]			Structural maintenance of chromosomes flexible hinge domain-containing protein 1 OS=Homo sapiens OX=9606 GN=SMCHD1 PE=1 SV=2	A6NHR9-2; A6NHR9	0	2013.03			168445		1.38189e+06		209253			Not Found	Not Found	Peak Found	Not Found	High	Not Found	High	Not Found	High	3.781e-05	4.485e-09	5.17	45.27
[R].MLSQDAPTVK.[E]	1xOxidation [M1]	1xOxidation [M1]	0.000533167	9.16411e-05	1	1	3	O60934	O60934 [395-404]			Nibrin OS=Homo sapiens OX=9606 GN=NBN PE=1 SV=1	O60934	0	1105.56		1454381	39351.9	1.23935e+06		769141		545748		Not Found	Peak Found	Peak Found	High	Not Found	High	Not Found	High	High	3.781e-05	9.255e-05	2.54	35.98
[K].MLTEAIMHDCVVK.[L]	1xCarbamidomethyl [C10]	1xCarbamidomethyl [C10]	4.31453e-05	9.16411e-05	3	11	2	O43432; Q04637-8; Q04637-4	O43432 [904-916]; Q04637-8 [911-923]; Q04637-4 [823-835]			Eukaryotic translation initiation factor 4 gamma 3 OS=Homo sapiens OX=9606 GN=EIF4G3 PE=1 SV=2 Isoform 8 of Eukaryotic translation initiation factor 4 gamma 1 OS=Homo sapiens OX=9606 GN=EIF4G1 Isoform C of Eukaryotic translation initiation factor 4 gamma 1 OS=Homo sapiens OX=9606 GN=EIF4G1	Q04637-6; O43432; Q04637-9; O43432-3; Q04637; Q04637-3; Q04637-8; Q04637-4; Q04637-5; Q04637-7; O43432-4	0	1546.74	956367	7682320	1.49077e+06	5295787	683877	3.00828e+06	409478	4.314e+06	Shared	Peak Found	Peak Found	High	Peak Found	High	Peak Found	Peak Found	Peak Found	High	3.781e-05	4.841e-06	2.17	54.54
[K].MLTEAIMHDCVVK.[L]	1xCarbamidomethyl [C10]; 1xOxidation [M]	1xCarbamidomethyl [C10]; 1xOxidation [M1; M7]	3.86305e-05	9.16411e-05	3	11	7	O43432; Q04637-8; Q04637-4	O43432 [904-916]; Q04637-8 [911-923]; Q04637-4 [823-835]			Eukaryotic translation initiation factor 4 gamma 3 OS=Homo sapiens OX=9606 GN=EIF4G3 PE=1 SV=2 Isoform 8 of Eukaryotic translation initiation factor 4 gamma 1 OS=Homo sapiens OX=9606 GN=EIF4G1 Isoform C of Eukaryotic translation initiation factor 4 gamma 1 OS=Homo sapiens OX=9606 GN=EIF4G1	Q04637-6; O43432; Q04637-9; O43432-3; Q04637; Q04637-3; Q04637-8; Q04637-4; Q04637-5; Q04637-7; O43432-4	0	1562.74	1.06373e+06		1.48832e+06		669464		94251		Shared	High	Not Found	High	Not Found	High	Not Found	Peak Found	Not Found	High	3.781e-05	4.258e-06	4.59	47.49
[K].MLQGLANGPQCAHYCFSLLK.[V]	2xCarbamidomethyl [C11; C15]; 1xOxidation [M1]	2xCarbamidomethyl [C11; C15]; 1xOxidation [M1]	2.28458e-06	9.16411e-05	1	1	2	Q92621	Q92621 [516-535]			Nuclear pore complex protein Nup205 OS=Homo sapiens OX=9606 GN=NUP205 PE=1 SV=3	Q92621	0	2324.1	1.09127e+06	712866	2.52613e+06	563860		669217		205693		High	Peak Found	High	Peak Found	Not Found	Peak Found	Not Found	Peak Found	High	3.781e-05	1.561e-07	4.7	64.43
[R].MVSMPQTTAGTILDGVNVGR.[G]	2xOxidation [M1; M4]	2xOxidation [M1; M4]	1.37685e-05	9.16411e-05	1	4	1	O95425-2	O95425-2 [1289-1308]			Isoform 2 of Supervillin OS=Homo sapiens OX=9606 GN=SVIL	O95425-2; O95425; O95425-3; O95425-4	0	2079.02									No Quan Values	High	Not Found	Not Found	Not Found	Not Found	Not Found	Not Found	Not Found	High	3.781e-05	1.271e-06	3.22
[K].MVVPGLDGAQIPR.[D]			3.82763e-05	9.16411e-05	1	1	4	P49327	P49327 [1159-1171]			Fatty acid synthase OS=Homo sapiens OX=9606 GN=FASN PE=1 SV=3	P49327	0	1352.74	956578		1.54714e+06		1.02895e+06					High	Not Found	High	Not Found	High	Not Found	High	Not Found	High	3.781e-05	4.21e-06	3.08	67.04
[K].MVVPGLDGAQIPR.[D]	1xOxidation [M1]	1xOxidation [M1]	2.12279e-05	9.16411e-05	1	1	5	P49327	P49327 [1159-1171]			Fatty acid synthase OS=Homo sapiens OX=9606 GN=FASN PE=1 SV=3	P49327	0	1368.73	1.34901e+06		2735781		1.71293e+06		400323			High	Not Found	High	Not Found	High	Not Found	High	Not Found	High	3.781e-05	2.103e-06	3.03	60.58
[K].NGEILLSPALSYTTK.[H]			2.95678e-06	9.16411e-05	1	8	6	Q86U86	Q86U86 [882-896]			Protein polybromo-1 OS=Homo sapiens OX=9606 GN=PBRM1 PE=1 SV=1	Q86U86-5; Q86U86-7; Q86U86-4; Q86U86; Q86U86-9; Q86U86-8; Q86U86-2; Q86U86-3	0	1606.87	417348		640208				269142			High	Not Found	High	Not Found	High	Not Found	High	Not Found	High	3.781e-05	2.102e-07	4.18	69.54
[K].NGEILLSPALSYTTK.[H]	1xDeamidated [N1]	1xDeamidated [N1]	6.29293e-06	9.16411e-05	1	8	9	Q86U86	Q86U86 [882-896]			Protein polybromo-1 OS=Homo sapiens OX=9606 GN=PBRM1 PE=1 SV=1	Q86U86-5; Q86U86-7; Q86U86-4; Q86U86; Q86U86-9; Q86U86-8; Q86U86-2; Q86U86-3	0	1607.85	650362		925114		468850		597399			High	Not Found	High	Not Found	High	Not Found	High	Not Found	High	3.781e-05	5.101e-07	4.42	81.43
[K].NGFRPLDVSLYAQQR.[Y]	1xDeamidated [N1]	1xDeamidated [N1]	9.52697e-05	9.16411e-05	1	1	5	Q92615	Q92615 [322-336]			La-related protein 4B OS=Homo sapiens OX=9606 GN=LARP4B PE=1 SV=3	Q92615	0	1764.9		1.53067e+06		1133710		510241		444022		Not Found	High	Not Found	High	Not Found	High	Not Found	High	High	3.781e-05	1.224e-05	3.82	69.83
[R].NGFSLVNQIYYYHNVK.[C]	1xDeamidated [N1]	1xDeamidated [N1]	1.31488e-05	9.16411e-05	1	3	5	Q8IWV8-4	Q8IWV8-4 [670-685]			Isoform 4 of E3 ubiquitin-protein ligase UBR2 OS=Homo sapiens OX=9606 GN=UBR2	Q8IWV8-3; Q8IWV8; Q8IWV8-4	0	1959.96	131557		346238		101072		167087			High	Not Found	High	Not Found	High	Not Found	High	Not Found	High	3.781e-05	1.207e-06	3.45	75.91
[K].NGHYIIPQMADSLDLSELAK.[A]	1xDeamidated [N1]; 1xOxidation [M9]	1xDeamidated [N1]; 1xOxidation [M9]	1.95296e-07	9.16411e-05	1	1	3	Q9Y2X7	Q9Y2X7 [243-262]			ARF GTPase-activating protein GIT1 OS=Homo sapiens OX=9606 GN=GIT1 PE=1 SV=2	Q9Y2X7	0	2232.09				256893		247066				Not Found	High	Not Found	High	Not Found	High	Not Found	Not Found	High	3.781e-05	8.692e-09	3.74	76.38
[R].NGIDILVGTPGR.[I]			0.000287698	9.16411e-05	2	3	4	Q9NR30; Q9BQ39	Q9NR30 [307-318]; Q9BQ39 [258-269]			Nucleolar RNA helicase 2 OS=Homo sapiens OX=9606 GN=DDX21 PE=1 SV=5 ATP-dependent RNA helicase DDX50 OS=Homo sapiens OX=9606 GN=DDX50 PE=1 SV=1	Q9NR30; Q9NR30-2; Q9BQ39	0	1211.67		3.2635e+06		7.14189e+06		2.16354e+06		1.4709e+06	Shared	Not Found	High	Not Found	High	Not Found	High	Not Found	High	High	3.781e-05	4.451e-05	3.89	64.46
[R].NGIDILVGTPGR.[I]	1xDeamidated [N1]	1xDeamidated [N1]	1.36423e-05	9.16411e-05	2	3	9	Q9NR30; Q9BQ39	Q9NR30 [307-318]; Q9BQ39 [258-269]			Nucleolar RNA helicase 2 OS=Homo sapiens OX=9606 GN=DDX21 PE=1 SV=5 ATP-dependent RNA helicase DDX50 OS=Homo sapiens OX=9606 GN=DDX50 PE=1 SV=1	Q9NR30; Q9NR30-2; Q9BQ39	0	1212.66		6.23722e+06		1.30612e+07	47775.1	4.27697e+06	31737.1	2.85478e+06	Shared	Not Found	High	High	High	Peak Found	High	Peak Found	High	High	3.781e-05	1.257e-06	3.74	77.14
[K].NGLTPLHVAAHYDNQK.[V]	1xDeamidated [N1]	1xDeamidated [N1]	0.000318368	9.16411e-05	1	3	2	Q01484	Q01484 [595-610]			Ankyrin-2 OS=Homo sapiens OX=9606 GN=ANK2 PE=1 SV=4	Q01484; Q01484-2; Q01484-5	0	1778.88		1.28335e+06			218153		118641	267276		Not Found	Peak Found	Not Found	Not Found	High	Not Found	High	Peak Found	High	3.781e-05	5.016e-05	2.94	49.09
[R].NGPLEEDGERYDEDEEAAK.[D]			0.000103504	9.16411e-05	1	2	4	P13807	P13807 [665-683]			Glycogen [starch] synthase, muscle OS=Homo sapiens OX=9606 GN=GYS1 PE=1 SV=2	P13807; P13807-2	1	2165.91		2.83707e+06		996222		728963		790211		Not Found	High	Not Found	High	Not Found	High	Not Found	High	High	3.781e-05	1.355e-05	3.11	43.92
[R].NGDYLDVGIGQVSVK.[Y]	1xDeamidated [N1]	1xDeamidated [N1]	0.000138982	9.16411e-05	1	2	3	O94830	O94830 [477-491]			Phospholipase DDHD2 OS=Homo sapiens OX=9606 GN=DDHD2 PE=1 SV=2	O94830-2; O94830	0	1564.79		224905		148424		118143		171317		Not Found	High	Not Found	Peak Found	Not Found	Peak Found	Not Found	High	High	3.781e-05	1.913e-05	2.89	78.28
[R].NGPLPIPSEGSGFTK.[L]			3.52144e-07	9.16411e-05	1	1	7	Q5VYK3	Q5VYK3 [823-837]			Proteasome adapter and scaffold protein ECM29 OS=Homo sapiens OX=9606 GN=ECPAS PE=1 SV=2	Q5VYK3	0	1500.77	4439420		5088523		3.10515e+06		2.36654e+06			High	Not Found	High	Not Found	High	Not Found	High	Not Found	High	3.781e-05	1.738e-08	3.62	61.43
[K].NGQDLGVAFK.[I]	1xDeamidated [N1]	1xDeamidated [N1; Q3]	0.000671138	9.16411e-05	1	2	7	Q00839	Q00839 [424-433]			Heterogeneous nuclear ribonucleoprotein U OS=Homo sapiens OX=9606 GN=HNRNPU PE=1 SV=6	Q00839-2; Q00839	0	1049.53	111340	913069	608008	1.98508e+06	365361	1.84718e+06	168338	902863		Peak Found	High	High	High	High	High	High	High	High	3.781e-05	0.000121	2.97	61.68
[K].NGQHFIIPQMADSSLDLSELAK.[A]	1xDeamidated [Q3]; 1xOxidation [M10]	1xDeamidated [Q3]; 1xOxidation [M10]	9.01476e-05	9.16411e-05	1	10	3	Q14161	Q14161 [243-264]			ARF GTPase-activating protein GIT2 OS=Homo sapiens OX=9606 GN=GIT2 PE=1 SV=2	Q14161-11; Q14161-4; Q14161-5; Q14161-7; Q14161-8; Q14161-9; Q14161-6; Q14161; Q14161-3; Q14161-2	0	2431.18		213567						164202		Not Found	High	Not Found	High	Not Found	Not Found	Not Found	High	High	3.781e-05	1.143e-05	3.12	78.36
[R].NGSFGVLVATNVAAR.[G]	1xDeamidated [N1]	1xDeamidated [N1]	2.67186e-06	9.16411e-05	1	2	13	Q9NR30	Q9NR30 [485-499]			Nucleolar RNA helicase 2 OS=Homo sapiens OX=9606 GN=DDX21 PE=1 SV=5	Q9NR30; Q9NR30-2	0	1476.78		1.9921e+06		5.35689e+06		1.56669e+06		1.28105e+06		Not Found	High	Not Found	High	Not Found	High	Not Found	High	High	3.781e-05	1.856e-07	3.77	76.69
[K].NGTKPPLDADVNLEAIAGDLR.[C]	1xDeamidated [N]	1xDeamidated [N1; N12]	5.43177e-05	9.16411e-05	1	5	2	O15381	O15381 [764-784]			Nuclear valosin-containing protein-like OS=Homo sapiens OX=9606 GN=NVL PE=1 SV=1	O15381-3; O15381; O15381-5; O15381-4; O15381-2	0	2180.12		199867		148731		50022.4		78643.5		Not Found	Peak Found	Not Found	High	Not Found	Peak Found	Not Found	High	High	3.781e-05	6.337e-06	2.72	80.8
[R].NGVIFQEGGEK.[H]			0.000118839	9.16411e-05	1	1	4	Q8NI27	Q8NI27 [751-761]			THO complex subunit 2 OS=Homo sapiens OX=9606 GN=THOC2 PE=1 SV=2	Q8NI27	0	1177.58	668776		1.91016e+06		724717		458422			High	Not Found	High	Not Found	High	Not Found	High	Not Found	High	3.781e-05	1.595e-05	2.89	44.36
[R].NGVIFQEGGEK.[H]	1xDeamidated [N/Q]	1xDeamidated [N1; Q6]	0.000142876	9.16411e-05	1	1	13	Q8NI27	Q8NI27 [751-761]			THO complex subunit 2 OS=Homo sapiens OX=9606 GN=THOC2 PE=1 SV=2	Q8NI27	0	1178.57	2.93967e+06	1.91101e+06	5.12419e+06		2.13739e+06	751221	1.3487e+06	805930		High	Peak Found	High	Not Found	High	Peak Found	High	Peak Found	High	3.781e-05	1.978e-05	3.2	55.91
[R].NHAVLTANFSVTNLSQTDEIPVLTLK.[D]			7.22685e-05	9.16411e-05	1	1	2	O60934	O60934 [44-69]			Nibrin OS=Homo sapiens OX=9606 GN=NBN PE=1 SV=1	O60934	0	2825.5		457509		329050						Not Found	High	Not Found	High	Not Found	Not Found	Not Found	Not Found	High	3.781e-05	8.868e-06	5.49	79.36
[K].NHDEESLECLCR.[L]	2xCarbamidomethyl [C9; C11]	2xCarbamidomethyl [C9; C11]	3.7233e-05	9.16411e-05	3	11	6	O43432; Q04637-8; Q04637-4	O43432 [920-931]; Q04637-8 [927-938]; Q04637-4 [839-850]			Eukaryotic translation initiation factor 4 gamma 3 OS=Homo sapiens OX=9606 GN=EIF4G3 PE=1 SV=2 Isoform 8 of Eukaryotic translation initiation factor 4 gamma 1 OS=Homo sapiens OX=9606 GN=EIF4G1 Isoform C of Eukaryotic translation initiation factor 4 gamma 1 OS=Homo sapiens OX=9606 GN=EIF4G1	Q04637-6; O43432; Q04637-9; O43432-3; Q04637; Q04637-3; Q04637-8; Q04637-4; Q04637-5; Q04637-7; O43432-4	0	1561.64	684150		1.26593e+06		659626		228786		Shared	High	Not Found	High	Not Found	High	Not Found	High	Not Found	High	3.781e-05	4.074e-06	2.75	43.17
[R].NHGVVALGDTVEEAFYK.[I]			2.00865e-05	9.16411e-05	1	6	1	P35612	P35612 [289-305]			Beta-adducin OS=Homo sapiens OX=9606 GN=ADD2 PE=1 SV=3	P35612-3; P35612-2; P35612-4; P35612-9; P35612-8; P35612	0	1848.91				217867				338653		Not Found	Not Found	Not Found	Peak Found	Not Found	Not Found	Not Found	High	High	3.781e-05	1.986e-06	3.73	64.7
[R].NGPLPIPSEGSGFTK.[L]	1xDeamidated [N1]	1xDeamidated [N1]	2.72154e-06	9.16411e-05	1	1	8	Q5VYK3	Q5VYK3 [823-837]			Proteasome adapter and scaffold protein ECM29 OS=Homo sapiens OX=9606 GN=ECPAS PE=1 SV=2	Q5VYK3	0	1501.75	2.94175e+06		3.9543e+06		2.2296e+06	80585.4	1.35838e+06	147197		High	Not Found	High	Not Found	High	Peak Found	Peak Found	Peak Found	High	3.781e-05	1.905e-07	3.85	72.58
[K].NHKEEMSQLTGQNSGDVNVEINVAPGKDLTK.[T]			5.84301e-08	9.16411e-05	1	1	7	P35527	P35527 [291-321]			Keratin, type I cytoskeletal 9 OS=Homo sapiens OX=9606 GN=KRT9 PE=1 SV=3	P35527	2	3352.64	1.94361e+07	1.28376e+07	1.87947e+07	1.13712e+07	2.90512e+07	33168260	16631656	9633260		High	High	High	High	High	Peak Found	Peak Found	Peak Found	High	3.781e-05	2.127e-09	9.36	54.07
[K].NGDILLLNR.[Q]			0.000447602	9.16411e-05	1	1	3	O95602	O95602 [544-552]			DNA-directed RNA polymerase I subunit RPA1 OS=Homo sapiens OX=9606 GN=POLR1A PE=1 SV=2	O95602	0	1027.59	2180351		3.2114e+06		1456401		816650			High	Not Found	High	Not Found	High	Not Found	Peak Found	Not Found	High	3.781e-05	7.54e-05	3.14	59.5
[K].NGDGLPSAVAQR.[V]			3.39567e-05	9.16411e-05	1	2	1	Q5SRE5	Q5SRE5 [1506-1517]			Nucleoporin NUP188 homolog OS=Homo sapiens OX=9606 GN=NUP188 PE=1 SV=1	Q5SRE5; Q5SRE5-2	0	1184.6	101819		1.33538e+06		225236		54663.1			Peak Found	Not Found	High	Not Found	Peak Found	Not Found	Peak Found	Not Found	High	3.781e-05	3.655e-06	3.59	43.36
[K].NETDEDGWTTVR.[R]			1.06384e-05	9.16411e-05	1	2	4	Q14152	Q14152 [1370-1381]			Eukaryotic translation initiation factor 3 subunit A OS=Homo sapiens OX=9606 GN=EIF3A PE=1 SV=1	Q14152; Q14152-2	0	1422.61			532400				508989			High	Not Found	High	Not Found	High	Not Found	High	Not Found	High	3.781e-05	9.433e-07	3.12	49.11
[K].NETYNSHPLLVK.[V]			3.7233e-05	9.16411e-05	1	1	9	Q8NI27	Q8NI27 [529-540]			THO complex subunit 2 OS=Homo sapiens OX=9606 GN=THOC2 PE=1 SV=2	Q8NI27	0	1414.73	3.12122e+06		6.12828e+06		2.52096e+06		1.69026e+06			High	Not Found	High	Not Found	High	Not Found	High	Not Found	High	3.781e-05	4.07e-06	3.78	40.35
[K].NEVDMQVLHLLGPK.[L]			1.27842e-07	9.16411e-05	1	2	7	P47897	P47897 [167-180]			Glutamine--tRNA ligase OS=Homo sapiens OX=9606 GN=QARS1 PE=1 SV=1	P47897-2; P47897	0	1592.85		7.77053e+06		3.15638e+06		721473		2.07212e+06		Not Found	High	Not Found	High	Not Found	High	Not Found	High	High	3.781e-05	5.294e-09	4.24	69.48
[K].NEVDMQVLHLLGPK.[L]	1xOxidation [M5]	1xOxidation [M5]	6.17806e-06	9.16411e-05	1	2	9	P47897	P47897 [167-180]			Glutamine--tRNA ligase OS=Homo sapiens OX=9606 GN=QARS1 PE=1 SV=1	P47897-2; P47897	0	1608.84		9.05052e+06		4.09742e+06		4.00272e+06		2.63579e+06		Not Found	High	Not Found	High	Not Found	High	Not Found	High	High	3.781e-05	4.954e-07	3.57	63.39
[R].NFDFEGSLSPVIAPK.[K]			5.28257e-06	9.16411e-05	1	1	6	Q9H1A4	Q9H1A4 [680-694]			Anaphase-promoting complex subunit 1 OS=Homo sapiens OX=9606 GN=ANAPC1 PE=1 SV=1	Q9H1A4	0	1620.83	1.82166e+06	73363	2.59881e+06		1.11241e+06	90463.2	1.2254e+06	65740.3		High	Peak Found	High	Not Found	High	Peak Found	High	Peak Found	High	3.781e-05	4.148e-07	3.4	75.8
[R].NFDFEGSLSPVIAPK.[K]	1xPhospho [S9(100)]	1xPhospho [S7(0); S9(100)]	7.99584e-06	9.16411e-05	1	1	4	Q9H1A4	Q9H1A4 [680-694]	Q9H1A4 1xPhospho [S686(0); S688(100)]	Q9H1A4 1xPhospho [S688(100)]	Anaphase-promoting complex subunit 1 OS=Homo sapiens OX=9606 GN=ANAPC1 PE=1 SV=1	Q9H1A4	0	1700.79	548146		915869		439555		234298			High	Not Found	High	Not Found	High	Not Found	High	Not Found	High	3.781e-05	6.706e-07	5.6	84.97
[K].NFGAENPDPFVPVLNTAVK.[L]			7.84988e-06	9.16411e-05	1	1	2	Q9H583	Q9H583 [1680-1698]			HEAT repeat-containing protein 1 OS=Homo sapiens OX=9606 GN=HEATR1 PE=1 SV=3	Q9H583	0	2029.04					1.0129e+06					Not Found	Not Found	Not Found	Not Found	High	Not Found	Not Found	Not Found	High	3.781e-05	6.614e-07	4.54	77.32
[K].NFGGTVSIIPVGEAK.[T]			1.18789e-06	9.16411e-05	1	1	5	Q15058	Q15058 [854-868]			Kinesin-like protein KIF14 OS=Homo sapiens OX=9606 GN=KIF14 PE=1 SV=1	Q15058	0	1488.81	384366		812479		328098		364494			High	Not Found	High	Not Found	High	Not Found	High	Not Found	High	3.781e-05	7.227e-08	3.36	66.32
[R].NFILDQTNVSAAAQR.[R]			2.64606e-08	9.16411e-05	1	2	17	Q00839	Q00839 [576-590]			Heterogeneous nuclear ribonucleoprotein U OS=Homo sapiens OX=9606 GN=HNRNPU PE=1 SV=6	Q00839-2; Q00839	0	1647.84	213752	1.72341e+06	763366	3.21282e+06	416452	2.38838e+06	186061	737122		High	High	High	High	High	High	High	High	High	3.781e-05	8.353e-10	3.56	61.46
[K].NGDGLPSAVAQR.[V]	1xDeamidated [N1]	1xDeamidated [N1]	0.000138982	9.16411e-05	1	2	5	Q5SRE5	Q5SRE5 [1506-1517]			Nucleoporin NUP188 homolog OS=Homo sapiens OX=9606 GN=NUP188 PE=1 SV=1	Q5SRE5; Q5SRE5-2	0	1185.59	242854		4.911e+06		717483		189908	248568		High	Not Found	High	Not Found	High	Not Found	High	Peak Found	High	3.781e-05	1.904e-05	2.87	52.89
[K].NFINNPLAQADWAAK.[K]			2.26308e-07	9.16411e-05	1	1	3	P35579	P35579 [15-29]			Myosin-9 OS=Homo sapiens OX=9606 GN=MYH9 PE=1 SV=4	P35579	0	1672.84					396459					Not Found	Not Found	High	Not Found	High	Not Found	Not Found	Not Found	High	3.781e-05	1.031e-08	4.15	72.53
[K].NFPLENQGVCRPNGLK.[L]	1xCarbamidomethyl [C10]; 1xDeamidated [N13]	1xCarbamidomethyl [C10]; 1xDeamidated [N13]	5.90125e-05	9.16411e-05	1	3	2	Q9Y6Q2	Q9Y6Q2 [26-41]			Stonin-1 OS=Homo sapiens OX=9606 GN=STON1 PE=1 SV=2	Q9Y6Q2-3; Q9Y6Q2-2; Q9Y6Q2	0	1843.91		642818				347628		717812		Not Found	Peak Found	Not Found	Not Found	Not Found	High	Not Found	High	High	3.781e-05	7.004e-06	3.69	52.22
[R].NFQDPNAFAVEK.[Q]			0.00017822	9.16411e-05	1	1	1	Q14207	Q14207 [231-242]			Protein NPAT OS=Homo sapiens OX=9606 GN=NPAT PE=1 SV=3	Q14207	0	1379.66			231185							Not Found	Not Found	High	Not Found	Not Found	Not Found	Not Found	Not Found	High	3.781e-05	2.562e-05	2.55	55.01
[K].NFSEIHPGMLLIGFVK.[S]			1.05409e-05	9.16411e-05	1	1	2	Q14690	Q14690 [722-737]			Protein RRP5 homolog OS=Homo sapiens OX=9606 GN=PDCD11 PE=1 SV=3	Q14690	0	1801.97	177026		150028				95232			High	Not Found	High	Not Found	Not Found	Not Found	Peak Found	Not Found	High	3.781e-05	9.329e-07	3.38	78.83
[R].NFSNMDDEENYSAASK.[A]			2.8223e-08	9.16411e-05	1	2	1	O43264	O43264 [609-624]			Centromere/kinetochore protein zw10 homolog OS=Homo sapiens OX=9606 GN=ZW10 PE=1 SV=3	O43264-2; O43264	0	1821.72									No Quan Values	Not Found	Not Found	Not Found	Not Found	Not Found	Not Found	Not Found	High	High	3.781e-05	9.048e-10	2.94
[R].NFSNMDDEENYSAASK.[A]	1xOxidation [M5]	1xOxidation [M5]	1.09284e-08	9.16411e-05	1	2	6	O43264	O43264 [609-624]			Centromere/kinetochore protein zw10 homolog OS=Homo sapiens OX=9606 GN=ZW10 PE=1 SV=3	O43264-2; O43264	0	1837.72		1.10093e+06		1.0034e+06		562028		542564		Not Found	High	Not Found	High	Not Found	High	Not Found	High	High	3.781e-05	2.963e-10	3.51	41.12
[R].NFSNMDDEENYSAASK.[A]	1xDeamidated [N4]; 1xOxidation [M5]	1xDeamidated [N4]; 1xOxidation [M5]	9.61513e-05	9.16411e-05	1	2	1	O43264	O43264 [609-624]			Centromere/kinetochore protein zw10 homolog OS=Homo sapiens OX=9606 GN=ZW10 PE=1 SV=3	O43264-2; O43264	0	1838.7									No Quan Values	Not Found	Not Found	Not Found	Not Found	Not Found	High	Not Found	Not Found	High	3.781e-05	1.235e-05	4.09
[R].NFTATPALADVLPQTLQR.[N]			6.00967e-06	9.16411e-05	1	1	6	Q8IYR2	Q8IYR2 [172-189]			SET and MYND domain-containing protein 4 OS=Homo sapiens OX=9606 GN=SMYD4 PE=2 SV=3	Q8IYR2	0	1956.05		281542				155682		129098		Not Found	High	Not Found	High	Not Found	Peak Found	Not Found	High	High	3.781e-05	4.824e-07	3.86	78.63
[K].NFVELISHQQLSK.[G]			3.49001e-06	9.16411e-05	1	2	9	Q9NXF1	Q9NXF1 [185-197]			Testis-expressed protein 10 OS=Homo sapiens OX=9606 GN=TEX10 PE=1 SV=2	Q9NXF1-2; Q9NXF1	0	1542.83		6544533		4.68734e+06		1.36434e+06		1.34745e+06		Not Found	High	Not Found	High	Not Found	High	Not Found	High	High	3.781e-05	2.545e-07	4.05	59
[R].NGASALEISYNGEPQSWFQR.[Q]	1xDeamidated [N1]	1xDeamidated [N1]	2.26363e-06	9.16411e-05	2	3	3	P26358; P26358-2	P26358 [1379-1398]; P26358-2 [1395-1414]			DNA (cytosine-5)-methyltransferase 1 OS=Homo sapiens OX=9606 GN=DNMT1 PE=1 SV=2 Isoform 2 of DNA (cytosine-5)-methyltransferase 1 OS=Homo sapiens OX=9606 GN=DNMT1	P26358-3; P26358; P26358-2	0	2255.04	160712		254677		80124.6				Shared	High	Not Found	High	Not Found	Peak Found	Not Found	Not Found	Not Found	High	3.781e-05	1.531e-07	3.45	84.38
[K].NFLTSLVAGLSTER.[T]			1.52367e-05	9.16411e-05	1	3	3	O94822	O94822 [384-397]			E3 ubiquitin-protein ligase listerin OS=Homo sapiens OX=9606 GN=LTN1 PE=1 SV=6	O94822-3; O94822-2; O94822	0	1507.81		1.06539e+06	743408	2133235	260943	510195				Not Found	Peak Found	Peak Found	Peak Found	High	Peak Found	High	Not Found	High	3.781e-05	1.432e-06	3.19	88.13
[K].NESELEAHLCR.[M]	1xCarbamidomethyl [C10]	1xCarbamidomethyl [C10]	7.02989e-05	9.16411e-05	1	3	2	Q14008	Q14008 [1786-1796]			Cytoskeleton-associated protein 5 OS=Homo sapiens OX=9606 GN=CKAP5 PE=1 SV=3	Q14008-2; Q14008; Q14008-3	0	1357.62		722781	142048		636090	48597.4	27676.9			Not Found	Peak Found	Peak Found	Not Found	High	Peak Found	Peak Found	Not Found	High	3.781e-05	8.607e-06	2.38	40.87
[K].NHKEEMSQLTGQNSGDVNVEINVAPGKDLTK.[T]	1xDeamidated [N18]	1xDeamidated [N18]	0.00011454	9.16411e-05	1	1	3	P35527	P35527 [291-321]			Keratin, type I cytoskeletal 9 OS=Homo sapiens OX=9606 GN=KRT9 PE=1 SV=3	P35527	2	3353.63	93315.6	3.44252e+06	201819	777890	154040					Peak Found	High	Peak Found	High	Peak Found	Not Found	Not Found	Not Found	High	3.781e-05	1.527e-05	4.22	53.25
[R].NHLEALPPEIGGCVALSVLSLR.[D]	1xCarbamidomethyl [C13]	1xCarbamidomethyl [C13]	1.73042e-12	9.16411e-05	2	3	3	Q14160-3; Q14160	Q14160-3 [322-343]; Q14160 [322-343]			Isoform 3 of Protein scribble homolog OS=Homo sapiens OX=9606 GN=SCRIB Protein scribble homolog OS=Homo sapiens OX=9606 GN=SCRIB PE=1 SV=4	Q14160-2; Q14160-3; Q14160	0	2345.26	243324		273917				127947	36473.6	Shared	High	Not Found	High	Not Found	Not Found	Not Found	High	Peak Found	High	3.781e-05	1.051e-14	5.57	81.92
[K].NLDLAVLELMQSSVDNTK.[M]	1xDeamidated [N1]; 1xOxidation [M10]	1xDeamidated [N1]; 1xOxidation [M10]	2.37033e-06	9.16411e-05	1	2	1	P78527	P78527 [1574-1591]			DNA-dependent protein kinase catalytic subunit OS=Homo sapiens OX=9606 GN=PRKDC PE=1 SV=3	P78527-2; P78527	0	2007									No Quan Values	Not Found	Not Found	High	Not Found	Not Found	Not Found	Not Found	Not Found	High	3.781e-05	1.621e-07	3.79
[R].NLDLDSIIAEVK.[A]			4.15752e-06	9.16411e-05	4	7	31	P35908; P04259; P02538; P13647	P35908 [342-353]; P04259 [327-338]; P02538 [327-338]; P13647 [332-343]			Keratin, type II cytoskeletal 2 epidermal OS=Homo sapiens OX=9606 GN=KRT2 PE=1 SV=2 Keratin, type II cytoskeletal 6B OS=Homo sapiens OX=9606 GN=KRT6B PE=1 SV=5 Keratin, type II cytoskeletal 6A OS=Homo sapiens OX=9606 GN=KRT6A PE=1 SV=3 Keratin, type II cytoskeletal 5 OS=Homo sapiens OX=9606 GN=KRT5 PE=1 SV=3	Q5XKE5; P35908; P04259; P02538; O95678; P48668; P13647	0	1329.73	4.62164e+07	2.1471e+07	3.02174e+07	3.46509e+08	4.47744e+07	3.42245e+07	5.05723e+07	16364390	Shared	High	High	High	High	High	High	High	High	High	3.781e-05	3.121e-07	4.07	83.2
[R].NLDLDSIIAEVK.[A]	1xDeamidated [N1]	1xDeamidated [N1]	1.49586e-05	9.16411e-05	4	7	12	P35908; P04259; P02538; P13647	P35908 [342-353]; P04259 [327-338]; P02538 [327-338]; P13647 [332-343]			Keratin, type II cytoskeletal 2 epidermal OS=Homo sapiens OX=9606 GN=KRT2 PE=1 SV=2 Keratin, type II cytoskeletal 6B OS=Homo sapiens OX=9606 GN=KRT6B PE=1 SV=5 Keratin, type II cytoskeletal 6A OS=Homo sapiens OX=9606 GN=KRT6A PE=1 SV=3 Keratin, type II cytoskeletal 5 OS=Homo sapiens OX=9606 GN=KRT5 PE=1 SV=3	Q5XKE5; P35908; P04259; P02538; O95678; P48668; P13647	0	1330.71	1.66227e+06	3.14085e+06	1.26999e+06	5.81397e+06	3.96699e+06	4865834	4.61318e+06	1.07454e+06	Shared	High	High	High	High	High	High	High	High	High	3.781e-05	1.396e-06	2.94	88.82
[R].NLDIERPTYTNLNR.[L]			0.000199046	9.16411e-05	2	11	9	Q71U36; P68363	Q71U36 [216-229]; P68363 [216-229]			Tubulin alpha-1A chain OS=Homo sapiens OX=9606 GN=TUBA1A PE=1 SV=1 Tubulin alpha-1B chain OS=Homo sapiens OX=9606 GN=TUBA1B PE=1 SV=1	P0DPH8; Q6PEY2; P0DPH7-2; Q71U36; Q9NY65; P68366-2; P68363; Q71U36-2; Q9BQE3; Q9NY65-2; P68366	0	1718.88	991074	2.37742e+06	2.26458e+06	2.91593e+06	1.00203e+06	1100137	227798	796974	Shared	High	High	High	High	High	High	High	High	High	3.781e-05	2.911e-05	3.08	51.24
[R].NLEAPYIPDVSSPSDTSNFDVDDDVLR.[N]			1.98927e-07	9.16411e-05	1	1	4	Q9Y5S2	Q9Y5S2 [352-378]			Serine/threonine-protein kinase MRCK beta OS=Homo sapiens OX=9606 GN=CDC42BPB PE=1 SV=2	Q9Y5S2	0	2980.37	883408		1270106							High	Not Found	High	Not Found	High	Not Found	Not Found	Not Found	High	3.781e-05	8.927e-09	5.91	85.21
[R].NLEASAVIQGLVK.[D]			1.19917e-05	9.16411e-05	1	1	4	Q8IWA0	Q8IWA0 [320-332]			WD repeat-containing protein 75 OS=Homo sapiens OX=9606 GN=WDR75 PE=1 SV=1	Q8IWA0	0	1341.77				723365		423969		305016		Not Found	High	Not Found	High	Not Found	High	Not Found	High	High	3.781e-05	1.082e-06	3.41	70.33
[K].NLEAVETLGSTSTICSDK.[T]	1xCarbamidomethyl [C15]	1xCarbamidomethyl [C15]	1.7317e-09	9.16411e-05	1	9	9	P05023	P05023 [360-377]			Sodium/potassium-transporting ATPase subunit alpha-1 OS=Homo sapiens OX=9606 GN=ATP1A1 PE=1 SV=1	P13637-3; P13637-2; P05023-2; P50993; Q13733; P05023; P05023-4; P05023-3; P13637	0	1924.92		2.95341e+06	55152.4	3.63209e+06		1.70156e+06		1.15636e+06		Not Found	High	Peak Found	High	Not Found	High	Not Found	High	High	3.781e-05	3.43e-11	5.57	61.5
[K].NLEAVETLNQLNSK.[D]			1.35172e-05	9.16411e-05	1	1	2	Q8IWU2	Q8IWU2 [943-956]			Serine/threonine-protein kinase LMTK2 OS=Homo sapiens OX=9606 GN=LMTK2 PE=1 SV=2	Q8IWU2	0	1572.82	208912				81859.7					High	Not Found	High	Not Found	Peak Found	Not Found	Not Found	Not Found	High	3.781e-05	1.249e-06	3.58	61.37
[R].NIEELQQQNQR.[L]			4.23578e-05	9.16411e-05	1	2	3	P12270	P12270 [542-552]			Nucleoprotein TPR OS=Homo sapiens OX=9606 GN=TPR PE=1 SV=3	P12270-2; P12270	0	1399.69									No Quan Values	Not Found	Not Found	High	Not Found	High	Not Found	High	Not Found	High	3.781e-05	4.741e-06	2.95
[K].NLDLAVLELMQSSVDNTK.[M]	1xOxidation [M10]	1xOxidation [M10]	2.28512e-05	9.16411e-05	1	2	4	P78527	P78527 [1574-1591]			DNA-dependent protein kinase catalytic subunit OS=Homo sapiens OX=9606 GN=PRKDC PE=1 SV=3	P78527-2; P78527	0	2006.01	88610.8		207486		294754					High	Not Found	High	Not Found	High	Not Found	Not Found	Not Found	High	3.781e-05	2.292e-06	3.48	77.37
[R].NLEELYLVGSLSHDISR.[N]			3.30312e-05	9.16411e-05	1	1	1	Q8TDW0	Q8TDW0 [515-531]			Volume-regulated anion channel subunit LRRC8C OS=Homo sapiens OX=9606 GN=LRRC8C PE=1 SV=2	Q8TDW0	0	1945		210623		200135		125699				Not Found	Peak Found	Not Found	High	Not Found	Peak Found	Not Found	Not Found	High	3.781e-05	3.559e-06	2.99	75.39
[K].NIELFFSGSAKPIYDDDPSLEGGVNGK.[N]	1xDeamidated [N25]	1xDeamidated [N25]	2.55097e-07	9.16411e-05	2	3	8	P26358; P26358-2	P26358 [430-456]; P26358-2 [446-472]			DNA (cytosine-5)-methyltransferase 1 OS=Homo sapiens OX=9606 GN=DNMT1 PE=1 SV=2 Isoform 2 of DNA (cytosine-5)-methyltransferase 1 OS=Homo sapiens OX=9606 GN=DNMT1	P26358-3; P26358; P26358-2	0	2870.37	667175		933335	137670	324676	72718.1	284228	44956.8	Shared	High	Not Found	High	Peak Found	High	Peak Found	High	Peak Found	High	3.781e-05	1.188e-08	4.51	78.03
[K].NLELNDDTILNDIK.[L]			1.58086e-05	9.16411e-05	1	1	4	Q6P3X3	Q6P3X3 [314-327]			Tetratricopeptide repeat protein 27 OS=Homo sapiens OX=9606 GN=TTC27 PE=1 SV=1	Q6P3X3	0	1629.83	163327	3.35496e+06		2.0106e+06		1.2962e+06		932681		Peak Found	High	Not Found	High	Not Found	High	Not Found	High	High	3.781e-05	1.5e-06	4.19	74.16
[K].NLELNDDTILNDIK.[L]	1xDeamidated [N5]	1xDeamidated [N5]	0.000623491	9.16411e-05	1	1	1	Q6P3X3	Q6P3X3 [314-327]			Tetratricopeptide repeat protein 27 OS=Homo sapiens OX=9606 GN=TTC27 PE=1 SV=1	Q6P3X3	0	1630.82									No Quan Values	Not Found	High	Not Found	Not Found	Not Found	Not Found	Not Found	Not Found	High	3.781e-05	0.0001104	2.79
[R].NIEPTEYIDDLFK.[L]			0.000105428	9.16411e-05	2	6	7	Q9Y4G8; Q8TEU7	Q9Y4G8 [735-747]; Q8TEU7 [878-890]			Rap guanine nucleotide exchange factor 2 OS=Homo sapiens OX=9606 GN=RAPGEF2 PE=1 SV=1 Rap guanine nucleotide exchange factor 6 OS=Homo sapiens OX=9606 GN=RAPGEF6 PE=1 SV=2	Q8TEU7-5; Q8TEU7-2; Q8TEU7-3; Q9Y4G8; Q8TEU7; Q8TEU7-4	0	1596.78	594726		945100		406586		561492		Shared	High	Not Found	High	Not Found	High	Not Found	High	Not Found	High	3.781e-05	1.383e-05	3.25	84.19
[R].NIETIINTFHQYSVK.[L]			1.45509e-05	9.16411e-05	1	1	5	P06702	P06702 [11-25]			Protein S100-A9 OS=Homo sapiens OX=9606 GN=S100A9 PE=1 SV=1	P06702	0	1806.94	225714	507648	138947	765699		107345	208853	68102.1		High	High	Peak Found	High	Not Found	Peak Found	High	Peak Found	High	3.781e-05	1.359e-06	3.45	70.68
[R].NLEVSSCVGSGGSSEAR.[E]	1xCarbamidomethyl [C7]	1xCarbamidomethyl [C7]	1.18789e-06	9.16411e-05	1	2	1	Q9C0C2	Q9C0C2 [1169-1185]			182 kDa tankyrase-1-binding protein OS=Homo sapiens OX=9606 GN=TNKS1BP1 PE=1 SV=4	Q9C0C2-2; Q9C0C2	0	1695.76					137030					Not Found	Not Found	Not Found	Not Found	High	Not Found	Not Found	Not Found	High	3.781e-05	7.181e-08	2.97	42.91
[R].NIEVVELLLDK.[G]			0.000176586	9.16411e-05	1	4	4	Q9ULH0	Q9ULH0 [347-357]			Kinase D-interacting substrate of 220 kDa OS=Homo sapiens OX=9606 GN=KIDINS220 PE=1 SV=3	Q9ULH0-2; Q9ULH0-4; Q9ULH0-3; Q9ULH0	0	1284.74	434470		1.31352e+06		383676		454890			High	Not Found	High	Not Found	High	Not Found	High	Not Found	High	3.781e-05	2.517e-05	3.62	82.85
[K].NLFASFPTEESSINYTFK.[T]			7.42933e-05	9.16411e-05	1	1	1	P49792	P49792 [2595-2612]			E3 SUMO-protein ligase RanBP2 OS=Homo sapiens OX=9606 GN=RANBP2 PE=1 SV=2	P49792	0	2095			548492							Not Found	Not Found	High	Not Found	Not Found	Not Found	Not Found	Not Found	High	3.781e-05	9.132e-06	2.56	79.98
[K].NLGIPIITVLGDSK.[N]			8.37271e-06	9.16411e-05	1	3	4	Q14008	Q14008 [941-954]			Cytoskeleton-associated protein 5 OS=Homo sapiens OX=9606 GN=CKAP5 PE=1 SV=3	Q14008-2; Q14008; Q14008-3	0	1439.85	252146		561193		2.64826e+06		275870			High	Not Found	High	Not Found	High	Not Found	High	Not Found	High	3.781e-05	7.114e-07	3.44	83.26
[K].NIELFFSGSAKPIYDDDPSLEGGVNGK.[N]			0.000490769	9.16411e-05	2	3	1	P26358; P26358-2	P26358 [430-456]; P26358-2 [446-472]			DNA (cytosine-5)-methyltransferase 1 OS=Homo sapiens OX=9606 GN=DNMT1 PE=1 SV=2 Isoform 2 of DNA (cytosine-5)-methyltransferase 1 OS=Homo sapiens OX=9606 GN=DNMT1	P26358-3; P26358; P26358-2	0	2869.39			86266						Shared	Not Found	Not Found	High	Not Found	Not Found	Not Found	Not Found	Not Found	High	3.781e-05	8.394e-05	3.04	75.92
[K].NHKEEMSQLTGQNSGDVNVEINVAPGKDLTK.[T]	1xDeamidated [Q12]; 1xOxidation [M6]	1xDeamidated [Q12]; 1xOxidation [M6]	2.41497e-05	9.16411e-05	1	1	1	P35527	P35527 [291-321]			Keratin, type I cytoskeletal 9 OS=Homo sapiens OX=9606 GN=KRT9 PE=1 SV=3	P35527	2	3369.62									No Quan Values	Not Found	High	Not Found	Not Found	Not Found	Not Found	Not Found	Not Found	High	3.781e-05	2.449e-06	6.57
[K].NLDLAAPTAEEAQR.[W]			7.02843e-06	9.16411e-05	1	1	4	Q8N3E9	Q8N3E9 [149-162]			1-phosphatidylinositol 4,5-bisphosphate phosphodiesterase delta-3 OS=Homo sapiens OX=9606 GN=PLCD3 PE=1 SV=3	Q8N3E9	0	1498.75		1.07905e+06		662986		314991		354557		Not Found	High	Not Found	High	Not Found	High	Not Found	High	High	3.781e-05	5.779e-07	3.98	53.38
[K].NLDEQLSAPK.[K]			0.00049989	9.16411e-05	1	4	2	A5YKK6	A5YKK6 [1311-1320]			CCR4-NOT transcription complex subunit 1 OS=Homo sapiens OX=9606 GN=CNOT1 PE=1 SV=2	A5YKK6-2; A5YKK6; A5YKK6-4; A5YKK6-3	0	1114.57	277394		380307		1.75022e+06		226669			High	Not Found	High	Not Found	Peak Found	Not Found	Peak Found	Not Found	High	3.781e-05	8.513e-05	2.81	44.38
[K].NHLPQDSQDLVLGGDVPISSIQATIAK.[L]			7.91279e-11	9.16411e-05	1	1	4	Q9H3S7	Q9H3S7 [1478-1504]			Tyrosine-protein phosphatase non-receptor type 23 OS=Homo sapiens OX=9606 GN=PTPN23 PE=1 SV=1	Q9H3S7	0	2816.48	945506		1.08561e+06		627084		788832			High	Not Found	High	Not Found	High	Not Found	High	Not Found	High	3.781e-05	9.286e-13	6.4	74.59
[R].NHPQMIAVLVDK.[M]			1.59549e-05	9.16411e-05	1	1	8	Q09161	Q09161 [596-607]			Nuclear cap-binding protein subunit 1 OS=Homo sapiens OX=9606 GN=NCBP1 PE=1 SV=1	Q09161	0	1364.74		4514555	134220	1.60214e+06		1.01152e+06		1.39264e+06		Not Found	High	Peak Found	High	Not Found	High	Not Found	High	High	3.781e-05	1.507e-06	3.35	50.2
[R].NHPQMIAVLVDK.[M]	1xOxidation [M5]	1xOxidation [M5]	4.90838e-05	9.16411e-05	1	1	8	Q09161	Q09161 [596-607]			Nuclear cap-binding protein subunit 1 OS=Homo sapiens OX=9606 GN=NCBP1 PE=1 SV=1	Q09161	0	1380.73	92050.7	3.46496e+06		1.23979e+06		1.35861e+06		1.50923e+06		Peak Found	High	Not Found	High	Not Found	High	Not Found	High	High	3.781e-05	5.628e-06	3.07	42.72
[R].NHSNAQFIESYVCR.[M]	1xCarbamidomethyl [C13]	1xCarbamidomethyl [C13]	0.000330313	9.16411e-05	1	5	1	P41229	P41229 [315-328]			Lysine-specific demethylase 5C OS=Homo sapiens OX=9606 GN=KDM5C PE=1 SV=2	P41229-5; P41229-3; P41229; P41229-2; P41229-4	0	1724.78			264667							Not Found	Not Found	High	Not Found	Not Found	Not Found	Not Found	Not Found	High	3.781e-05	5.26e-05	2.9	51.63
[K].NKEQHLSENEPVDTNSDNNLFTDTDLK.[S]			0.000257598	9.16411e-05	1	1	3	O60934	O60934 [503-529]			Nibrin OS=Homo sapiens OX=9606 GN=NBN PE=1 SV=1	O60934	1	3117.42		487422						274845		Not Found	High	Not Found	High	Not Found	Not Found	Not Found	High	High	3.781e-05	3.928e-05	5.13	54.19
[R].NKESSLLVSELEDTTEK.[T]			2.85048e-05	9.16411e-05	1	1	1	Q15058	Q15058 [97-113]			Kinesin-like protein KIF14 OS=Homo sapiens OX=9606 GN=KIF14 PE=1 SV=1	Q15058	1	1921.96									No Quan Values	Not Found	Not Found	High	Not Found	Not Found	Not Found	Not Found	Not Found	High	3.781e-05	2.971e-06	3.82
[K].NKLNDLEDALQQAK.[E]			7.77409e-08	9.16411e-05	1	1	17	P04264	P04264 [442-455]			Keratin, type II cytoskeletal 1 OS=Homo sapiens OX=9606 GN=KRT1 PE=1 SV=6	P04264	1	1599.83	4.15668e+06	5.28075e+06	7.09218e+06	10610760	9411066	9686580	5.46236e+06	2.66157e+06		High	High	High	High	High	High	High	High	High	3.781e-05	2.968e-09	4.91	59.51
[K].NKLNDLEDALQQAK.[E]	1xDeamidated [N4]	1xDeamidated [N4]	2.10231e-07	9.16411e-05	1	1	10	P04264	P04264 [442-455]			Keratin, type II cytoskeletal 1 OS=Homo sapiens OX=9606 GN=KRT1 PE=1 SV=6	P04264	1	1600.82			175819		1.5117e+06	1.03108e+06	572318	463323		High	Not Found	High	Not Found	High	High	High	High	High	3.781e-05	9.452e-09	3.98	56.14
[K].NKLNDLEDALQQAKEDLAR.[L]			8.29392e-07	9.16411e-05	1	1	15	P04264	P04264 [442-460]			Keratin, type II cytoskeletal 1 OS=Homo sapiens OX=9606 GN=KRT1 PE=1 SV=6	P04264	2	2184.13	1.05311e+06	5991541	625937	8.51045e+06	1.32761e+06	1700659	1.10981e+06	164090		High	High	High	High	High	High	High	Peak Found	High	3.781e-05	4.737e-08	6.46	71.99
[R].NLDFQALEETTEYDGGYTR.[D]			2.90209e-07	9.16411e-05	1	3	1	Q05086	Q05086 [764-782]			Ubiquitin-protein ligase E3A OS=Homo sapiens OX=9606 GN=UBE3A PE=1 SV=4	Q05086; Q05086-2; Q05086-3	0	2221.99									No Quan Values	Not Found	Not Found	Not Found	High	Not Found	Not Found	Not Found	Not Found	High	3.781e-05	1.379e-08	4.23
[R].NKLNDLEEALQQAK.[E]			7.84797e-07	9.16411e-05	1	1	21	P35908	P35908 [440-453]			Keratin, type II cytoskeletal 2 epidermal OS=Homo sapiens OX=9606 GN=KRT2 PE=1 SV=2	P35908	1	1613.85	3.36761e+06	2.62166e+06	5.34661e+06	21479798	3.10785e+06	3.2615e+06	3.31087e+06	1.04139e+06		High	High	High	High	High	High	High	High	High	3.781e-05	4.45e-08	4.4	61.22
[R].NKLNDLEEALQQAKEDLAR.[L]			3.93204e-08	9.16411e-05	1	1	7	P35908	P35908 [440-458]			Keratin, type II cytoskeletal 2 epidermal OS=Homo sapiens OX=9606 GN=KRT2 PE=1 SV=2	P35908	2	2198.14	517779	800863	1.19484e+06	1.70354e+07	568921	396422	489688	158275		Peak Found	High	Peak Found	High	Peak Found	High	Peak Found	Peak Found	High	3.781e-05	1.341e-09	4.99	72.85
[R].NKPEVDEAAVDAILSLNIISAK.[Y]			9.6975e-08	9.16411e-05	1	3	4	O60333	O60333 [1321-1342]			Kinesin-like protein KIF1B OS=Homo sapiens OX=9606 GN=KIF1B PE=1 SV=5	O60333-4; O60333; O60333-2	0	2310.26					97843.8		80879.6			High	Not Found	High	Not Found	High	Not Found	High	Not Found	High	3.781e-05	3.855e-09	5.34	85.63
[R].NKPEVDEAAVDAILSLNIISAK.[Y]	1xDeamidated [N]	1xDeamidated [N1; N17]	6.90157e-05	9.16411e-05	1	3	2	O60333	O60333 [1321-1342]			Kinesin-like protein KIF1B OS=Homo sapiens OX=9606 GN=KIF1B PE=1 SV=5	O60333-4; O60333; O60333-2	0	2311.24									No Quan Values	High	Not Found	High	Not Found	Not Found	Not Found	Not Found	Not Found	High	3.781e-05	8.365e-06	4.62
[K].NKPILHTDLDVK.[S]			0.000146878	9.16411e-05	1	4	3	A5YKK6	A5YKK6 [1207-1218]			CCR4-NOT transcription complex subunit 1 OS=Homo sapiens OX=9606 GN=CNOT1 PE=1 SV=2	A5YKK6-2; A5YKK6; A5YKK6-4; A5YKK6-3	0	1392.78	280784				619143					High	Not Found	Not Found	Not Found	High	Not Found	High	Not Found	High	3.781e-05	2.034e-05	3.15	38.61
[R].NKPYISWPSSGGSEPSVTVPLR.[S]			2.50379e-08	9.16411e-05	1	1	5	Q9Y5S2	Q9Y5S2 [1635-1656]			Serine/threonine-protein kinase MRCK beta OS=Homo sapiens OX=9606 GN=CDC42BPB PE=1 SV=2	Q9Y5S2	0	2358.21	1.18534e+06	1.14061e+06	1.51195e+06	788773	866519		750353	658586		High	Peak Found	High	Peak Found	High	Not Found	High	Peak Found	High	3.781e-05	7.895e-10	5.84	65.21
[R].NIAFFSTNCVEGTAR.[G]	1xCarbamidomethyl [C9]	1xCarbamidomethyl [C9]	2.14192e-06	9.16411e-05	1	4	5	P05023	P05023 [241-255]			Sodium/potassium-transporting ATPase subunit alpha-1 OS=Homo sapiens OX=9606 GN=ATP1A1 PE=1 SV=1	P05023-2; P05023; P05023-4; P05023-3	0	1686.79	85739.2	2.32893e+06		2.52562e+06		1.04142e+06		907950		Peak Found	High	Not Found	High	Not Found	High	Not Found	High	High	3.781e-05	1.442e-07	4.06	64.66
[R].NLALCPANHAPLQEAAVIPR.[L]	1xCarbamidomethyl [C5]	1xCarbamidomethyl [C5]	8.21787e-07	9.16411e-05	1	1	5	P14923	P14923 [507-526]			Junction plakoglobin OS=Homo sapiens OX=9606 GN=JUP PE=1 SV=3	P14923	0	2155.14	198747				286100					High	Not Found	Not Found	Not Found	High	High	High	High	High	3.781e-05	4.671e-08	4.01	61.08
[K].NLALDINELKPGNLLK.[D]			7.99745e-05	9.16411e-05	1	4	2	A5YKK6	A5YKK6 [1289-1304]			CCR4-NOT transcription complex subunit 1 OS=Homo sapiens OX=9606 GN=CNOT1 PE=1 SV=2	A5YKK6-2; A5YKK6; A5YKK6-4; A5YKK6-3	0	1765.02					579841		110189			Not Found	Not Found	Not Found	Not Found	High	Not Found	High	Not Found	High	3.781e-05	1.004e-05	4.37	73.44
[R].NLASDFYSDFSVPSTSVGSYESR.[V]			1.62516e-05	9.16411e-05	1	1	3	Q15058	Q15058 [1540-1562]			Kinesin-like protein KIF14 OS=Homo sapiens OX=9606 GN=KIF14 PE=1 SV=1	Q15058	0	2515.13	78194.6		321656		80141		172188			High	Not Found	High	Not Found	Peak Found	Not Found	High	Not Found	High	3.781e-05	1.537e-06	3.52	81.77
[R].NKLNDLEEALQQAK.[E]	1xDeamidated [N4]	1xDeamidated [N4]	0.000184908	9.16411e-05	1	1	4	P35908	P35908 [440-453]			Keratin, type II cytoskeletal 2 epidermal OS=Homo sapiens OX=9606 GN=KRT2 PE=1 SV=2	P35908	1	1614.83	299328		221078		488113	281841	270761	143352		High	Not Found	Peak Found	Not Found	High	Peak Found	High	High	High	3.781e-05	2.669e-05	4.84	56.48
[R].MFFEDEKPALLSQIDAEFEK.[M]	1xOxidation [M1]	1xOxidation [M1]	1.32673e-06	9.16411e-05	1	3	1	Q14008	Q14008 [792-811]			Cytoskeleton-associated protein 5 OS=Homo sapiens OX=9606 GN=CKAP5 PE=1 SV=3	Q14008-2; Q14008; Q14008-3	0	2403.14	70332.9		127088		699272		67807.2			Peak Found	Not Found	Peak Found	Not Found	High	Not Found	Peak Found	Not Found	High	3.781e-05	8.216e-08	4.9	79.13
[R].NESCSENYTTDFIYQLYSEEGK.[G]	1xCarbamidomethyl [C4]	1xCarbamidomethyl [C4]	3.30235e-06	9.16411e-05	1	2	1	Q01813	Q01813 [638-659]			ATP-dependent 6-phosphofructokinase, platelet type OS=Homo sapiens OX=9606 GN=PFKP PE=1 SV=2	Q01813; Q01813-2	0	2677.12						466839				Not Found	Not Found	Not Found	Not Found	Not Found	High	Not Found	Not Found	High	3.781e-05	2.392e-07	4.21	82.95
[K].NENTEGSPQEDGVELEGLK.[Q]			1.61026e-05	9.16411e-05	1	4	2	P11388	P11388 [1241-1259]			DNA topoisomerase 2-alpha OS=Homo sapiens OX=9606 GN=TOP2A PE=1 SV=3	P11388; P11388-2; P11388-3; P11388-4	0	2044.93			351423				77017.9	66517.8		Not Found	Not Found	High	Not Found	Not Found	Not Found	Peak Found	Peak Found	High	3.781e-05	1.53e-06	3.65	55.63
[K].NAPNDASYDAVR.[Q]			5.84714e-05	9.16411e-05	1	1	4	Q92616	Q92616 [1305-1316]			eIF-2-alpha kinase activator GCN1 OS=Homo sapiens OX=9606 GN=GCN1 PE=1 SV=6	Q92616	0	1292.59	451607		964405		442536		131798			High	Not Found	High	Not Found	High	Not Found	High	Not Found	High	3.781e-05	6.934e-06	3.05	38.59
[R].NAQLAQYNFILVVGEK.[E]			1.27842e-07	9.16411e-05	2	4	9	P26639; A2RTX5	P26639 [664-679]; A2RTX5 [743-758]			Threonine--tRNA ligase 1, cytoplasmic OS=Homo sapiens OX=9606 GN=TARS1 PE=1 SV=3 Threonine--tRNA ligase 2, cytoplasmic OS=Homo sapiens OX=9606 GN=TARS3 PE=1 SV=1	P26639; P26639-2; A2RTX5-2; A2RTX5	0	1806.97		4.48154e+06		987956		4.25024e+06		1.26059e+06	Shared	Not Found	High	Not Found	High	Not Found	High	Not Found	High	High	3.781e-05	5.303e-09	4.54	77.8
[K].NASLASSNNDLQVAEEQYQR.[L]			4.27497e-05	9.16411e-05	1	3	1	Q08378	Q08378 [495-514]			Golgin subfamily A member 3 OS=Homo sapiens OX=9606 GN=GOLGA3 PE=1 SV=2	Q08378-2; Q08378-4; Q08378	0	2237.04									No Quan Values	Not Found	Not Found	High	Not Found	Not Found	Not Found	Not Found	Not Found	High	3.781e-05	4.794e-06	4.1
[K].NASILLEELDLEK.[L]			1.09365e-05	9.16411e-05	1	4	2	O75179	O75179 [1455-1467]			Ankyrin repeat domain-containing protein 17 OS=Homo sapiens OX=9606 GN=ANKRD17 PE=1 SV=3	O75179; O75179-7; O75179-6; O75179-2	0	1486.8	189876		246070				145689			High	Not Found	Peak Found	Not Found	Not Found	Not Found	High	Not Found	High	3.781e-05	9.715e-07	3.21	78.11
[R].NASQETVATILK.[C]			4.23578e-05	9.16411e-05	1	2	1	Q8NI35	Q8NI35 [1590-1601]			InaD-like protein OS=Homo sapiens OX=9606 GN=PATJ PE=1 SV=3	Q8NI35; Q8NI35-5	0	1274.7			100883							Not Found	Not Found	High	Not Found	Not Found	Not Found	Not Found	Not Found	High	3.781e-05	4.75e-06	2.6	52.75
[K].NATTDALTSVLTK.[I]			3.68832e-06	9.16411e-05	1	5	4	Q12955	Q12955 [4148-4160]			Ankyrin-3 OS=Homo sapiens OX=9606 GN=ANK3 PE=1 SV=3	Q12955-4; Q12955; Q12955-6; Q12955-7; Q12955-5	0	1334.72	266966		288549				445005	166073		High	Not Found	High	Not Found	High	Not Found	High	Peak Found	High	3.781e-05	2.712e-07	4.31	65.46
[R].NAVALSASPQLK.[E]			0.000149609	9.16411e-05	1	1	1	Q92547	Q92547 [881-892]			DNA topoisomerase 2-binding protein 1 OS=Homo sapiens OX=9606 GN=TOPBP1 PE=1 SV=3	Q92547	0	1198.68			615544							Not Found	Not Found	High	Not Found	Not Found	Not Found	Not Found	Not Found	High	3.781e-05	2.072e-05	3.26	47.92
[R].NAVASVQNGPGGGPSSSSIGSASK.[S]			2.59648e-10	9.16411e-05	1	2	8	Q8NI27	Q8NI27 [1195-1218]			THO complex subunit 2 OS=Homo sapiens OX=9606 GN=THOC2 PE=1 SV=2	Q8NI27; Q8NI27-2	0	2116.03			1.19814e+06		445929		373528			High	Not Found	High	Not Found	High	Not Found	High	Not Found	High	3.781e-05	3.732e-12	4.83	43.65
[R].NAVASVQNGPGGGPSSSSIGSASK.[S]	1xDeamidated [N/Q]	1xDeamidated [Q7; N8]	1.28993e-08	9.16411e-05	1	2	8	Q8NI27	Q8NI27 [1195-1218]			THO complex subunit 2 OS=Homo sapiens OX=9606 GN=THOC2 PE=1 SV=2	Q8NI27; Q8NI27-2	0	2117.01	1.49087e+06		2.88571e+06		1.5777e+06		1.1354e+06			High	Not Found	High	Not Found	High	Not Found	High	Not Found	High	3.781e-05	3.628e-10	4.77	45.33
[K].NAPAIIFIDELDAIAPK.[R]			0.000173363	9.16411e-05	1	1	3	P55072	P55072 [296-312]			Transitional endoplasmic reticulum ATPase OS=Homo sapiens OX=9606 GN=VCP PE=1 SV=4	P55072	0	1810.99									No Quan Values	Not Found	Not Found	Not Found	High	Not Found	High	Not Found	High	High	3.781e-05	2.464e-05	3.01
[R].NAVASVQNGPGGGPSSSSIGSASK.[S]	2xDeamidated [Q7; N8]	2xDeamidated [Q7; N8]	3.03962e-06	9.16411e-05	1	2	2	Q8NI27	Q8NI27 [1195-1218]			THO complex subunit 2 OS=Homo sapiens OX=9606 GN=THOC2 PE=1 SV=2	Q8NI27; Q8NI27-2	0	2117.99									No Quan Values	High	Not Found	Not Found	Not Found	High	Not Found	Not Found	Not Found	High	3.781e-05	2.161e-07	4.46
[K].NAVITVPAYFNDSQR.[Q]			3.65361e-07	9.16411e-05	1	1	9	P38646	P38646 [188-202]			Stress-70 protein, mitochondrial OS=Homo sapiens OX=9606 GN=HSPA9 PE=1 SV=2	P38646	0	1694.85		1.59873e+06	452913	1.79184e+06	299187	1.75177e+06		1.16332e+06		High	Peak Found	High	High	High	High	High	High	High	3.781e-05	1.82e-08	3.47	66.87
[R].NAVTQEFGPVPDTAR.[Y]			5.13733e-07	9.16411e-05	1	1	5	Q99798	Q99798 [634-648]			Aconitate hydratase, mitochondrial OS=Homo sapiens OX=9606 GN=ACO2 PE=1 SV=2	Q99798	0	1601.79						2.37414e+06				Not Found	High	Not Found	High	Not Found	High	Not Found	High	High	3.781e-05	2.699e-08	4.43	56.6
[K].NCAILIENDQSISR.[N]	1xCarbamidomethyl [C2]	1xCarbamidomethyl [C2]	3.45716e-07	9.16411e-05	1	1	4	O60934	O60934 [30-43]			Nibrin OS=Homo sapiens OX=9606 GN=NBN PE=1 SV=1	O60934	0	1632.8		418882		456560				353825		Not Found	High	Not Found	High	Not Found	High	Not Found	High	High	3.781e-05	1.7e-08	3.84	55.61
[K].NCAVEFNFGQR.[A]	1xCarbamidomethyl [C2]	1xCarbamidomethyl [C2]	0.000199046	9.16411e-05	1	4	3	Q9BUJ2	Q9BUJ2 [376-386]			Heterogeneous nuclear ribonucleoprotein U-like protein 1 OS=Homo sapiens OX=9606 GN=HNRNPUL1 PE=1 SV=2	Q9BUJ2; Q9BUJ2-2; Q9BUJ2-3; Q9BUJ2-4	0	1341.6				1.56796e+06				1.70444e+06		Not Found	Not Found	Not Found	High	Not Found	Not Found	Not Found	High	High	3.781e-05	2.908e-05	3.48	57.86
[K].NCLSEAEACVSR.[A]	2xCarbamidomethyl [C2; C9]	2xCarbamidomethyl [C2; C9]	0.000477399	9.16411e-05	1	5	1	P41229	P41229 [817-828]			Lysine-specific demethylase 5C OS=Homo sapiens OX=9606 GN=KDM5C PE=1 SV=2	P41229-5; P41229-3; P41229; P41229-2; P41229-4	0	1395.6			202404							Not Found	Not Found	High	Not Found	Not Found	Not Found	Not Found	Not Found	High	3.781e-05	8.107e-05	2.45	47.76
[R].NCISTVVHQGLIR.[I]	1xCarbamidomethyl [C2]	1xCarbamidomethyl [C2]	0.000138982	9.16411e-05	1	2	6	P78527	P78527 [477-489]			DNA-dependent protein kinase catalytic subunit OS=Homo sapiens OX=9606 GN=PRKDC PE=1 SV=3	P78527-2; P78527	0	1496.8	344057		750087		649137		159200			High	Not Found	High	Not Found	High	Not Found	High	Not Found	High	3.781e-05	1.907e-05	4.2	50.55
[R].NCISYVFEGK.[M]	1xCarbamidomethyl [C2]	1xCarbamidomethyl [C2]	0.000477399	9.16411e-05	1	3	2	O95248-4	O95248-4 [569-578]			Isoform 4 of Myotubularin-related protein 5 OS=Homo sapiens OX=9606 GN=SBF1	O95248-5; O95248; O95248-4	0	1216.57	374941	868893	226230		278862		226285			Peak Found	Peak Found	Peak Found	Not Found	High	Not Found	High	Not Found	High	3.781e-05	8.118e-05	2.59	57.65
[R].NDAPTPGTSTTPGLR.[S]			9.18058e-06	9.16411e-05	1	7	7	Q04726-3	Q04726-3 [324-338]			Isoform 3 of Transducin-like enhancer protein 3 OS=Homo sapiens OX=9606 GN=TLE3	Q04726-5; Q04726-3; Q04726-2; Q04726-4; Q04726-7; Q04726-6; Q04726	0	1484.73		13891185		5219598		3.31353e+06		5.37703e+06		Not Found	High	Not Found	High	Not Found	High	Not Found	High	High	3.781e-05	7.874e-07	3.53	43.63
[R].NDAPTPGTSTTPGLR.[S]	1xDeamidated [N1]	1xDeamidated [N1]	0.000100683	9.16411e-05	1	7	4	Q04726-3	Q04726-3 [324-338]			Isoform 3 of Transducin-like enhancer protein 3 OS=Homo sapiens OX=9606 GN=TLE3	Q04726-5; Q04726-3; Q04726-2; Q04726-4; Q04726-7; Q04726-6; Q04726	0	1485.72		1.30658e+06				456179		912026		Not Found	High	Not Found	High	Not Found	High	Not Found	High	High	3.781e-05	1.304e-05	3.3	51.7
[K].NAVFTQVYEGLKPSDK.[Y]			0.000563446	9.16411e-05	1	2	4	Q5T447	Q5T447 [496-511]			E3 ubiquitin-protein ligase HECTD3 OS=Homo sapiens OX=9606 GN=HECTD3 PE=1 SV=1	Q5T447; Q5T447-2	0	1795.92		792944		583188		173844		467244		Not Found	High	Not Found	High	Not Found	High	Not Found	High	High	3.781e-05	9.862e-05	4.48	58.56
[R].NDASEVVLAGER.[L]			1.8151e-05	9.16411e-05	1	2	4	Q96T88	Q96T88 [365-376]			E3 ubiquitin-protein ligase UHRF1 OS=Homo sapiens OX=9606 GN=UHRF1 PE=1 SV=1	Q96T88-2; Q96T88	0	1259.62		1.95547e+06		2.22526e+06		790704	34790.2	1.25729e+06		Not Found	Peak Found	Not Found	High	Not Found	High	Peak Found	High	High	3.781e-05	1.754e-06	3.71	48.85
[K].NANVQDAATNSAVLNENNVPLPK.[E]			2.9275e-09	9.16411e-05	1	3	6	Q9HCM4	Q9HCM4 [588-610]			Band 4.1-like protein 5 OS=Homo sapiens OX=9606 GN=EPB41L5 PE=1 SV=3	Q9HCM4-4; Q9HCM4-3; Q9HCM4	0	2393.21		872528		397531		1.06689e+06		3.0551e+06		Not Found	High	Not Found	High	Not Found	High	Not Found	High	High	3.781e-05	6.362e-11	5.39	62.75
[R].NALLLLPEEQQDPK.[Q]			2.50561e-05	9.16411e-05	1	6	4	Q9H9A5	Q9H9A5 [467-480]			CCR4-NOT transcription complex subunit 10 OS=Homo sapiens OX=9606 GN=CNOT10 PE=1 SV=1	Q9H9A5-6; Q9H9A5-3; Q9H9A5-4; Q9H9A5; Q9H9A5-5; Q9H9A5-2	0	1607.86		2.6497e+06		649054		550302		666016		Not Found	High	Not Found	High	Not Found	High	Not Found	High	High	3.781e-05	2.56e-06	3	66.98
[K].MVVSIAEDLLR.[T]			0.000197221	9.16411e-05	1	3	1	Q9P2D3	Q9P2D3 [529-539]			HEAT repeat-containing protein 5B OS=Homo sapiens OX=9606 GN=HEATR5B PE=1 SV=2	Q9P2D3-3; Q9P2D3; Q9P2D3-2	0	1245.69	163428		153970		231261	513760	222222			Peak Found	Not Found	Peak Found	Not Found	High	Peak Found	Peak Found	Not Found	High	3.781e-05	2.878e-05	2.52	76.12
[K].MVVSIAEDLLR.[T]	1xOxidation [M1]	1xOxidation [M1]	4.68745e-05	9.16411e-05	1	3	3	Q9P2D3	Q9P2D3 [529-539]			HEAT repeat-containing protein 5B OS=Homo sapiens OX=9606 GN=HEATR5B PE=1 SV=2	Q9P2D3-3; Q9P2D3; Q9P2D3-2	0	1261.68	229781		95260.6		238865		183000			High	Not Found	Peak Found	Not Found	High	Not Found	High	Not Found	High	3.781e-05	5.35e-06	2.78	70.49
[-].MWTPELAILR.[G]	1xOxidation [M1]	1xOxidation [M1]	0.000318368	9.16411e-05	1	1	4	Q6P3X3	Q6P3X3 [1-10]			Tetratricopeptide repeat protein 27 OS=Homo sapiens OX=9606 GN=TTC27 PE=1 SV=1	Q6P3X3	0	1245.67		1.46852e+06		974370		548001		399585		Not Found	High	Not Found	High	Not Found	High	Not Found	High	High	3.781e-05	5.019e-05	2.91	72.93
[R].MWYELDEESR.[R]			4.60189e-05	9.16411e-05	1	1	4	O95602	O95602 [1123-1132]			DNA-directed RNA polymerase I subunit RPA1 OS=Homo sapiens OX=9606 GN=POLR1A PE=1 SV=2	O95602	0	1357.57	764964		830354		433554		167103			High	Not Found	High	Not Found	High	Not Found	High	Not Found	High	3.781e-05	5.215e-06	2.58	62.94
[K].MYLALQSLEQDLSK.[M]			7.02671e-07	9.16411e-05	1	2	1	Q15648	Q15648 [173-186]			Mediator of RNA polymerase II transcription subunit 1 OS=Homo sapiens OX=9606 GN=MED1 PE=1 SV=4	Q15648-3; Q15648	0	1638.84	102028		227160				53728.1			Peak Found	Not Found	High	Not Found	Not Found	Not Found	Peak Found	Not Found	High	3.781e-05	3.885e-08	3.36	80.65
[K].MYLALQSLEQDLSK.[M]	1xOxidation [M1]	1xOxidation [M1]	0.000345877	9.16411e-05	1	2	2	Q15648	Q15648 [173-186]			Mediator of RNA polymerase II transcription subunit 1 OS=Homo sapiens OX=9606 GN=MED1 PE=1 SV=4	Q15648-3; Q15648	0	1654.84	93483		111917				32005.7			High	Not Found	High	Not Found	Not Found	Not Found	Peak Found	Not Found	High	3.781e-05	5.549e-05	2.66	75.83
[R].MYTDMSVSADLNNK.[F]	2xOxidation [M1; M5]	2xOxidation [M1; M5]	1.11344e-07	9.16411e-05	1	2	1	Q13617	Q13617 [476-489]			Cullin-2 OS=Homo sapiens OX=9606 GN=CUL2 PE=1 SV=2	Q13617; Q13617-2	0	1620.69		408780		211627		177636		286768		Not Found	High	Not Found	Peak Found	Not Found	Peak Found	Not Found	Peak Found	High	3.781e-05	4.517e-09	3.21	45.77
[K].MYYFGIAALDR.[F]			9.09817e-05	9.16411e-05	1	4	1	A5YKK6	A5YKK6 [950-960]			CCR4-NOT transcription complex subunit 1 OS=Homo sapiens OX=9606 GN=CNOT1 PE=1 SV=2	A5YKK6-2; A5YKK6; A5YKK6-4; A5YKK6-3	0	1319.65	70091.3				276543		137401	49613.4		Peak Found	Not Found	Not Found	Not Found	High	Not Found	Peak Found	Peak Found	High	3.781e-05	1.167e-05	2.67	76.09
[K].MYYFGIAALDR.[F]	1xOxidation [M1]	1xOxidation [M1]	3.36453e-05	9.16411e-05	1	4	2	A5YKK6	A5YKK6 [950-960]			CCR4-NOT transcription complex subunit 1 OS=Homo sapiens OX=9606 GN=CNOT1 PE=1 SV=2	A5YKK6-2; A5YKK6; A5YKK6-4; A5YKK6-3	0	1335.64	116253	335675		197809	476096	214507	101915			Peak Found	Peak Found	Not Found	Peak Found	High	Peak Found	High	Not Found	High	3.781e-05	3.633e-06	2.59	72.65
[R].NALLQLTDSQIADVAR.[F]			2.28346e-08	9.16411e-05	1	1	5	O75643	O75643 [1994-2009]			U5 small nuclear ribonucleoprotein 200 kDa helicase OS=Homo sapiens OX=9606 GN=SNRNP200 PE=1 SV=2	O75643	0	1727.93			1.24861e+06		997142		130452			Not Found	Not Found	High	Not Found	High	Not Found	Peak Found	Not Found	High	3.781e-05	7.037e-10	3.98	73.64
[R].NAAAQGSPEATLR.[L]			0.000279858	9.16411e-05	1	1	2	Q14674	Q14674 [107-119]			Separin OS=Homo sapiens OX=9606 GN=ESPL1 PE=1 SV=3	Q14674	0	1285.65					293600		70241.9			Not Found	Not Found	Not Found	Not Found	High	Not Found	High	Not Found	High	3.781e-05	4.337e-05	3.45	36.37
[R].NAALNTIVTVYNVHGDQVFK.[L]			5.18487e-07	9.16411e-05	1	3	5	Q14008	Q14008 [1384-1403]			Cytoskeleton-associated protein 5 OS=Homo sapiens OX=9606 GN=CKAP5 PE=1 SV=3	Q14008-2; Q14008; Q14008-3	0	2203.15	245010		525456		2.31455e+06		175863			High	Not Found	High	Not Found	High	Not Found	High	Not Found	High	3.781e-05	2.733e-08	5.43	68.83
[K].NAEDVQHQILATESSNQEYVR.[M]			3.42546e-07	9.16411e-05	1	4	2	O75330	O75330 [490-510]			Hyaluronan mediated motility receptor OS=Homo sapiens OX=9606 GN=HMMR PE=1 SV=2	O75330-2; O75330-3; O75330; O75330-4	0	2431.15				820555		793696		1.19491e+06		Not Found	Not Found	Not Found	Peak Found	Not Found	High	Not Found	High	High	3.781e-05	1.687e-08	7.43	56.72
[K].NAELALFELSR.[V]			0.000365525	9.16411e-05	1	1	2	Q8NBP0	Q8NBP0 [197-207]			Tetratricopeptide repeat protein 13 OS=Homo sapiens OX=9606 GN=TTC13 PE=2 SV=3	Q8NBP0	0	1262.67				346718		233861				Not Found	Not Found	Not Found	High	Not Found	Peak Found	Not Found	High	High	3.781e-05	5.888e-05	3.33	73.65
[R].NAENAIEALK.[E]			0.000518642	9.16411e-05	1	7	6	P16615	P16615 [111-120]			Sarcoplasmic/endoplasmic reticulum calcium ATPase 2 OS=Homo sapiens OX=9606 GN=ATP2A2 PE=1 SV=1	P16615-3; P16615-2; P16615; O14983; O14983-2; P16615-4; P16615-5	0	1072.56	251577	2.97733e+07	828896	2.4377e+07	517030	15492792	128863	1.91867e+07		High	High	Peak Found	High	High	High	Peak Found	High	High	3.781e-05	8.878e-05	3.05	47.1
[R].NAENAIEALKEYEPEMGK.[V]			1.15551e-06	9.16411e-05	1	7	4	P16615	P16615 [111-128]			Sarcoplasmic/endoplasmic reticulum calcium ATPase 2 OS=Homo sapiens OX=9606 GN=ATP2A2 PE=1 SV=1	P16615-3; P16615-2; P16615; O14983; O14983-2; P16615-4; P16615-5	1	2035.96		719935		633402				662296		High	High	Not Found	High	Not Found	Not Found	Not Found	High	High	3.781e-05	7.026e-08	6.27	66.39
[R].NAENAIEALKEYEPEMGK.[V]	1xOxidation [M16]	1xOxidation [M16]	1.70176e-05	9.16411e-05	1	7	5	P16615	P16615 [111-128]			Sarcoplasmic/endoplasmic reticulum calcium ATPase 2 OS=Homo sapiens OX=9606 GN=ATP2A2 PE=1 SV=1	P16615-3; P16615-2; P16615; O14983; O14983-2; P16615-4; P16615-5	1	2051.96	181469	1.16557e+06	255686	1.92069e+06	71841	537257		677022		High	High	Peak Found	High	Peak Found	High	Not Found	High	High	3.781e-05	1.627e-06	5.16	61.23
[K].NAFGLHLIDFMSEILK.[Q]	1xOxidation [M11]	1xOxidation [M11]	0.000107388	9.16411e-05	1	1	3	Q15003	Q15003 [127-142]			Condensin complex subunit 2 OS=Homo sapiens OX=9606 GN=NCAPH PE=1 SV=3	Q15003	0	1863.97				387593		131540		214319		Not Found	High	Not Found	High	Not Found	Peak Found	Not Found	High	High	3.781e-05	1.412e-05	2.65	80.07
[K].NAGVEGSLIVEK.[I]			0.000285061	9.16411e-05	1	1	5	P10809	P10809 [482-493]			60 kDa heat shock protein, mitochondrial OS=Homo sapiens OX=9606 GN=HSPD1 PE=1 SV=2	P10809	0	1215.66			366119	507672	249098	290509	39961.9	235949		High	Not Found	High	High	High	Peak Found	Peak Found	High	High	3.781e-05	4.414e-05	2.78	49.42
[K].NALESYAFNMK.[S]	1xOxidation [M10]	1xOxidation [M10]	0.000513889	9.16411e-05	1	3	5	P0DMV9	P0DMV9 [540-550]			Heat shock 70 kDa protein 1B OS=Homo sapiens OX=9606 GN=HSPA1B PE=1 SV=1	P0DMV8-2; P0DMV9; P34931	0	1303.6	216109		705162	1.61843e+06	241544	567930	86299.6	145879		Peak Found	Not Found	High	High	Peak Found	High	Peak Found	High	High	3.781e-05	8.837e-05	2.46	53.74
[K].NAALDVEPIHAFR.[A]			5.95585e-05	9.16411e-05	1	2	4	Q9NRL3	Q9NRL3 [476-488]			Striatin-4 OS=Homo sapiens OX=9606 GN=STRN4 PE=1 SV=2	Q9NRL3; Q9NRL3-3	0	1452.76				982200		549087		565966		Not Found	High	Not Found	High	Not Found	High	Not Found	High	High	3.781e-05	7.077e-06	3.78	57.37
[R].NERPDGVLLTFGGQTALNCGVELTK.[A]	1xCarbamidomethyl [C19]	1xCarbamidomethyl [C19]	1.42853e-05	9.16411e-05	1	1	1	P27708	P27708 [466-490]			CAD protein OS=Homo sapiens OX=9606 GN=CAD PE=1 SV=3	P27708	0	2689.36									No Quan Values	Not Found	Not Found	High	Not Found	Not Found	Not Found	Not Found	Not Found	High	3.781e-05	1.328e-06	5.2
[R].NDDDSSEAMNDILAQVATNTETSK.[N]			6.64726e-08	9.16411e-05	1	2	3	O43747	O43747 [259-282]			AP-1 complex subunit gamma-1 OS=Homo sapiens OX=9606 GN=AP1G1 PE=1 SV=5	O43747-2; O43747	0	2569.12		410030		338984						Not Found	High	Not Found	High	Not Found	Not Found	Not Found	High	High	3.781e-05	2.47e-09	4.25	83.04
[R].NDFLVLHLADLIR.[M]			0.000568657	9.16411e-05	1	2	1	Q86XA9	Q86XA9 [1257-1269]			HEAT repeat-containing protein 5A OS=Homo sapiens OX=9606 GN=HEATR5A PE=1 SV=2	Q86XA9; Q86XA9-2	0	1538.87							110733			Not Found	Not Found	Not Found	Not Found	Not Found	Not Found	High	Not Found	High	3.781e-05	9.891e-05	2.75	85.39
[R].NEENEQDGDLEGPVIDESVLSTK.[E]			6.00967e-06	9.16411e-05	1	6	1	Q5VYS8	Q5VYS8 [190-212]			Terminal uridylyltransferase 7 OS=Homo sapiens OX=9606 GN=TUT7 PE=1 SV=1	Q5VYS8-4; Q5VYS8; Q5VYS8-6; Q5VYS8-2; Q5VYS8-5; Q5VYS8-3	0	2517.15									No Quan Values	Not Found	Not Found	High	Not Found	Not Found	Not Found	Not Found	Not Found	High	3.781e-05	4.802e-07	3.55
[K].NEEPSEEEIDAPKPK.[K]			8.84414e-08	9.16411e-05	1	2	9	Q9NR30	Q9NR30 [117-131]			Nucleolar RNA helicase 2 OS=Homo sapiens OX=9606 GN=DDX21 PE=1 SV=5	Q9NR30; Q9NR30-2	0	1711.8		6.92858e+06		5.2582e+06		1.32821e+06		4.59514e+06		Not Found	High	High	High	Not Found	High	Not Found	High	High	3.781e-05	3.457e-09	4.91	38.1
[truncated: 18,267 more rows]

## Sheet: unmodified Q1 peptides
Annotated Sequence	Modifications	Modifications (all possible sites)	Qvality PEP	Qvality q-value	# Protein Groups	# Proteins	# PSMs	Master Protein Accessions	Positions in Master Proteins	Modifications in Master Proteins (all Sites)	Modifications in Master Proteins	Master Protein Descriptions	Protein Accessions	# Missed Cleavages	Theo. MH+ [Da]	Abundances : Q1YFP_gnano_dimer	Abundances : Q1YFP_gnano_mono	Abundances: Q1YFP_nanoCa_dimer	Abundances : Q1YFP_nanoCa_mono	Abundances : Q1YFP_PKACa_dimer	Abundances : Q1YFP_PKACa_mono	Abundances: UT_dimer	Abundances : UT_Mono	Quan Info	Found in Sample: [S12] F12: Sample, Q1YFP_gnano_dimer	Found in Sample: [S16] F16: Sample, Q1YFP_gnano_mono	Found in Sample: [S11] F11: Sample, Q1YFP_nanoCa_dimer	Found in Sample: [S15] F15: Sample, Q1YFP_nanoCa_mono	Found in Sample: [S10] F10: Sample, Q1YFP_PKACa_dimer	Found in Sample: [S14] F14: Sample, Q1YFP_PKACa_mono	Found in Sample: [S9] F9: Sample, UT_dimer	Found in Sample: [S13] F13: Sample, UT_Mono	Confidence (by Search Engine): Sequest HT	Percolator q-Value (by Search Engine): Sequest HT	Percolator PEP (by Search Engine): Sequest HT	XCorr (by Search Engine): Sequest HT	Top Apex RT [min]
[truncated: 35 more rows]

[truncated: 12 more sheets: S6, S92, S253, S402 407 409, S457 , S468 T470, S484 T498, S546, S571 S577, T610 S623 T624 S627, S644, summary]
