# Supplementary material for: Divergent regulation of KCNQ1/E1 by targeted recruitment of protein kinase A to distinct sites on the channel complex
Source: eLife journal article supplement (doi:10.7554/elife.83466), 2023-08-31
Supplement: supp [file Figure 6 - source data 2.xlsx]

## Sheet: Figure 6B and 6C 
		Geometric mean BTX-647
	N	Nano	nanoCa
WT BBS-Q1-YFP	1	1425	774
	2	1534	732
	3	1330	917
	4	1344	973
	Mean	1408.25	849	t-test p=	0.000333127
	SEM	40.5777	49.5694	% reduction	0.397124
BBS-3S/A-YFP	1	1017	809
	2	1061	964
	3	1007	971
	4	1009	776
	Mean	1023.5	880	t-test p=	0.0632042
	SEM	10.9858	44.1546	% reduction	0.140205	Baseline change compared to nano	0.273211
BBS-3D/A-YFP	1	1222	818
	2	1166	766
	3	1090	1035
	4	1107	1114
	Mean	1146.25	933.25	t-test p=	0.0791008
	SEM	26.0201	72.577	% reduction	0.185823	Baseline change compared to nano	0.186047
comparing nano conditions	p= 0.0000	(One-way anova)
	Tukey HSD Post-hoc Test...
	Group 1 vs Group 2: Diff=-384.7500, 95%CI=-497.4559 to -272.0441, p=0.0000
	Group 1 vs Group 3: Diff=-262.0000, 95%CI=-374.7059 to -149.2941, p=0.0003
	Group 2 vs Group 3: Diff=122.7500, 95%CI=10.0441 to 235.4559, p=0.0339
